# Supplementary material
Source: publisher figshare collection journal article supplement (https://acs.figshare.com/ndownloader/files/3884863)
Supplement: Supplementary file 1 [file 3884863]

 
data_shelxl
 
_audit_creation_method            SHELXL-2013
_chemical_name_systematic
;
 ?
;
_chemical_name_common             ?
_chemical_melting_point           ?
_chemical_formula_moiety          'C39 H30 N4 O Pd'
_chemical_formula_sum
 'C39 H30 N4 O Pd' 
_chemical_formula_weight          677.07

loop_
 _atom_type_symbol
 _atom_type_description
 _atom_type_scat_dispersion_real
 _atom_type_scat_dispersion_imag
 _atom_type_scat_source
 'C'  'C'   0.0033   0.0016
 'International Tables Vol C Tables 4.2.6.8 and 6.1.1.4'
 'H'  'H'   0.0000   0.0000
 'International Tables Vol C Tables 4.2.6.8 and 6.1.1.4'
 'N'  'N'   0.0061   0.0033
 'International Tables Vol C Tables 4.2.6.8 and 6.1.1.4'
 'O'  'O'   0.0106   0.0060
 'International Tables Vol C Tables 4.2.6.8 and 6.1.1.4'
 'Pd'  'Pd'  -0.9988   1.0072
 'International Tables Vol C Tables 4.2.6.8 and 6.1.1.4'
 
_space_group_crystal_system       monoclinic
_space_group_IT_number            14
_space_group_name_H-M_alt         'P 21/n'
_space_group_name_Hall            '-P 2yn'
 
_shelx_space_group_comment
;
The symmetry employed for this shelxl refinement is uniquely defined
by the following loop, which should always be used as a source of
symmetry information in preference to the above space-group names.
They are only intended as comments.
;
 
loop_
 _space_group_symop_operation_xyz
 'x, y, z'
 '-x+1/2, y+1/2, -z+1/2'
 '-x, -y, -z'
 'x-1/2, -y-1/2, z-1/2'
 
_cell_length_a                    11.352(4)
_cell_length_b                    10.914(4)
_cell_length_c                    24.893(9)
_cell_angle_alpha                 90
_cell_angle_beta                  90.047(5)
_cell_angle_gamma                 90
_cell_volume                      3084.1(19)
_cell_formula_units_Z             4
_cell_measurement_temperature     100(2)
_cell_measurement_reflns_used     6586
_cell_measurement_theta_min       3.0 
_cell_measurement_theta_max       29.1 
 
_exptl_crystal_description        'Prism'
_exptl_crystal_colour             'Orange' 
_exptl_crystal_density_meas       ? 
_exptl_crystal_density_method     'not measured'              
_exptl_crystal_density_diffrn     1.458          
_exptl_crystal_F_000              1384
_exptl_transmission_factor_min    ?                                             
_exptl_transmission_factor_max    ?                                             
_exptl_crystal_size_max           0.200
_exptl_crystal_size_mid           0.200
_exptl_crystal_size_min           0.200
_exptl_absorpt_coefficient_mu     0.640
_shelx_estimated_absorpt_T_min    0.883
_shelx_estimated_absorpt_T_max    0.883
_exptl_absorpt_correction_type    'Numerical' 
_exptl_absorpt_correction_T_min   0.924 
_exptl_absorpt_correction_T_max   0.983 
_exptl_absorpt_process_details    'NUMABS (Rigaku, 1999)' 
 
_exptl_special_details
;
 ?
;
 
_diffrn_ambient_temperature       100(2)
_diffrn_radiation_wavelength      0.71075
_diffrn_radiation_type            MoK\a
_diffrn_source                    'MicroMax003_Mo'                       
_diffrn_measurement_device_type   'Rigaku Saturn724+ (4x4 bin mode)' 
_diffrn_measurement_method        'profile data from \w-scans' 
_diffrn_detector_area_resol_mean  28.5714 
_diffrn_reflns_number             36293
_diffrn_reflns_av_unetI/netI      0.0748
_diffrn_reflns_av_R_equivalents   0.0843
_diffrn_reflns_limit_h_min        -15
_diffrn_reflns_limit_h_max        15
_diffrn_reflns_limit_k_min        -14
_diffrn_reflns_limit_k_max        11
_diffrn_reflns_limit_l_min        -34
_diffrn_reflns_limit_l_max        34
_diffrn_reflns_theta_min          3.040
_diffrn_reflns_theta_max          29.131
_diffrn_reflns_theta_full         25.242
_diffrn_measured_fraction_theta_max   0.998
_diffrn_measured_fraction_theta_full  0.998
_diffrn_reflns_Laue_measured_fraction_max    0.998
_diffrn_reflns_Laue_measured_fraction_full   0.998
_diffrn_reflns_point_group_measured_fraction_max   0.998
_diffrn_reflns_point_group_measured_fraction_full  0.998
_reflns_number_total              8280
_reflns_number_gt                 7241
_reflns_threshold_expression      'I > 2\s(I)'
_reflns_Friedel_coverage          0.000
_reflns_Friedel_fraction_max      .
_reflns_Friedel_fraction_full     .
 
_reflns_special_details
;
 Reflections were merged by SHELXL according to the crystal
 class for the calculation of statistics and refinement.
 
 _reflns_Friedel_fraction is defined as the number of unique
 Friedel pairs measured divided by the number that would be
 possible theoretically, ignoring centric projections and
 systematic absences.
;
 
_computing_data_collection        'CrystalClear-SM Expert 2.1 b28 (Rigaku, 2013)'
_computing_cell_refinement        'CrystalClear-SM Expert 2.1 b28 (Rigaku, 2013)'
_computing_data_reduction         'CrystalClear-SM Expert 2.1 b28 (Rigaku, 2013)'
_computing_structure_solution     'SHELXS97 (Sheldrick, 2008)'
_computing_structure_refinement   'SHELXL-2013 (Sheldrick, 2013)'
_computing_molecular_graphics     'CrystalStructure 4.0'
_computing_publication_material   'CrystalStructure 4.0 (Rigaku, 2010)'
 
_refine_special_details
;
 Refinement of F^2^ against ALL reflections.  The weighted R-factor wR and 
 goodness of fit S are based on F^2^, conventional R-factors R are based 
 on F, with F set to zero for negative F^2^. The threshold expression of 
 F^2^ > 2sigma(F^2^) is used only for calculating R-factors(gt) etc. and is 
 not relevant to the choice of reflections for refinement.  R-factors based 
 on F^2^ are statistically about twice as large as those based on F, and R- 
 factors based on ALL data will be even larger. 
;
_refine_ls_structure_factor_coef  Fsqd
_refine_ls_matrix_type            full
_refine_ls_weighting_scheme       calc
_refine_ls_weighting_details
;
 w=1/[\s^2^(Fo^2^)+10.7889P]
 where P=(Fo^2^+2Fc^2^)/3
;
_atom_sites_solution_primary      direct
_atom_sites_solution_secondary    difmap
_atom_sites_solution_hydrogens    geom
_refine_ls_hydrogen_treatment     mixed
_refine_ls_extinction_method      none
_refine_ls_extinction_coef        .
_refine_ls_number_reflns          8280
_refine_ls_number_parameters      526
_refine_ls_number_restraints      0
_refine_ls_R_factor_all           0.0831
_refine_ls_R_factor_gt            0.0705
_refine_ls_wR_factor_ref          0.1227
_refine_ls_wR_factor_gt           0.1171
_refine_ls_goodness_of_fit_ref    1.157
_refine_ls_restrained_S_all       1.157
_refine_ls_shift/su_max           0.001
_refine_ls_shift/su_mean          0.000
 
loop_
 _atom_site_label
 _atom_site_type_symbol
 _atom_site_fract_x
 _atom_site_fract_y
 _atom_site_fract_z
 _atom_site_U_iso_or_equiv
 _atom_site_adp_type
 _atom_site_occupancy
 _atom_site_site_symmetry_order  
 _atom_site_calc_flag
 _atom_site_refinement_flags_posn
 _atom_site_refinement_flags_adp
 _atom_site_refinement_flags_occupancy
 _atom_site_disorder_assembly
 _atom_site_disorder_group
Pd1 Pd 0.57003(3) 0.70591(3) 0.42171(2) 0.01657(8) Uani 1 1 d . . . . .
O1 O 0.4769(2) 0.8025(3) 0.53944(11) 0.0190(6) Uani 1 1 d . . . . .
N1 N 0.6905(3) 0.7522(3) 0.36789(13) 0.0188(7) Uani 1 1 d . . . . .
N2 N 0.6872(3) 0.8335(3) 0.47004(13) 0.0203(7) Uani 1 1 d . . . . .
N3 N 0.4255(3) 0.6012(3) 0.46400(12) 0.0160(6) Uani 1 1 d . . . . .
N4 N 0.5207(3) 0.5887(3) 0.36581(13) 0.0181(7) Uani 1 1 d . . . . .
C1 C 0.7071(4) 0.7240(4) 0.31567(16) 0.0232(9) Uani 1 1 d . . . . .
C2 C 0.8217(4) 0.7613(4) 0.30143(19) 0.0281(10) Uani 1 1 d . . . . .
H2 H 0.852(4) 0.751(5) 0.267(2) 0.038(14) Uiso 1 1 d . . . . .
C3 C 0.8755(4) 0.8094(5) 0.34654(19) 0.0295(10) Uani 1 1 d . . . . .
H3 H 0.950(4) 0.841(5) 0.3512(19) 0.037(14) Uiso 1 1 d . . . . .
C4 C 0.7913(3) 0.8027(4) 0.38746(17) 0.0239(9) Uani 1 1 d . . . . .
C5 C 0.7877(4) 0.8434(4) 0.44081(17) 0.0227(9) Uani 1 1 d . . . . .
C6 C 0.8799(4) 0.9050(5) 0.4693(2) 0.0319(11) Uani 1 1 d . . . . .
H6 H 0.950(4) 0.912(4) 0.4562(19) 0.033(14) Uiso 1 1 d . . . . .
C7 C 0.8342(4) 0.9392(5) 0.5162(2) 0.0295(10) Uani 1 1 d . . . . .
H7 H 0.869(4) 0.977(5) 0.544(2) 0.040(15) Uiso 1 1 d . . . . .
C8 C 0.7124(4) 0.8996(4) 0.51792(16) 0.0208(8) Uani 1 1 d . . . . .
C9 C 0.6393(3) 0.9345(4) 0.55920(16) 0.0197(8) Uani 1 1 d . . . . .
C10 C 0.6877(4) 1.0220(4) 0.60020(16) 0.0221(9) Uani 1 1 d . . . . .
C11 C 0.7051(4) 1.1444(4) 0.58815(18) 0.0274(10) Uani 1 1 d . . . . .
H11 H 0.688(4) 1.177(4) 0.5535(17) 0.023(12) Uiso 1 1 d . . . . .
C12 C 0.7499(4) 1.2255(4) 0.62569(19) 0.0269(10) Uani 1 1 d . . . . .
H12 H 0.763(4) 1.306(5) 0.6172(19) 0.036(14) Uiso 1 1 d . . . . .
C13 C 0.7786(3) 1.1853(4) 0.67720(16) 0.0212(8) Uani 1 1 d . . . . .
C14 C 0.7618(4) 1.0628(4) 0.68948(17) 0.0249(9) Uani 1 1 d . . . . .
H14 H 0.776(3) 1.040(4) 0.7247(16) 0.014(10) Uiso 1 1 d . . . . .
C15 C 0.7152(4) 0.9819(4) 0.65211(17) 0.0270(10) Uani 1 1 d . . . . .
H15 H 0.702(4) 0.900(5) 0.6605(19) 0.037(14) Uiso 1 1 d . . . . .
C16 C 0.8250(5) 1.2742(5) 0.7183(2) 0.0297(10) Uani 1 1 d . . . . .
H16A H 0.769(4) 1.337(5) 0.7227(19) 0.034(14) Uiso 1 1 d . . . . .
H16B H 0.900(5) 1.308(5) 0.709(2) 0.054(17) Uiso 1 1 d . . . . .
H16C H 0.833(5) 1.240(6) 0.751(2) 0.063(19) Uiso 1 1 d . . . . .
C17 C 0.5220(3) 0.8998(4) 0.56758(16) 0.0202(8) Uani 1 1 d . . . . .
C18 C 0.4377(4) 0.9431(4) 0.60308(17) 0.0228(9) Uani 1 1 d . . . . .
H18 H 0.453(4) 1.005(4) 0.6270(18) 0.026(12) Uiso 1 1 d . . . . .
C19 C 0.3387(4) 0.8698(4) 0.59684(17) 0.0220(9) Uani 1 1 d . . . . .
H19 H 0.268(4) 0.878(4) 0.6147(19) 0.034(14) Uiso 1 1 d . . . . .
C20 C 0.3653(3) 0.7836(4) 0.55871(15) 0.0192(8) Uani 1 1 d . . . . .
C21 C 0.3041(3) 0.6762(4) 0.54274(15) 0.0189(8) Uani 1 1 d . . . . .
C22 C 0.1926(3) 0.6542(4) 0.57359(15) 0.0192(8) Uani 1 1 d . . . . .
C23 C 0.1898(4) 0.5734(4) 0.61633(17) 0.0243(9) Uani 1 1 d . . . . .
H23 H 0.253(4) 0.537(4) 0.6281(18) 0.030(13) Uiso 1 1 d . . . . .
C24 C 0.0853(4) 0.5523(4) 0.64436(17) 0.0253(9) Uani 1 1 d . . . . .
H24 H 0.087(4) 0.495(4) 0.6729(18) 0.030(13) Uiso 1 1 d . . . . .
C25 C -0.0172(4) 0.6140(4) 0.63084(17) 0.0236(9) Uani 1 1 d . . . . .
C26 C -0.0139(4) 0.6967(5) 0.58893(19) 0.0320(11) Uani 1 1 d . . . . .
H26 H -0.085(5) 0.742(5) 0.577(2) 0.057(18) Uiso 1 1 d . . . . .
C27 C 0.0898(4) 0.7159(5) 0.56025(18) 0.0295(10) Uani 1 1 d . . . . .
H27 H 0.092(4) 0.775(4) 0.5322(19) 0.033(13) Uiso 1 1 d . . . . .
C28 C -0.1308(4) 0.5923(5) 0.6607(2) 0.0300(10) Uani 1 1 d . . . . .
H28A H -0.182(5) 0.536(5) 0.642(2) 0.045(16) Uiso 1 1 d . . . . .
H28B H -0.118(4) 0.548(5) 0.694(2) 0.040(15) Uiso 1 1 d . . . . .
H28C H -0.178(5) 0.673(6) 0.665(2) 0.057(18) Uiso 1 1 d . . . . .
C29 C 0.3372(3) 0.5935(4) 0.50440(15) 0.0171(8) Uani 1 1 d . . . . .
C30 C 0.2734(4) 0.4783(4) 0.49756(16) 0.0197(8) Uani 1 1 d . . . . .
H30 H 0.213(4) 0.458(4) 0.5208(19) 0.035(14) Uiso 1 1 d . . . . .
C31 C 0.3201(4) 0.4181(4) 0.45597(17) 0.0215(8) Uani 1 1 d . . . . .
H31 H 0.304(4) 0.349(5) 0.4413(19) 0.033(14) Uiso 1 1 d . . . . .
C32 C 0.4102(3) 0.4981(4) 0.43462(15) 0.0175(8) Uani 1 1 d . . . . .
C33 C 0.4623(3) 0.4865(4) 0.38401(16) 0.0188(8) Uani 1 1 d . . . . .
C34 C 0.4546(4) 0.4017(4) 0.34211(18) 0.0248(9) Uani 1 1 d . . . . .
H34 H 0.424(4) 0.328(4) 0.3439(17) 0.024(12) Uiso 1 1 d . . . . .
C35 C 0.5101(4) 0.4555(4) 0.29792(18) 0.0264(9) Uani 1 1 d . . . . .
H35 H 0.518(5) 0.422(5) 0.265(2) 0.048(16) Uiso 1 1 d . . . . .
C36 C 0.5511(3) 0.5706(4) 0.31393(16) 0.0218(8) Uani 1 1 d . . . . .
C37 C 0.6113(4) 0.6714(4) 0.28220(16) 0.0249(9) Uani 1 1 d . . . . .
C38 C 0.5196(5) 0.7715(5) 0.2703(2) 0.0347(11) Uani 1 1 d . . . . .
H38A H 0.555(5) 0.840(5) 0.256(2) 0.044(16) Uiso 1 1 d . . . . .
H38B H 0.455(5) 0.744(5) 0.248(2) 0.061(18) Uiso 1 1 d . . . . .
H38C H 0.484(4) 0.805(5) 0.304(2) 0.044(15) Uiso 1 1 d . . . . .
C39 C 0.6592(5) 0.6195(6) 0.2292(2) 0.0379(12) Uani 1 1 d . . . . .
H39A H 0.721(4) 0.558(5) 0.2347(18) 0.032(14) Uiso 1 1 d . . . . .
H39B H 0.591(4) 0.590(4) 0.2043(19) 0.033(13) Uiso 1 1 d . . . . .
H39C H 0.697(4) 0.683(5) 0.2102(19) 0.030(13) Uiso 1 1 d . . . . .
 
loop_
 _atom_site_aniso_label
 _atom_site_aniso_U_11
 _atom_site_aniso_U_22
 _atom_site_aniso_U_33
 _atom_site_aniso_U_23
 _atom_site_aniso_U_13
 _atom_site_aniso_U_12
Pd1 0.01568(14) 0.01816(15) 0.01586(15) 0.00113(12) 0.00099(10) -0.00134(12)
O1 0.0180(13) 0.0200(14) 0.0189(14) -0.0021(11) 0.0004(10) -0.0041(11)
N1 0.0161(16) 0.0201(17) 0.0202(17) -0.0008(14) 0.0058(13) -0.0022(13)
N2 0.0189(17) 0.0217(18) 0.0205(17) 0.0026(14) 0.0007(13) -0.0026(14)
N3 0.0125(15) 0.0208(17) 0.0148(15) 0.0016(13) 0.0003(12) -0.0010(13)
N4 0.0151(15) 0.0212(18) 0.0180(16) -0.0017(14) 0.0011(12) 0.0001(13)
C1 0.028(2) 0.020(2) 0.021(2) 0.0019(17) 0.0055(16) 0.0028(17)
C2 0.027(2) 0.031(3) 0.026(2) -0.0018(19) 0.0131(18) -0.0026(19)
C3 0.023(2) 0.034(3) 0.031(2) -0.001(2) 0.0092(18) -0.006(2)
C4 0.0184(19) 0.027(2) 0.026(2) -0.0027(18) 0.0048(16) -0.0044(17)
C5 0.021(2) 0.021(2) 0.026(2) 0.0029(17) 0.0020(16) -0.0059(16)
C6 0.018(2) 0.037(3) 0.041(3) -0.002(2) 0.0051(19) -0.0110(19)
C7 0.022(2) 0.033(3) 0.033(3) 0.001(2) -0.0009(18) -0.0114(19)
C8 0.024(2) 0.016(2) 0.022(2) 0.0030(16) -0.0023(16) -0.0068(16)
C9 0.024(2) 0.0155(19) 0.0202(19) 0.0040(16) -0.0024(15) -0.0040(16)
C10 0.022(2) 0.024(2) 0.021(2) 0.0014(17) -0.0038(16) -0.0028(16)
C11 0.037(3) 0.021(2) 0.024(2) 0.0032(18) -0.0100(19) -0.0053(18)
C12 0.034(2) 0.015(2) 0.032(2) 0.0003(18) -0.0071(19) -0.0060(17)
C13 0.0181(19) 0.023(2) 0.022(2) -0.0032(17) -0.0007(15) 0.0002(16)
C14 0.031(2) 0.028(2) 0.0158(19) 0.0021(18) -0.0014(17) -0.0039(18)
C15 0.036(3) 0.023(2) 0.022(2) 0.0060(18) -0.0056(18) -0.0082(19)
C16 0.037(3) 0.026(3) 0.026(2) -0.004(2) -0.005(2) 0.000(2)
C17 0.022(2) 0.0143(19) 0.025(2) -0.0003(16) -0.0017(16) -0.0047(15)
C18 0.028(2) 0.020(2) 0.021(2) -0.0029(17) -0.0007(16) 0.0001(17)
C19 0.023(2) 0.022(2) 0.022(2) -0.0041(17) 0.0028(16) 0.0005(17)
C20 0.0179(18) 0.021(2) 0.0188(19) 0.0045(16) 0.0012(14) -0.0006(16)
C21 0.0171(18) 0.023(2) 0.0166(19) 0.0031(16) 0.0003(14) -0.0006(15)
C22 0.0175(19) 0.022(2) 0.0182(19) 0.0006(16) -0.0006(15) -0.0014(16)
C23 0.023(2) 0.027(2) 0.023(2) 0.0037(18) -0.0003(17) 0.0046(18)
C24 0.034(2) 0.022(2) 0.020(2) 0.0048(18) 0.0043(17) -0.0016(18)
C25 0.022(2) 0.027(2) 0.022(2) -0.0036(18) 0.0027(16) -0.0047(17)
C26 0.021(2) 0.042(3) 0.033(3) 0.011(2) 0.0037(18) -0.001(2)
C27 0.026(2) 0.036(3) 0.027(2) 0.014(2) 0.0001(18) -0.0044(19)
C28 0.025(2) 0.035(3) 0.029(2) -0.001(2) 0.0037(19) -0.007(2)
C29 0.0179(18) 0.0176(19) 0.0156(18) 0.0049(15) -0.0008(14) 0.0000(15)
C30 0.020(2) 0.022(2) 0.0177(19) 0.0043(16) 0.0010(15) -0.0023(16)
C31 0.023(2) 0.021(2) 0.020(2) 0.0022(17) -0.0024(16) -0.0057(17)
C32 0.0153(18) 0.0178(19) 0.0194(19) 0.0018(16) -0.0036(14) -0.0018(15)
C33 0.0165(18) 0.019(2) 0.021(2) -0.0001(16) -0.0029(15) -0.0028(15)
C34 0.018(2) 0.027(2) 0.029(2) -0.0049(19) -0.0001(16) -0.0026(18)
C35 0.025(2) 0.033(3) 0.021(2) -0.0071(19) 0.0008(17) -0.0014(19)
C36 0.020(2) 0.027(2) 0.0182(19) 0.0004(17) 0.0000(15) 0.0022(17)
C37 0.024(2) 0.035(3) 0.0158(19) -0.0015(18) 0.0046(16) 0.0023(18)
C38 0.034(3) 0.042(3) 0.028(3) 0.011(2) -0.003(2) 0.003(2)
C39 0.041(3) 0.049(3) 0.023(2) -0.005(2) 0.012(2) -0.006(3)
 
_geom_special_details
;
 All esds (except the esd in the dihedral angle between two l.s. planes)
 are estimated using the full covariance matrix.  The cell esds are taken
 into account individually in the estimation of esds in distances, angles
 and torsion angles; correlations between esds in cell parameters are only
 used when they are defined by crystal symmetry.  An approximate (isotropic)
 treatment of cell esds is used for estimating esds involving l.s. planes.
;
 
loop_
 _geom_bond_atom_site_label_1
 _geom_bond_atom_site_label_2
 _geom_bond_distance
 _geom_bond_site_symmetry_2
 _geom_bond_publ_flag
Pd1 N4 1.971(3) . ?
Pd1 N1 1.981(3) . ?
Pd1 N3 2.260(3) . ?
Pd1 N2 2.271(3) . ?
O1 C20 1.371(5) . ?
O1 C17 1.371(5) . ?
N1 C1 1.349(5) . ?
N1 C4 1.359(5) . ?
N2 C5 1.358(5) . ?
N2 C8 1.422(5) . ?
N3 C32 1.353(5) . ?
N3 C29 1.423(5) . ?
N4 C36 1.352(5) . ?
N4 C33 1.374(5) . ?
C1 C2 1.408(6) . ?
C1 C37 1.485(6) . ?
C2 C3 1.382(6) . ?
C2 H2 0.93(5) . ?
C3 C4 1.400(6) . ?
C3 H3 0.92(5) . ?
C4 C5 1.401(6) . ?
C5 C6 1.432(6) . ?
C6 C7 1.331(7) . ?
C6 H6 0.87(5) . ?
C7 C8 1.449(6) . ?
C7 H7 0.89(5) . ?
C8 C9 1.376(6) . ?
C9 C17 1.400(5) . ?
C9 C10 1.501(5) . ?
C10 C11 1.383(6) . ?
C10 C15 1.399(6) . ?
C11 C12 1.384(6) . ?
C11 H11 0.95(4) . ?
C12 C13 1.393(6) . ?
C12 H12 0.92(5) . ?
C13 C14 1.384(6) . ?
C13 C16 1.505(6) . ?
C14 C15 1.387(6) . ?
C14 H14 0.93(4) . ?
C15 H15 0.93(5) . ?
C16 H16A 0.95(5) . ?
C16 H16B 0.96(6) . ?
C16 H16C 0.91(6) . ?
C17 C18 1.386(6) . ?
C18 C19 1.388(6) . ?
C18 H18 0.92(5) . ?
C19 C20 1.370(6) . ?
C19 H19 0.92(5) . ?
C20 C21 1.419(5) . ?
C21 C29 1.367(6) . ?
C21 C22 1.500(5) . ?
C22 C23 1.382(6) . ?
C22 C27 1.388(6) . ?
C23 C24 1.396(6) . ?
C23 H23 0.87(5) . ?
C24 C25 1.386(6) . ?
C24 H24 0.95(5) . ?
C25 C26 1.380(6) . ?
C25 C28 1.507(6) . ?
C26 C27 1.393(6) . ?
C26 H26 0.99(6) . ?
C27 H27 0.95(5) . ?
C28 H28A 0.96(5) . ?
C28 H28B 0.97(5) . ?
C28 H28C 1.04(6) . ?
C29 C30 1.460(5) . ?
C30 C31 1.337(6) . ?
C30 H30 0.92(5) . ?
C31 C32 1.446(5) . ?
C31 H31 0.86(5) . ?
C32 C33 1.398(5) . ?
C33 C34 1.397(6) . ?
C34 C35 1.397(6) . ?
C34 H34 0.88(5) . ?
C35 C36 1.398(6) . ?
C35 H35 0.91(5) . ?
C36 C37 1.517(6) . ?
C37 C39 1.536(6) . ?
C37 C38 1.538(7) . ?
C38 H38A 0.92(6) . ?
C38 H38B 0.97(6) . ?
C38 H38C 0.99(5) . ?
C39 H39A 0.98(5) . ?
C39 H39B 1.05(5) . ?
C39 H39C 0.94(5) . ?
 
loop_
 _geom_angle_atom_site_label_1
 _geom_angle_atom_site_label_2
 _geom_angle_atom_site_label_3
 _geom_angle
 _geom_angle_site_symmetry_1
 _geom_angle_site_symmetry_3
 _geom_angle_publ_flag
N4 Pd1 N1 83.35(14) . . ?
N4 Pd1 N3 78.15(13) . . ?
N1 Pd1 N3 161.05(13) . . ?
N4 Pd1 N2 159.76(13) . . ?
N1 Pd1 N2 78.30(13) . . ?
N3 Pd1 N2 119.25(12) . . ?
C20 O1 C17 106.4(3) . . ?
C1 N1 C4 108.6(3) . . ?
C1 N1 Pd1 133.7(3) . . ?
C4 N1 Pd1 116.3(3) . . ?
C5 N2 C8 103.9(3) . . ?
C5 N2 Pd1 104.9(3) . . ?
C8 N2 Pd1 150.8(3) . . ?
C32 N3 C29 104.0(3) . . ?
C32 N3 Pd1 105.2(2) . . ?
C29 N3 Pd1 150.6(3) . . ?
C36 N4 C33 108.7(3) . . ?
C36 N4 Pd1 134.1(3) . . ?
C33 N4 Pd1 115.5(3) . . ?
N1 C1 C2 107.8(4) . . ?
N1 C1 C37 121.7(4) . . ?
C2 C1 C37 130.3(4) . . ?
C3 C2 C1 108.3(4) . . ?
C3 C2 H2 129(3) . . ?
C1 C2 H2 122(3) . . ?
C2 C3 C4 105.6(4) . . ?
C2 C3 H3 130(3) . . ?
C4 C3 H3 124(3) . . ?
N1 C4 C3 109.6(4) . . ?
N1 C4 C5 116.3(4) . . ?
C3 C4 C5 133.9(4) . . ?
N2 C5 C4 120.5(4) . . ?
N2 C5 C6 112.7(4) . . ?
C4 C5 C6 126.7(4) . . ?
C7 C6 C5 106.4(4) . . ?
C7 C6 H6 132(3) . . ?
C5 C6 H6 122(3) . . ?
C6 C7 C8 108.3(4) . . ?
C6 C7 H7 129(3) . . ?
C8 C7 H7 123(3) . . ?
C9 C8 N2 130.2(4) . . ?
C9 C8 C7 121.0(4) . . ?
N2 C8 C7 108.6(4) . . ?
C8 C9 C17 127.7(4) . . ?
C8 C9 C10 117.6(4) . . ?
C17 C9 C10 114.7(4) . . ?
C11 C10 C15 118.1(4) . . ?
C11 C10 C9 121.2(4) . . ?
C15 C10 C9 120.7(4) . . ?
C10 C11 C12 121.6(4) . . ?
C10 C11 H11 122(3) . . ?
C12 C11 H11 117(3) . . ?
C11 C12 C13 120.3(4) . . ?
C11 C12 H12 121(3) . . ?
C13 C12 H12 118(3) . . ?
C14 C13 C12 118.4(4) . . ?
C14 C13 C16 121.4(4) . . ?
C12 C13 C16 120.2(4) . . ?
C13 C14 C15 121.3(4) . . ?
C13 C14 H14 116(3) . . ?
C15 C14 H14 122(3) . . ?
C14 C15 C10 120.3(4) . . ?
C14 C15 H15 122(3) . . ?
C10 C15 H15 118(3) . . ?
C13 C16 H16A 108(3) . . ?
C13 C16 H16B 114(3) . . ?
H16A C16 H16B 110(4) . . ?
C13 C16 H16C 112(4) . . ?
H16A C16 H16C 105(5) . . ?
H16B C16 H16C 107(5) . . ?
O1 C17 C18 109.4(3) . . ?
O1 C17 C9 119.2(4) . . ?
C18 C17 C9 131.3(4) . . ?
C17 C18 C19 107.0(4) . . ?
C17 C18 H18 122(3) . . ?
C19 C18 H18 131(3) . . ?
C20 C19 C18 107.1(4) . . ?
C20 C19 H19 126(3) . . ?
C18 C19 H19 126(3) . . ?
C19 C20 O1 110.1(4) . . ?
C19 C20 C21 130.8(4) . . ?
O1 C20 C21 118.6(4) . . ?
C29 C21 C20 127.3(4) . . ?
C29 C21 C22 119.0(4) . . ?
C20 C21 C22 113.7(3) . . ?
C23 C22 C27 118.3(4) . . ?
C23 C22 C21 121.1(4) . . ?
C27 C22 C21 120.6(4) . . ?
C22 C23 C24 120.7(4) . . ?
C22 C23 H23 122(3) . . ?
C24 C23 H23 117(3) . . ?
C25 C24 C23 120.8(4) . . ?
C25 C24 H24 121(3) . . ?
C23 C24 H24 118(3) . . ?
C26 C25 C24 118.6(4) . . ?
C26 C25 C28 120.0(4) . . ?
C24 C25 C28 121.5(4) . . ?
C25 C26 C27 120.6(4) . . ?
C25 C26 H26 122(3) . . ?
C27 C26 H26 118(3) . . ?
C22 C27 C26 121.0(4) . . ?
C22 C27 H27 119(3) . . ?
C26 C27 H27 120(3) . . ?
C25 C28 H28A 113(3) . . ?
C25 C28 H28B 112(3) . . ?
H28A C28 H28B 100(4) . . ?
C25 C28 H28C 111(3) . . ?
H28A C28 H28C 106(4) . . ?
H28B C28 H28C 114(4) . . ?
C21 C29 N3 130.4(4) . . ?
C21 C29 C30 120.9(4) . . ?
N3 C29 C30 108.5(3) . . ?
C31 C30 C29 108.5(4) . . ?
C31 C30 H30 132(3) . . ?
C29 C30 H30 120(3) . . ?
C30 C31 C32 105.6(4) . . ?
C30 C31 H31 133(3) . . ?
C32 C31 H31 121(3) . . ?
N3 C32 C33 120.5(4) . . ?
N3 C32 C31 113.2(4) . . ?
C33 C32 C31 125.2(4) . . ?
N4 C33 C34 108.7(4) . . ?
N4 C33 C32 115.4(3) . . ?
C34 C33 C32 134.9(4) . . ?
C33 C34 C35 106.4(4) . . ?
C33 C34 H34 127(3) . . ?
C35 C34 H34 127(3) . . ?
C34 C35 C36 107.6(4) . . ?
C34 C35 H35 127(3) . . ?
C36 C35 H35 126(3) . . ?
N4 C36 C35 108.6(4) . . ?
N4 C36 C37 120.5(4) . . ?
C35 C36 C37 130.8(4) . . ?
C1 C37 C36 108.6(3) . . ?
C1 C37 C39 111.4(4) . . ?
C36 C37 C39 109.9(4) . . ?
C1 C37 C38 109.2(4) . . ?
C36 C37 C38 108.1(4) . . ?
C39 C37 C38 109.7(4) . . ?
C37 C38 H38A 111(3) . . ?
C37 C38 H38B 114(4) . . ?
H38A C38 H38B 111(5) . . ?
C37 C38 H38C 112(3) . . ?
H38A C38 H38C 102(4) . . ?
H38B C38 H38C 107(4) . . ?
C37 C39 H39A 113(3) . . ?
C37 C39 H39B 111(3) . . ?
H39A C39 H39B 114(4) . . ?
C37 C39 H39C 109(3) . . ?
H39A C39 H39C 104(4) . . ?
H39B C39 H39C 106(4) . . ?
 
loop_
 _geom_torsion_atom_site_label_1
 _geom_torsion_atom_site_label_2
 _geom_torsion_atom_site_label_3
 _geom_torsion_atom_site_label_4
 _geom_torsion
 _geom_torsion_site_symmetry_1
 _geom_torsion_site_symmetry_2
 _geom_torsion_site_symmetry_3
 _geom_torsion_site_symmetry_4
 _geom_torsion_publ_flag
C4 N1 C1 C2 -1.7(5) . . . . ?
Pd1 N1 C1 C2 -166.9(3) . . . . ?
C4 N1 C1 C37 -177.7(4) . . . . ?
Pd1 N1 C1 C37 17.1(6) . . . . ?
N1 C1 C2 C3 1.8(5) . . . . ?
C37 C1 C2 C3 177.3(5) . . . . ?
C1 C2 C3 C4 -1.1(5) . . . . ?
C1 N1 C4 C3 1.0(5) . . . . ?
Pd1 N1 C4 C3 169.1(3) . . . . ?
C1 N1 C4 C5 176.9(4) . . . . ?
Pd1 N1 C4 C5 -15.0(5) . . . . ?
C2 C3 C4 N1 0.1(5) . . . . ?
C2 C3 C4 C5 -174.8(5) . . . . ?
C8 N2 C5 C4 -171.6(4) . . . . ?
Pd1 N2 C5 C4 13.4(5) . . . . ?
C8 N2 C5 C6 4.4(5) . . . . ?
Pd1 N2 C5 C6 -170.5(3) . . . . ?
N1 C4 C5 N2 -1.1(6) . . . . ?
C3 C4 C5 N2 173.6(5) . . . . ?
N1 C4 C5 C6 -176.5(4) . . . . ?
C3 C4 C5 C6 -1.9(9) . . . . ?
N2 C5 C6 C7 -2.9(6) . . . . ?
C4 C5 C6 C7 172.9(5) . . . . ?
C5 C6 C7 C8 -0.1(6) . . . . ?
C5 N2 C8 C9 170.5(4) . . . . ?
Pd1 N2 C8 C9 -19.5(9) . . . . ?
C5 N2 C8 C7 -4.3(4) . . . . ?
Pd1 N2 C8 C7 165.7(4) . . . . ?
C6 C7 C8 C9 -172.6(4) . . . . ?
C6 C7 C8 N2 2.7(5) . . . . ?
N2 C8 C9 C17 8.7(7) . . . . ?
C7 C8 C9 C17 -177.1(4) . . . . ?
N2 C8 C9 C10 -170.0(4) . . . . ?
C7 C8 C9 C10 4.2(6) . . . . ?
C8 C9 C10 C11 73.0(6) . . . . ?
C17 C9 C10 C11 -105.9(5) . . . . ?
C8 C9 C10 C15 -107.8(5) . . . . ?
C17 C9 C10 C15 73.3(5) . . . . ?
C15 C10 C11 C12 0.9(7) . . . . ?
C9 C10 C11 C12 -179.9(4) . . . . ?
C10 C11 C12 C13 -0.2(7) . . . . ?
C11 C12 C13 C14 0.5(7) . . . . ?
C11 C12 C13 C16 -178.8(4) . . . . ?
C12 C13 C14 C15 -1.5(7) . . . . ?
C16 C13 C14 C15 177.8(4) . . . . ?
C13 C14 C15 C10 2.2(7) . . . . ?
C11 C10 C15 C14 -1.9(7) . . . . ?
C9 C10 C15 C14 178.9(4) . . . . ?
C20 O1 C17 C18 -1.6(4) . . . . ?
C20 O1 C17 C9 175.2(4) . . . . ?
C8 C9 C17 O1 14.4(6) . . . . ?
C10 C9 C17 O1 -166.8(3) . . . . ?
C8 C9 C17 C18 -169.6(4) . . . . ?
C10 C9 C17 C18 9.2(7) . . . . ?
O1 C17 C18 C19 0.5(5) . . . . ?
C9 C17 C18 C19 -175.8(4) . . . . ?
C17 C18 C19 C20 0.8(5) . . . . ?
C18 C19 C20 O1 -1.8(5) . . . . ?
C18 C19 C20 C21 169.3(4) . . . . ?
C17 O1 C20 C19 2.1(4) . . . . ?
C17 O1 C20 C21 -170.2(3) . . . . ?
C19 C20 C21 C29 -179.3(4) . . . . ?
O1 C20 C21 C29 -8.8(6) . . . . ?
C19 C20 C21 C22 -0.7(6) . . . . ?
O1 C20 C21 C22 169.8(3) . . . . ?
C29 C21 C22 C23 80.2(5) . . . . ?
C20 C21 C22 C23 -98.5(5) . . . . ?
C29 C21 C22 C27 -100.6(5) . . . . ?
C20 C21 C22 C27 80.7(5) . . . . ?
C27 C22 C23 C24 1.6(7) . . . . ?
C21 C22 C23 C24 -179.1(4) . . . . ?
C22 C23 C24 C25 -1.6(7) . . . . ?
C23 C24 C25 C26 0.2(7) . . . . ?
C23 C24 C25 C28 -180.0(4) . . . . ?
C24 C25 C26 C27 1.2(7) . . . . ?
C28 C25 C26 C27 -178.7(5) . . . . ?
C23 C22 C27 C26 -0.3(7) . . . . ?
C21 C22 C27 C26 -179.5(4) . . . . ?
C25 C26 C27 C22 -1.1(8) . . . . ?
C20 C21 C29 N3 -13.1(7) . . . . ?
C22 C21 C29 N3 168.4(4) . . . . ?
C20 C21 C29 C30 171.4(4) . . . . ?
C22 C21 C29 C30 -7.1(6) . . . . ?
C32 N3 C29 C21 -173.9(4) . . . . ?
Pd1 N3 C29 C21 -1.0(8) . . . . ?
C32 N3 C29 C30 2.0(4) . . . . ?
Pd1 N3 C29 C30 174.9(4) . . . . ?
C21 C29 C30 C31 177.0(4) . . . . ?
N3 C29 C30 C31 0.6(4) . . . . ?
C29 C30 C31 C32 -2.8(4) . . . . ?
C29 N3 C32 C33 165.0(3) . . . . ?
Pd1 N3 C32 C33 -11.4(4) . . . . ?
C29 N3 C32 C31 -3.8(4) . . . . ?
Pd1 N3 C32 C31 179.8(3) . . . . ?
C30 C31 C32 N3 4.3(5) . . . . ?
C30 C31 C32 C33 -163.9(4) . . . . ?
C36 N4 C33 C34 -0.6(4) . . . . ?
Pd1 N4 C33 C34 -168.1(3) . . . . ?
C36 N4 C33 C32 -171.1(3) . . . . ?
Pd1 N4 C33 C32 21.4(4) . . . . ?
N3 C32 C33 N4 -4.5(5) . . . . ?
C31 C32 C33 N4 162.9(4) . . . . ?
N3 C32 C33 C34 -171.8(4) . . . . ?
C31 C32 C33 C34 -4.4(7) . . . . ?
N4 C33 C34 C35 0.0(5) . . . . ?
C32 C33 C34 C35 167.9(4) . . . . ?
C33 C34 C35 C36 0.6(5) . . . . ?
C33 N4 C36 C35 0.9(4) . . . . ?
Pd1 N4 C36 C35 165.1(3) . . . . ?
C33 N4 C36 C37 176.7(3) . . . . ?
Pd1 N4 C36 C37 -19.1(6) . . . . ?
C34 C35 C36 N4 -1.0(5) . . . . ?
C34 C35 C36 C37 -176.1(4) . . . . ?
N1 C1 C37 C36 -45.3(5) . . . . ?
C2 C1 C37 C36 139.7(5) . . . . ?
N1 C1 C37 C39 -166.4(4) . . . . ?
C2 C1 C37 C39 18.6(7) . . . . ?
N1 C1 C37 C38 72.3(5) . . . . ?
C2 C1 C37 C38 -102.7(5) . . . . ?
N4 C36 C37 C1 46.1(5) . . . . ?
C35 C36 C37 C1 -139.2(5) . . . . ?
N4 C36 C37 C39 168.1(4) . . . . ?
C35 C36 C37 C39 -17.2(6) . . . . ?
N4 C36 C37 C38 -72.2(5) . . . . ?
C35 C36 C37 C38 102.5(5) . . . . ?
 
_refine_diff_density_max    0.834
_refine_diff_density_min   -1.241
_refine_diff_density_rms    0.117

_shelxl_version_number 2013-2

_shelx_res_file
;
TITL MR-TC-Pd-CALIX_1
CELL  0.71075 11.35200 10.91400 24.89300 90.000 90.047 90.000
ZERR  4 0.00400 0.00400 0.00900 0.000 0.005 0.000
LATT 1
SYMM .50-X, .50+Y, .50-Z
SFAC C H N O PD
UNIT 156 120 16 4 4
SHEL 99999.000000 0.000000
L.S. 20
FMAP 2
PLAN -25
WPDB -2
HTAB
BOND $H
CONF
LIST 4
TEMP 20.0
ACTA
SIZE 0.200 0.200 0.200
WGHT    0.000000   10.788900
FVAR       0.43187
PD1   5    0.570031    0.705913    0.421710    11.00000    0.01568    0.01816 =
         0.01586    0.00113    0.00099   -0.00134
O1    4    0.476879    0.802531    0.539442    11.00000    0.01797    0.02004 =
         0.01895   -0.00205    0.00041   -0.00407
N1    3    0.690547    0.752205    0.367890    11.00000    0.01608    0.02014 =
         0.02017   -0.00076    0.00579   -0.00215
N2    3    0.687249    0.833534    0.470042    11.00000    0.01890    0.02169 =
         0.02045    0.00257    0.00072   -0.00258
N3    3    0.425532    0.601168    0.464001    11.00000    0.01252    0.02081 =
         0.01481    0.00162    0.00026   -0.00098
N4    3    0.520699    0.588674    0.365814    11.00000    0.01513    0.02117 =
         0.01797   -0.00170    0.00112    0.00006
C1    1    0.707139    0.724027    0.315668    11.00000    0.02813    0.02022 =
         0.02117    0.00195    0.00545    0.00279
C2    1    0.821701    0.761334    0.301427    11.00000    0.02675    0.03148 =
         0.02600   -0.00183    0.01311   -0.00257
H2    2    0.851605    0.750781    0.267146    11.00000    0.03803
C3    1    0.875546    0.809429    0.346539    11.00000    0.02325    0.03399 =
         0.03120   -0.00099    0.00917   -0.00605
H3    2    0.950493    0.840728    0.351177    11.00000    0.03670
C4    1    0.791313    0.802670    0.387456    11.00000    0.01839    0.02710 =
         0.02610   -0.00267    0.00480   -0.00436
C5    1    0.787745    0.843369    0.440815    11.00000    0.02100    0.02089 =
         0.02611    0.00287    0.00200   -0.00591
C6    1    0.879902    0.905026    0.469338    11.00000    0.01767    0.03737 =
         0.04066   -0.00188    0.00509   -0.01096
H6    2    0.950207    0.911654    0.456207    11.00000    0.03250
C7    1    0.834223    0.939226    0.516244    11.00000    0.02173    0.03318 =
         0.03350    0.00127   -0.00093   -0.01135
H7    2    0.869288    0.977055    0.543543    11.00000    0.03984
C8    1    0.712412    0.899627    0.517917    11.00000    0.02399    0.01621 =
         0.02223    0.00295   -0.00232   -0.00679
C9    1    0.639278    0.934529    0.559204    11.00000    0.02357    0.01547 =
         0.02016    0.00396   -0.00236   -0.00405
C10   1    0.687711    1.021966    0.600204    11.00000    0.02167    0.02360 =
         0.02114    0.00135   -0.00380   -0.00275
C11   1    0.705114    1.144367    0.588147    11.00000    0.03673    0.02111 =
         0.02428    0.00321   -0.01000   -0.00525
H11   2    0.687568    1.177189    0.553516    11.00000    0.02308
C12   1    0.749950    1.225480    0.625691    11.00000    0.03397    0.01484 =
         0.03191    0.00026   -0.00709   -0.00600
H12   2    0.763387    1.306038    0.617153    11.00000    0.03586
C13   1    0.778552    1.185270    0.677203    11.00000    0.01815    0.02332 =
         0.02225   -0.00321   -0.00067    0.00016
C14   1    0.761784    1.062824    0.689475    11.00000    0.03060    0.02828 =
         0.01581    0.00206   -0.00139   -0.00393
H14   2    0.776486    1.039829    0.724656    11.00000    0.01382
C15   1    0.715154    0.981892    0.652106    11.00000    0.03637    0.02265 =
         0.02211    0.00597   -0.00555   -0.00824
H15   2    0.701720    0.900261    0.660464    11.00000    0.03747
C16   1    0.825001    1.274202    0.718268    11.00000    0.03695    0.02570 =
         0.02637   -0.00422   -0.00503   -0.00004
H16A  2    0.768528    1.337263    0.722746    11.00000    0.03407
H16B  2    0.900220    1.308422    0.709119    11.00000    0.05424
H16C  2    0.832644    1.239969    0.751206    11.00000    0.06276
C17   1    0.521978    0.899842    0.567585    11.00000    0.02156    0.01432 =
         0.02466   -0.00025   -0.00173   -0.00472
C18   1    0.437701    0.943090    0.603076    11.00000    0.02763    0.02015 =
         0.02068   -0.00286   -0.00068    0.00012
H18   2    0.453156    1.004947    0.626981    11.00000    0.02578
C19   1    0.338714    0.869759    0.596840    11.00000    0.02262    0.02152 =
         0.02200   -0.00411    0.00279    0.00052
H19   2    0.268070    0.878094    0.614690    11.00000    0.03366
C20   1    0.365267    0.783613    0.558707    11.00000    0.01789    0.02082 =
         0.01880    0.00446    0.00123   -0.00063
C21   1    0.304101    0.676217    0.542743    11.00000    0.01706    0.02313 =
         0.01655    0.00306    0.00032   -0.00063
C22   1    0.192626    0.654208    0.573591    11.00000    0.01749    0.02201 =
         0.01818    0.00056   -0.00058   -0.00143
C23   1    0.189810    0.573404    0.616333    11.00000    0.02263    0.02732 =
         0.02281    0.00371   -0.00028    0.00458
H23   2    0.253191    0.536727    0.628132    11.00000    0.03039
C24   1    0.085261    0.552256    0.644363    11.00000    0.03441    0.02184 =
         0.01976    0.00485    0.00426   -0.00160
H24   2    0.086513    0.494747    0.672888    11.00000    0.03016
C25   1   -0.017235    0.613957    0.630841    11.00000    0.02201    0.02681 =
         0.02184   -0.00356    0.00267   -0.00469
C26   1   -0.013929    0.696691    0.588934    11.00000    0.02120    0.04170 =
         0.03305    0.01105    0.00368   -0.00136
H26   2   -0.084810    0.741821    0.577301    11.00000    0.05736
C27   1    0.089795    0.715874    0.560251    11.00000    0.02552    0.03591 =
         0.02706    0.01402    0.00008   -0.00442
H27   2    0.091622    0.774564    0.532192    11.00000    0.03296
C28   1   -0.130761    0.592275    0.660706    11.00000    0.02527    0.03539 =
         0.02941   -0.00051    0.00369   -0.00723
H28A  2   -0.181984    0.535703    0.642467    11.00000    0.04519
H28B  2   -0.117512    0.548351    0.694025    11.00000    0.04028
H28C  2   -0.177746    0.672954    0.664995    11.00000    0.05663
C29   1    0.337185    0.593476    0.504399    11.00000    0.01794    0.01759 =
         0.01564    0.00494   -0.00080   -0.00004
C30   1    0.273402    0.478347    0.497561    11.00000    0.01958    0.02179 =
         0.01770    0.00433    0.00103   -0.00231
H30   2    0.213130    0.458251    0.520809    11.00000    0.03539
C31   1    0.320087    0.418064    0.455965    11.00000    0.02328    0.02106 =
         0.02000    0.00217   -0.00244   -0.00573
H31   2    0.304467    0.348672    0.441265    11.00000    0.03259
C32   1    0.410186    0.498097    0.434619    11.00000    0.01525    0.01784 =
         0.01943    0.00182   -0.00363   -0.00181
C33   1    0.462306    0.486517    0.384005    11.00000    0.01647    0.01876 =
         0.02122   -0.00011   -0.00294   -0.00282
C34   1    0.454631    0.401735    0.342114    11.00000    0.01835    0.02731 =
         0.02878   -0.00488   -0.00008   -0.00258
H34   2    0.424301    0.327689    0.343889    11.00000    0.02373
C35   1    0.510110    0.455523    0.297917    11.00000    0.02494    0.03318 =
         0.02111   -0.00714    0.00079   -0.00143
H35   2    0.518301    0.422447    0.264739    11.00000    0.04842
C36   1    0.551118    0.570609    0.313933    11.00000    0.02016    0.02692 =
         0.01822    0.00038    0.00000    0.00219
C37   1    0.611285    0.671408    0.282200    11.00000    0.02358    0.03530 =
         0.01583   -0.00145    0.00460    0.00234
C38   1    0.519575    0.771502    0.270295    11.00000    0.03391    0.04204 =
         0.02804    0.01102   -0.00348    0.00281
H38A  2    0.554527    0.840238    0.255845    11.00000    0.04437
H38B  2    0.454930    0.743590    0.247710    11.00000    0.06144
H38C  2    0.483975    0.804708    0.303563    11.00000    0.04387
C39   1    0.659248    0.619488    0.229219    11.00000    0.04097    0.04942 =
         0.02322   -0.00456    0.01170   -0.00647
H39A  2    0.721094    0.557562    0.234679    11.00000    0.03184
H39B  2    0.590652    0.589834    0.204267    11.00000    0.03343
H39C  2    0.697198    0.683049    0.210172    11.00000    0.02981
HKLF 4

REM  MR-TC-Pd-CALIX_1
REM R1 =  0.0705 for    7241 Fo > 4sig(Fo)  and  0.0831 for all    8280 data
REM    526 parameters refined using      0 restraints

END

WGHT      0.0000     10.8192

REM Instructions for potential hydrogen bonds

REM No hydrogen bonds found for HTAB generation

REM Highest difference peak  0.834,  deepest hole -1.241,  1-sigma level  0.117
Q1    1   0.5663  0.8861  0.4216  11.00000  0.05    0.83
Q2    1   0.4740  0.6577  0.4480  11.00000  0.05    0.68
Q3    1   0.5027  0.6598  0.3835  11.00000  0.05    0.67
Q4    1   0.7950  0.7909  0.2332  11.00000  0.05    0.62
Q5    1   0.6419  0.7518  0.4580  11.00000  0.05    0.60
Q6    1   0.6603  0.7432  0.3906  11.00000  0.05    0.57
Q7    1   0.4859  0.7294  0.4541  11.00000  0.05    0.54
Q8    1   0.5981  0.9983  0.6679  11.00000  0.05    0.53
Q9    1   0.5406  0.7967  0.4220  11.00000  0.05    0.52
Q10   1   0.4782  0.7551  0.4021  11.00000  0.05    0.52
Q11   1   0.5026  0.2426  0.0501  11.00000  0.05    0.52
Q12   1   0.8006  0.8116  0.4114  11.00000  0.05    0.51
Q13   1   0.5045  0.6146  0.4316  11.00000  0.05    0.50
Q14   1   0.5632  0.6088  0.4207  11.00000  0.05    0.50
Q15   1   0.6548  0.6468  0.4382  11.00000  0.05    0.50
Q16   1   0.3373  0.4573  0.4382  11.00000  0.05    0.49
Q17   1   0.4013  0.5964  0.4869  11.00000  0.05    0.44
Q18   1   0.6044  0.6109  0.4370  11.00000  0.05    0.43
Q19   1   0.7595  0.7778  0.3012  11.00000  0.05    0.43
Q20   1   0.0905  0.6480  0.5503  11.00000  0.05    0.43
Q21   1   0.5694  0.7757  0.4660  11.00000  0.05    0.42
Q22   1   0.6344  0.6213  0.4123  11.00000  0.05    0.41
Q23   1   0.4990  0.7813  0.4901  11.00000  0.05    0.41
Q24   1   0.4381  0.4408  0.3684  11.00000  0.05    0.41
Q25   1   0.7155  0.7845  0.5787  11.00000  0.05    0.41
;
_shelx_res_checksum   86052

_shelx_hkl_file
;
   1   0  -3  634.92   29.68
   1   0  -3  574.85   25.27
   1   0   3 3695.80   87.20
  -1   0  -3 3720.07   87.69
   1   0   3 3720.88   87.74
   1   0   3 3605.95   84.19
   1  -1  -2  773.08   34.03
   1   1  -2  776.22   35.84
  -1  -1   2  691.10   29.97
   1   1  -2  678.01   31.11
  -1  -1  -2  708.34   32.04
   1  -1   2  650.15   28.72
   1   1   2  689.47   30.99
   1  -1   2  689.17   31.84
   1   1   2  716.85   32.02
   0  -1   3  872.06   38.87
   0   1   3  826.44   36.81
   0   1   3  879.68   40.14
   0  -1  -3  854.32   39.07
   0   0   4 3158.93   75.03
   1   1  -3 2216.96   56.47
   1   1  -3 2125.42   52.27
   1   1   3 2931.65   70.65
  -1  -1  -3 2932.54   70.96
   1  -1   3 2833.91   67.37
   1   1   3 2888.06   68.70
   2   0   0   19.42    4.35
  -2   0   0   10.08    4.95
   2   0  -1    3.17    1.91
  -2   0   1    1.84    3.86
   2   0   1    2.34    2.40
  -2   0  -1    5.80    2.94
   2   0   1   -0.38    1.06
   1   0  -4    3.08    1.42
   1   0  -4   -3.66    4.19
   1   0   4    3.11    3.02
   1   0   4    5.20    2.69
  -1   0  -4    2.39    2.00
   0   1   4  348.71   28.23
   0   1   4  351.02   33.40
   0  -1  -4  317.60   24.54
   0  -1  -4  349.90   29.17
   0  -1   4  416.61   12.03
   0   2  -1   81.65   10.49
   0  -2  -1  120.61   13.69
   2   0  -2  331.89   26.69
   2   0  -2  329.85   26.79
   2   0  -2  338.33   27.83
  -2   0  -2  467.30   24.14
   2   0   2  416.87   11.14
   2   0   2  435.64    8.22
   2  -1   0 3166.78   75.08
   2   1   0 3043.50   73.31
  -2  -1   0 3184.00   76.61
   0  -2   2   19.21    5.24
   0  -2  -2   24.57    6.70
   0   2  -2   13.80    6.95
   0   2   2   24.60    8.11
   0   0   5   -2.64    4.86
   2   1  -1  643.68   29.91
   2  -1  -1  654.51   30.60
   2  -1  -1  683.59   30.01
  -2  -1   1  718.81   33.96
   2  -1  -1  664.60   30.99
   2   1   1 4285.98  101.38
  -2   1  -1 4414.05  106.32
   2  -1   1 4254.29  100.67
  -2  -1  -1 4285.26  101.37
   1   2   0   13.03    4.79
  -1  -2   0    9.16    2.58
   1   1  -4 1059.72   49.48
   1   1  -4 1130.99   49.86
   1  -1   4  496.75   24.36
   1  -1   4  496.66   26.57
   1   1   4  461.06   24.36
   1   1   4  508.09   25.41
   1  -1   4  532.56   25.23
  -1  -1  -4  518.98   26.30
  -1  -2   1  759.48   33.28
   1   2  -1  775.66   34.07
   1  -2  -1  771.60   35.40
  -1   2   1  771.92   33.22
   1   2  -1  784.98   36.61
  -1  -2  -1 4926.41  117.20
   2   0  -3    3.51    6.89
  -2   0   3    9.26    4.92
   2   0  -3    2.57    2.64
   2   0  -3    6.20    2.97
  -2   0  -3    2.69    3.25
   2   0   3    5.42    3.82
   2   0   3    2.29    2.65
  -2   0  -3   10.33    5.13
   2   0   3    6.60    4.52
   2  -1  -2  596.92   27.17
  -2   1   2  568.60   26.95
   2   1  -2  577.75   27.66
  -2   1   2  629.91   28.22
   2   1  -2  595.41   28.82
   2  -1  -2  555.93   25.17
   2  -1  -2  568.03   26.48
  -2  -1   2  621.16   29.02
  -2   1  -2  179.94   15.42
   2   1   2  158.07   14.13
   2  -1   2  190.66   17.06
   2   1   2  191.74   19.87
  -2  -1  -2  216.08   22.22
   2  -1   2  176.45   15.40
   1  -2  -2 1370.40   59.25
   1  -2  -2 1400.57   63.59
   1   2  -2 1383.59   61.22
  -1   2   2 1418.85   61.53
  -1  -2   2 1319.35   56.17
  -1   2   2 1416.23   61.15
   1   2  -2 1417.62   60.31
   1  -2   218879.20  427.76
   1  -2   219559.41  444.86
   1   0  -5 6994.94  160.82
   1   0  -5 7042.71  166.29
   0  -2  -3    2.44    3.24
   0  -2   3    8.79    2.32
   0  -2   3    4.12    1.67
   0   2  -3    4.41    5.38
   0  -2   3    7.98    5.67
   0  -2  -3    4.58    2.96
   0   2   3   19.11    5.50
   0  -2  -3   16.64    5.47
  -1   0  -5   48.11   12.00
   1   0   5   59.43   12.98
   1   0   5   45.12   14.65
   1   0   5   40.03   10.12
   0  -1   5    9.66    3.77
   0   1   5    9.37    6.17
   0   1   5   -1.00    4.44
   0  -1   5    5.73    2.95
   0  -1  -5    3.66    4.63
   0   1   5    1.66    1.77
   0   1  -5    3.98    3.77
   0   1  -5   -0.39    2.26
   0   1   5    2.15    3.08
   0   1   5    1.91    1.39
   0  -1  -5    3.82    2.04
   2  -1  -3 1610.49   72.28
  -2  -1   3 1758.84   78.19
   2   1  -3 1728.44   76.90
   2  -1  -3 1558.05   67.96
  -2   1   3 1600.78   68.68
  -2  -1   3 1738.79   77.25
   2   1  -3 1620.57   70.58
   2   1  -3 1497.31   66.37
   2  -1  -3 1638.77   69.84
  -2   1   3 1641.25   70.09
  -2   1   3 1682.92   73.32
   2  -1   3 4779.67  113.40
   2   1   3 4700.41  111.22
  -2  -1  -3 4777.66  113.75
  -2  -1  -3 4817.40  115.20
   2   1   3 4710.64  110.16
  -2   1  -3 4827.98  113.19
   2  -1   3 4692.26  112.99
  -2   1  -3 4712.90  110.22
   2  -1   3 4580.65  106.65
  -2  -1  -3 4803.19  112.53
  -1  -2   3 1450.88   66.76
  -1   2   3 1379.08   59.14
   1  -2  -3 1390.99   61.56
   1   2  -3 1313.40   59.56
  -1  -2   3 1337.86   59.77
   1  -2  -3 1291.84   55.57
   1   2   3 7535.30  176.69
  -1  -2  -3 7467.84  172.94
  -1  -2  -3 7004.98  164.47
   1   2   3 7199.35  168.40
  -1  -2  -3 7350.00  171.52
  -1  -2  -3 7838.99  184.09
   1  -2   3 7183.96  166.37
   1  -2   3 7228.63  166.71
  -1   1   5 1060.20   48.30
   1   1  -5  955.84   43.70
  -1   1   5 1090.86   46.51
   1   1  -5 1142.42   52.54
  -1  -1   5 1036.40   48.63
   1   1  -5 1023.17   44.87
   1  -1  -5 1037.73   48.40
  -1  -1   5 1136.88   52.04
   1   1  -5 1072.76   52.45
   1   1   5  908.51   47.56
  -1  -1  -5  946.03   43.98
  -1  -1  -5  904.97   41.98
  -1  -1  -5  861.73   39.42
   1   1   5  929.18   49.38
   1  -1   5  853.76   39.43
   1   1   5  823.29   40.74
   1  -1   5  877.32   40.11
  -1   1  -5  838.26   43.30
  -1  -1  -5  872.12   43.25
   1  -1   5  919.41   41.23
  -1  -1  -5  947.64   43.88
  -2   0   4 1617.00   72.87
   2   0  -4 1519.17   67.65
   2   0  -4 1503.03   65.96
   2   0  -4 1490.77   64.28
  -2   0   4 1514.89   65.13
   2   0   4  535.95   31.78
  -2   0  -4  550.09   27.63
   2   0   4  480.42   24.06
   2   0   4  463.90   25.75
  -2   0  -4  515.08   26.77
  -2   0  -4  531.09   25.48
  -2   0  -4  544.45   27.19
   0   0   6 4164.57   99.73
   0   0  -6 4118.17   98.75
   0   0   6 3835.58   94.23
   0  -2   4   56.88   14.78
   0   2   4   25.32    8.46
   0   2   4   44.34    6.30
   0   2   4   40.29   16.89
   0  -2  -4   64.97   21.01
   0  -2  -4   51.63   10.14
   0  -2  -4   67.78   14.90
   0  -2  -4   57.62    6.72
   0  -2   4   62.48    8.85
   0  -2   4   48.85   10.66
   0   2  -4   54.34    6.92
   0   2  -4   37.97    9.82
  -2   2   0   80.58   19.04
   2  -2   0   64.65   14.74
   2   2   0   44.98   13.45
  -2  -2   0   70.38   15.36
  -2  -2   0   78.07   13.10
   2   2   0   78.68   13.52
   2  -2   0   59.86    7.33
   2   1  -4  903.80   42.45
   2  -1  -4  893.97   38.79
  -2   1   4  896.14   39.32
   2   1  -4  904.35   42.24
  -2  -1   4 1015.68   47.04
  -2   1   4  991.36   46.97
   2  -1  -4  941.55   42.66
  -2   1   4  931.82   42.36
  -2  -1   4  980.53   49.71
   2  -1  -4  904.23   43.79
  -2   1  -4 2194.28   55.47
  -2  -1  -4 2049.80   25.91
   2   1   4 2018.79   21.00
   2  -1   4 2092.45   51.89
   2  -1   4 2088.24   57.53
  -2   1  -4 2145.01   55.31
   2  -1   4 1997.00   87.14
  -2   1  -4 2083.46   52.75
  -2  -1  -4 2113.42   54.56
  -2  -1  -4 2147.93   55.85
   2   1   4 2196.35   61.30
   2  -1   4 2069.09   52.90
  -1   0   6    5.64    4.66
  -1   0   6   13.92    7.54
   1   0  -6    0.12    3.12
   1   0   6   -5.64   11.28
  -1   0  -6   -0.11    6.47
   1   0   6    3.45    2.74
   1   0   6   14.42    5.75
  -1   0  -6   17.89    6.28
   2   2  -1 4929.91  119.21
   2  -2  -1 4825.51  111.51
  -2  -2   1 5143.40  122.67
   2  -2  -1 5011.64  116.93
   2  -2  -1 5036.86  117.91
  -2   2   1 4962.67  118.22
   2   2  -1 5241.03  122.02
  -2  -2   1 5094.90  118.62
  -2  -2  -1  671.78   31.72
   2   2   1  658.26   31.79
  -2  -2  -1  669.21   31.60
   2   2   1  671.55   33.10
   2  -2   1  694.80   35.01
  -2  -2  -1  648.25   38.73
   2  -2   1  661.92   31.14
   0   1   6   86.18   22.83
   0  -1  -6   68.82   15.73
   0   1  -6   83.46   15.78
   0  -1   6   49.01   15.53
   0   1   6   60.93    9.26
   0   1  -6   87.82   21.38
   0  -1   6   65.92   10.12
   0  -1   6   57.58    7.30
   0   1   6   57.29   17.21
   0  -1  -6   57.12   15.49
   0   1   6   73.48   14.18
   0   1   6   81.97   10.29
   1  -2  -4  659.08   28.32
   1  -2  -4  663.84   29.01
  -1  -2   4  661.93   31.98
  -1  -2   4  748.43   36.33
   1   2  -4  731.08   34.85
  -1   2   4  743.00   32.36
   1  -2  -4  714.52   36.14
  -1  -2  -4 8260.82  192.40
   1   2   4 7718.26  179.73
  -1  -2  -4 7646.05  179.01
   1   2   4 7901.51  185.33
  -1  -2  -4 8083.76  186.89
  -1  -2  -4 7756.69  181.91
   1  -2   4 7425.02  171.65
  -1   2  -4 7828.45  180.52
   3   0   0    9.41    3.91
  -3   0   0   -0.53    4.93
  -3   0   0    1.99    1.00
   3   0   0   11.23    9.67
  -3   0   0    6.18    4.29
   2  -2  -2  356.09   28.47
  -2   2   2  411.25   10.96
   2  -2  -2  337.39   27.86
  -2  -2   2  387.58   13.26
  -2   2   2  393.92   11.37
   2  -2  -2  385.88   13.86
   2   2  -2  395.51    9.94
   2   2  -2  321.77   33.65
  -2  -2   2  378.89   31.73
  -2   2   2  372.73   29.48
  -2  -2  -211893.69  273.48
  -2   2  -211372.42  258.87
   2  -2   211362.38  262.68
  -2  -2  -211618.77  268.12
   2   2   212315.50  284.45
   2  -2   211551.81  266.69
  -2  -2  -211478.86  265.02
   2   2   211659.55  270.06
  -2   0   5    6.75    3.03
  -2   0   5    2.53    3.41
  -2   0   5   15.76   11.12
   2   0  -5    2.23    2.05
   2   0  -5    4.17    6.42
   2   0  -5    7.43    7.26
   3   0  -1 2464.11   62.02
  -3   0   1 2430.48   64.65
  -3   0   1 2596.76   59.60
  -3   0   1 2669.25   67.76
  -2   0  -5    7.19    6.41
  -2   0  -5   23.01   10.23
   2   0   5   -0.79    4.59
   2   0   5    7.28    5.25
   2   0   5    7.59    5.35
  -2   0  -5   19.05    9.47
  -2   0  -5    2.63    4.74
   2   0   5    1.37    3.50
  -3   0  -1 5068.30  115.64
   3   0   1 5285.31  126.50
  -3   0  -1 5433.09  130.43
   3   0   1 4993.19  113.93
  -3   0  -1 5097.32  122.26
   3   0   1 5141.31  122.20
   0  -2   5 2555.62   68.52
   0   2   5 2628.37   67.11
   0  -2   5 2593.55   61.29
   0   2   5 2491.35   63.77
   0  -2  -5 2623.73   66.26
   0  -2  -5 2534.82   64.68
   0  -2   5 2579.96   65.06
   0  -2  -5 2474.74   58.84
   0  -2  -5 2451.51   64.44
   0   2  -5 2513.07   59.29
   0   2   5 2473.14   59.09
   1  -1  -6  323.67   27.20
   1   1  -6  315.11   29.71
   1   1  -6  313.99   24.86
  -1  -1   6  335.53   28.03
   1   1  -6  292.70   28.38
  -1  -1   6  355.38   31.43
   1   1  -6  297.12   24.89
   1  -1   6   23.75    7.59
   1  -1   6   19.99    6.04
  -1  -1  -6   15.13   11.98
   1  -1   6   18.54    6.61
   1   1   6    8.08    5.20
   1   1   6    9.81    3.87
  -1  -1  -6   17.25    9.25
  -1   1  -6   17.00    6.91
  -1  -1  -6   21.65   12.30
  -1   1  -6    5.66    4.55
  -1  -1  -6   14.78    6.00
   1   1   6   10.58    5.21
  -1  -1  -6   -2.48    8.21
   0  -3   0    6.11    2.97
  -3   0   2    2.77    2.18
  -3   0   2   20.39    5.11
   3   0  -2    5.86    6.33
   3   0  -2    7.33    5.35
   3   0   2    4.91    3.41
  -3   0  -2    5.22    6.83
  -3   0  -2    3.82    4.75
  -3   0  -2    0.71    1.99
   3   0   2    7.61    6.64
   3   0   2   16.76    9.43
   0  -3  -1   94.05   20.65
   0  -3   1  116.48   16.80
   0  -3  -1   90.28   21.76
   3   1   0  344.35   28.13
  -3   1   0  356.72   32.13
   3  -1   0  339.05   32.75
  -3  -1   0  399.45   21.82
   3   1   0  402.86   16.33
  -3  -1   0  384.74   41.75
   3  -1   0  338.39   30.48
  -3   1   0  358.97   29.53
   3  -1   0  325.25   24.80
   0   0  -7   -0.42    5.08
   0   0   7   -0.55    5.59
  -2  -2   3 2415.69   61.90
   2  -2  -3 2274.02   58.63
   2   2  -3 2239.74   53.78
   2   2  -3 2196.36   56.76
   2  -2  -3 2256.55   56.70
  -2   2   3 2216.83   54.56
  -2   2   3 2283.20   57.37
  -2   2   3 2266.46   55.85
  -2  -2   3 2159.93   52.18
  -2  -2  -3 6854.99  162.39
  -2  -2  -3 7174.50  171.20
  -2  -2  -3 7253.24  169.47
   2   2   3 6994.52  165.76
  -2   2  -3 6935.61  159.68
   2  -2   3 6770.57  156.00
   2  -2   3 6763.64  159.76
   2  -2   3 6980.39  164.24
   2  -1  -5   53.75    8.48
  -2  -1   5   50.82   14.11
  -2  -1   5   57.20   12.44
  -2   1   5   49.21    6.04
   2   1  -5   30.28   13.19
   2  -1  -5   69.33   13.49
   2  -1  -5   58.80   11.80
  -2   1   5   62.37   15.20
  -2   1   5   61.00   14.61
   2   1  -5   34.87    6.75
   3  -1  -1 5688.12  136.26
   3   1  -1 5524.86  132.03
  -3   1   1 5068.04  119.60
  -3  -1   1 5607.61  133.45
  -3  -1   1 5223.03  125.44
   3  -1  -1 5122.88  120.72
   3   1  -1 5205.31  127.06
   3  -1  -1 5171.48  117.87
  -2   1  -5   10.95    5.25
  -2   1  -5   10.59    4.17
  -2  -1  -5    7.07    8.59
  -2   1  -5   13.62    4.79
  -2  -1  -5   11.31    9.19
   2  -1   5    9.70    4.87
   2   1   5    3.33    4.57
  -2  -1  -5    9.87    4.71
   2  -1   5   11.05    6.83
  -2  -1  -5    3.86    3.38
   2   1   5   19.62    6.22
   2  -1   5    9.85    4.28
  -3  -1  -1  573.48   26.85
   3   1   1  575.59   35.94
  -3  -1  -1  578.84   29.46
  -3  -1  -1  553.84   30.94
   3  -1   1  600.12   32.01
   3  -1   1  576.58   30.83
  -3   1  -1  597.98   31.50
  -3   1  -1  604.26   31.14
   3  -1   1  506.86   22.38
   3   1   1  566.11   29.27
  -1   2   5 2569.90   59.49
   1  -2  -5 2682.63   61.80
   1  -2  -5 2760.14   71.03
  -1  -2   5 2836.26   72.36
   1   2  -5 2667.43   67.74
   1   2  -5 2542.55   58.76
  -1  -2   5 2656.51   67.49
   1  -2   5  306.63   25.29
  -1  -2  -5  310.66   32.08
   1   2   5  266.62   26.86
  -1  -2  -5  258.63   35.16
  -1   2  -5  287.96   24.27
   1  -2   5  280.15   25.60
   1   2   5  260.51   29.98
   1   2   5  264.81   23.14
  -1  -2  -5  281.22   24.27
   0  -3  -211111.72  257.77
   0  -3  -210989.49  252.30
   0  -3   210992.93  256.18
   0   3  -210480.54  240.55
   0  -3  -210707.89  248.03
   0  -3  -210845.10  250.78
   0   3   210595.81  245.76
   1   3   0  395.09   10.45
   1  -3   0  374.90   32.26
   1  -3   0  389.88    8.27
  -1  -3   0  386.31   11.69
  -1  -3   0  381.28   35.60
   3   0  -3 9948.01  232.38
   3   0  -3 9942.74  227.07
   3   0  -3 9388.11  217.29
  -3   0   3 9582.10  218.80
   3   0  -3 9465.59  221.11
  -3   0   310101.34  233.56
  -3   0  -3   21.93    9.74
  -3   0  -3   37.99    7.68
   3   0   3   25.16   14.25
  -3   0  -3   18.68    7.40
   3   0   3   35.29    7.85
   3   0   3   38.49   16.38
   3  -1  -2   37.31    9.77
  -3   1   2   34.51    7.17
   3  -1  -2   42.00   11.00
  -3   1   2   23.61    7.86
   3  -1  -2   27.31    5.12
   3   1  -2    8.88    6.66
   3   1  -2   37.20    8.30
  -3  -1   2   20.84    6.98
  -3  -1   2   23.65    7.37
   3  -1  -2   27.53    7.94
  -3  -1  -2 1464.70   65.14
   3  -1   2 1437.78   61.56
   3   1   2 1396.96   63.93
   3  -1   2 1527.49   68.02
  -3   1  -2 1604.64   72.02
  -3   1  -2 1608.54   73.73
  -3  -1  -2 1431.98   65.41
  -3  -1  -2 1558.12   67.35
   3   1   2 1447.23   63.67
   3  -1   2 1614.99   73.55
  -1  -3   1  227.45   22.41
   1   3  -1  275.88   24.35
   1   3  -1  272.27   23.85
  -1  -3   1  279.92   23.29
  -1   3   1  314.91   29.08
   1  -3  -1  295.08   24.96
   1  -3  -1  279.15   21.99
  -1   3  -1   81.37    8.49
  -1  -3  -1   84.58   11.02
   1   3   1  135.93   25.44
   1  -3   1   77.61   20.18
  -1  -3  -1   83.34   16.82
  -1   0   7 3285.74   86.36
  -1   0   7 3331.77   80.16
   1   0  -7 3018.38   74.48
   1   0  -7 3198.39   80.95
   1   0   711065.42  257.99
  -1   0  -710757.96  249.66
   1   0   7 9910.99  231.14
   1   0   710692.74  247.36
   1   0   710075.95  233.59
   0   1   7  222.78   19.50
   0   1   7  168.44   15.80
   0   1  -7  205.23   22.96
   0   1  -7  206.13   22.27
   0   1   7  177.35   17.46
   0  -1   7  201.43   18.07
   0  -1   7  194.66   25.62
   0  -1   7  179.23   22.66
   0  -1  -7  223.52   21.40
   0   1   7  191.28   16.76
   0   1   7  163.66   15.98
  -2   0   6 4631.56  108.25
   2   0  -6 4426.55  104.27
  -2   0   6 4861.23  120.83
   2   0  -6 4491.74  111.30
   2   0  -6 4682.75  111.34
  -2   0  -6 3064.15   79.12
   2   0   6 3003.84   77.36
   2   0   6 2848.86   69.99
   2   0   6 2881.60   72.69
  -2   0  -6 3060.58   75.12
  -2   0  -6 2923.48   75.61
  -1   3   2   27.00   10.43
   1  -3  -2    9.84    2.86
   1   3  -2    9.85    7.22
  -1  -3   2   35.58   11.97
  -1  -3   2   24.12    4.73
  -1   3   2   21.96   10.01
   1  -3  -2   20.15    4.92
   1   3  -2   19.59    9.47
   1  -3   2    7.07    2.70
  -1  -3  -2   12.83    4.20
   1   3   2    7.75    3.33
  -1  -3  -2    3.13    4.82
  -1   3  -2    1.60    1.64
  -1  -3  -2    2.72    2.43
   0   3   3    4.08    2.91
   0   3  -3    2.85    5.07
   0   3   3    7.09    6.08
   0  -3  -3    4.98    4.94
   0  -3   3    6.38    3.66
   0  -3  -3    6.05    3.83
   0  -3   3    3.40    5.75
   0  -3  -3    5.50    2.74
   0  -3  -3    4.11    6.36
   0   3  -3    0.74    3.23
   2   2  -4 1055.00   48.43
  -2   2   4 1106.68   52.53
  -2  -2   4 1159.82   59.77
  -2   2   4 1053.15   48.39
  -2   2   4 1097.60   47.59
   2  -2  -4 1044.10   49.38
   2   2  -4 1054.36   45.85
  -2  -2   4 1006.04   54.37
   2  -2   4 7287.18  171.31
   2  -2   4 7222.26  169.24
  -2  -2  -4 7226.54  171.45
   2   2   4 7485.40  177.25
  -2  -2  -4 7225.03  173.30
   2  -2   4 7028.72  163.32
   2  -2   4 6832.68  162.09
  -2   2  -4 7153.78  166.40
  -2  -2  -4 6909.31  164.31
   2   2   4 6800.81  160.18
   0   2   6 7401.03  170.06
   0  -2  -6 7184.26  165.24
   0   2   6 7436.67  174.81
   0  -2  -6 7408.48  177.87
   0  -2  -6 7286.73  172.60
   0  -2   6 7796.54  184.36
   0   2  -6 7437.99  170.52
   0  -2   6 7417.14  170.74
   0   2   6 7434.05  176.63
   0  -2   6 7267.26  171.08
   0  -2   6 7830.20  185.02
  -3   1   3  327.30   27.58
   3  -1  -3  360.03   30.00
   3   1  -3  309.81   25.82
  -3  -1   3  354.49   37.32
  -3   1   3  359.59   29.73
   3   1  -3  350.21   29.28
  -3   1   3  341.40   28.98
   3  -1  -3  339.64   30.05
   3  -1  -3  300.03   32.02
   3   1  -3  347.58   34.39
  -3  -1   3  364.99   29.54
   3   1   3 2034.45   28.35
   3  -1   3 2026.76   28.06
  -3  -1  -3 1988.45   87.36
  -3   1  -3 1963.86   90.88
   3  -1   3 1811.89   81.34
  -3  -1  -3 2087.03   55.09
  -3   1  -3 1958.09   83.87
   3  -1   3 1821.47   78.09
  -3  -1  -3 1973.28   85.53
   3   1   3 1856.01   80.92
  -3   1  -3 1797.31   79.80
   1   1  -7 1497.46   74.60
   1   1  -7 1386.75   62.27
  -1  -1   7 1485.89   68.72
  -1  -1   7 1444.85   66.34
   1   1  -7 1417.24   66.68
   1  -1  -7 1444.35   65.17
  -1  -1  -7 2030.16   31.59
   1   1   7 1937.00   85.93
  -1   1  -7 2044.47   39.65
   1  -1   7 2017.05   24.62
   1   1   7 1970.20   87.40
   1  -1   7 1991.91   87.47
  -1  -1  -7 2079.04   59.52
  -1  -1  -7 2103.85   52.62
   1   1   7 2064.71   55.49
  -1   1  -7 2089.58   53.13
   1   1   7 2168.21   62.10
  -1  -1  -7 2123.45   57.43
   1  -1   7 1983.32   87.11
   3   0  -4   -0.03    2.21
   3   0  -4    2.40    4.53
  -3   0   4    8.19    6.09
   3   0  -4    2.08    5.37
  -3   0   4    5.01    2.87
  -3   0   4    0.35    2.22
  -3   0  -4    0.69    5.05
  -3   0  -4    0.08    5.44
   3   0   4    5.64    5.96
   3   0   4    3.05    1.91
  -3   0  -4    5.81    6.20
  -3   0  -4    0.20    1.18
  -2   1   6 1773.80   84.61
   2  -1  -6 1619.46   68.77
   2   1  -6 1707.11   75.74
  -2  -1   6 1666.09   75.78
  -2   1   6 1535.25   68.26
  -2   1   6 1525.75   64.74
   2   1  -6 1534.68   69.01
  -2  -1   6 1597.76   70.32
   2  -1  -6 1629.33   72.60
   2  -1  -6 1728.31   80.95
  -2   1  -6 4133.99  102.97
   2   1   6 4278.29  105.73
  -2  -1  -6 4244.26  104.09
  -2  -1  -6 4171.55  101.58
   2  -1   6 4220.06  101.85
  -2  -1  -6 4084.20  102.28
   2  -1   6 4198.26  101.79
   2   1   6 4089.25  101.41
  -2  -1  -6 4277.72  105.40
   2  -1   6 4024.02   98.06
  -2   1  -6 4257.84  103.74
   2   1   6 3937.61   94.78
  -2   1  -6 4120.40  102.14
  -2  -1  -6 4149.92  102.00
   1   3  -3   81.92   20.47
   1   3  -3   71.62    8.61
  -1   3   3   69.85   13.67
   1  -3  -3   65.61    9.66
  -1  -3   3   60.11   19.22
  -1   3   3   69.51   15.76
   1  -3  -3   55.89   16.08
  -1  -3   3   75.71    8.20
  -1  -3  -3 7174.18  170.89
  -1  -3  -3 6712.53  158.94
   1   3   3 6380.14  151.26
   1  -3   3 6679.93  155.36
   1  -3   3 6607.35  154.87
  -1  -3  -3 6991.45  164.51
   1   3   3 6974.09  165.01
   1  -3   3 7033.01  169.46
  -1  -2   6  600.63   36.31
   1   2  -6  534.45   24.13
  -1  -2   6  569.60   29.96
  -1   2   6  533.08   23.70
   1   2  -6  541.27   27.76
   1  -2  -6  546.67   23.77
  -1  -2   6  602.24   37.87
   1  -2  -6  562.23   28.78
   1   2   6  668.53   35.19
   1  -2   6  659.61   34.62
  -1  -2  -6  629.04   31.51
  -1  -2  -6  715.91   34.09
  -1  -2  -6  757.94   40.02
   1   2   6  695.72   34.62
   1  -2   6  641.69   33.50
  -1   2  -6  683.55   35.95
  -1  -2  -6  690.81   34.14
   1   2   6  662.22   32.25
   0   3   4   20.27   11.79
   0  -3  -4    5.92    4.00
   0  -3   4   -0.94    4.96
   0   3   4    1.31    2.84
   0  -3  -4   14.53    5.71
   0  -3   4    4.18    3.43
   0   3  -4    0.84    3.62
   0  -3   4    5.13    1.92
   0  -3  -4   10.10    6.43
   0   3   4    3.75    5.31
   0  -3  -4    9.08    5.01
   0   3  -4    6.21    3.26
   3   2   0 1635.37   74.77
  -3  -2   0 1591.81   71.37
  -3  -2   0 1557.91   69.14
   3   2   0 1614.71   72.12
   3  -2   0 1580.85   70.14
  -3   2   0 1631.86   72.69
   3  -2   0 1606.26   72.35
  -3   1   4 3065.30   79.40
   3   1  -4 2697.35   76.72
   3   1  -4 3018.86   75.79
   3   1  -4 2744.28   70.73
  -3  -1   4 2974.70   73.32
  -3   1   4 2851.59   67.96
  -3   1   4 2785.92   67.47
   3  -1  -4 2776.76   66.35
  -3  -1   4 2879.26   70.46
   3  -1  -4 2666.10   63.78
   3  -1  -4 2839.04   74.66
  -3  -1  -4 1690.97   73.86
   3  -1   4 1706.50   75.72
   3  -1   4 1644.74   75.51
   3   1   4 1529.83   68.35
   3   1   4 1642.64   75.37
   3  -1   4 1773.00   78.94
   3  -1   4 1678.34   72.60
  -3   1  -4 1784.31   78.50
  -3  -1  -4 1699.17   75.56
  -3  -1  -4 1607.09   74.11
   3   1   4 1863.59   82.84
  -3   1  -4 1731.46   79.17
  -3   1  -4 1620.54   71.20
   2   2  -5  107.48    9.75
   2  -2  -5   91.71    8.49
   2   2  -5   91.29   13.73
  -2  -2   5  121.52   30.63
  -2   2   5  127.54   13.34
   2  -2  -5  104.41   20.10
  -2   2   5  119.71   17.14
   2  -2  -5  102.80    9.24
  -2  -2   5  106.00   28.58
  -2   2   5  116.04   14.01
  -3  -2   1  248.86   23.58
   3  -2  -1  262.40   22.36
   3  -2  -1  283.17   26.83
   3  -2  -1  267.14   26.08
   3   2  -1  278.89   29.01
  -3   2   1  260.50   22.37
   3  -2  -1  256.78   20.97
  -3  -2   1  287.43   24.30
   3   2  -1  244.84   23.16
   2  -2   5 6752.21  160.63
   2  -2   5 7022.14  164.98
  -2  -2  -5 7394.14  181.16
  -2  -2  -5 7207.82  172.80
  -2   2  -5 6998.17  164.93
   2   2   5 7448.99  177.80
  -2  -2  -5 7206.80  169.08
   2   2   5 6814.86  160.21
   2  -2   5 7252.09  169.84
  -2  -2  -5 7431.27  177.66
   2  -2   5 7361.09  171.15
   3  -2   1  553.66   28.97
  -3  -2  -1  618.26   32.55
   3   2   1  568.14   28.77
   3   2   1  597.19   30.40
  -3  -2  -1  632.42   41.21
   3  -2   1  566.69   31.82
  -3   2  -1  600.05   31.58
  -2  -3   0 1344.11   64.24
   2  -3   0 1221.83   56.59
  -2  -3   0 1377.71   61.77
   2   3   0 1378.46   60.84
   2   3   0 1406.79   65.42
  -2  -3   1    8.15    5.87
   2  -3  -1    7.50    4.88
   2  -3  -1    6.84    4.73
   2  -3  -1    4.25    2.56
  -2  -3   1    2.32    6.13
  -2   3   1    3.22    1.01
   2   3  -1    8.11    3.24
   2   3  -1    8.13    2.03
  -2  -3  -1 5552.02  133.07
   2   3   1 5517.85  131.02
  -2  -3  -1 5152.27  123.94
   2  -3   1 5134.09  123.27
   1  -3  -4 1948.26   89.50
  -1  -3   4 2020.27   26.05
  -1  -3   4 2113.99   58.51
   1   3  -4 1928.62   85.60
   1  -3  -4 1907.47   82.08
   1   3  -4 2001.08   37.82
  -1   3   4 1971.82   84.99
  -1   3   4 1957.53   84.86
   1   3   4    2.35    5.50
   1   3   4    8.46    8.48
  -1  -3  -4   -0.09   22.81
  -1  -3  -4   12.12    7.61
   1   3   4    9.97    4.25
   1  -3   4    9.52    3.38
  -1  -3  -4   10.90    3.91
  -1  -3  -4    0.09    6.23
   1  -3   4    2.85    2.87
   1  -3   4   12.38    8.32
  -3  -2   2  231.09   19.98
   3   2  -2  217.03   20.01
   3  -2  -2  252.57   20.53
   3   2  -2  248.37   27.64
  -3   2   2  247.40   21.16
   3  -2  -2  267.21   21.73
  -3  -2   2  238.32   25.25
  -3  -2  -2  108.71   11.40
  -3  -2  -2   75.20   17.38
   3   2   2   83.22   15.99
  -3  -2  -2   63.99   12.70
   3  -2   2   70.34   20.52
   3   2   2   80.79   13.34
  -3   2  -2   78.47   27.25
   3  -2   2   73.97   15.91
   2   0  -7    0.27    3.74
   2   0  -7    1.05    4.26
  -2   0   7    2.32    2.41
  -2   0   7    1.36    6.66
   2   0  -7   -3.64   13.26
  -2   0   7    0.41    2.74
  -3   0   5   27.53   12.35
  -3   0   5   57.08   17.31
   3   0  -5   32.39   10.29
  -3   0   5   57.04   11.10
   3   0  -5   18.06    5.12
   3   0  -5   32.74    5.11
  -2   0  -7    6.62    4.63
  -2   0  -7    7.47    8.73
  -2   0  -7   16.96    6.54
   2   0   7    2.69    4.30
   2   0   7    6.90    7.59
   2   0   7    8.12    6.42
   3   0   5 2046.14   27.73
   3   0   5 1958.94   84.67
  -3   0  -5 2057.51   32.39
  -3   0  -5 2023.56   32.70
   3   0   5 2071.99   55.37
  -3   0  -5 2088.67   55.34
  -3   0  -5 2029.29   22.53
  -3   0  -5 2189.50   58.46
   1   0  -8   -2.59    6.26
  -1   0   8    8.46    8.73
   1   0  -8   11.03    6.22
  -1   0   8    2.97    1.75
   1   0   8   -5.74   12.00
   1   0   8    2.30    6.29
   1   0   8    9.33    5.96
   1   0   8    1.14    4.42
  -1   0  -8   -4.43    7.02
   0  -1  -8 3236.46   82.95
   0  -1   8 3267.66   81.41
   0   1   8 3371.99   79.77
   0  -1   8 3272.54   86.79
   0   1  -8 3466.91   87.70
   0   1   8 3436.35   86.92
   0   1   8 3257.20   83.37
   0   1   8 3346.11   79.67
   0   1   8 3460.83   87.48
   0  -1   8 3291.58   80.38
   0   1  -8 3388.44   82.09
   0   2   7  551.41   49.85
   0   2   7  556.50   27.48
   0  -2   7  526.64   37.49
   0  -2  -7  554.71   28.44
   0  -2   7  526.62   26.38
   0  -2  -7  460.67   28.10
   0  -2   7  514.34   26.71
   0   2  -7  489.19   24.29
   0  -2  -7  526.64   24.18
   0  -2   7  549.33   29.21
   0  -2  -7  530.85   26.68
  -2  -3   2  738.84   40.34
   2  -3  -2  608.54   30.34
   2   3  -2  712.42   51.68
   2   3  -2  711.39   32.39
  -2  -3   2  690.43   33.63
   2  -3  -2  625.44   31.25
   2  -3  -2  717.37   35.49
  -2   3   2  697.06   31.21
  -2  -3  -2 1353.09   62.47
  -2  -3  -2 1433.52   66.58
   2  -3   2 1279.75   58.22
   2   3   2 1270.90   57.55
  -2  -3  -2 1371.59   66.89
   2  -3   2 1207.02   51.46
   0   3   5 1561.83   75.74
   0  -3  -5 1540.86   68.03
   0  -3   5 1554.41   69.67
   0   3  -5 1655.55   73.93
   0  -3   5 1484.97   63.51
   0  -3  -5 1519.86   70.50
   0   3  -5 1661.76   75.68
   0   3   5 1553.43   67.98
   0  -3  -5 1676.14   74.06
   0   3   5 1588.16   74.40
   0  -3  -5 1612.10   72.29
  -3   2   3 2406.20   58.68
   3   2  -3 2355.19   60.95
   3   2  -3 2393.43   61.64
  -3  -2   3 2313.65   58.42
  -3   2   3 2510.63   62.18
   3  -2  -3 2434.07   59.56
   3   2  -3 2547.91   67.77
  -3   2   3 2584.23   63.90
   3  -2  -3 2344.54   58.00
  -3  -2   3 2609.98   67.61
   3  -2  -3 2463.64   68.02
  -3  -2  -3 5100.02  124.94
   3   2   3 5161.28  129.13
   3   2   3 5197.70  124.84
   3   2   3 5024.84  119.35
   3  -2   3 4916.88  115.68
  -3  -2  -3 4789.58  116.85
  -3   2  -3 5034.35  118.57
  -3  -2  -3 5272.42  125.10
   3  -2   3 4892.65  119.95
  -3   2  -3 5124.43  125.27
   3  -2   3 5141.74  125.57
   2   1  -7   29.18    7.26
  -2   1   7   29.06   14.10
   2  -1  -7   29.72    7.59
  -2  -1   7   60.83   14.22
  -2  -1   7   51.74   15.82
  -2   1   7   25.53    4.17
   2   1  -7   34.07   10.61
   2   1  -7   37.73    9.98
  -2  -1   7   22.87    8.71
  -2   1   7   25.05    6.46
   3   1  -5  807.08   40.58
  -3  -1   5  893.23   43.24
   3   1  -5  945.72   43.69
   3   1  -5  800.09   38.50
  -3   1   5  863.86   37.89
   3  -1  -5  920.88   42.04
  -3   1   5  890.27   40.71
  -3  -1   5  858.42   42.96
   3  -1  -5  829.78   42.23
  -3   1   5  929.78   50.04
  -3  -1   5  832.28   38.46
   3  -1  -5  831.92   36.65
   2   1   7   24.57    6.70
  -2   1  -7    9.55    4.47
  -2  -1  -7   35.77    6.93
  -2  -1  -7   17.60    8.75
   2  -1   7   27.04    6.97
  -2  -1  -7   26.15    6.60
  -2   1  -7   22.50    9.59
   2  -1   7   14.25    8.34
  -2   1  -7   18.69   11.64
   2   1   7   24.65    7.27
   2  -1   7   30.85    7.19
  -2  -1  -7   34.31   10.85
   2   1   7   16.47    6.69
   2   1   7   21.85   10.00
  -2  -1  -7   19.16   13.67
  -3   1  -5 3963.83   97.05
   3  -1   5 3909.38   99.39
  -3  -1  -5 4031.88  100.69
   3   1   5 4148.83  108.28
  -3   1  -5 4004.38  102.10
   3  -1   5 4090.45  100.75
  -3  -1  -5 4049.08  100.36
   3   1   5 3689.16   89.66
  -3  -1  -5 3933.99   99.76
  -3  -1  -5 3843.68   92.57
  -3   1  -5 3888.11   92.89
   3  -1   5 3825.95   92.05
   3  -1   5 3925.91   97.88
  -1  -1   8   33.72   11.78
   1   1  -8   52.46    9.44
   1   1  -8   30.04    7.41
  -1  -1   8   11.75    5.96
   1  -1  -8    0.42   20.24
  -1  -1   8   15.80   12.50
   1  -1   8  392.14   18.69
  -1  -1  -8  341.17   31.47
  -1  -1  -8  384.26   32.19
   1   1   8  335.65   28.04
   1  -1   8  379.76   35.65
  -1   1  -8  355.44   29.78
   1  -1   8  288.10   24.39
  -1  -1  -8  337.59   28.56
   1   1   8  393.17   24.58
  -1   1  -8  367.74   31.48
   1   1   8  392.49   23.74
  -1   2   7 3098.56   71.53
   1  -2  -7 3194.15   85.08
   1  -2  -7 3222.89   82.50
  -1  -2   7 3225.88   84.26
   1   2  -7 3096.60   73.60
   1   2  -7 3229.06   86.92
  -1  -2   7 3330.28   85.88
   1   2   7   18.72   10.20
   1   2   7   11.08    3.85
  -1  -2  -7   12.16    3.40
   1   2   7   20.25    8.11
  -1  -2  -7    0.08    3.86
  -1  -2  -7    5.60    4.88
   1  -2   7   13.77    5.31
  -1   2  -7    4.22    3.78
   1  -2   7   17.93    4.61
  -1  -2  -7    6.73    6.75
   2  -3  -3  316.78   30.30
   2   3  -3  292.82   24.37
   2  -3  -3  278.88   28.03
  -2  -3   3  282.63   26.06
  -2  -3   3  295.22   24.28
   2   3  -3  228.49   28.54
   2  -3  -3  266.13   27.34
  -2   3   3  311.24   29.54
   2   3   3 1386.62   63.81
  -2  -3  -3 1329.74   61.16
   2  -3   3 1316.60   56.68
  -2  -3  -3 1321.93   60.38
   2  -3   3 1304.06   58.48
  -2  -3  -3 1350.64   62.50
  -2   2   6 2794.70   65.26
  -2  -2   6 2905.45   88.35
   2  -2  -6 2773.84   73.39
  -2   2   6 2906.02   73.01
  -2  -2   6 2963.20   75.63
   2   2  -6 2808.80   72.08
   2  -2   6  179.70   17.58
  -2  -2  -6  166.37   21.43
   2   2   6  196.05   18.74
  -2  -2  -6  184.43   16.80
   2   2   6  166.01   20.83
   2   2   6  146.67   31.49
  -2   2  -6  195.64   18.26
  -2  -2  -6  207.06   36.78
   2  -2   6  151.17   20.30
   2  -2   6  186.94   35.87
  -2  -2  -6  141.36   18.43
   2  -2   6  214.86   25.17
  -1   3   5  343.72   27.13
   1  -3  -5  343.52   29.23
   1   3  -5  365.06   34.78
  -1  -3   5  350.51   31.63
   1   3  -5  325.17   29.97
  -1   3   5  339.44   28.29
  -1  -3   5  416.05   25.23
   1  -3  -5  349.79   29.94
   1   3   5 5848.48  138.31
   1  -3   5 6387.16  154.54
  -1  -3  -5 5714.67  138.53
   1  -3   5 5865.43  136.72
  -1   3  -5 5674.52  132.41
   1   3   5 6318.63  158.18
  -1  -3  -5 6079.05  142.94
   1  -3   5 6001.32  142.24
  -1  -3  -5 6383.71  153.48
  -1  -3  -5 6308.90  153.56
   1   3   5 5770.86  138.27
  -4   0   0  335.16   25.47
   4   0   0  370.43   30.59
  -4   0   0  308.07   32.73
   4   0   0  357.55   34.77
  -4   0   0  418.85   15.85
  -4   0   1    0.24    0.49
  -4   0   1    1.58    0.79
   4   0  -1    6.39    4.25
  -4   0   1    2.63    4.44
   4   0  -1    7.62    4.44
  -4   0   1    2.37    7.12
  -4   0  -1    3.39    5.83
   4   0   1   10.03    8.10
  -4   0  -1    7.29    3.50
   4   0   1    7.10    4.42
  -4   0  -1    0.80    1.06
   3   0  -6    3.92    4.06
   3   0  -6    2.49    1.65
   3   0  -6    6.10    5.13
  -3   0   6    1.75    2.87
  -3   0   6    9.24    2.60
  -3   0   6    6.14    2.66
  -3   0  -6    6.04    6.29
  -3   0  -6   -1.69    3.88
  -3   0  -6    7.48    2.99
  -3   0  -6    1.82    4.76
   3   0   6    4.62    2.98
   3   0   6    3.08    4.97
   3   2  -4   49.77   20.13
   3  -2  -4   59.38   10.40
   3  -2  -4   47.39   12.82
  -3   2   4   86.16   13.22
   3  -2  -4   75.55   16.89
  -3   2   4   88.43   19.48
  -3  -2   4   64.58    9.73
  -3   2   4   59.47   15.03
   3   2  -4   68.46   20.27
   3   2  -4   53.16   13.36
   3   2   4 2916.01   72.30
   3  -2   4 2884.79   70.48
  -3  -2  -4 2728.93   70.25
   3  -2   4 2855.20   73.97
  -3  -2  -4 2953.96   76.75
  -3   2  -4 2961.96   74.92
  -3  -2  -4 2938.92   75.55
  -3   2  -4 2884.69   75.80
   3  -2   4 2926.47   75.02
   3   2   4 2998.68   79.66
  -4   0   2 5384.70  130.41
   4   0  -2 6095.89  147.27
  -4   0   2 5729.82  130.97
  -4   0   2 5995.24  142.07
  -4   0  -2 1466.81   66.41
   4   0   2 1421.50   61.20
   4   0   2 1407.88   64.75
  -4   0  -2 1559.41   70.98
   4   0   2 1663.51   75.94
  -4   0  -2 1388.69   59.47
   0   0   9    2.32    3.89
   0   0   9    0.37    2.84
   0   0  -9    3.36    4.35
   0   0  -9    8.99    5.03
  -2   3   4  173.35   22.32
  -2  -3   4  191.58   18.46
   2   3  -4  163.50   19.71
   2   3  -4  153.01   16.01
  -2  -3   4  159.18   14.27
   2  -3  -4  165.17   17.91
   2  -3  -4  168.40   18.37
   2  -3  -4  175.65   15.53
  -2   3   4  186.94   17.83
   2  -3   4  230.60   19.96
  -2  -3  -4  277.07   37.84
  -2  -3  -4  262.61   27.38
  -2   3  -4  306.72   32.54
  -2  -3  -4  228.67   25.85
   2   3   4  230.19   28.00
   2  -3   4  288.63   26.15
   2   3   4  316.33   31.70
   4   1   0 2419.20   65.26
  -4  -1   0 2458.84   58.63
  -4  -1   0 2395.68   63.34
   4   1   0 2351.76   60.81
  -4  -1   0 2484.40   64.96
   4  -1   0 2436.13   65.44
   4  -1   0 2317.08   59.48
  -4   1   0 2322.94   60.31
   0  -3  -6  160.68   29.41
   0   3   6  201.75   23.36
   0  -3  -6  162.04   14.28
   0   3   6  146.31   15.26
   0  -3   6  177.83   22.37
   0   3   6  188.88   28.03
   0  -3  -6  212.70   29.66
   0  -3   6  203.62   16.82
   0   3  -6  170.57   17.55
   0  -3   6  201.42   19.27
   0   3  -6  179.88   21.67
   0  -3  -6  174.73   32.90
  -4   1   1  119.63   17.76
   4  -1  -1  104.47   15.95
  -4  -1   1   91.03   25.96
   4   1  -1   96.21   21.96
  -4  -1   1   81.62   13.19
   4  -1  -1   88.96   29.02
   4   1  -1   67.40   22.30
  -4  -1  -1   36.12    7.86
   4  -1   1   25.19    4.32
   4  -1   1   46.27    8.66
  -4   1  -1   35.76   12.46
   4  -1   1   31.17    9.76
  -4   1  -1   28.07    9.23
  -4  -1  -1   30.78    7.60
  -4  -1  -1   21.60    8.02
   4   1   1   24.09    6.52
   4   1   1   12.28   13.36
  -4   1  -1   34.28    9.77
   2   0  -8  197.18   32.48
  -2   0   8  180.66   31.20
  -2   0   8  164.81   21.77
   2   0  -8  179.33   18.84
   2   0  -8  165.78   19.36
  -2   0   8  174.41   18.97
   0   4   0  625.10   32.54
   0  -4   0  657.61   38.82
   0  -4   0  632.17   40.03
   2   0   8 6171.24  149.83
  -2   0  -8 6762.16  163.14
   2   0   8 6253.45  148.36
  -2   0  -8 6471.68  154.17
   2   0   8 6902.66  163.56
  -2   0  -8 6454.54  154.19
   2   0   8 6776.98  163.62
   0  -4  -1  361.19   30.24
   0   4   1  331.66   28.14
   0  -4   1  334.44   39.06
   0  -4  -1  321.72   27.49
  -3   1   6  104.45   10.46
  -3   1   6  145.69   16.97
   3   1  -6  127.69   34.79
   3  -1  -6  135.72   14.53
  -3  -1   6  169.46   19.86
   3   1  -6  144.93   21.33
   3  -1  -6  130.48   15.06
  -3  -1   6   84.54    9.72
  -3  -1   6   94.98   12.53
   3  -1  -6   96.50   16.32
  -3   1   6  113.31   21.58
  -3   1  -6    6.40    4.74
   3  -1   6    4.76    3.45
  -3  -1  -6    9.75    4.76
  -3  -1  -6    1.62    5.51
  -3   1  -6    5.52    4.47
  -3  -1  -6    5.04    3.89
  -3   1  -6   11.14    5.07
   3   1   6    1.75    5.64
   3  -1   6    4.20    5.49
  -3  -1  -6   -0.96    4.65
   3  -1   6    9.37    6.94
   3   1   6    6.90    7.52
   3  -1   6   10.60    7.13
   0  -2   8 3419.47   85.75
   0  -2   8 3405.64   86.59
   0   2  -8 3528.26   83.91
   0   2   8 3521.19  115.65
   0  -2   8 3486.63   83.91
   0  -2  -8 3435.26   89.96
   0  -2  -8 3398.59   79.82
   0   2   8 3431.01   81.94
   0   2   8 3250.08   81.98
   0  -2  -8 3414.03   81.45
   1   0  -9   -0.96    4.71
   1   0  -9    5.39    7.36
  -1   0   9    6.59    4.02
  -1   0   9    8.52    6.68
   1   0   9 1320.83   62.03
   1   0   9 1342.20   60.75
  -1   0  -9 1271.58   63.07
   1   0   9 1276.41   59.33
   1   0   9 1341.34   61.59
  -1   0  -9 1334.92   64.55
  -4   0   3   -0.28    2.91
  -4   0   3    4.42    3.09
   4   0  -3   11.35    6.28
   4   0  -3   15.17   10.10
   4   0  -3    6.19    5.04
   4   0   3    7.90    5.69
  -4   0  -3    5.51    5.71
   4   0   3    2.63    6.31
  -4   0  -3    5.54    3.71
  -4   0  -3    3.49    2.34
   4   0   3    2.45    3.08
   4  -1  -2 1168.30   57.10
   4  -1  -2 1179.79   50.26
  -4   1   2 1174.05   50.23
   4   1  -2 1134.78   55.38
   4   1  -2 1279.75   58.04
  -4  -1   2 1311.57   61.31
   4  -1  -2 1171.88   53.93
   4  -1  -2 1230.63   56.76
  -4  -1   2 1124.08   51.49
  -4   1   2 1269.09   58.13
  -4  -1  -2  720.68   35.76
   4  -1   2  759.20   39.51
  -4   1  -2  751.37   39.28
  -4  -1  -2  762.01   34.94
  -4   1  -2  788.19   39.93
   4   1   2  800.34   42.67
   4   1   2  742.46   38.49
  -4  -1  -2  757.69   39.05
   4  -1   2  709.79   30.89
   4  -1   2  776.77   39.32
   0   1  -9    7.74    3.07
   0  -1   9   25.19    6.93
   0   1  -9    7.29    4.36
   0  -1   9   15.44   11.74
   0   1   9   10.02    3.41
   0  -1  -9   32.03   11.55
   0   1   9   13.85    7.33
   0  -1   9   29.84    9.09
   0   1   9   16.34    9.19
   0   1   9    3.61    4.12
   0   1   9   25.43    7.68
   0  -4  -2  246.43   29.55
   0  -4  -2  270.86   26.25
   0   4   2  203.21   24.93
   0  -4  -2  231.69   20.34
   0  -4  -2  280.01   42.53
   0  -4   2  237.95   43.04
   0   4  -2  245.49   22.22
   1  -3  -6  677.92   30.61
  -1   3   6  669.94   32.14
   1   3  -6  722.92   36.68
  -1  -3   6  714.16   53.03
  -1  -3   6  674.26   34.28
   1  -3  -6  614.84   34.86
  -1   3   6  670.94   33.73
   1  -3  -6  696.41   36.43
  -1  -3  -6  132.27   31.88
  -1   3  -6   92.88   17.23
   1  -3   6  119.73   18.21
  -1  -3  -6  109.22   30.82
   1   3   6  125.79   38.33
   1   3   6   78.05    9.64
   1  -3   6  122.87   32.44
  -1  -3  -6   87.43   12.73
   1   3   6  106.24   11.53
   1   3   6   83.22    9.94
   1  -3   6  127.85   27.14
   1  -4   0  287.96   24.51
  -1   4   0  288.35   40.86
  -1  -4   0  238.44   28.95
   1  -4   0  247.26   21.12
  -1  -4   0  205.39   21.72
   2   1  -8 3084.82   79.14
   2   1  -8 2917.13   77.99
  -2  -1   8 3119.39   82.29
  -2  -1   8 3118.38   78.29
  -2   1   8 2944.79   68.74
  -2   1   8 2889.02   74.86
   2  -1  -8 3054.69   79.47
  -2   1  -8   26.34    7.50
  -2  -1  -8   20.76   12.17
   2   1   8   49.71   11.85
  -2  -1  -8   56.11   17.50
   2   1   8   39.03    7.20
   2  -1   8   43.85    7.52
  -2   1  -8   13.08   10.39
   2  -1   8   28.06   18.54
  -2  -1  -8   35.84   10.15
   2   1   8   22.42   19.07
  -2  -1  -8   23.84   16.83
  -2  -1  -8   38.79   11.02
   2   1   8   28.72    8.17
   2  -1   8   36.85    7.56
   2   2  -7  303.04   27.35
  -2  -2   7  331.59   27.97
   2  -2  -7  359.31   38.82
  -2   2   7  343.08   29.03
  -2  -2   7  363.93   35.95
  -2   2   7  359.99   30.75
   3   2  -5 2603.13   68.49
   3   2  -5 2446.81   66.53
   3   2  -5 2329.65   61.59
   3  -2  -5 2437.77   62.00
  -3  -2   5 2647.62   73.34
   3  -2  -5 2375.71   56.61
  -3   2   5 2426.91   60.35
   3  -2  -5 2502.43   64.98
  -3   2   5 2505.75   65.20
   1  -4  -1  364.95   28.91
  -1  -4   1  311.65   30.32
   1  -4  -1  365.09   30.26
  -1  -4   1  360.06   32.51
  -1   4   1  365.12   30.56
  -1  -4  -1  318.98   32.90
  -1   4  -1  279.67   22.95
  -1  -4  -1  327.51   28.67
   1  -4   1  288.42   24.71
   1   4   1  322.70   35.54
  -1   4  -1  297.62   34.40
   2   2   7 2080.75   56.48
   2   2   7 2211.97   68.13
   2   2   7 2170.82   58.48
   2   2   7 2265.58   61.10
  -2  -2  -7 2330.57   68.79
   2  -2   7 2311.93   60.83
   2  -2   7 2137.13   55.44
  -2   2  -7 2180.96   59.25
   2  -2   7 2222.65   59.96
  -2   2  -7 2312.90   60.59
  -2  -2  -7 2270.43   67.63
  -2  -2  -7 2151.19   57.36
  -2  -2  -7 2075.50   56.69
   2  -2   7 2206.55   58.16
  -3   2  -5 3002.92   76.16
  -3   2  -5 3116.56   85.27
   3   2   5 2931.57   75.95
  -3   2  -5 3188.90   78.52
   3  -2   5 3216.76   81.65
  -3  -2  -5 3193.82   83.14
   3   2   5 3146.72   83.95
   3  -2   5 3085.56   79.07
  -3  -2  -5 3086.96   80.85
   3  -2   5 3042.91   74.87
  -3  -2  -5 3023.40   76.30
   1  -2  -8  812.72   46.69
   1   2  -8  748.78   34.13
  -1  -2   8  698.45   37.38
  -1  -2   8  780.01   48.57
  -1  -2   8  745.35   50.67
  -1   2   8  766.58   34.26
   1  -2  -8  815.18   41.79
   1   2  -8  708.68   35.57
  -1  -2  -8  244.31   27.56
   1  -2   8  257.30   21.91
  -1   2  -8  259.97   22.67
  -1  -2  -8  218.16   24.90
   1   2   8  231.97   20.68
  -1  -2  -8  270.00   29.57
   1   2   8  284.94   27.88
  -1  -2  -8  254.83   22.79
  -1  -2  -8  215.79   23.06
   1  -2   8  223.12   20.34
   1   2   8  293.16   46.94
  -1   2  -8  266.93   27.50
   3  -3   0  408.37   16.27
   3  -3   0  354.38   31.04
   3  -3   0  361.05   29.03
  -3  -3   0  349.76   39.43
  -3  -3   0  374.21   30.67
   1   1  -9 4107.22  100.45
  -1  -1   9 4226.82  112.35
   1   1  -9 4264.27  106.71
   1  -1  -9 4175.90  102.87
  -1  -1   9 4186.28  102.87
  -2   3   5 2406.22   62.72
   2  -3  -5 2424.33   57.72
  -2   3   5 2564.53   66.50
   2  -3  -5 2281.12   54.79
   2   3  -5 2337.89   55.31
  -2  -3   5 2513.69   69.52
   2  -3  -5 2454.79   65.98
  -1   1  -9 1069.27   53.66
   1  -1   9 1176.73   57.97
  -1   1  -9 1054.93   50.66
  -1  -1  -9 1108.38   52.35
   1  -1   9  984.72   48.96
   1   1   9 1007.37   47.57
   1  -1   9 1012.77   47.93
   1   1   9  966.91   49.54
   1   1   9 1067.92   52.70
   1  -1   9 1073.16   51.27
   1   1   9 1040.20   49.40
  -1  -1  -9 1118.08   53.31
   3  -3  -1 2487.27   66.00
   3   3  -1 2354.72   67.88
  -3  -3   1 2269.22   61.07
  -3  -3   1 2427.88   62.49
   3  -3  -1 2330.63   58.48
   3  -3  -1 2463.51   61.99
   2   3   5  333.59   31.44
   2   3   5  265.98   26.51
  -2  -3  -5  291.75   30.80
   2   3   5  298.03   40.75
  -2  -3  -5  325.79   37.19
  -2  -3  -5  281.20   32.28
   2  -3   5  289.71   28.23
   2  -3   5  303.82   27.09
  -2  -3  -5  345.39   28.89
  -2   3  -5  313.30   27.42
   4  -1  -3   19.75    8.29
  -4   1   3    7.41    4.78
  -4  -1   3    4.79    6.72
   4   1  -3    6.64    9.89
   4   1  -3   25.12   11.32
   4  -1  -3   18.65    5.00
   4  -1  -3   13.58    5.40
  -4  -1   3   15.25    3.87
   4   1  -3   22.96    8.55
  -4   1   3   14.57    3.30
  -4  -1   3   12.39    8.75
  -3  -3  -1    2.69    5.60
   3   3   1   -0.63    5.37
   3  -3   1    9.46    7.44
  -3  -3  -1    8.69    6.44
   3   3   1    4.00    4.62
  -3  -3  -1   10.18    4.20
   3  -3   1   -1.93    4.30
   4   1   3    2.85    6.05
   4  -1   3   -0.32    1.27
  -4  -1  -3    0.16    6.98
  -4   1  -3   16.82    7.02
   4   1   3    9.42    5.97
   4  -1   3    2.67    4.55
  -4  -1  -3    2.03    3.88
   4   1   3    4.39    3.46
   4  -1   3   -0.80    6.06
  -4  -1  -3   19.37    6.20
  -1  -4   2 2615.66   64.43
   1  -4  -2 2619.75   73.45
  -1   4   2 2680.27   81.94
  -1  -4   2 2544.49   79.16
   1  -4  -2 2617.23   63.75
   1  -4  -2 2621.65   66.98
  -1   4  -2  305.93   25.92
   1   4   2  276.00   27.52
   1  -4   2  342.36   43.45
  -1  -4  -2  326.80   32.19
  -1  -4  -2  349.23   31.87
  -1  -4  -2  345.61   33.08
   1   4   2  333.87   29.43
   3   0  -7  298.01   28.46
  -3   0   7  259.30   22.24
  -3   0   7  283.01   23.79
   3   0  -7  317.81   26.89
  -3   0   7  296.42   26.13
   3   0  -7  284.84   29.31
   0  -4  -3  237.81   23.30
   0   4   3  217.53   24.31
   0  -4  -3  192.04   17.69
   0  -4   3  284.76   40.99
   0  -4  -3  220.63   27.91
   0   4  -3  174.68   15.11
   0  -4  -3  212.80   22.04
  -3   0  -7 1717.50   77.86
  -3   0  -7 1727.32   82.96
   3   0   7 1654.95   75.12
   3   0   7 1709.05   78.09
  -3   0  -7 1858.94   84.59
  -4   0   4 6957.56  160.41
   4   0  -4 7327.24  177.56
   4   0  -4 6588.28  154.93
  -4   0   4 7332.28  174.08
   4   0  -4 6774.00  163.73
   4   0   4 1355.09   61.39
  -4   0  -4 1371.80   60.18
  -4   0  -4 1410.31   66.46
   4   0   4 1556.57   71.15
   4   0   4 1382.44   60.56
  -4   0  -4 1591.20   83.29
   3   3  -2  152.43   15.95
   3  -3  -2  187.86   26.27
   3   3  -2  177.88   18.88
   3  -3  -2  182.15   16.16
   3  -3  -2  188.21   16.99
  -3  -3   2  171.29   20.11
  -3  -3   2  179.56   20.33
   3   3   2 3375.52   86.85
  -3  -3  -2 3337.40   93.10
  -3   3  -2 3129.45   75.28
   3  -3   2 3246.93   83.93
   3  -3   2 3288.07   83.85
  -3  -3  -2 3246.43   88.04
  -3  -3  -2 3325.01   84.27
   0  -3   7 2367.61   71.26
   0  -3   7 2482.31   78.45
   0   3   7 2388.36   64.84
   0   3  -7 2493.92   67.88
   0  -3  -7 2325.66   65.41
   0  -3   7 2595.78   76.55
   0   3   7 2390.23   60.80
   0  -3  -7 2479.47   66.69
   0   3  -7 2280.99   54.43
   0  -3  -7 2380.57   58.02
   0  -3   7 2402.10   57.84
   0  -3  -7 2594.92   72.38
   1  -4  -3  151.68   17.83
   1  -4  -3  199.75   18.09
   1   4  -3  191.04   22.61
  -1  -4   3  148.27   36.55
   1  -4  -3  131.13   23.33
   1   4  -3  143.70   15.81
  -1   4   3  161.61   25.55
  -1  -4   3  138.22   12.58
   1  -4   3    3.66    4.16
  -1   4  -3    6.88    5.05
  -1  -4  -3    5.08    8.33
   1   4   3   -0.39    3.73
  -1  -4  -3   -1.89    7.40
   1  -4   3   14.74    7.99
  -1  -4  -3    2.19    3.97
   1   4   3   -2.75    7.19
  -3  -1   7 3818.43  102.47
  -3  -1   7 3663.22   90.61
   3  -1  -7 3533.18   83.56
  -3   1   7 3566.82   83.44
   3   1  -7 3515.10   87.89
  -3   1   7 3564.46   86.50
   3  -1  -7 3817.02   93.65
  -3  -1   7 3866.09   96.60
   3   1  -7 3814.74   96.59
   3  -1  -7 3582.27   94.91
   3   1  -7 3589.65   95.10
   3  -1   7 1443.37   64.26
  -3   1  -7 1528.28   68.61
  -3  -1  -7 1644.12   77.19
  -3   1  -7 1526.35   70.18
  -3  -1  -7 1551.19   83.66
   3  -1   7 1520.11   74.96
   3   1   7 1539.46   75.65
   3  -1   7 1466.83   66.74
  -3  -1  -7 1472.90   69.66
   3  -1   7 1464.85   66.73
  -3  -1  -7 1648.84   75.55
  -3   1  -7 1650.05   75.87
   3   1   7 1446.67   66.08
  -3  -1  -7 1481.34   68.61
  -4  -2   0   58.88    7.99
   4   2   0   52.50   17.93
   4  -2   0   46.82    9.43
   4  -2   0   43.70   17.24
  -4  -2   0   49.56   13.89
  -4   2   0   44.68   15.41
   4   2   0   35.76    9.40
   4  -2   0   73.95   19.51
  -4  -2   0   54.09   16.87
   4  -1  -4 1727.18   78.20
  -4   1   4 1841.08   79.19
  -4   1   4 1917.89   83.71
  -4  -1   4 1877.23   81.68
   4  -1  -4 1743.94   76.74
   4   1  -4 1814.59   80.40
   4   1  -4 1978.70   87.87
   4  -1  -4 1865.49   80.01
   4   1  -4 1809.54   81.55
   4  -1   4  206.62   22.55
  -4  -1  -4  217.95   23.06
   4   1   4  186.12   28.24
   4  -1   4  220.53   20.77
  -4   1  -4  219.65   19.74
   4   1   4  269.11   28.64
  -4  -1  -4  183.22   27.04
  -4   1  -4  206.42   28.65
  -4   1  -4  235.02   31.55
   4   1   4  229.25   21.90
  -4  -1  -4  228.77   20.21
   4  -1   4  229.88   20.26
   4  -2  -1   22.17    9.56
   4   2  -1   33.18   12.68
   4  -2  -1    8.81    3.68
  -4   2   1   16.43   12.03
  -4  -2   1   15.85    8.33
   4  -2  -1   13.78    7.72
  -4  -2   1   12.85    6.20
   4   2  -1    9.52    5.49
   4  -2  -1   12.76    5.43
   4   2   1 1604.29   72.50
  -4  -2  -1 1952.94   90.15
   4  -2   1 1703.74   77.08
  -4  -2  -1 1591.61   74.24
   4   2   1 1758.07   78.98
   4  -2   1 1813.11   82.68
  -4   2  -1 1658.00   75.12
  -4   2  -1 1835.56   85.53
  -4  -2  -1 1742.03   77.58
  -3   3   3   61.39   12.19
  -3  -3   3   54.61   20.29
  -3  -3   3   68.72   13.39
   3   3  -3   68.36   11.12
   3   3  -3   65.55   13.67
   3  -3  -3   56.90   18.68
   3  -3  -3  102.44   17.42
  -3   3   3   83.90   14.15
   3  -3  -3   85.09   13.51
  -3  -3  -3 1083.76   54.48
   3   3   3 1217.33   58.16
   3  -3   3 1087.31   50.77
  -3  -3  -3 1110.83   55.87
  -3   3  -3 1052.38   48.72
  -3  -3  -3 1140.03   52.38
   3  -3   3 1101.73   55.94
   0  -4   4  523.35   28.97
   0  -4  -4  519.86   28.84
   0   4   4  517.08   28.88
   0  -4  -4  491.60   26.24
   0   4  -4  537.43   29.34
   0  -4  -4  539.25   29.59
   0  -4   4  473.41   23.67
   0   4  -4  507.18   30.32
   0  -4  -4  548.58   29.64
   0   0 -10   16.39    4.22
   0   0 -10    5.41    3.94
   0   0  10   -3.72    4.59
   0   0  10   17.80    7.17
   3  -2  -6  370.56   31.20
  -3  -2   6  375.28   34.88
   3  -2  -6  426.72   21.19
  -3   2   6  431.36   27.50
  -3  -2   6  427.70   34.90
   3   2  -6  410.89   16.44
   3   2  -6  351.78   29.57
   3  -2  -6  374.18   29.15
  -3  -2   6  350.34   29.24
  -3   2   6  362.37   30.08
   3   2  -6  355.43   45.32
   3  -2   6 2000.03   28.48
  -3  -2  -6 1988.86   88.81
  -3   2  -6 1974.33   93.62
  -3  -2  -6 1932.02   90.85
   3  -2   6 1978.85   87.56
  -3   2  -6 2070.39   55.47
   3   2   6 2056.27   31.43
   3  -2   6 1938.59   86.19
   3  -2   6 1978.50   91.49
  -3  -2  -6 1992.50   90.08
   3   2   6 2073.22   67.61
  -3  -2  -6 1985.88   89.47
  -2   0   9    2.85    3.71
   2   0  -9    5.97    3.75
   2   0  -9   10.53    5.94
  -2   0   9    4.72    7.22
  -2   0   9    1.35    5.44
  -2   0  -9    4.21    2.17
   2   0   9   -0.41    2.87
  -2   0  -9   10.12    5.83
   2   0   9    2.36    4.92
   2   0   9    2.10    4.51
   2   0   9    7.04    6.32
  -2   0  -9   16.26   11.12
   2   0   9    8.31    4.91
  -1  -3   7 1722.65   77.68
  -1   3   7 1625.30   74.54
  -1  -3   7 1642.83   77.59
  -1   3   7 1595.58   68.46
  -1  -3   7 1667.38   77.19
   1  -3  -7 1706.86   77.65
   1   3  -7 1629.07   81.15
   1   3  -7 1582.27   73.14
   1  -3  -7 1644.51   75.36
   1  -3  -7 1614.42   69.00
  -1  -3  -7    1.96    4.36
   1  -3   7    5.59    3.51
  -1  -3  -7    9.65    3.49
   1   3   7   -0.45    4.27
  -1  -3  -7    2.69    5.59
  -1   3  -7    8.32    4.18
   1  -3   7    2.60    5.78
   1  -3   7    1.39    2.88
   1   3   7    3.76    2.34
   1   3   7  -11.33    8.25
  -1  -3  -7    1.68    3.83
   4  -2  -2  284.80   30.57
  -4  -2   2  292.37   24.71
   4  -2  -2  268.80   23.08
   4  -2  -2  288.25   32.25
   4  -2  -2  313.53   38.65
   4   2  -2  285.81   28.18
   4   2  -2  266.70   23.84
  -4  -2   2  299.84   31.49
  -4   2   2  303.80   37.67
   4  -2   2 1197.70   58.99
   4  -2   2 1219.61   59.65
   4  -2   2 1197.04   53.44
  -4   2  -2 1348.38   67.14
   4   2   2 1304.13   60.00
   4   2   2 1088.19   51.01
  -4  -2  -2 1182.95   53.42
  -4  -2  -2 1058.16   50.21
   0   2   9 1083.55   54.58
   0  -2  -9 1180.08   54.81
   0  -2   9 1203.52   59.21
   0  -2   9 1181.26   54.09
   0   2   9 1155.66   51.27
   0   2   9 1145.73   69.17
   0   2  -9 1153.85   52.03
   0  -2   9 1154.10   91.46
   0  -2  -9 1167.30   55.39
   0  -2   9 1178.89   60.28
  -4   0   5    1.18    2.30
  -4   0   5    5.72    4.47
   4   0  -5    8.29    6.18
  -4   0   5   22.36   10.31
   4   0  -5    6.85    7.77
   4   0  -5   -3.78    2.46
  -4   0  -5    5.82    6.72
  -4   0  -5    9.13    6.38
   4   0   5   -0.52    3.15
   4   0   5    1.24    5.77
  -4   0  -5    1.05    2.11
  -4   0  -5    2.43    2.82
   4   0   5   -0.19    5.52
  -2  -3   6  366.58   33.46
   2   3  -6  329.23   33.05
   2  -3  -6  344.79   27.59
   2   3  -6  340.96   29.19
  -2  -3   6  400.62   15.18
   2   3  -6  316.02   24.50
  -2   3   6  319.54   27.51
  -2   3   6  347.74   31.14
   2  -3  -6  365.83   30.93
  -2  -3  -6  610.89   33.12
   2   3   6  524.47   34.19
   2   3   6  622.14   33.28
   2  -3   6  609.35   29.33
  -2  -3  -6  606.14   33.06
   2  -3   6  547.67   30.33
  -2   3  -6  527.25   28.29
  -2  -3  -6  534.08   40.22
  -2  -3  -6  484.03   26.55
   2  -3   6  527.17   34.85
   2   3   6  571.47   30.56
   2  -4   0   94.10   16.92
  -2  -4   0   74.72   17.91
   2   4   0   30.18   10.68
  -2  -4   0  119.60   23.94
  -2   4   1 2877.06   66.17
   2  -4  -1 3050.55   82.49
  -2  -4   1 3130.52   81.11
   2   4  -1 3296.28   83.78
  -2  -4   1 2999.92   75.80
  -2  -4  -1  600.32   31.84
   2  -4   1  623.27   48.26
   2   4   1  691.56   38.22
  -2  -4  -1  753.54   39.05
  -2   2   8   83.61   34.55
   2  -2  -8  127.76   24.85
  -2   2   8   92.52   27.26
  -2  -2   8  131.14   20.06
   2   2  -8   88.11   13.09
   2   2  -8  148.61   13.24
  -2  -2   8  130.08   16.73
   1   4  -4 1539.54   70.26
  -1   4   4 1614.40   69.14
   1  -4  -4 1550.17   65.30
  -1  -4   4 1698.42   79.08
   1  -4  -4 1671.12   78.85
  -1   4   4 1614.88   68.09
  -1  -4   4 1539.99   62.76
   1   4  -4 1588.94   71.24
  -1   4  -4 3284.08  133.59
  -1  -4  -4 3247.45  136.84
  -1  -4  -4 3311.54  136.51
  -1  -4  -4 3090.11  129.12
   1  -4   4 3460.80  144.21
  -1  -4  -4 3299.57  136.66
   1   4   4 3271.79  137.65
   1  -4   4 3030.12  124.25
   1   4   4 3210.02  133.11
   1  -4   4 3181.84  129.40
   2   2   8 1299.75   73.89
  -2  -2  -8 1361.83   78.47
  -2   2  -8 1292.49   75.41
   2   2   8 1408.86   78.67
  -2  -2  -8 1375.91   87.46
  -2   2  -8 1217.52   70.49
   2  -2   8 1231.82   72.00
   2   2   8 1187.78   66.47
   2  -2   8 1236.59   68.18
  -2  -2  -8 1334.47   74.45
   2  -2   8 1225.52   70.58
  -2  -2  -8 1229.48   74.05
   2   2   8 1194.91   68.97
   1   0 -10   -6.18    5.52
  -1   0  10   -0.73    3.21
   1   0 -10    3.04    5.29
  -1   0  10    6.13    6.63
  -1   0 -10    7.56    4.96
  -1   0 -10   12.36    9.94
   1   0  10    1.41    3.10
   1   0  10    2.50    4.82
   1   0  10   -2.56    8.28
   1   0  10    9.87    5.44
   0  -1 -10  785.80   47.57
   0  -1  10  750.07   43.39
   0   1  10  809.34   46.04
   0  -1  10  747.01   44.74
   0   1  10  850.16   51.88
   0   1 -10  845.13   48.43
   0  -1  10  771.47   48.24
   0   1 -10  841.36   49.56
   0   1  10  811.10   55.76
   0   1  10  820.41   50.00
   0   1  10  814.51   46.21
   2   1  -9  313.01   35.29
  -2  -1   9  216.51   34.57
  -2   1   9  258.12   29.56
  -2   1   9  181.37   38.64
   2  -1  -9  254.63   35.25
   2   1  -9  284.99   38.65
  -2  -1   9  234.23   29.20
   2   1  -9  239.77   27.81
   2   1  -9  208.98   34.73
  -2   1   9  318.14   39.10
  -2  -1   9  229.56   29.39
   2   1   9  513.56   35.26
   2  -1   9  492.10   36.58
   2   1   9  499.74   36.03
  -2  -1  -9  511.10   31.71
  -2  -1  -9  547.92   34.30
   2  -1   9  422.72   47.97
  -2   1  -9  474.82   32.38
  -2  -1  -9  507.15   32.74
   2   1   9  441.91   28.62
   2  -1   9  517.41   38.79
   2   1   9  474.46   31.50
  -2   1  -9  401.54   47.34
  -3  -3   4 1580.84   67.92
  -3   3   4 1744.35   73.95
  -3   3   4 1686.04   71.91
   3  -3  -4 1572.85   70.13
  -3   3   4 1685.38   70.50
  -3  -3   4 1717.49   75.31
   3   3  -4 1629.18   72.35
   3   3  -4 1728.82   73.24
   3   3   4 2442.50  104.11
  -3  -3  -4 2560.44  107.58
   3   3   4 2622.20  112.41
  -3  -3  -4 2623.67  110.98
  -3   3  -4 2541.96  104.17
  -3  -3  -4 2775.47  118.43
   3  -3   4 2546.84  107.17
   3  -3   4 2564.20  110.69
  -3   3  -4 2389.11  100.91
  -2  -4   2   92.65   33.95
   2   4  -2  141.60   23.79
  -2   4   2  124.52   19.26
   2   4  -2  115.29   15.51
  -2  -4   2  118.68   15.86
   2  -4  -2  103.92   22.92
   2  -4  -2  117.00   14.75
  -2   4   2  120.47   16.69
  -2  -4  -2 1565.42   68.93
   2  -4   2 1543.71   67.58
  -2  -4  -2 1499.73   31.20
   2   4   2 1638.72   71.82
  -2  -4  -2 1720.54   75.48
   2  -4   2 1658.78   71.18
   1  -2  -9    2.73    8.05
  -1   2   9    6.91    2.24
   1   2  -9    6.30    8.13
  -1  -2   9    2.47    6.66
  -1  -2   9    9.30    5.89
   1   2  -9   18.39    6.11
  -1  -2  -9 1180.65   69.04
  -1  -2  -9 1166.70   66.33
   1   2   9 1174.60   65.58
   1  -2   9 1295.89   73.09
  -1   2  -9 1220.19   69.78
  -1  -2  -9 1102.92   61.06
  -1   2  -9 1198.57   79.26
   1  -2   9 1281.17   78.23
  -1  -2  -9 1194.50   69.13
   1   2   9 1192.19   69.10
   1   2   9 1092.03   64.27
  -4  -2   3   96.86   19.08
   4  -2  -3   92.31   23.01
   4   2  -3   69.52   17.68
  -4  -2   3   85.11   20.28
   4  -2  -3   70.18   10.77
  -4   2   3  122.05   19.50
   4  -2  -3   78.25   12.87
   4   2  -3   73.22   22.42
  -4   2   3   67.17    9.66
   4   2  -3   93.02   21.02
  -4   2  -3   29.28    9.65
   4   2   3    4.81   12.87
  -4  -2  -3   18.72   17.63
   4  -2   3   29.20    4.29
   4  -2   3   19.83    6.78
  -4  -2  -3   29.42    8.83
   4   2   3   16.22    8.63
  -4  -2  -3   26.54    6.87
   4  -2   3   22.97    8.26
   4  -2   3   23.47    4.58
  -4   1   5  200.91   27.80
   4  -1  -5  185.27   27.90
  -4   1   5  209.63   28.71
  -4  -1   5  231.51   26.81
  -4  -1   5  227.62   38.83
   4  -1  -5  174.24   27.82
   4   1  -5  219.84   49.64
   4   1  -5  148.10   22.76
   4   1  -5  200.09   24.46
   4  -1  -5  115.77   28.57
  -4   1   5  203.67   29.33
   3   0  -8    3.31    8.11
  -3   0   8    3.69    3.90
  -3   0   8    2.78    3.78
   3   0  -8    3.67    5.33
  -3   0   8    3.43    3.98
   3   0  -8    4.21    3.65
  -4  -1  -5   76.03   18.29
  -4   1  -5   90.39   20.47
   4  -1   5   76.85   15.81
   4   1   5   66.21   12.94
   4   1   5   57.13   24.69
  -4  -1  -5   34.18   20.38
   4  -1   5   96.41   19.92
  -4   1  -5   70.56   21.64
   4   1   5   70.04   17.19
  -4   1  -5   95.06   21.98
  -4  -1  -5   57.20   13.46
   4  -1   5   66.74   24.54
   3   0   8    9.47    7.36
  -3   0  -8    6.90    6.07
   3   0   8   25.43   15.89
  -3   0  -8    8.63    7.27
  -3   0  -8    0.80    6.34
   3   0   8    0.23    2.09
   0  -4   5  316.71   36.70
   0  -4   5  308.44   34.26
   0  -4   5  386.14   44.75
   0   4  -5  326.89   40.12
   0   4   5  303.05   40.25
   0  -4  -5  342.56   40.24
   0   4  -5  278.34   32.00
   0   4   5  317.33   36.16
   0  -4  -5  347.79   41.73
   0  -4  -5  367.30   41.64
  -1  -1  10  448.08   39.09
   1  -1 -10  470.96   31.06
   1  -1 -10  441.15   21.07
   1   1 -10  420.45   47.64
  -1  -1  10  438.26   22.88
   1   1 -10  462.77   47.19
   1  -1  10   94.19   16.36
   1   1  10   88.46   21.91
  -1   1 -10  117.90   32.74
   1  -1  10  115.72   16.57
   1   1  10  102.73   34.05
   1   1  10   85.36   20.54
   1   1  10   64.15   15.19
   1   1  10   97.32   14.19
  -1  -1 -10   83.60   27.64
   1  -1  10   83.13   18.17
   1  -1  10   78.72   26.77
  -1   1 -10   72.17   32.33
   0   3   8 1449.36   82.03
   0   3   8 1549.41   70.15
   0  -3  -8 1534.35   68.70
   0  -3  -8 1468.81   24.95
   0  -3   8 1474.86   40.31
   0  -3   8 1443.92   77.15
   0   3   8 1490.25   20.55
   0  -3   8 1693.12   75.20
   0   3  -8 1477.14   20.33
   0  -3   8 1496.27   35.75
   0  -3  -8 1572.10   75.01
   2  -4  -3 1590.56   68.01
  -2   4   3 1614.27   66.69
  -2   4   3 1712.87   71.13
   2   4  -3 1506.55   70.27
   2   4  -3 1663.69   69.42
   2  -4  -3 1799.42   79.10
  -2  -4   3 1792.72   81.58
  -2  -4   3 1628.27   68.24
   2   4  -3 1622.16   72.72
  -2  -4  -3 1995.50   92.29
   2  -4   3 1864.99   83.12
  -2  -4  -3 1943.55   83.45
   2  -4   3 2096.69   90.19
   2   4   3 1726.73   77.99
  -2  -4  -3 2022.78   91.75
   2  -4   3 1873.06   75.78
   2   4   3 1974.24   88.68
   2  -4   3 1760.06   71.73
   3  -1  -8  258.48   39.38
   3   1  -8  221.88   28.28
   3   1  -8  236.47   30.91
  -3  -1   8  209.82   28.97
   3  -1  -8  200.08   30.02
  -3   1   8  250.64   41.52
  -3  -1   8  264.07   32.25
  -3  -1   8  234.93   33.42
   3  -1  -8  192.31   23.01
   3   1  -8  255.32   32.01
  -3   1   8  229.89   25.68
  -3   1   8  196.43   25.30
  -3   1  -8  529.14   40.36
  -3  -1  -8  531.12   44.56
  -3   1  -8  583.37   42.94
  -3  -1  -8  558.92   38.91
  -3  -1  -8  511.93   36.89
   3   1   8  537.87   42.86
   3   1   8  538.19   38.13
   3  -1   8  540.53   32.64
  -3  -1  -8  471.15   35.54
  -3  -1  -8  659.41   39.48
   3  -1   8  531.14   34.18
  -3   1  -8  568.24   35.45
   3  -1   8  534.95   32.99
  -3   1  -8  607.15   39.97
  -4   0   6  274.73   32.11
   4   0  -6  178.21   28.82
   4   0  -6  178.74   36.64
   4   0  -6  225.91   26.09
  -4   0   6  221.20   32.43
  -4   0   6  218.15   25.93
   3  -2  -7   46.85   14.38
   3  -2  -7   51.96    4.62
   3   2  -7   47.43   12.91
   3  -2  -7   85.20   17.40
  -3  -2   7   72.79   16.82
   3   2  -7   50.97    9.15
  -3  -2   7   67.81   12.93
  -3  -2   7   47.08   15.03
  -3   2   7   59.98   13.38
  -3   2   7   49.54   14.89
   3   2  -7   50.39   14.03
   4   0   6  239.30   28.65
  -4   0  -6  262.38   33.03
  -4   0  -6  270.86   32.47
  -4   0  -6  285.53   33.76
   4   0   6  246.73   33.65
  -4   0  -6  262.42   31.57
  -4   0  -6  225.14   27.46
   4   0   6  218.13   35.02
  -1   4   5  359.72   45.33
   1   4  -5  297.10   35.52
   1   4  -5  391.98   49.18
   1  -4  -5  306.87   35.92
  -1  -4   5  296.02   37.59
  -1   4   5  360.64   40.86
  -1  -4  -5  907.40   52.84
   1   4   5  788.03   47.81
  -1  -4  -5 1054.52   70.56
   1   4   5  941.65   55.39
   1  -4   5  906.51   57.68
  -1  -4  -5  933.57   54.96
   1   4   5  935.83   75.49
  -1  -4  -5  847.25   52.56
   1  -4   5  848.64   49.07
   1  -4   5  895.65   51.54
  -3   2  -7 1503.72   67.41
   3   2   7 1468.15   85.68
   3   2   7 1469.06   28.56
  -3  -2  -7 1474.61   42.87
   3  -2   7 1472.66   43.97
  -3  -2  -7 1409.36   88.39
  -3   2  -7 1445.02   81.92
  -3   2  -7 1511.17   65.64
   3  -2   7 1473.36   36.59
   3  -2   7 1383.38   76.95
   3  -2   7 1362.96   78.16
  -3  -2  -7 1485.79   32.25
  -3  -2  -7 1529.20   68.74
   3   2   7 1562.60   68.11
  -4  -2   4 2130.33   93.37
   4  -2  -4 2188.83   90.86
   4   2  -4 2211.13   94.33
   4   2  -4 2152.88   92.00
  -4   2   4 2290.40   94.04
  -4  -2   4 2344.24   99.06
   4  -2  -4 2217.99   96.45
   4   2  -4 2174.38   93.73
   4  -2  -4 2229.09   91.44
  -4   2   4 2359.68  100.95
   4  -2   4 2671.00  112.70
   4   2   4 2561.44  107.43
   4  -2   4 2651.19  110.06
   4   2   4 2672.27  110.50
  -4  -2  -4 2767.38  116.05
  -4   2  -4 2867.97  125.38
   4   2   4 2937.79  128.45
  -4   2  -4 2745.65  114.78
   4  -2   4 2803.77  123.85
   4  -2   4 2631.62  111.27
  -4  -2  -4 2826.85  122.20
  -4  -2  -4 2581.12  115.32
   2   3  -7    2.39    1.08
   2   3  -7    4.24    4.81
  -2  -3   7   -0.39    7.74
  -2   3   7   -1.53    6.69
  -2  -3   7    7.85    7.00
   2  -3  -7    5.26    1.28
  -2   3   7    2.53    7.24
   2  -3  -7    9.03    6.15
   2   3  -7    4.42    1.43
  -3   3   5  163.22   27.08
   3   3  -5  190.48   22.88
   3  -3  -5  177.43   23.26
  -3   3   5  141.29   28.74
   3   3  -5  158.11   22.33
   3  -3  -5  151.52   19.12
  -3  -3   5  143.02   22.22
  -3   3   5  197.04   33.76
   2   3   7  685.68   50.39
  -2  -3  -7  772.21   48.92
  -2  -3  -7  736.44   43.79
   2  -3   7  726.75   46.47
  -2  -3  -7  706.98   42.11
   2   3   7  780.67   45.89
   2   3   7  729.85   59.59
  -2   3  -7  766.55   56.56
  -2  -3  -7  859.19   63.40
   2  -3   7  787.24   50.73
   2  -3   7  718.79   46.55
   3   3   5 1766.43   75.83
  -3  -3  -5 1842.49   80.04
  -3  -3  -5 1751.81   76.70
   3  -3   5 1846.01   77.99
   3  -3   5 1725.42   81.06
   3   3   5 1925.78   87.33
  -3  -3  -5 1948.90   88.01
  -3   3  -5 1714.08   83.31
   3  -3   5 1765.83   78.65
   1   3  -8   41.77   14.11
  -1   3   8   44.68    7.76
  -1  -3   8   53.28   11.84
   1  -3  -8   52.30   12.02
   1  -3  -8   61.03    7.07
  -1   3   8   46.84    5.69
  -1  -3   8   51.45   24.80
   1   3  -8   27.36    8.38
   1  -3  -8   33.81    9.15
   1   3  -8   42.09    5.56
  -1  -3   8   39.26    9.08
   1   3   8 1037.34   68.85
  -1  -3  -8 1136.92   67.21
  -1  -3  -8 1272.14   79.04
   1   3   8 1053.22   59.89
   1   3   8 1192.95   72.09
  -1  -3  -8 1116.74   62.66
  -1  -3  -8 1139.28   65.33
  -1   3  -8 1094.52   59.65
   1  -3   8 1025.04   57.94
   1  -3   8 1130.69   66.72
   1  -3   8 1062.42   59.99
   1   3   8 1133.80   62.91
   1  -3   8 1212.49   71.58
   4  -1  -6 4946.32  199.78
   4  -1  -6 4467.08  180.33
  -4  -1   6 4892.17  200.09
   4  -1  -6 4493.73  186.84
   4   1  -6 4601.08  192.29
  -4  -1   6 4997.22  202.90
   4   1  -6 4544.88  189.12
  -4   1   6 4903.69  203.68
  -4  -1   6 5325.42  220.50
   4   1  -6 5056.78  206.28
  -4   1   6 4844.08  195.29
  -4   1   6 4717.90  191.30
  -4  -1  -6 2485.07  110.75
  -4  -1  -6 2704.65  111.92
  -4  -1  -6 2832.06  121.31
  -4   1  -6 2819.22  125.67
   4  -1   6 2683.61  110.04
   4   1   6 2766.65  122.61
   4   1   6 2591.12  107.72
  -4   1  -6 2663.82  112.56
   4  -1   6 2693.19  116.58
  -4  -1  -6 2670.82  116.89
  -4   1  -6 2706.59  112.56
   4  -1   6 2747.74  115.22
   4   1   6 2521.25  106.24
   2  -4  -4  151.80   33.21
  -2  -4   4  115.36   13.46
   2   4  -4  123.44   24.43
  -2   4   4  117.91   20.94
   2  -4  -4  106.81   15.80
   2  -4  -4   90.44   22.97
  -2  -4   4   86.61   24.56
  -2   4   4  119.03   19.58
   2   4  -4   72.67   35.40
   2   4  -4  135.14   16.83
   2   4   4 1497.52   33.43
   2   4   4 1580.15   76.56
   2  -4   4 1646.07   80.76
  -2  -4  -4 1566.26   75.06
   2  -4   4 1376.05   74.56
  -2  -4  -4 1376.90   76.51
   2  -4   4 1481.72   25.06
  -2  -4  -4 1546.76   74.08
   2  -4   4 1446.67   77.00
  -2   0  10  141.80   18.71
  -2   0  10  210.64   24.20
  -2   0  10  147.29   26.86
   2   0 -10  208.24   27.29
   2   0 -10  171.88   21.66
   0  -4  -6  831.00   49.30
   0   4  -6  640.08   49.52
   0  -4  -6  764.14   43.73
   0  -4   6  739.72   39.90
   0  -4  -6  706.89   44.21
   0   4   6  716.17   51.07
   0   4   6  787.73   48.65
   0  -4   6  754.98   46.91
   0   4  -6  709.03   43.83
   0  -4  -6  777.23   48.84
   0   4   6  722.09   46.86
   0  -4   6  811.19   60.40
   2   0  10 2345.72  113.10
  -2   0 -10 2247.10   96.69
   2   0  10 2482.50  106.83
   2   0  10 2435.41  106.14
   2   0  10 2383.05  101.49
  -2   0 -10 2533.38  107.21
  -2   0 -10 2409.08  102.99
   2   0  10 2478.24  109.96
  -5   0   0    1.37    4.43
   5   0   0   32.16   11.08
   5   0   0    9.74    7.09
  -5   0   0    0.01    5.56
   0   2  10   30.31   13.62
   0  -2  10   35.77   11.40
   0   2  10   47.72   11.05
   0  -2  10   49.68   11.83
   0  -2 -10   52.04   11.92
   0   2  10   39.49   20.63
   0  -2  10   66.27   12.19
   0   2 -10   54.45   12.16
   0  -2  10   46.05    9.03
   0   2 -10   48.53   19.65
  -2  -2   9  718.47   45.10
  -2   2   9  623.87   37.85
  -2  -2   9  734.12   55.04
   2   2  -9  681.41   51.70
   2   2  -9  684.22   38.29
   2  -2  -9  730.19   44.93
  -2   2   9  759.31   49.48
   0   0  11   10.61    8.31
   0   0 -11    8.84    4.79
   0   0 -11    7.95    3.51
   0   0  11   16.22    7.08
  -2   2  -9  508.16   31.21
   2   2   9  520.12   32.54
  -2  -2  -9  546.38   39.12
  -2   2  -9  477.81   43.63
   2  -2   9  474.47   39.74
   2  -2   9  448.04   32.78
  -2  -2  -9  490.77   34.67
  -2  -2  -9  467.68   34.00
  -2  -2  -9  481.40   30.85
  -2  -2  -9  516.97   38.80
   2   2   9  467.82   29.76
   2  -2   9  462.76   28.58
   2   2   9  417.43   51.21
   2   2   9  535.25   37.29
  -5   0   1    9.05    7.03
   5   0  -1    4.87    4.09
  -5   0   1    2.08    5.14
   5   0  -1    2.56    6.82
   5   0   1  124.62   18.17
   5   0   1  165.61   42.03
  -5   0  -1  141.18   36.61
  -5   0  -1  159.86   17.87
  -5   0  -1  126.50   29.87
   4   2  -5   17.89    4.50
   4  -2  -5   16.19    5.28
   4  -2  -5   22.40   12.58
   4   2  -5   19.89    5.89
  -4  -2   5    3.10    6.54
  -4   2   5   44.63    9.48
   4   2  -5   22.93    9.45
  -4  -2   5   31.94    7.61
   4  -2  -5   29.75    5.94
  -4   2   5   25.54    7.78
  -4  -2  -5  616.89   39.33
   4  -2   5  491.91   31.23
  -4   2  -5  671.19   41.31
   4  -2   5  609.62   35.50
  -4  -2  -5  624.56   41.11
   4  -2   5  579.59   51.14
  -4  -2  -5  534.67   32.79
   4   2   5  570.24   36.61
   4   2   5  582.69   35.96
  -4   2  -5  583.28   37.99
   4  -2   5  596.85   37.53
  -4  -3   0 1074.91   62.15
   4  -3   0 1190.07   69.35
   4   3   0 1196.42   67.38
   4  -3   0 1121.76   62.80
  -4  -3   0 1221.73   69.91
   4  -3   0 1036.73   56.55
  -4   3   0 1196.85   73.90
   1   4  -6   97.22   36.39
   1  -4  -6   91.15   11.15
  -1  -4   6  116.01   26.69
   1  -4  -6  117.96   29.65
   1  -4  -6  118.13   18.01
  -1   4   6   94.38   12.55
   1   4  -6   95.30   20.69
  -1   4   6  126.96   23.22
  -1  -4   6  110.56   23.54
   1  -4   6  908.76   52.53
  -1  -4  -6 1045.84   61.75
   1   4   6  954.57   56.54
  -1  -4  -6  986.61   59.51
   1  -4   6  976.34   80.49
   1   4   6  943.02   52.94
  -1  -4  -6  991.26   60.10
  -1  -4  -6  941.33   64.06
   1  -4   6  932.01   51.13
   5   0  -2    3.12    5.83
   5   0  -2    1.14    5.11
  -5   0   2    5.30    5.52
  -5   0   2    4.11    6.42
   3   0  -9 2557.39  107.35
  -3   0   9 2782.68  118.82
  -3   0   9 2815.21  118.83
   3   0  -9 2822.12  123.23
   3   0  -9 2574.55  112.73
  -3   0   9 2666.94  109.21
  -5   0  -2    3.87    6.99
   5   0   2   12.76    6.59
   5   0   2    2.58    1.54
  -5   0  -2    1.04    2.02
   5   0   2   14.39    4.11
  -5   0  -2    3.08    7.07
   2   1 -10  372.05   43.49
  -2   1  10  411.46   45.33
   2   1 -10  485.44   30.53
   2   1 -10  460.09   28.61
   2  -1 -10  422.91   48.18
   2   1 -10  445.09   18.67
  -2   1  10  358.36   48.15
  -2  -1  10  513.20   32.18
  -2   1  10  454.94   34.24
  -2  -1  10  496.69   49.24
  -2  -1  10  436.70   15.98
   2  -1 -10  327.67   40.36
  -3   0  -9 2343.90  100.51
  -3   0  -9 2333.59  103.59
   3   0   9 2244.89   96.60
  -3   0  -9 2335.73  103.31
   3   0   9 2025.24   88.21
   3   0   9 2138.22   93.07
   2   1  10  964.33   59.93
   2   1  10 1193.46   70.66
  -2   1 -10 1073.89   67.54
   2  -1  10 1013.20   66.82
  -2  -1 -10 1009.22   58.55
   2  -1  10  939.18   53.43
  -2  -1 -10 1030.82   59.66
  -2   1 -10  929.09   53.64
   2  -1  10  953.49   55.00
  -2  -1 -10 1076.37   68.98
   2  -1  10  902.05   52.03
   2   1  10 1005.24   60.06
  -4  -3   1 1561.72   67.22
   4  -3  -1 1522.37   64.76
  -4   3   1 1556.07   72.07
   4  -3  -1 1499.89   24.86
   4  -3  -1 1652.39   73.76
   4   3  -1 1671.05   76.23
  -4   3  -1   30.52    9.75
  -4  -3  -1   71.65   19.48
   4   3   1   24.15    6.25
   4   3   1   48.47   12.58
  -4  -3  -1   23.22    5.30
  -4  -3  -1   40.32    6.50
   4  -3   1   34.11   10.23
   4  -3   1   37.16   12.61
  -5   1   0  339.42   45.00
   5  -1   0  281.46   37.14
  -5  -1   0  277.58   33.95
  -5   1   0  245.08   44.30
  -5  -1   0  333.21   43.27
   5   1   0  254.80   37.88
   5   1   0  343.35   48.37
   5  -1   0  325.84   37.82
  -5  -1   0  338.63   38.29
   1   2 -10   41.39    5.18
  -1  -2  10   89.22   23.13
  -1  -2  10   30.99   10.92
  -1   2  10   49.83    8.91
   1  -2 -10   70.30   13.27
   1   2 -10   58.97   16.43
   1  -2  10 2011.48   86.37
   1  -2  10 1970.19   83.90
   1   2  10 1916.41   81.45
   1   2  10 2007.74   90.24
  -1   2 -10 1970.26   85.86
  -1   2 -10 1981.62   87.29
  -1  -2 -10 1902.68   80.21
  -1  -2 -10 2054.30   95.98
  -1   0  11  685.43   47.60
   1   0 -11  703.77   48.11
  -1   0  11  652.80   40.51
   1   0 -11  640.23   45.27
   4   0  -7    5.14    4.63
   4   0  -7    5.43    3.42
  -4   0   7    3.63    2.84
  -4   0   7   29.47   10.54
   4   0  -7   -6.65    4.74
  -4   0   7    2.45    2.58
  -1   0 -11  285.68   37.68
   1   0  11  227.43   27.52
  -1   0 -11  258.47   32.20
   1   0  11  281.64   33.89
   3  -3  -6  122.54   16.36
   3   3  -6  122.66   16.40
   3  -3  -6  121.10   17.57
  -3   3   6  148.10   23.55
  -3   3   6  116.08   28.80
  -3   3   6   98.61   24.83
   3  -3  -6  143.44   19.39
  -3  -3   6  112.83   38.36
   3   3  -6   83.39   26.47
  -4   0  -7    0.10    2.87
  -4   0  -7    5.29    6.12
   4   0   7   10.48    6.21
  -4   0  -7    2.42    3.63
   4   0   7    5.96   11.05
  -4   0  -7    5.26    8.57
  -3  -3  -6   38.24   14.59
   3  -3   6   48.15   12.85
  -3  -3  -6   43.05   11.97
   3   3   6   47.97   13.68
   3   3   6   24.78   17.20
  -3   3  -6   51.97   14.31
   3   3   6   30.24   11.60
   3  -3   6   47.68   13.52
  -3  -3  -6   49.85   16.00
  -3  -3  -6   68.23   18.33
   3  -3   6   26.71    6.43
   3  -3   6   37.79    9.09
   0   1  11   11.16    6.38
   0   1 -11   10.50    6.54
   0  -1 -11    6.11    5.49
   0   1  11   44.38   15.21
   0   1  11    5.59    3.53
   0   1  11    4.03    2.60
   0  -1  11   18.97   13.25
   0  -1  11   24.51    6.13
   0  -1 -11   34.02    9.51
   0   1 -11    7.40    7.25
   5  -1  -1  293.70   33.47
   5  -1  -1  310.59   47.77
  -5  -1   1  376.52   41.44
   5   1  -1  276.57   37.89
  -5  -1   1  330.09   41.82
   5   1  -1  370.18   42.30
  -5   1   1  340.13   40.44
  -5  -1   1  364.83   41.42
  -5  -1  -1 2425.97  104.88
   5   1   1 2056.57   93.16
   5  -1   1 2228.07   94.56
   5  -1   1 2513.39  107.05
  -5  -1  -1 2364.54   96.11
   5   1   1 2441.53  104.17
  -5  -1  -1 2211.49   94.71
  -5   1  -1 2324.23   99.36
   3  -4   0 3242.77  137.00
  -3  -4   0 3159.44  135.37
   3   4   0 3375.11  141.40
  -3  -4   0 3108.00  128.05
  -2  -4   5   31.21    8.84
  -2   4   5   16.48    4.93
   2  -4  -5   15.49   13.14
   2   4  -5   55.94   10.99
   2  -4  -5   27.84    5.53
   2  -4  -5   27.27    6.18
  -2   4   5   19.01    7.43
   3   4  -1   70.07   12.76
  -3  -4   1   64.36   17.86
  -3  -4   1   84.27   11.55
   3  -4  -1   56.57   16.01
   3  -4  -1   50.91   14.47
  -2  -4  -5 2955.31  126.42
   2  -4   5 2529.28  103.95
   2   4   5 2625.04  126.54
  -2  -4  -5 2859.66  118.96
   2  -4   5 2635.97  114.13
   2  -4   5 2703.74  110.20
   2   4   5 2501.12  107.59
   2   4   5 2791.13  123.32
  -2  -4  -5 2840.61  123.70
  -2  -4  -5 2766.89  116.54
   2  -4   5 2671.17  110.62
   3  -4   1  464.94   45.52
  -3  -4  -1  387.70   43.65
  -3  -4  -1  458.43   34.73
   3  -4   1  412.97   46.94
   3   4   1  454.50   28.69
  -3  -4  -1  438.62   22.84
   4  -3  -2  679.18   39.97
   4   3  -2  645.92   52.49
   4  -3  -2  667.55   42.53
  -4  -3   2  709.53   40.52
  -4   3   2  809.96   46.55
  -4  -3   2  801.02   47.60
   4  -3  -2  656.40   37.90
   4   3  -2  823.95   50.21
   4  -3   2 1461.83   82.71
   4  -3   2 1498.94   29.06
  -4   3  -2 1381.41   83.85
   4   3   2 1485.10   34.79
  -4  -3  -2 1453.93   80.93
  -4  -3  -2 1540.49   70.98
  -4  -3  -2 1458.62   81.08
   0   3   9  131.52   15.69
   0  -3  -9  154.36   38.26
   0  -3   9  182.60   23.75
   0  -3  -9  154.41   22.81
   0  -3  -9  156.04   18.66
   0   3   9  145.80   30.49
   0  -3   9  161.24   22.56
   0   3  -9  120.80   19.40
   0  -3   9  150.72   19.12
  -3   2   8   43.96   17.37
   3   2  -8   88.40   20.32
  -3  -2   8   58.52   13.96
  -3  -2   8   62.90    8.85
  -3  -2   8   72.12   16.81
   3   2  -8   38.94   27.92
   3  -2  -8   69.13   10.62
  -3   2   8   39.75   13.52
  -3   2  -8  171.15   23.27
   3  -2   8  182.04   30.22
   3  -2   8  173.21   42.63
  -3  -2  -8  174.02   30.18
   3   2   8  160.62   26.33
  -3  -2  -8  223.29   28.59
  -3   2  -8  183.31   22.97
   3  -2   8  208.05   30.30
   3   2   8  142.74   45.62
  -3  -2  -8  170.98   42.89
   3   2   8  176.05   25.22
   3  -2   8  162.92   19.74
  -5   0   3 1010.79   56.80
   5   0  -3  994.13   63.08
   5   0  -3  926.81   55.70
  -5   0   3  947.54   50.54
   5   0  -3  862.83   49.09
  -5   0  -3 1474.42   43.53
   5   0   3 1468.83   34.48
   5   0   3 1451.30   77.02
  -5   0  -3 1490.00   15.64
   5  -1  -2 1039.88   58.71
   5  -1  -2 1031.42   57.60
  -5  -1   2 1209.25   69.75
  -5  -1   2 1025.83   58.94
   5   1  -2 1033.74   66.34
   5   1  -2 1256.88   77.13
   5  -1  -2 1110.23   65.32
  -5   1   2 1186.34   66.06
  -3   1   9  606.64   33.21
   3  -1  -9  695.48   41.65
  -3  -1   9  643.30   38.51
  -3   1   9  666.93   39.48
  -3  -1   9  610.53   38.26
  -3  -1   9  681.14   41.13
   3  -1  -9  622.19   39.28
   3   1  -9  605.98   48.62
   3  -1  -9  634.56   35.60
   3   1  -9  714.47   44.30
  -3   1   9  583.68   36.86
  -5   1  -2   89.57   14.59
   5  -1   2  136.59   28.17
   5   1   2  129.02   25.72
   5  -1   2   87.92   18.18
   5   1   2  129.66   31.04
  -5   1  -2  135.13   24.84
  -5  -1  -2  153.26   19.61
  -5  -1  -2   74.97   14.74
   5  -1   2  108.29   14.27
  -5  -1  -2  112.82   18.05
   3  -1   9  114.48   22.34
  -3  -1  -9  134.94   20.12
  -3   1  -9  119.68   35.30
   3  -1   9  134.88   20.96
  -3  -1  -9  161.73   23.36
  -3   1  -9  130.49   16.70
  -3  -1  -9  133.34   34.20
   3  -1   9   90.50   25.84
   3   1   9   84.83   18.76
  -3   1  -9  158.31   21.78
   3   1   9  135.94   33.00
  -3  -1  -9  101.00   21.10
   3   1   9   93.54   25.25
  -3   1  -9  108.04   16.42
  -2   3   8 1849.70   80.39
   2   3  -8 1640.43   66.86
  -2  -3   8 1762.63   84.60
   2   3  -8 1673.65   76.10
   2   3  -8 1722.13   76.36
   2   3  -8 1762.08   72.78
  -2  -3   8 1856.40   83.52
   2  -3  -8 1825.57   78.76
  -2   3   8 1753.31   78.46
   0  -5   0    3.81    3.65
   0  -5   0    4.79    5.15
   2  -3   8  989.25   57.60
  -2  -3  -8 1047.59   62.00
  -2  -3  -8 1049.79   65.36
   2   3   8 1009.76   62.53
   2   3   8 1038.81   59.10
   2   3   8 1073.59   62.42
  -2  -3  -8 1062.13   65.04
  -2   3  -8  986.90   55.67
   2  -3   8 1053.57   64.81
   2  -3   8  985.08   61.25
  -3  -4   2 3036.49  129.97
  -3   4   2 2989.65  120.76
  -3  -4   2 2827.72  116.85
   3  -4  -2 3041.89  126.00
   3  -4  -2 2851.01  119.96
   3   4  -2 3050.25  126.98
   3  -4  -2 2787.12  120.04
   3  -4   2 1839.54   80.59
  -3  -4  -2 1825.26   84.94
  -3  -4  -2 1802.99   81.02
  -3  -4  -2 1826.25   79.52
   3   4   2 1810.47   78.14
   3  -4   2 1717.66   74.35
  -1   1  11  501.13   33.09
  -1  -1  11  521.61   32.00
   1   1 -11  552.72   50.75
   1  -1 -11  555.44   36.41
  -1  -1  11  627.78   39.63
   1  -1 -11  610.69   43.72
   1   1 -11  597.89   37.15
  -4  -1   7   51.55   14.62
   4  -1  -7   54.92   13.53
  -4   1   7   26.96   18.07
   4  -1  -7   49.28   11.68
   4   1  -7   46.55   10.94
  -4  -1   7   66.06   14.79
   4  -1  -7   22.07   10.78
   4   1  -7   64.73   14.21
  -4   1   7   43.71    7.82
  -4  -1   7   93.25   17.70
  -4   1   7   62.01   10.84
   1  -1  11 1779.38   78.94
   1   1  11 1974.03   84.55
   1   1  11 2021.65   91.08
   1  -1  11 1882.77   80.84
   1  -1  11 2094.20   93.07
  -1   1 -11 1935.40   84.73
  -1  -1 -11 1921.60   86.86
  -1   1 -11 2135.56   99.08
   1   1  11 1961.77   87.08
   0   5   1  990.48   58.18
   0   5  -1  980.82   67.58
   0  -5   1 1046.40   60.30
   0  -5  -1 1032.83   62.94
   0  -5  -1 1004.67   57.64
   0  -5   1 1144.38   67.14
  -4  -1  -7  191.48   27.63
   4  -1   7  165.06   34.74
  -4   1  -7  220.82   25.94
  -4   1  -7  186.30   28.97
   4   1   7  244.56   31.82
  -4  -1  -7  272.38   53.88
  -4  -1  -7  218.66   38.90
  -4   1  -7  172.03   28.26
   4   1   7  196.82   23.03
   4  -1   7  236.07   39.06
   0  -4   7  204.32   25.64
   0   4   7  255.05   48.77
   0  -4  -7  218.16   29.11
   0   4  -7  184.74   41.62
   0  -4  -7  232.01   27.85
   0  -4   7  236.88   29.46
   0  -4  -7  203.92   23.92
   0  -4   7  208.55   23.79
   0   4   7  241.26   31.94
  -1  -3   9  816.03   48.89
  -1  -3   9  704.34   54.96
   1   3  -9  720.41   39.09
   1   3  -9  672.12   42.22
   1  -3  -9  763.51   41.91
  -1   3   9  688.63   37.76
  -1   3   9  702.62   43.11
   1  -3  -9  687.86   43.20
   1   3  -9  652.04   45.41
  -1  -3  -9 5908.37  240.57
   1  -3   9 5651.02  230.94
  -1  -3  -9 5918.92  245.90
  -1  -3  -9 6215.77  255.62
   1  -3   9 5803.11  234.88
   1   3   9 5887.87  244.07
  -1   3  -9 5619.87  226.94
   1  -3   9 6436.79  264.78
   1   3   9 5813.24  235.08
  -4  -3   3 4428.55  180.27
   4  -3  -3 4664.81  189.58
   4  -3  -3 4439.75  179.93
  -4   3   3 4691.75  192.96
   4  -3  -3 4309.58  178.25
   4   3  -3 4742.10  193.90
  -4  -3   3 4854.78  204.71
  -4  -3  -3 2120.03   89.76
  -4  -3  -3 2000.12   96.00
   4   3   3 2001.63   95.52
  -4   3  -3 1780.57   78.25
  -4  -3  -3 1853.33   80.17
   4  -3   3 1928.00   84.58
  -4   3  -3 1937.73   82.00
  -4   3  -3 1975.25   85.65
   4  -3   3 1928.77   87.62
   4   2  -6  131.35   39.37
  -4  -2   6  124.59   32.41
  -4   2   6  117.01   15.63
  -4   2   6  179.12   34.93
   4  -2  -6  138.67   20.66
  -4  -2   6  163.38   25.39
   4  -2  -6  192.32   32.86
   4  -2  -6  193.49   41.86
   4   2  -6  193.70   25.83
   4  -2   6  195.25   47.32
   4   2   6  200.72   28.71
   4  -2   6  193.70   23.06
  -4   2  -6  189.72   23.89
  -4   2  -6  172.68   31.44
  -4   2  -6  256.22   47.40
  -4  -2  -6  174.16   25.85
  -4  -2  -6  187.61   28.36
   4   2   6  171.14   29.55
   0  -5  -2    3.26    4.10
   0   5   2   14.42    6.94
   0  -5   2   15.20    3.98
   0   5  -2   10.73    3.77
   0  -5  -2    8.15    5.29
   0  -5   2   10.99    6.69
   0  -5  -2    5.09    8.26
   0  -5  -2   16.47    6.72
  -5  -1   3  509.86   32.27
  -5   1   3  498.39   27.50
  -5   1   3  541.20   32.15
   5  -1  -3  486.08   30.08
   5   1  -3  453.07   28.66
   5   1  -3  450.06   28.32
  -5  -1   3  544.83   35.54
   5  -1  -3  466.35   25.85
   5  -1  -3  457.30   30.21
  -5  -1   3  490.68   30.46
   5  -1  -3  404.75   52.25
  -5  -1  -3  933.28   67.88
   5   1   3  874.53   52.51
   5  -1   3 1087.81   66.19
  -5   1  -3  852.27   60.74
   5  -1   3  868.99   47.45
   5   1   3  898.96   50.69
   5  -1   3  829.29   50.53
  -5  -1  -3  981.13   54.10
  -1  -5   0  801.87   46.24
  -1   5   0  665.05   48.92
  -1  -5   0  811.42   50.33
   1  -5   0  808.00   54.13
   1  -5   0  770.90   42.80
   1   5   0  655.35   42.88
   3  -4  -3  500.29   39.46
   3  -4  -3  472.68   27.96
   3  -4  -3  521.33   32.55
  -3  -4   3  529.51   33.31
   3   4  -3  469.51   33.85
  -3   4   3  494.64   31.59
  -3  -4   3  523.27   35.62
   3   4  -3  519.22   31.40
   3   4   3 1875.07   89.61
  -3  -4  -3 1724.64   75.16
   3  -4   3 1904.37   84.54
  -3  -4  -3 1918.23   86.12
   3  -4   3 1825.78   79.09
  -3  -4  -3 1983.37   86.30
   1  -5  -1  363.94   40.52
  -1   5   1  335.39   41.14
  -1  -5   1  338.40   43.65
   1  -5  -1  357.45   42.54
  -1  -5   1  361.41   40.20
  -1  -5  -1  196.21   29.34
  -1  -5  -1  212.24   32.86
   1  -5   1  166.23   34.53
  -1   5  -1  164.27   21.97
   1   5   1  182.81   38.20
  -1   5  -1  190.02   24.53
   5   0  -4   13.24    8.15
   5   0  -4    3.61    4.52
  -5   0   4    0.16    4.89
  -5   0   4   -7.01    3.27
   5   0  -4    7.45    6.30
   5   0   4    4.93    3.19
   5   0   4    7.59    7.10
  -5   0  -4   20.53   10.90
  -5   0  -4    2.50    3.48
  -1   4   7 1122.51   64.34
  -1  -4   7 1293.10   76.85
   1  -4  -7 1194.73   65.86
  -1   4   7 1149.31   63.76
   1  -4  -7 1284.52   74.04
  -1  -4   7 1168.38   68.73
   1   4  -7 1260.26   70.95
  -1  -4  -7   20.00    6.39
  -1  -4  -7   14.91   15.66
   1  -4   7   31.46    5.75
   1  -4   7   26.79   10.59
  -1  -4  -7   15.16    3.05
   1   4   7   24.38    6.86
  -1  -4  -7   20.47   18.49
   1  -4   7   26.87    9.31
   1   4   7    9.29    7.64
  -2  -4   6 3934.98  165.27
   2   4  -6 3277.84  155.94
   2  -4  -6 3452.46  140.36
   2  -4  -6 3558.04  150.44
  -2   4   6 3477.19  144.75
  -2   4   6 3536.61  145.02
   2  -4  -6 3394.63  138.13
   2   4   6  428.48   48.16
   2  -4   6  477.87  121.81
  -2  -4  -6  398.95   50.63
   2   4   6  500.45   67.68
   2  -4   6  425.24   51.73
  -2  -4  -6  462.53   39.58
   2  -4   6  449.51   29.88
  -2  -4  -6  555.32   47.72
  -2  -4  -6  511.52   33.82
   2  -4   6  498.27   32.65
   1  -5  -2   84.16   18.80
   1  -5  -2   83.05   14.38
  -1   5   2   62.58   14.53
  -1  -5   2   72.87   25.93
   1  -5  -2   62.72   27.11
  -1  -5   2   97.48   16.20
   1   5  -2   72.65   20.05
  -1  -5  -2 1342.51   79.99
  -1   5  -2 1359.48   72.80
   1   5   2 1360.27   77.86
  -1  -5  -2 1434.55   89.46
  -1  -5  -2 1370.36   79.07
   1  -5   2 1532.84   76.01
  -1   5  -2 1461.21   81.94
   3  -3  -7 1900.79   82.03
  -3  -3   7 1954.22   87.86
  -3   3   7 1790.11   85.24
   3  -3  -7 1715.19   69.87
   3   3  -7 1867.41   77.60
  -3   3   7 1783.21   74.36
  -3   3   7 1893.67   82.80
   3  -3  -7 1704.98   68.58
  -3  -3   7 2057.97   92.40
  -3  -3   7 2001.93   89.16
   3   3  -7 1726.28   79.78
   0  -5  -3  942.77   59.10
   0  -5  -3  928.63   55.57
   0  -5  -3  921.00   56.73
   0   5   3  896.20   53.29
   0  -5  -3  911.24   52.39
   0   5  -3  978.76   57.25
   0  -5   3 1016.18   66.04
   3   3   7    7.17    6.67
   3   3   7    3.08    6.20
   3  -3   7   13.85    5.87
  -3  -3  -7    4.58    5.87
   3  -3   7    2.91    5.79
  -3  -3  -7   16.15   12.32
   3  -3   7    1.99    4.32
  -3   3  -7    4.38    7.47
   3   3   7   12.79   10.70
   4  -3  -4   36.02   11.05
  -4  -3   4    6.46   12.02
   4   3  -4   32.44    6.25
   4  -3  -4   39.98    6.68
  -4  -3   4   24.67    9.47
  -4   3   4   33.84    6.74
   4  -3  -4   31.81    6.47
  -4   3   4   24.59    8.03
  -4  -3  -4    3.87    7.68
  -4  -3  -4   11.15    8.23
  -4   3  -4   -0.06    2.58
  -4   3  -4    2.53    3.79
   4   3   4    1.67    9.44
  -4  -3  -4   -0.62    4.19
  -4   3  -4   19.18    7.44
   4  -3   4    9.96    5.28
   4  -3   4    5.61    4.89
   2   2 -10  584.87   42.68
  -2  -2  10  671.05   41.42
   2   2 -10  598.63   39.00
   2   2 -10  503.97   37.56
  -2  -2  10  565.73   35.72
   2  -2 -10  579.95   37.57
  -2   2  10  576.47   35.56
  -2   2  10  555.59   47.04
  -2  -2 -10  359.60   53.83
  -2  -2 -10  442.36   31.01
  -2   2 -10  410.23   49.77
  -2  -2 -10  385.62   43.40
  -2   2 -10  409.24   47.04
   2  -2  10  440.22   36.03
   2   2  10  396.48   63.94
   2   2  10  386.18   43.85
   2  -2  10  338.06   39.67
   2  -2  10  321.69   41.78
  -2  -2 -10  341.02   39.58
  -2   0  11    2.05    3.52
   2   0 -11   -0.43    7.24
   2   0 -11    3.48    6.78
  -2   0  11    2.77    2.66
  -2   0  11    3.60    5.67
   2   0  11    9.08    7.91
  -2   0 -11    0.34    4.37
   2   0  11    7.82    6.56
   2   0  11    0.99    6.71
  -2   0 -11    4.27    5.45
   2   0  11   -2.60    6.04
   4   0  -810876.88   61.72
  -4   0   810521.88  422.72
   4   0  -810037.47  402.86
  -4   0   811195.19   87.77
  -4   0   810960.80   60.31
   5  -2   0 1539.43   62.42
  -5   2   0 1705.28   85.49
   5  -2   0 1444.56   82.00
   5   2   0 1638.75   73.49
  -5  -2   0 1497.74   31.34
  -5  -2   0 1558.88   66.73
   5  -2   0 1519.56   69.87
  -5  -2   0 1721.62   75.46
  -4   0  -8 2930.20  127.75
  -4   0  -8 3377.04  144.05
   4   0   8 2931.75  121.72
  -4   0  -8 2974.29  125.60
   4   0   8 3093.22  130.59
   5  -1  -4  594.73   50.69
   5  -1  -4  607.60   48.02
   5   1  -4  621.52   39.51
   5   1  -4  552.45   42.82
  -5   1   4  659.80   38.66
  -5  -1   4  673.02   41.34
  -5   1   4  621.47   35.34
   5  -1  -4  575.56   33.62
  -5  -1   4  611.28   40.04
   5  -1  -4  514.91   33.80
   5   1   4   30.36    6.07
   5   1   4   23.94   16.82
   5  -1   4   22.24    5.06
  -5   1  -4   16.40    9.73
  -5  -1  -4   31.93   13.73
  -5   1  -4   38.01    9.23
  -5  -1  -4   38.46    5.78
   5  -1   4   29.59   16.46
   0  -2  11   28.54    5.98
   0   2  11   41.87    8.97
   0   2 -11   39.41   11.45
   0  -2  11   38.89    8.67
   0   2  11   31.92   10.00
   0  -2 -11   31.72   24.12
   5  -2  -1  832.42   47.19
   5  -2  -1  847.26   51.35
  -5  -2   1  832.74   48.61
   5   2  -1  913.23   56.43
   5  -2  -1  840.82   44.96
  -5  -2   1  928.81   67.84
  -5   2   1  882.32   53.49
   5  -2  -1  865.38   52.37
  -5   2  -1  293.64   45.46
   5  -2   1  281.23   33.04
   5  -2   1  281.87   44.29
  -5  -2  -1  308.15   39.61
  -5  -2  -1  311.69   36.00
   5  -2   1  296.23   37.84
   5   2   1  307.42   54.24
  -5  -2  -1  257.57   32.70
   3  -4  -4  614.72   38.48
   3  -4  -4  626.18   38.63
   3  -4  -4  588.98   40.80
  -3   4   4  627.57   36.20
   3   4  -4  554.17   34.90
   3   4  -4  635.32   36.26
  -3  -4   4  598.25   36.48
  -3  -4   4  625.87   46.42
  -3  -4  -4   62.13   12.63
   3  -4   4   95.02   21.25
  -3  -4  -4   86.04   18.14
   3   4   4   94.34   30.77
   3  -4   4   62.07   12.35
  -3  -4  -4  114.71   15.59
   3   0 -10    8.60    3.96
  -3   0  10    6.36    4.83
  -3   0  10    1.08    3.77
   3   0 -10    2.74    2.55
  -3   0  10    8.35    7.99
   3   0  10   -8.60    5.20
  -3   0 -10    1.95    9.53
  -3   0 -10   -1.25    4.62
   3   0  10    6.47    5.05
  -3   0 -10   21.34    7.63
  -1  -5   3  157.08   24.63
   1  -5  -3  199.31   24.37
   1  -5  -3  187.36   27.01
   1   5  -3  153.11   22.25
  -1  -5   3  190.01   25.48
   1  -5  -3  181.07   25.74
  -1   5   3  193.50   43.99
  -1  -5  -3   78.41   24.91
  -1  -5  -3   43.81   13.87
  -1  -5  -3   44.77   12.84
  -1   5  -3   63.27    9.91
   1  -5   3   36.33   10.38
   1   5   3   44.66   10.43
   0   0  12  168.07   23.08
   0   0 -12  240.35   30.79
   0   0  12  266.77   46.20
   0   0 -12  180.73   45.41
   5  -2  -2  133.56   32.23
  -5  -2   2  118.84   37.82
   5   2  -2   99.51   31.08
  -5  -2   2  136.48   19.86
   5  -2  -2  104.95   21.78
  -5   2   2  134.41   34.97
   5  -2  -2   82.48   16.36
   5  -2  -2  125.89   18.09
  -3  -2   9 1028.34   58.51
  -3   2   9 1130.59   72.87
  -3  -2   9 1268.78   72.47
   3   2  -9 1117.40   63.52
  -3   2   9 1025.46   60.10
  -3  -2   9 1087.19   71.82
   3  -2  -9 1219.60   73.34
  -5   2  -2  581.00   37.43
  -5  -2  -2  538.47   34.92
   5   2   2  543.11   35.11
  -5  -2  -2  483.03   39.18
   5  -2   2  529.89   33.85
  -5  -2  -2  525.13   31.67
   5  -2   2  477.76   54.32
   5  -2   2  495.23   30.96
  -5   0   5   99.17   18.15
  -5   0   5   65.37   26.40
   5   0  -5   65.14   29.14
   5   0  -5   73.17   15.86
   5   0  -5   65.25   13.54
   3  -2   9 1508.13   69.26
  -3  -2  -9 1693.90   76.78
  -3  -2  -9 1552.90   74.45
  -3   2  -9 1626.21   74.57
   3  -2   9 1701.15   73.40
   3  -2   9 1584.26   77.40
   3   2   9 1617.62   77.51
   3   2   9 1695.73   77.13
   3   2   9 1594.07   70.31
  -3  -2  -9 1748.17   82.15
  -3   2  -9 1678.69   79.17
  -5   0  -5 4900.23  206.98
   5   0   5 5098.51  206.25
  -5   0  -5 5383.56  217.43
   5   0   5 5226.55  216.45
  -2   1  11  283.88   32.15
   2   1 -11  265.85   33.97
   2  -1 -11  278.48   34.88
  -2   1  11  226.92   49.08
  -2   1  11  360.51   42.89
   2   1 -11  280.05   37.34
   2  -1 -11  296.39   51.12
  -2  -1  11  281.64   35.25
  -2  -1  11  282.52   38.47
  -2  -1 -11   92.77   29.70
   2  -1  11   67.74   27.34
  -2  -1 -11  115.85   16.66
   2   1  11   90.61   19.59
   2   1  11   77.95   15.14
  -2   1 -11  105.20   21.79
  -2  -1 -11   84.36   18.22
   2  -1  11   87.05   24.51
  -2   1 -11  107.80   46.85
   2  -1  11  110.68   22.48
  -4  -1   8 1458.64   87.09
   4  -1  -8 1403.98   80.86
  -4   1   8 1516.34   63.03
  -4   1   8 1725.92   77.28
  -4   1   8 1586.96   73.69
   4  -1  -8 1596.89   67.91
  -4  -1   8 1571.07   67.53
  -4  -1   8 1607.88   73.37
   4  -1  -8 1485.69   22.45
   4   1  -8 1395.98   79.09
   0  -5   4  235.81   36.78
   0  -5  -4  264.31   37.00
   0  -5  -4  208.04   28.06
   0   5   4  199.09   27.11
   0  -5  -4  219.38   36.18
   0   5  -4  236.10   32.45
   0  -5  -4  208.30   26.94
   4  -1   8 1812.81   84.04
  -4  -1  -8 1920.52   84.98
  -4   1  -8 1801.31   78.24
  -4  -1  -8 1776.68   89.03
   4  -1   8 1658.47   74.71
  -4   1  -8 1558.79   87.01
  -4  -1  -8 1697.63   76.26
  -4   1  -8 1725.91   75.31
   4   1   8 1791.47   82.28
  -4  -1  -8 1762.53   81.19
   4   1   8 1758.31   77.09
  -1   2  11  614.76   34.73
  -1  -2  11  595.87   36.78
  -1  -2  11  639.42   56.61
   1  -2 -11  646.11   42.46
  -1   2  11  607.00   33.39
   1   2 -11  582.91   36.07
   1   2 -11  555.90   47.75
  -4   2   7  250.74   34.71
   4  -2  -7  262.51   33.74
  -4   2   7  279.16   41.04
   4   2  -7  276.65   33.72
  -4  -2   7  311.08   58.27
   4  -2  -7  217.02   29.71
  -4  -2   7  229.16   32.15
   4  -2  -7  259.51   31.26
  -4  -2   7  249.71   37.86
   4   2  -7  190.55   27.99
  -1  -2 -11   88.39   34.07
  -1  -2 -11  141.87   22.97
   1   2  11  121.17   18.18
  -1   2 -11  115.05   16.73
  -1   2 -11  137.73   21.80
   1   2  11  113.53   30.37
   1  -2  11  138.34   21.06
   0  -3  10  133.88   22.07
   0   3  10  164.58   24.22
   0   3  10   87.99   20.69
   0  -3 -10  141.69   19.48
   0   3 -10  120.27   17.81
   0  -3 -10  119.71   38.86
   0  -3  10  142.71   22.24
   0  -3  10  141.11   32.74
   0  -3 -10  128.61   21.19
   0   3  10  112.77   17.58
   4  -2   7  307.78   43.08
   4   2   7  311.89   36.12
  -4  -2  -7  322.11   45.61
   4   2   7  273.29   37.59
  -4   2  -7  300.36   47.26
   4  -2   7  276.96   34.27
  -4  -2  -7  308.98   46.54
  -4   2  -7  373.72   42.95
  -4   2  -7  262.86   35.53
  -4  -2  -7  302.81   35.68
  -2  -3   9 1016.45   58.72
  -2   3   9  924.99   68.56
   2   3  -9  933.14   54.76
   2   3  -9  941.99   51.08
  -2   3   9  969.16   62.09
  -2  -3   9 1143.29   68.01
   2  -3  -9 1081.46   63.55
  -2   3  -9  455.59   29.12
  -2  -3  -9  546.97   44.44
   2  -3   9  413.58   47.16
   2   3   9  425.34   50.96
   2   3   9  494.22   37.26
  -2  -3  -9  459.39   42.20
  -2  -3  -9  458.18   35.10
   2  -3   9  404.51   45.37
   0  -4   8  165.57   29.59
   0  -4   8  125.44   38.93
   0  -4   8  164.17   20.62
   0  -4  -8  133.71   23.03
   0   4   8  142.57   20.71
   0  -4  -8  100.65   35.18
   0  -4  -8  151.02   23.99
   0   4   8  126.61   32.99
   0   4  -8  137.13   18.61
  -3   1  10  445.57   19.89
  -3  -1  10  456.87   29.20
  -3   1  10  465.49   29.90
  -3  -1  10  371.56   45.44
   3   1 -10  442.94   27.19
  -3  -1  10  498.90   37.80
  -3   1  10  465.64   27.11
   3   1 -10  560.77   43.88
   3  -1 -10  500.50   34.15
  -3  -1 -10  112.95   29.53
   3   1  10   70.87   27.01
   3  -1  10   74.21   15.38
   3   1  10   82.04   27.26
  -3  -1 -10  110.09   26.97
  -3  -1 -10  131.44   32.53
  -3   1 -10  137.63   34.35
   3  -1  10   73.03   17.72
  -3   1 -10  118.82   18.22
  -3   1 -10   96.98   19.85
   3  -1  10   69.24   22.16
   3   1  10   68.34   32.80
   4  -3  -5  262.23   31.01
   4  -3  -5  280.80   33.37
   4  -3  -5  288.10   40.34
  -4   3   5  286.55   36.31
  -4   3   5  321.89   36.11
  -4   3   5  328.70   43.62
  -4  -3   5  319.80   39.78
  -4  -3   5  371.36   42.91
   4   3  -5  300.10   34.44
   1   0 -12   -2.25    8.86
  -1   0  12    2.93    2.43
   1   0 -12    2.21    3.77
  -1   0  12    7.96    6.68
  -4   3  -5    2.26    5.22
   4  -3   5    7.95    3.36
  -4  -3  -5    8.46    7.45
   4  -3   5    2.49    3.55
  -4  -3  -5    6.48    4.79
   4   3   5    3.91    6.90
   4   3   5   16.78    6.46
  -4   3  -5    9.47    2.61
   1   0  12    3.53    3.55
  -1   0 -12   -0.05    4.55
   1   0  12   10.29    5.11
  -1   0 -12    2.36    8.55
   0   1  12    2.26    2.28
   0  -1 -12    9.19    6.53
   0  -1  12   -1.47    6.08
   0   1 -12    5.00    6.66
   0   1  12    6.82    4.33
   0  -1  12   15.16   11.04
   0  -1 -12    8.85    7.17
   0   1  12    4.97    5.53
   0   1 -12    7.75    5.00
  -2  -5   0  300.71   40.34
  -2  -5   0  269.48   32.05
   2  -5   0  244.41   33.91
   2   5   0  297.67   35.75
   5  -2  -3  115.03   21.83
  -5  -2   3  154.22   39.37
   5   2  -3  149.33   21.61
  -5   2   3  177.66   23.78
   5  -2  -3  156.42   22.94
   5  -2  -3  147.79   36.68
  -5  -2   3  142.21   23.55
   5  -2  -3  146.85   30.48
  -5  -2  -3 1683.59   77.00
  -5  -2  -3 1579.35   66.81
   5  -2   3 1534.16   74.05
   5   2   3 1569.07   70.22
  -5   2  -3 1476.21   34.89
   5  -2   3 1532.21   64.95
   2  -5  -1   42.56   14.01
  -2   5   1   43.08    5.05
   2   5  -1   48.84   10.79
  -2  -5   1   67.21   17.67
  -2  -5   1   28.76    9.85
  -2  -5  -1 2457.63  122.38
   2  -5   1 2377.94  107.18
   2   5   1 2453.55  104.95
  -2  -5  -1 2208.89   96.81
   5  -1  -5 6415.56  258.95
   5  -1  -5 7129.95  291.38
   5  -1  -5 6446.21  263.91
  -5   1   5 6515.66  261.19
  -5   1   5 6893.90  278.18
   5  -1  -5 6667.19  267.42
   5   1  -5 6376.83  260.04
  -5  -1   5 6650.08  267.47
  -5  -1   5 6975.79  283.15
   5   1  -5 7235.93  298.42
  -5   1  -5   10.91    8.02
   5   1   5    8.66    9.81
   5   1   5    2.71    4.95
  -5  -1  -5   15.92    7.88
   5  -1   5    2.66    1.91
   5  -1   5    2.10    5.06
  -5  -1  -5    5.36    3.40
  -5   1  -5    1.90    1.49
  -1  -5   4 2817.93  129.81
  -1   5   4 2645.33  111.44
  -1  -5   4 2537.99  103.18
   1  -5  -4 2696.75  112.55
   1  -5  -4 2558.81  115.50
   1   5  -4 2646.80  115.98
   1  -5  -4 2793.40  115.48
  -1  -5  -4  695.67   43.79
  -1  -5  -4  698.77   44.30
   1  -5   4  714.88   48.32
   1   5   4  674.74   42.03
  -1  -5  -4  577.76   39.11
  -1  -5  -4  720.21   44.49
  -1   5  -4  692.13   41.96
   1  -5   4  633.00   37.34
  -2  -4   7 2427.60  111.73
   2  -4  -7 2141.54   96.70
  -2   4   7 2091.32   92.99
  -2   4   7 2122.10   94.87
   2  -4  -7 2087.11   85.90
  -2  -4   7 2125.38   93.35
   2  -4  -7 2078.99   84.27
   2   4  -7 2037.31   89.06
  -3   4   5   35.14    8.00
   3   4  -5   30.80    6.89
  -3  -4   5   14.07    5.21
   3   4  -5   39.93    7.95
   3  -4  -5   17.05   15.25
  -3  -4   5   23.10   17.02
   3  -4  -5   28.84    9.81
   3  -4  -5   36.10    6.76
  -3   4   5   35.66    5.84
   2  -4   7 4269.09  175.76
  -2  -4  -7 4582.30  192.58
   2   4   7 4053.51  167.83
  -2   4  -7 3994.79  163.42
  -2  -4  -7 4385.71  182.19
   2  -4   7 4195.25  171.27
  -2  -4  -7 3995.37  169.54
   2   4   7 4437.41  185.46
   2  -4   7 4110.57  168.29
  -3  -4  -5  477.52   33.65
   3  -4   5  434.97   19.81
  -3  -4  -5  425.61   51.52
   3   4   5  435.78   49.13
  -3  -4  -5  341.87   39.03
  -1  -3  10 1246.68   71.31
  -1   3  10 1286.96   69.05
   1   3 -10 1320.49   70.85
  -1   3  10 1257.73   79.25
  -1  -3  10 1442.39   88.61
   1   3 -10 1420.77   80.87
   1  -3 -10 1320.71   76.44
  -1  -3 -10 1023.83   59.86
  -1  -3 -10 1014.36   61.48
  -1  -3 -10 1031.33   61.49
   1  -3  10  897.87  112.86
  -1   3 -10  924.01   54.64
   1  -3  10 1064.56   64.06
   1   3  10  997.97   58.98
  -1  -3 -10 1016.48   64.40
   1   3  10 1011.76   96.87
  -1  -4   8 1732.00   89.13
   1  -4  -8 1757.75   72.71
  -1   4   8 1816.45   87.71
  -1   4   8 1654.83   68.79
   1   4  -8 1780.17   79.17
  -1  -4   8 1828.12   90.71
   1  -4  -8 1780.69   79.01
   1   4   8  829.00   51.48
   1  -4   8  818.82   51.41
   1  -4   8  833.23   51.64
  -1  -4  -8  985.28   78.19
  -1  -4  -8  925.78   54.03
  -1  -4  -8  954.95   71.30
   1   4   8  917.48   52.05
  -1   4  -8  835.80   47.77
   1  -4   8  856.25   52.24
  -2  -5   2    2.10    3.13
   2  -5  -2    3.72    6.77
   2   5  -2    0.55    3.71
   2  -5  -2    3.98    5.01
  -2  -5   2    3.23    7.00
  -2  -5  -2   93.31   16.14
   2   5   2  111.90   32.15
  -2  -5  -2  131.05   34.38
   2  -5   2   94.80   24.33
  -2  -5  -2  141.86   20.35
  -1   1  12  100.21   25.24
   1   1 -12   90.39   26.68
  -1  -1  12  112.30   30.29
   1  -1 -12  111.73   30.06
  -1  -1  12  108.86   27.18
   1   1 -12  119.77   17.33
  -3   3   8 1862.35   77.39
   3  -3  -8 1926.42   86.46
  -3  -3   8 1901.47   86.91
  -3  -3   8 2072.35   90.33
  -3   3   8 1886.94   80.34
   3   3  -8 1940.09   82.61
  -3   3   8 1978.65   85.89
   1   1  12   58.14   11.59
   1   1  12   32.23    7.99
   1  -1  12   93.79   18.98
   1   1  12   32.17    6.58
  -1  -1 -12   48.17   16.85
  -1   1 -12   55.82   26.46
  -1   1 -12   34.17   15.91
   1  -1  12   52.51   10.85
  -3   3  -8 2574.49  110.53
   3  -3   8 2674.20  114.39
  -3  -3  -8 2693.53  115.55
  -3  -3  -8 2661.30  113.26
   3   3   8 2628.62  115.02
   3  -3   8 2538.61  107.62
   3   3   8 2860.05  122.73
   3  -3   8 2623.69  115.41
  -3  -3  -8 3012.58  129.16
   0   5   5 1587.01   78.56
   0  -5   5 1713.49   86.98
   0   5  -5 1506.10   72.65
   0  -5  -5 1631.96   71.25
   0  -5   5 1480.50   20.52
   0  -5  -5 1512.30   71.16
   0  -5  -5 1441.12   81.28
   0  -5  -5 1691.16   78.40
   5   0  -6   11.43    8.64
  -5   0   6   18.60    5.99
  -5   0   6   19.72    7.60
   5   0  -6   15.47    4.18
  -5   0  -6   10.73   10.18
   5   0   6   24.39   10.52
  -5   0  -6   34.19   19.12
   5   0   6    3.49    2.62
  -5   0  -6    0.33    2.79
  -5  -2   4 1147.54   66.18
  -5   2   4 1011.42   55.10
   5  -2  -4  984.14   53.41
   5  -2  -4  874.24   53.88
  -5  -2   4  945.04   55.54
   5  -2  -4  885.68   50.18
   5   2  -4 1025.74   57.97
   5  -2  -4  933.92   61.93
   5   2   4    7.78    3.42
  -5  -2  -4   16.41   10.44
   5   2   4    7.91   12.99
   5  -2   4   13.30   28.16
  -5   2  -4    8.80    5.12
  -5  -2  -4    0.62    5.13
   5  -2   4    2.70    1.44
   4   0  -9    4.82    5.40
  -4   0   9    9.47    6.41
  -4   0   9   23.18    9.46
   4   0  -9   -4.77   10.69
  -4   0   9    0.32    3.53
   4   0   9    9.78   10.24
  -4   0  -9   -2.79    7.08
   4   0   9   -5.72    5.50
  -4   0  -9   -2.84    7.30
  -4   0  -9   10.73    7.61
  -2  -5   3 1356.18   80.84
   2  -5  -3 1207.81   69.20
   2   5  -3 1282.15   72.99
  -2  -5   3 1302.58   72.96
   2  -5  -3 1222.08   72.02
  -2  -5  -3  917.75   55.66
  -2  -5  -3  932.00   57.17
  -2  -5  -3  994.03   60.01
   2  -5   3  903.52   71.60
   2  -5   3  853.96   45.95
   2   5   3  957.16   60.40
   2  -5   3  905.63   61.99
  -4   3   6 2763.31  115.65
   4  -3  -6 2479.35  100.92
   4   3  -6 2713.52  112.68
  -4  -3   6 2794.55  120.67
  -4   3   6 2586.30  107.90
  -4   3   6 2988.50  126.25
   4  -3  -6 2664.84  110.35
   4  -3  -6 2646.24  112.01
   4   3   6 2248.65  105.55
  -4  -3  -6 2384.08  102.17
   4  -3   6 2303.10  102.42
  -4   3  -6 2274.30   97.17
  -4  -3  -6 2492.87  106.42
   4   3   6 2276.65   98.65
  -4   3  -6 2269.34   97.35
   4  -3   6 2340.65   99.36
   1  -5  -5   54.66   11.77
   1   5  -5   69.52   17.92
  -1  -5   5   71.53   20.36
  -1  -5   5   75.85   11.46
  -1   5   5   71.04   11.42
   1  -5  -5   91.66   21.69
   1  -5   5  114.02   35.36
  -1  -5  -5  111.30   17.04
  -1  -5  -5   97.09   24.77
   1   5   5  105.03   27.48
   1  -5   5  112.80   23.46
  -1  -5  -5  134.67   31.48
  -1  -5  -5   73.89   22.73
  -1   5  -5  137.92   27.24
  -4  -4   0   -0.53    5.88
   4  -4   0   13.23    3.90
   4  -4   0   14.29    8.24
  -4  -4   0    7.77    5.87
   4  -4   0    9.13    3.75
   4   4   0   10.87    6.50
   2   2 -11   39.06   14.10
   2   2 -11   42.59   17.86
  -2   2  11   40.59    5.07
   2  -2 -11   82.81   35.14
  -2  -2  11   42.05    9.14
  -2  -2  11   54.13   15.48
   2   2 -11   41.78    9.10
  -2   2  11   56.21    7.51
  -2   2  11   12.12   13.75
  -2  -2 -11  695.60   47.49
  -2   2 -11  664.51   41.93
  -2  -2 -11  755.37   46.69
   2   2  11  718.45   50.86
   2  -2  11  720.74   45.89
  -2   2 -11  706.34   43.32
  -2  -2 -11  574.52   37.40
   2   2  11  678.18   40.34
  -2  -2 -11  685.53   42.35
   4   4  -1  782.30   47.37
  -4  -4   1  560.69   46.55
   4  -4  -1  754.91   47.45
   4  -4  -1  701.68   45.35
   4  -4  -1  659.05   37.90
  -4  -4   1  717.50   46.40
  -4  -4  -1 3103.24  136.54
   4  -4   1 2724.69  120.32
   4  -4   1 2734.47  111.36
   4  -4   1 3084.30  131.34
  -4  -4  -1 3045.85  127.29
   4   4   1 3127.02  137.20
  -4  -4  -1 3258.07  143.32
  -4   4  -1 2950.74  118.97
   5  -1  -6  204.35   29.51
   5  -1  -6  216.06   38.02
  -5  -1   6  220.18   35.22
  -5   1   6  217.59   29.52
   5   1  -6  145.46   40.45
  -5  -1   6  244.46   33.18
   5  -1  -6  254.39   50.37
   5   1  -6  226.09   29.54
  -5   1   6  218.58   28.11
   5   1   6 1137.62   65.07
   5  -1   6 1261.50   74.41
   5   1   6 1227.70   70.40
  -5   1  -6 1254.83   72.76
  -5  -1  -6 1270.22   70.90
   5  -1   6 1268.41   69.29
  -5  -1  -6 1274.76   82.46
  -5   1  -6 1263.44   72.06
  -5   1  -6 1263.06   71.46
   4  -2  -8 1661.25   73.63
  -4  -2   8 1730.89   75.72
   4  -2  -8 1591.04   73.93
  -4  -2   8 1913.88   83.09
  -4   2   8 1861.91   87.63
  -4  -2   8 2003.63   89.44
   4   2  -8 1785.44   81.23
   4   2  -8 1654.85   73.86
   4  -2  -8 1590.86   65.07
  -4   2   8 1825.98   78.53
  -4  -2  -8 1168.96   80.00
  -4  -2  -8 1117.13   65.96
  -4   2  -8 1104.58   68.92
  -4  -2  -8  995.82   60.83
   4   2   8 1098.49   86.15
   4  -2   8  992.93   59.41
   4   2   8  946.69   56.54
  -4   2  -8 1132.71   68.42
   4  -2   8 1037.19   71.20
  -4   2  -8 1072.74   61.15
   3  -4  -6 2132.57   93.64
  -3   4   6 2002.81   88.52
  -3  -4   6 2133.16   97.38
   3  -4  -6 1801.66   74.68
   3   4  -6 1906.54   79.13
  -3   4   6 1991.59   84.60
   3  -4   6 4480.76  184.10
   3   4   6 4389.64  188.18
  -3  -4  -6 4587.20  191.23
   3  -4   6 4273.92  173.31
  -3  -4  -6 4448.71  188.59
  -3   4  -6 4291.74  176.75
  -3  -4  -6 4113.33  178.34
   4   1  -9 1736.35   76.55
  -4   1   9 1733.65   72.54
   4   1  -9 1475.96   41.94
  -4  -1   9 1655.27   70.92
  -4  -1   9 1692.80   76.55
  -4   1   9 1741.37   78.64
   4  -1  -9 1604.18   66.62
  -4  -1   9 1787.61   81.44
  -4   1   9 1495.38   31.74
   4  -1  -9 1620.87   69.70
  -2   0  12  209.93   27.27
   2   0 -12  218.28   39.96
  -2   0  12  318.62   51.56
   2   0 -12  207.78   28.02
  -4   1  -9    4.55   12.06
   4  -1   9   21.00   12.40
   4   1   9    8.06    5.03
  -4  -1  -9   10.24    6.93
  -4   1  -9   15.87    7.26
   4   1   9   18.73   12.61
  -4  -1  -9   36.00   29.11
   4  -1   9    4.27    4.67
  -4  -1  -9   -1.82    3.45
  -4   1  -9   29.98    9.40
  -4  -1  -9   15.09   10.76
   2   0  12  720.25   51.90
   2   0  12  754.69   54.76
  -2   0 -12  744.12   57.91
   2   0  12  655.93   41.08
  -3   2  10  677.08   41.54
   3  -2 -10  874.89   54.26
  -3   2  10  741.83   56.44
  -3  -2  10  819.82   67.96
  -3  -2  10  727.31   60.08
   3   2 -10  683.47   44.10
   4  -4  -2  370.57   44.54
  -4  -4   2  355.56   45.40
   4  -4  -2  391.69   46.40
   4   4  -2  331.93   42.98
  -4  -4   2  402.17   59.85
   4  -4  -2  311.76   43.76
  -3   0  11  550.31   52.79
  -3   0  11  567.64   39.48
   3   0 -11  523.73   31.45
   3   0 -11  581.40   41.51
  -3   0  11  582.57   37.17
  -3  -2 -10   31.29    7.64
   3   2  10   53.81   30.98
  -3  -2 -10   46.67   10.80
   3  -2  10   60.95   23.62
   3  -2  10   45.18    7.75
  -3  -2 -10   40.85   15.02
  -3  -2 -10   98.04   25.31
  -3   2 -10   27.86    7.57
  -3   2 -10   44.45   18.73
   3   2  10   27.04    5.46
   3  -2  10   48.07    6.61
  -4  -4  -2   13.72    6.69
   4   4   2    5.78    9.55
  -4   4  -2   12.56    3.17
  -4  -4  -2    7.29    8.49
   4  -4   2    2.11    8.59
  -4  -4  -2    3.44    9.73
   0  -4   9 2223.12   97.57
   0  -4   9 1968.63   94.71
   0   4   9 2000.02   87.86
   0  -4  -9 1989.58   93.45
   0  -4  -9 1996.04   83.09
   0   4   9 1914.88   80.59
   0  -4   9 1934.97   79.89
   0   4  -9 1826.69   75.72
  -3   0 -11 1404.64   93.93
  -3   0 -11 1560.53   72.27
   3   0  11 1155.37   86.06
  -3   0 -11 1475.01  100.59
   0  -2 -12  602.70   48.65
   0  -2  12  545.55   47.35
   0   2 -12  587.81   52.03
   0  -2  12  490.01   44.44
   0   2  12  653.63   52.24
   0   2 -12  629.29   64.65
   0   2  12  547.48   48.70
   0  -2  12  658.10   52.53
   2   5  -4   23.41   13.24
   2  -5  -4    4.00    8.56
  -2  -5   4    8.30    3.03
  -2   5   4    4.51    3.58
  -2  -5   4   16.04    9.61
   2  -5  -4    8.27    6.43
  -2  -5  -4 1426.88   92.10
   2   5   4 1635.96   87.94
  -2  -5  -4 1645.72   76.42
   2  -5   4 1534.09   37.32
   2  -5   4 1497.53   92.58
  -2  -5  -4 1668.76   79.41
   2  -5   4 1425.33   96.73
   5  -2  -5  120.31   21.88
  -5  -2   5  178.54   30.63
  -5  -2   5  167.21   29.51
   5  -2  -5  189.34   21.29
   5  -2  -5  112.42   24.03
   5   2  -5  167.71   24.11
  -5   2   5  140.86   12.09
   2  -3 -10  573.80   64.11
  -2  -3  10  485.77   51.88
   2   3 -10  491.63   41.06
  -2  -3  10  498.09   61.91
  -2   3  10  527.10   53.99
   0  -5   6   20.61    4.82
   0  -5   6   10.94   25.92
   0  -5   6   29.54    7.96
   0  -5  -6   29.96    9.72
   0   5  -6   22.72    7.83
   0  -5  -6   30.82    7.26
   0  -5  -6    9.19   11.47
   0   5   6   30.72    8.20
   5  -2   5 2284.71  101.04
  -5  -2  -5 2463.12  114.88
  -5   2  -5 2289.51  104.01
   5   2   5 2195.96   97.90
  -5  -2  -5 2297.13  102.02
  -5   2  -5 2400.45  118.07
   5  -2   5 2237.18  108.67
   5   2   5 2268.11  108.03
  -2   3 -10 3973.40  173.33
  -2  -3 -10 4265.01  191.62
  -2  -3 -10 4513.03  204.39
   2  -3  10 4054.47  178.02
   2  -3  10 4282.55  187.29
   2   3  10 3987.27  178.20
  -2  -3 -10 4045.24  177.24
   2  -4  -8  328.81   40.46
   2  -4  -8  233.15   22.77
  -2  -4   8  259.65   39.62
  -2  -4   8  261.89   45.85
  -2   4   8  261.01   30.64
  -2  -4  -8  937.22   74.13
   2  -4   8  858.87   57.36
  -2  -4  -8  956.88   68.15
   2   4   8  832.04   56.43
   2  -4   8  831.21   54.54
  -2   4  -8  871.93   62.49
  -2  -4  -8  918.67   62.29
   2   4   8  867.03   73.40
   2  -4   8  780.30   51.35
   5   3   0 1566.25   74.37
   5  -3   0 1573.46   74.45
  -5  -3   0 1592.13   77.03
  -5  -3   0 1736.82   85.24
  -5  -3   0 1471.34   93.88
   5  -3   0 1594.42   80.45
   5  -3   0 1461.06   90.17
   5  -3   0 1452.07   92.08
  -5   3   0 1576.29   79.06
   0  -3  11  661.84   50.66
   0  -3 -11  664.81   48.82
   0  -3 -11  618.75   41.02
   0   3  11  601.01   15.45
   0  -3  11  572.36   55.41
   0   3 -11  639.87   41.12
   0  -3  11  619.83   40.95
   5   3  -1  315.96   30.41
   5  -3  -1  315.18   30.23
  -5  -3   1  318.86   31.74
  -5  -3   1  353.16   38.68
   5  -3  -1  333.57   30.45
  -5   3   1  361.02   51.33
   5  -3  -1  289.98   37.42
   5  -3  -1  348.79   42.84
  -5  -3  -1  671.91   50.40
   5  -3   1  508.51   44.63
  -5  -3  -1  606.26   22.42
  -5   3  -1  644.96   64.35
   5   3   1  589.57   53.46
   5  -3   1  564.66   60.58
  -5  -3  -1  670.24   45.25
  -2   1  12    1.83    7.81
   2  -1 -12   34.00    7.53
  -2  -1  12   22.57    8.33
  -2   1  12   32.39    8.45
   2   1 -12   44.91    8.97
   2   1 -12   15.80    8.09
  -2  -1  12   27.03   11.70
   2   1  12 2623.06  124.50
  -2   1 -12 2383.41  113.86
  -2  -1 -12 2819.57  130.76
   2   1  12 2455.70  111.07
   2  -1  12 2668.28  120.94
  -2   1 -12 2475.64  117.68
  -2  -1 -12 2625.13  120.74
   0   0  13   -3.62    5.98
   0   0 -13   14.59    7.09
  -1  -4   9  207.86   51.91
   1  -4  -9  181.66   15.51
   1   4  -9  143.32   29.34
  -1  -4   9  169.62   35.79
  -1   4   9  142.43   12.82
   1  -4  -9  231.21   23.68
  -1   4   9  177.86   14.51
   1  -4   9  115.50   41.45
  -1   4  -9  109.86   17.20
   1  -4   9   86.71    9.93
  -1  -4  -9  104.81   22.39
  -1  -4  -9  116.14   27.30
  -1  -4  -9  126.71   29.66
   1   4   9   92.23   17.98
  -5   0   7 4830.96  209.12
   5   0  -7 4769.94  206.29
  -5   0   7 4679.34  201.81
   5   0  -7 4282.07  187.01
   5   0  -7 5171.36  228.86
  -5   0   7 5021.49  222.85
  -4  -4   3  201.91   23.46
   4  -4  -3  196.16   22.80
   4   4  -3  208.48   27.80
  -4  -4   3  177.82   13.40
   4  -4  -3  190.11   32.19
  -4   4  -3 2322.14  101.19
   4  -4   3 2240.23  103.17
   4   4   3 2366.18  115.47
  -4  -4  -3 2334.34  107.27
  -4  -4  -3 2123.52   96.56
  -4  -4  -3 2368.80  115.44
   5   0   7 2148.16   95.01
   5   0   7 2491.50  118.41
  -5   0  -7 2277.62  106.14
  -5   0  -7 2388.37  114.53
  -5   0  -7 2458.13  116.44
  -5   0  -7 2350.54  105.48
   3   1 -11  713.44   61.93
  -3   1  11  746.81   47.09
  -3   1  11  668.28   48.53
   3  -1 -11  725.22   52.69
  -3  -1  11  810.25   57.63
   3   1 -11  673.47   46.10
  -3  -1  11  575.03   62.62
  -3   1  11  900.48   60.64
  -1  -2  12   95.54   22.73
  -1   2  12   78.20   12.28
  -1   2  12   74.84   11.43
   1   2 -12  114.00   30.03
  -1  -2  12   46.08   19.63
   1  -2 -12   60.66   18.05
   1   2 -12   74.83   12.54
   3   1  11 1913.74  101.41
   3  -1  11 1947.83   92.22
  -3  -1 -11 1958.42  101.01
  -3   1 -11 1875.56   93.57
  -3  -1 -11 1947.90   97.35
  -3  -1 -11 2023.37   96.34
  -1  -2 -12 1428.37   93.56
   1  -2  12 1447.96   91.84
   1   2  12 1393.50   95.69
   1   2  12 1344.47   85.65
  -1   2 -12 1531.04   53.90
  -1   2 -12 1442.15   91.82
   1  -5  -6 3185.69  146.24
   1  -5  -6 3030.96  132.83
  -1  -5   6 3228.27  145.73
   1   5  -6 3021.03  138.81
  -1   5   6 3096.41  138.39
  -1   5   6 3022.52  136.90
   1  -5   6 2120.63  103.09
   1  -5   6 1995.53   92.38
   1  -5   6 2012.75   89.22
  -1  -5  -6 2086.35  108.37
  -1  -5  -6 2014.37   93.26
   1   5   6 1906.21   93.28
   5  -3  -2 2404.09  107.12
   5  -3  -2 2635.13  116.44
  -5   3   2 2565.24  123.65
   5  -3  -2 2411.06  106.29
  -5  -3   2 2288.92  104.49
   5   3  -2 2838.16  126.09
  -5  -3   2 2663.61  124.55
   5  -3  -2 2559.34  118.04
  -3  -3   9  654.14   53.90
  -3  -3   9  623.49   45.31
  -3   3   9  545.83   48.41
   3  -3  -9  577.34   52.63
  -3   3   9  479.60   46.82
   3   3  -9  572.00   52.25
  -5  -3  -2  361.37   33.74
  -5   3  -2  391.90   43.80
   5  -3   2  431.68   67.76
   5   3   2  378.75   47.40
  -5  -3  -2  345.05   32.50
  -5  -3  -2  458.32   42.70
  -3  -3  -9 1395.33  100.75
   3  -3   9 1348.44   88.77
  -3   3  -9 1249.59   82.57
  -3  -3  -9 1390.98   94.31
   3   3   9 1296.72   87.85
   3  -3   9 1534.59   32.56
   3   3   9 1489.15   99.58
  -3  -3  -9 1408.65  100.50
  -1  -3  11   18.31    8.14
   1  -3 -11   47.11   18.29
  -1  -3  11   24.12    4.61
   1   3 -11   50.32    7.33
  -1   3  11   48.45    8.90
   4   3  -7 1467.18   93.25
  -4   3   7 1475.33   93.40
   4  -3  -7 1363.97   84.10
  -4   3   7 1429.70   89.15
   4  -3  -7 1429.96   91.90
  -4  -3   7 1483.83  106.73
  -4  -3   7 1520.96   38.43
  -4   3   7 1467.26  104.68
   1  -3  11 3846.98  171.78
  -1  -3 -11 3789.21  169.91
  -1   3 -11 3500.63  152.14
  -1  -3 -11 3554.75  155.65
  -1  -3 -11 3648.70  160.94
  -1  -3 -11 3698.42  168.05
   1   3  11 3521.99  153.31
   1   3  11 3615.09  172.08
   1  -3  11 3549.47  176.30
   1  -3  11 3639.29  158.95
   4  -3   7  158.30   30.96
  -4  -3  -7  167.02   22.68
  -4   3  -7  209.20   28.02
   4  -3   7  191.52   38.35
   4   3   7  181.21   20.85
  -4  -3  -7  190.49   20.63
  -4  -3  -7  168.23   31.38
  -6   0   0   78.90   22.55
   6   0   0  109.25   24.29
  -3  -5   0    5.05    7.56
   3  -5   0   11.84    6.87
  -3  -5   0   14.06    5.28
   3  -5   0    9.15    8.47
   3   5   0    3.91    6.55
   1   0 -13 1707.37   82.09
  -1   0  13 1665.59   85.59
  -1   0  13 1743.64   86.31
   1   0 -13 1582.44   75.75
   1   0  13  107.67   24.86
  -1   0 -13  108.39   32.69
   1   0  13  150.07   29.75
   6   0  -1    7.37    7.72
  -6   0   1    2.13    8.58
   6   0   1   -0.82    6.68
  -6   0  -1    4.52    8.60
   0  -1 -13  190.59   23.50
   0   1  13  164.65   17.42
   0   1 -13  227.75   33.30
   0   1  13  170.25   32.73
   0  -1  13  234.62   23.80
   0   1 -13  202.46   28.15
   0  -1  13  123.70   27.41
   0   1  13  156.44   15.57
  -2  -5   5 3525.80  151.37
  -2   5   5 3763.22  165.11
  -2  -5   5 4159.27  184.90
   2   5  -5 3641.52  164.53
   2  -5  -5 3709.65  165.79
   2  -5  -5 3611.85  161.21
  -5  -1   7 3909.53  169.42
  -5  -1   7 3800.71  167.54
  -5   1   7 3479.55  150.83
  -5   1   7 3676.19  159.74
   5  -1  -7 3430.59  148.83
   5   1  -7 3627.97  159.79
   5   1  -7 4010.47  179.42
  -5   1   7 3880.21  172.86
   5  -1  -7 3738.00  162.40
   3   5  -1   20.38    5.71
   3  -5  -1   10.53    4.89
  -3  -5   1   11.68   10.82
  -3  -5   1    3.61    4.14
   3  -5  -1   21.10    4.71
   3  -5  -1   23.79    7.45
  -2  -5  -5 1732.50   84.78
   2  -5   5 1551.46   74.24
  -2  -5  -5 1799.19   86.95
  -2  -5  -5 1959.69   91.33
   2   5   5 1810.73   96.78
   2  -5   5 1833.66   94.12
   2  -5   5 1589.41   71.41
   3  -5   1    7.27    5.37
  -3  -5  -1    6.51    4.15
  -3  -5  -1    4.11    6.10
   3   5   1    6.27    5.89
  -3  -5  -1   19.03    5.90
   3  -5   1    4.83    4.91
   5   1   7 1001.15   65.39
   5  -1   7 1002.26   67.46
  -5  -1  -7 1043.21   67.68
  -5  -1  -7 1190.87   79.05
   5  -1   7 1040.03   74.49
  -5   1  -7 1079.82   68.63
   5   1   7 1063.55   80.48
  -5   1  -7 1136.04   80.79
  -5  -1  -7 1187.84   79.65
  -5   1  -7 1131.22   77.50
   3  -4  -7  138.00   36.23
  -3   4   7   98.60   17.71
   3   4  -7  131.90   11.82
  -3  -4   7  142.80   17.32
  -3   4   7  152.78   29.19
   3  -4  -7  125.20   12.71
  -3  -4  -7  167.32   21.67
   3  -4   7  140.95   33.21
   3  -4   7  113.72   21.00
  -3   4  -7  147.61   32.30
   3   4   7  140.92   45.34
  -3  -4  -7  194.23   29.20
  -3  -4  -7  148.26   31.84
   3  -4   7  133.16   24.04
   5  -3  -3   68.11   19.96
  -5  -3   3   85.98   21.16
   5  -3  -3  123.80   25.21
  -5   3   3   71.65   11.20
   5  -3  -3  100.30   20.00
   5  -3  -3   86.94   18.38
  -5  -3   3  100.87   27.87
   5   3  -3   83.54   20.62
   5  -3   3 2016.69   93.18
   5   3   3 1826.34   86.62
  -5  -3  -3 1842.02   87.79
  -5  -3  -3 1858.77   85.41
   5  -3   3 1730.99   83.69
  -5   3  -3 2103.63   97.92
  -4  -4   4   60.08   16.15
   4   4  -4   38.66    6.69
   4  -4  -4   32.43   12.80
  -4   4   4   60.94    7.75
  -4  -4   4   32.71    8.44
   4   4   4  822.62   69.74
  -4   4  -4  814.22   52.38
  -4  -4  -4  860.24   60.97
   4  -4   4  789.12   61.50
  -4  -4  -4  873.23   59.49
  -4   0  10 4098.11  182.11
  -4   0  10 4365.70  190.52
   4   0 -10 4636.99  203.41
   4   0 -10 4087.10  177.34
  -4   0  10 4659.62  211.16
   5  -2  -6  706.56   63.74
   5  -2  -6  719.30   50.20
   5  -2  -6  751.92   48.42
  -5  -2   6  680.33   48.03
   5   2  -6  740.53   58.33
  -5   2   6  778.71   57.10
  -5  -2   6  815.92   55.28
  -5   2   6  711.55   53.13
   6   0  -2 1101.55   73.24
   6   0  -2  965.56   63.28
  -6   0   2 1147.44   74.37
   4   0  10 1185.93   79.26
  -4   0 -10 1260.44   82.84
  -4   0 -10 1078.15   70.24
   4   0  10 1165.46   76.49
  -4   0 -10 1237.08   95.12
  -5   2  -6  841.59   68.61
   5  -2   6  837.88   57.41
   5   2   6  832.77   71.40
  -5   2  -6  703.96   48.90
  -5  -2  -6  796.81   65.62
  -5  -2  -6  915.96   61.07
   5   2   6  794.39   53.22
   5  -2   6  935.86   76.54
   6   0   2    1.72    3.21
  -6   0  -2    3.35    1.34
  -6   0  -2   14.45    6.72
  -3  -5   2  242.59   23.42
   3  -5  -2  268.25   25.69
   3   5  -2  295.91   28.67
   3  -5  -2  250.45   26.00
  -3  -5   2  349.67   40.12
   3  -5  -2  332.70   31.10
  -3  -5  -2 2051.73   94.87
  -3  -5  -2 1976.26   96.82
   3   5   2 2012.84   94.78
  -3  -5  -2 1916.33   91.94
   3  -5   2 1928.97   89.78
   3  -5   2 2067.65  101.72
  -6   1   0 1553.23   74.73
  -6  -1   0 1665.29   79.99
   6   1   0 1659.59   86.20
   6  -1   0 1761.11   87.09
  -6  -1   0 1585.72   69.81
   4  -2  -9  127.46   28.76
  -4  -2   9  106.52   29.28
   4  -2  -9  224.60   33.35
  -4  -2   9  173.57   22.41
  -4  -2   9  163.29   45.46
   4   2  -9  129.14   32.21
   4  -2  -9  162.90   11.23
  -4   2   9  166.88   21.78
   4   2  -9  142.55   13.96
  -4   2   9  215.85   54.42
   4  -2   9 1493.67  100.24
  -4  -2  -9 1502.19  114.58
  -4  -2  -9 1418.61   93.13
  -4  -2  -9 1600.15   77.04
   4   2   9 1424.30   90.36
  -4   2  -9 1570.51   74.08
   4  -2   9 1423.66   97.33
  -4   2  -9 1493.93   95.17
   4   2   9 1498.90   98.56
   1   1 -13  298.09   28.59
  -1  -1  13  318.10   34.32
   1   1 -13  279.81   28.90
  -1   1  13  268.59   24.21
  -1  -1  13  334.73   35.53
   1  -1 -13  326.88   45.94
  -1   1  13  340.56   35.30
   0   5   7 7232.98  318.58
   0  -5  -7 7618.36   66.36
   0  -5  -7 7830.33   82.84
   0   5  -7 7221.48  314.00
   0  -5   7 7065.63  300.99
   0  -5   7 7987.38  109.51
   0  -5   7 7578.06   66.04
   0  -5  -7 7508.24  322.04
   1  -1  13  146.44   18.90
   1   1  13  124.20   17.82
  -1   1 -13  107.83   33.67
  -1   1 -13  132.43   27.46
   1   1  13  131.51   26.02
   1   1  13  156.39   39.20
  -1  -1 -13   84.76   27.07
   1  -1  13   89.36   13.17
   6  -1  -1  488.17   45.57
  -6   1   1  366.74   34.39
   6   1  -1  467.92   47.95
  -6  -1   1  383.99   51.05
   6  -1  -1  394.20   35.47
  -6  -1   1  468.50   40.15
   6  -1   1  364.08   68.83
  -6   1  -1  368.09   34.83
   6   1   1  384.01   35.58
  -6  -1  -1  344.61   31.53
  -6  -1  -1  392.44   36.35
   4   1 -10  284.64   41.22
  -4  -1  10  211.00   28.35
  -4   1  10  218.36   20.32
   4  -1 -10  197.40   19.84
  -4  -1  10  304.14   61.50
  -4   1  10  193.68   35.02
  -4  -1  10  181.86   28.25
  -4   1  10  259.67   30.44
   4  -1 -10  247.00   27.13
   4   1 -10  191.78   22.58
   6   0  -3    1.15    3.67
  -6   0   3    7.33    8.38
   6   0  -3    8.36    6.77
  -6   0   3    3.14    1.88
  -6   0  -3    0.68    1.36
   6   0   3    3.89    1.40
   6   0   3   -0.93    7.57
  -6   0  -3   12.81   12.70
  -6  -1   2 1736.15   82.28
   6   1  -2 1878.60   88.82
   6  -1  -2 1876.97   86.73
   6  -1  -2 2145.67  106.76
  -6  -1   2 1945.39   84.58
  -6   1   2 2130.39  102.51
   6  -1  -2 1833.40   83.81
  -4   1 -10  292.16   55.52
  -4   1 -10  277.07   38.86
   4  -1  10  228.05   32.90
  -4  -1 -10  234.44   39.40
   4   1  10  206.16   38.17
   4  -1  10  235.83   35.10
   4   1  10  219.94   48.68
  -4  -1 -10  207.10   45.11
  -4  -1 -10  207.96   25.94
  -4   1 -10  257.33   27.75
  -4  -1 -10  260.75   26.97
  -3  -5   3   26.52   14.17
   3  -5  -3   61.24   11.40
  -3   5   3   38.20    6.44
  -3   5   3   29.94    5.63
   3  -5  -3   17.04    9.78
   3  -5  -3   32.23    8.31
  -3  -5   3   28.79    5.56
   3   5  -3   32.09    6.73
  -6  -1  -2 2432.01  107.52
   6  -1   2 2473.08  120.80
  -6   1  -2 2487.85  115.10
  -6   1  -2 2530.03  117.97
  -6  -1  -2 2692.39  122.99
   6   1   2 2477.33  118.02
   3   5   3  235.93   54.30
  -3  -5  -3  235.00   31.16
  -3  -5  -3  211.44   21.11
   3  -5   3  155.82   41.52
  -3  -5  -3  198.65   25.71
   3  -5   3  144.39   34.12
  -5  -3   4 1133.08   75.54
   5  -3  -4 1137.11   72.00
   5  -3  -4 1154.01   74.98
   5  -3  -4 1231.58   76.90
  -5  -3   4 1378.14   88.53
  -5   3   4 1318.98   84.04
   5   3  -4 1329.45   86.30
   5  -3   4  960.07   77.19
  -5   3  -4 1002.38   68.39
  -5  -3  -4  955.05   68.36
  -5   3  -4  889.24   57.90
   5  -3   4  866.10   61.18
   5   3   4 1024.48   76.01
  -5  -3  -4 1118.91   73.90
   0  -4  10  206.39   56.77
   0   4  10  222.79   23.06
   0  -4 -10  270.43   28.68
   0  -4  10  256.40   23.94
   0  -4  10  240.68   42.00
   0   4 -10  226.71   22.58
   0  -4 -10  256.86   29.68
  -2   4   9  699.84   56.90
   2  -4  -9  733.91   63.00
   2  -4  -9  685.59   42.88
  -2  -4   9  625.56   45.17
  -2  -4   9  786.48   53.46
   2  -4   9  171.21   30.97
   2   4   9  261.33   68.49
  -2  -4  -9  235.12   33.12
   2  -4   9  128.26   17.67
  -2  -4  -9  187.36   19.31
   2  -4   9  161.22   14.33
   2   4   9  175.32   15.71
  -2  -4  -9  183.40   32.01
  -2   4  -9  181.60   16.57
  -1  -5   7    0.91    6.07
  -1   5   7   17.53    6.81
   1  -5  -7   39.40   11.22
   1   5  -7   17.73    8.76
  -1   5   7   24.46   12.21
   1  -5  -7   24.14    8.25
  -1  -5  -7   18.51    8.23
   1   5   7   12.25   11.88
  -1  -5  -7   10.27    8.69
   1  -5   7    7.88    4.28
  -1  -5  -7   15.58   10.13
   1  -5   7   -3.78   10.75
   1   5   7   16.64    4.99
   1  -5   7   15.97    6.48
   2  -2 -12 5420.47  239.02
  -2   2  12 4992.85  212.50
  -2   2  12 5377.66  239.44
   2   2 -12 5652.62  248.39
  -2  -2  12 5451.74  246.42
  -2   2  12 5119.73  218.27
  -2  -2  12 5310.33  232.51
   2   2 -12 4990.11  215.50
  -5   0   8    1.74    3.95
   5   0  -8    4.63    3.57
  -5   0   8  -10.88    8.25
   5   0  -8    5.99    4.71
  -5   0   8    1.93   10.40
  -2  -2 -12  525.97   54.66
   2  -2  12  579.44   53.02
  -2   2 -12  461.43   42.40
   2   2  12  498.02   62.15
  -2  -2 -12  571.45   49.52
  -2   2 -12  624.27   48.96
   2   2  12  534.84   61.32
  -2  -2 -12  528.95   61.27
  -5   0  -8    0.62    5.96
  -5   0  -8    8.67    7.43
   5   0   8   20.20    8.75
   5   0   8    3.56    3.33
  -5   0  -8    1.90    8.46
  -3  -2  11 2591.11  118.71
  -3  -2  11 2642.57  124.69
   3   2 -11 2342.62  106.42
  -3   2  11 2484.02  114.20
   3  -2 -11 2511.24  114.64
   4   4  -5  669.26   48.41
  -4  -4   5  626.93   44.19
   4  -4  -5  638.99   44.03
  -4  -4   5  641.32   53.97
  -4   4   5  702.72   50.67
  -3  -2 -11 1724.27   82.31
  -3  -2 -11 1529.35   55.33
  -3  -2 -11 1648.62   80.81
   3  -2  11 1501.15   97.90
  -3   2 -11 1581.03   75.73
  -3   2 -11 1545.06   46.33
   3   2  11 1435.08   97.48
  -3  -2 -11 1643.60   79.79
  -4  -4  -5  460.73   53.95
   4   4   5  405.30   38.77
  -4  -4  -5  439.39   46.82
   4  -4   5  409.40   38.93
   2  -5  -6    5.23    3.56
   2  -5  -6    4.10   10.97
  -2   5   6   13.17    4.72
  -2  -5   6   11.44   12.64
   2  -5  -6    6.15    2.42
   2   5  -6   13.91    4.15
   2  -5   6  105.23   13.68
   2   5   6   94.36   43.71
   2  -5   6   86.84   21.65
  -2  -5  -6  129.53   20.52
   2   5   6  113.44   19.64
  -2  -5  -6  124.49   25.10
  -2  -5  -6  141.06   48.96
   2  -5   6  110.75   14.52
   2  -3 -11 1892.81   96.35
   2   3 -11 1662.16   73.76
  -2  -3  11 1899.07   90.07
  -2  -3  11 1732.05   82.42
  -2  -3 -11  112.13   29.06
  -2  -3 -11  111.99    9.92
   2   3  11  106.10   24.81
  -2  -3 -11   67.30   17.72
   2  -3  11   75.95   20.53
   2  -3  11   96.90   21.41
  -2  -3 -11  126.38   34.23
  -2   3 -11   88.68   15.73
  -3   0  12    9.03    5.12
   3   0 -12   -0.61    6.03
  -3   0  12    3.85    5.14
   6   1  -3  502.43   51.61
  -6   1   3  542.86   49.53
  -6  -1   3  636.29   45.71
   6  -1  -3  583.50   55.31
  -6  -1   3  597.00   18.46
   6  -1  -3  525.91   46.84
   0  -6   0  345.37   36.72
   0  -6   0  314.22   35.50
  -6   1  -3  111.10   32.00
  -6  -1  -3  117.78   20.94
   6  -1   3  110.11   12.26
  -6  -1  -3  122.24   15.86
   6   1   3   84.76   28.43
   6  -1   3  111.95   25.05
  -3   0 -12    6.43    6.50
  -3   0 -12    3.24    7.54
   3   0  12    5.67    5.41
  -3   0 -12   17.44    7.13
  -4   3   8  687.35   55.64
  -4   3   8  612.00   49.17
  -4  -3   8  537.94   58.50
   4  -3  -8  655.89   46.89
  -4   3   8  568.08   52.31
   4  -3  -8  587.77   49.21
   4   3  -8  679.02   48.99
  -4  -3  -8  986.34   69.19
  -4  -3  -8 1090.64   80.89
  -4   3  -8 1034.52   66.29
   4  -3   8  993.53   65.99
  -4  -3  -8 1072.76   81.11
   4  -3   8  957.50   83.74
   4   3   8 1069.15   87.32
  -1   4  10 1444.19   89.17
   1  -4 -10 1570.65   79.79
  -1  -4  10 1691.46   84.38
   1   4 -10 1358.73   82.51
   1  -4 -10 1415.96   87.66
  -1  -4  10 1629.58   78.63
  -1   4  10 1327.39   89.44
  -1   4 -10 2536.20  110.76
  -1  -4 -10 2947.57  143.64
   1   4  10 2666.85  120.80
  -1  -4 -10 2748.72  132.53
  -1  -4 -10 2634.29  116.49
   1   4  10 2925.44  139.59
   1  -4  10 2681.56  118.15
   1  -4  10 2707.88  143.25
   1  -4  10 2767.74  138.71
  -2   0  13    5.33    3.61
   2   0 -13    2.50    8.32
  -2   0  13   48.56   24.27
   2   0 -13    3.10    5.81
   0  -6  -1   44.68   11.17
   0   6  -1   46.92    9.60
   0  -6   1   24.43    7.17
   0  -6   1   38.15    9.82
   0  -6  -1   40.26   22.81
   2   0  13    7.08    7.10
  -2   0 -13    3.25    6.47
   2   0  13    2.06    3.38
  -6   0   4  346.73   30.40
  -6   0   4  423.54   41.01
   6   0  -4  291.27   36.26
   6   0  -4  338.31   46.60
   6   0   4  787.73   51.17
  -6   0  -4  784.43   50.56
  -6   0  -4  922.64   61.74
   6   0   4  711.91   58.89
   5  -1  -8  117.95   23.47
  -5   1   8  102.30   21.50
   5  -1  -8   76.20   21.09
   5   1  -8  176.19   23.16
  -5  -1   8  153.81   39.44
  -5  -1   8  164.51   29.14
  -5  -1   8  116.37   15.76
  -5   1   8  154.13   19.00
   5   1  -8  108.80   12.19
  -5   1   8  129.69   21.04
  -3  -5   4 1315.69   88.92
  -3  -5   4 1419.62   91.60
  -3   5   4 1453.55   91.02
   3   5  -4 1437.35   89.33
  -3   5   4 1450.91   89.71
   3  -5  -4 1409.24   88.72
   3  -5  -4 1434.27   90.32
   3  -5  -4 1578.73   80.45
   3  -5   4 2848.06  146.27
   3   5   4 2644.97  121.34
   3  -5   4 2250.77   96.22
  -3  -5  -4 2594.40  126.42
   3  -5   4 2559.21  116.83
  -3  -5  -4 2592.44  122.20
  -5  -1  -8    9.53    4.63
   5  -1   8   -3.42    3.67
   5  -1   8   11.14   10.57
  -5   1  -8   11.95    4.37
   5   1   8   11.26    9.74
  -5  -1  -8    3.73    4.47
  -5  -1  -8   13.09    8.94
   5   1   8    5.71    6.33
  -5   1  -8   10.73    5.87
  -5  -1  -8    3.27    7.41
  -5   1  -8   13.79   13.01
   0   2  13    5.14    3.54
   0   2 -13    1.44    3.43
   0  -2 -13    5.02    9.64
   0  -2  13   -0.45   11.35
   0  -2  13    7.60    4.55
   0   2 -13   -0.75    4.28
   0  -2  13    5.02    5.48
  -5   2   7 1092.92   69.18
  -5  -2   7 1218.29   80.58
   5  -2  -7 1040.56   67.50
   5   2  -7 1150.98   76.47
  -5   2   7 1185.55   74.79
   5  -2  -7 1115.76   70.14
  -5  -2   7 1155.20   76.86
   5  -2  -7 1155.13   85.09
  -5   2   7 1198.56   81.92
   3  -3 -10 1258.33   81.86
  -3  -3  10 1160.54   75.46
   3   3 -10 1238.69   78.14
   3   3 -10 1043.91   65.53
  -3  -3  10 1238.00   83.31
  -3   3  10 1182.77   77.66
   5  -2   7  134.48   22.46
   5  -2   7  139.48   29.36
  -5   2  -7  149.85   17.03
  -5  -2  -7  157.24   39.07
  -5   2  -7  171.82   28.55
  -5  -2  -7  181.41   47.03
   5   2   7  175.51   48.73
   5   2   7  142.47   25.32
   3  -3  10  520.77   45.84
  -3  -3 -10  634.59   51.00
   3   3  10  529.54   56.34
  -3  -3 -10  592.09   60.42
   3  -3  10  551.70   51.05
  -3  -3 -10  548.91   51.08
  -3   3 -10  456.75   46.48
  -3  -4   8 1289.14   92.73
   3   4  -8 1217.61   74.47
   3  -4  -8 1171.62   71.45
  -3   4   8 1328.37   84.79
   3  -4  -8 1229.24   75.03
   3  -4  -8 1202.76  101.17
  -3   4  -8 1189.06   81.55
   3   4   8 1253.87   97.26
   3  -4   8 1209.87   82.98
  -3  -4  -8 1329.52   88.67
  -3  -4  -8 1381.15  108.27
  -3  -4  -8 1258.20   84.91
   3  -4   8 1277.04   89.27
   0   3 -12  515.82   44.93
   0  -3  12  530.11   49.82
   0  -3  12  559.57   82.62
   0   3  12  565.70   52.10
   0  -3  12  538.96   68.35
   0  -3 -12  520.57   50.58
   0  -6   2   89.49   21.28
   0   6  -2  124.49   14.02
   0  -6  -2  145.31   37.13
   0  -6   2  185.51   39.94
   0  -6  -2  119.42   24.65
   0  -6  -2  164.31   21.03
   0  -6  -2  104.19   29.54
   5  -3  -5  958.46   67.90
  -5  -3   5  880.14   58.08
   5  -3  -5  950.17   60.69
  -5   3   5  975.79   66.03
   5   3  -5  945.86   65.12
  -5   3   5  962.52   61.77
   5  -3  -5  899.62   59.13
  -5  -3   5 1071.46   82.36
  -1  -6   0  416.72   43.81
   1  -6   0  526.67   74.94
   1  -6   0  468.64   43.48
  -1  -6   0  437.77   42.19
   5   3   5    5.97   12.73
  -5  -3  -5    3.45    6.53
  -5   3  -5    3.48    3.14
   5   3   5    2.41    4.57
   5  -3   5    5.78    4.46
  -5   3  -5    1.59    4.08
  -5  -3  -5    5.02    3.25
   5  -3   5    2.21    3.70
   3   1 -12  376.72   44.07
   3   1 -12  431.54   47.15
  -3  -1  12  428.09   44.55
  -3   1  12  395.85   35.81
  -3  -1  12  371.59   42.86
  -3   1  12  377.59   39.87
   3  -1 -12  393.46   38.02
   3   1 -12  408.42   37.83
  -3  -1 -12  260.09   38.93
  -3  -1 -12  287.35   48.87
   3  -1  12  272.29   57.94
   1  -6  -1    6.42    5.70
   1  -6  -1    0.29    1.82
  -1  -6   1    5.98    7.02
  -1  -6   1   -1.49    4.74
   1  -6   1   14.55    9.64
  -1  -6  -1    3.53    3.93
  -1   6  -1    4.80    3.66
  -1  -6  -1    5.34    7.46
  -2  -1  13   11.07   10.94
  -2   1  13    2.05    4.35
   2   1 -13    1.32   10.09
  -2   1  13   27.21   23.43
  -2  -1  13   10.38   10.66
   2  -1 -13   11.36   10.85
   2   1 -13   12.66    8.65
   2   1  13    0.25    3.28
  -2   1 -13   -7.11    8.39
   2  -1  13    6.43    5.69
  -2  -1 -13    8.57    9.12
   2   1  13    2.95    7.91
   6   2   0  423.75   55.82
  -6  -2   0  481.28   43.06
  -6  -2   0  547.38   68.42
  -6   2   0  556.98   50.51
   6  -2   0  515.62   52.45
   0  -5  -8  409.30   43.70
   0   5  -8  439.82   51.96
   0  -5   8  496.97   46.07
   0  -5  -8  505.42   54.48
   0   5   8  302.52   46.73
   0  -5  -8  472.85   42.62
   0  -5   8  397.94   33.62
   0   5   8  354.54   41.98
   6   1  -4 4788.06  215.14
   6  -1  -4 4833.74  215.54
  -6   1   4 4661.09  203.69
  -6   1   4 4427.73  188.62
  -6  -1   4 4462.56  191.46
  -6  -1   4 4841.79  214.33
   6  -1  -4 4053.72  178.83
   6   1   4 1456.69   90.34
   6  -1   4 1497.06   91.77
  -6  -1  -4 1550.88   69.98
   6   1   4 1624.64   87.25
  -6  -1  -4 1520.38   42.96
  -6   1  -4 1513.58   34.47
   6  -1   4 1658.39   81.56
   1   2 -13 1988.66  112.30
  -1  -2  13 1825.12   88.13
  -1   2  13 1717.69   76.41
   1   2 -13 1800.10   81.10
  -1   2  13 1711.98   74.93
  -1  -2  13 1795.57   93.33
   1  -2 -13 1788.96   88.12
   1   2  13 1185.02   96.76
  -1   2 -13 1059.00   83.81
   1  -2  13 1081.47   72.40
   1   2  13 1036.37   67.36
   1  -2  13 1084.62   77.04
  -1  -2 -13 1010.46   70.52
  -1   2 -13 1054.96   70.00
   6   2  -1   18.16   15.54
   6  -2  -1   37.87   15.40
   6  -2  -1   23.10    8.74
  -6  -2   1   34.20   15.21
   6  -2  -1   41.32   12.51
  -6   2   1   20.24   21.78
  -6  -2   1   45.14   10.03
   6  -2   1  624.53   38.22
   6  -2   1  758.13   53.14
   6   2   1  703.37   52.54
  -6  -2  -1  630.07   44.43
  -6   2  -1  670.17   48.85
  -6  -2  -1  705.80   48.42
   6  -2   1  622.26   38.01
   1  -3 -12 1666.15   83.27
   1   3 -12 1615.15   71.31
  -1   3  12 1536.59   18.42
  -1  -3  12 1783.52   88.66
  -1  -3  12 1624.34   80.84
   1   3  12 1066.58   75.04
   1   3  12  756.13   52.20
  -1  -3 -12  927.98   61.61
  -1  -3 -12  809.03   56.53
  -1   3 -12  837.51   58.36
  -1  -3 -12 1009.39   80.28
   1  -3  12  860.75   58.10
   1  -3  12  776.14   53.64
   1  -3  12  907.34   59.35
   0   0 -14 1797.29   92.07
   0   0  14 1733.24   86.10
   0   0  14 1593.52   78.04
  -1  -6   2 3788.08  168.87
  -1   6   2 3861.53  170.48
  -1  -6   2 4035.50  179.55
   1  -6  -2 3910.53  187.46
   1  -6  -2 3792.25  164.20
   1  -6  -2 3752.54  172.92
   1   6  -2 3871.82  171.16
  -4   4   6   48.72   12.74
  -4   4   6   29.26    7.29
   4  -4  -6   48.89    8.00
   4   4  -6   37.96    9.19
   4  -4  -6   27.00   12.72
  -4  -4   6   47.76   20.62
   4  -4  -6   29.75    6.01
  -1  -6  -2  508.41   51.14
  -1   6  -2  516.08   45.47
  -1  -6  -2  525.54   47.37
   1  -6   2  502.63   45.59
  -1  -6  -2  572.10   57.86
   4   4   6  410.87   41.52
   4  -4   6  502.29   58.04
   4  -4   6  374.47   41.24
  -4  -4  -6  467.08   43.30
  -4  -4  -6  379.14   36.65
   0  -6  -3 2180.73  106.73
   0  -6   3 2231.45  107.81
   0   6  -3 2113.40   96.46
   0  -6   3 1972.71   88.33
   0  -6  -3 2334.28  108.49
   0  -6  -3 2075.35   96.45
   0  -6  -3 1981.16   90.94
   0   6   3 2002.57   94.91
  -4   2  10 1194.44   79.63
   4  -2 -10 1173.21   71.56
   4   2 -10 1084.33   70.06
   4  -2 -10 1264.18   81.42
  -4  -2  10 1398.60   94.13
  -4  -2  10 1158.94   76.48
  -4   2  10 1213.83   87.98
  -4   0  11   17.54   15.24
  -4   0  11   -2.41    3.08
   4   0 -11   10.75    6.99
  -4   0  11    0.86    3.24
   4   0 -11    6.39    6.32
   6  -2  -2 2806.70  126.59
  -6   2   2 3081.75  139.60
   6  -2  -2 2757.75  117.37
  -6  -2   2 3292.77  154.08
   6  -2  -2 3205.90  152.22
   6   2  -2 3007.45  136.71
   6  -2  -2 2855.84  127.88
  -4  -2 -10 2540.49  116.19
   4  -2  10 2600.50  121.88
  -4   2 -10 2720.80  126.00
  -4  -2 -10 2590.78  117.84
  -4  -2 -10 2837.60  133.63
  -4  -2 -10 2848.04  135.88
   4   2  10 2790.67  134.42
   4  -2  10 2864.10  129.79
   6  -2   2   49.30   16.60
  -6  -2  -2   60.78   13.44
   6   2   2   57.38   15.45
   6  -2   2   22.13    3.67
  -6   2  -2   67.59   15.49
  -6  -2  -2   41.63    7.97
  -6   0   5    8.30    4.20
  -6   0   5    5.22    7.07
   6   0  -5    0.16    5.92
   6   0  -5    9.18    9.25
  -4   0 -11    1.56    5.80
   4   0  11    8.83    9.58
  -4   0 -11   22.16   12.11
  -4   0 -11    2.40    5.66
  -6   0  -5   -2.60    4.05
   6   0   5    6.65   11.66
   6   0   5   -0.63    1.70
  -6   0  -5   14.87   11.15
  -2   5   7  406.09   43.30
  -2  -5   7  425.61   39.98
   2  -5  -7  343.94   31.70
   2  -5  -7  368.73   35.90
   2  -5  -7  390.00   35.04
   3  -5  -5  326.56   33.80
  -3   5   5  330.50   33.04
   3  -5  -5  335.14   30.72
   3  -5  -5  314.60   35.08
   3   5  -5  299.53   28.59
  -3  -5   5  325.56   29.94
  -3  -5   5  367.63   62.77
  -3   5   5  313.66   29.26
   2   5   7 3603.59  171.75
  -2  -5  -7 3980.92  179.51
   2  -5   7 3530.33  154.90
   2  -5   7 3292.66  145.39
  -2  -5  -7 3756.19  167.47
  -2  -5  -7 3701.35  174.00
   2  -5   7 3470.43  168.72
   3   5   5  658.87   61.84
   3  -5   5  755.38   51.85
  -3  -5  -5  794.18   65.00
   3  -5   5  661.03   41.52
  -3  -5  -5  785.26   82.58
   3  -5   5  631.01   49.01
  -1   5   8  330.60   53.92
   1  -5  -8  409.04   41.98
   1  -5  -8  379.89   34.15
   1   5  -8  294.14   32.44
  -1  -5   8  374.05   42.27
  -1  -5   8  401.04   51.88
  -1   5   8  339.29   31.97
  -1  -5  -8 1308.62   85.29
   1   5   8 1330.77   92.92
  -1  -5  -8 1111.42   75.89
   1  -5   8 1285.21   81.74
   1   5   8 1156.49   79.15
   1  -5   8 1249.38   85.78
   1  -5   8 1341.55   93.84
  -1  -5  -8 1160.12   78.69
  -1   0  14    4.88    3.19
   1   0 -14  -11.84    8.78
  -1   0  14    8.73    7.58
   1   0 -14   -1.72    5.15
   1   0  14    3.69    9.83
   1   0  14   -0.08    4.99
  -1   0 -14   17.59    6.23
  -5   0   9 1248.76   79.66
   5   0  -9 1148.58   75.08
   5   0  -9 1374.40   88.61
  -5   0   9 1223.34   78.07
  -5   0   9 1410.57   98.49
   1  -6  -3    2.70    6.26
   1   6  -3    9.05    6.15
  -1  -6   3   -2.14    2.91
  -1   6   3   -4.58    5.55
   1  -6  -3    8.48    7.02
   1  -6  -3    8.10    4.36
  -1  -6   3    8.24   13.21
  -1   6  -3  134.22   14.39
  -1  -6  -3   84.91   15.67
   1  -6   3  129.10   41.34
  -1  -6  -3  108.66   27.95
  -1  -6  -3  138.77   16.17
  -1  -6  -3  149.19   29.81
   0  -1  14  258.39   66.06
   0   1  14  310.63   28.25
   0   1 -14  324.50   42.17
   0  -1 -14  332.01   39.28
   0   1  14  335.87   31.62
   0  -1  14  410.51   45.82
   0   1  14  335.43   33.54
   0   1 -14  336.91   43.56
   5   0   9 1833.75   94.56
   5   0   9 1651.20   77.74
  -5   0  -9 1744.66   82.17
  -5   0  -9 1826.31   86.84
  -5   0  -9 1775.00   89.74
  -2  -4  10  255.13   26.07
  -2  -4  10  221.13   49.50
  -2   4  10  220.22   23.25
   2  -4 -10  213.35   29.09
  -2   4 -10    0.79    4.29
   2  -4  10    6.78    5.67
   2  -4  10    0.40    4.89
  -2  -4 -10    7.58    5.36
  -2  -4 -10   16.67    4.85
   2   4  10   13.17    4.15
   2   4  10   10.19    8.55
   2  -4  10    4.40    2.57
  -2  -4 -10   10.70   11.55
  -6  -2   3 1514.50   43.97
   6  -2  -3 1419.74   94.27
   6  -2  -3 1454.62   89.30
   6  -2  -3 1437.04  106.65
   6  -2  -3 1620.56   80.16
   6   2  -3 1582.22   79.24
  -5   3   6  339.10   40.23
  -5   3   6  346.31   35.95
   5  -3  -6  347.67   35.83
   5  -3  -6  343.97   41.59
   5   3  -6  309.26   30.53
  -5   3   6  355.06   33.31
  -5  -3   6  452.38   44.10
   5  -3  -6  319.90   32.48
  -6   2  -3  286.17   35.37
   6  -2   3  200.80   21.91
   6  -2   3  205.41   27.68
  -6  -2  -3  164.91   26.21
  -6  -2  -3  167.26   39.49
   6   2   3  214.45   30.35
   4   1 -11   22.59    6.15
   4   1 -11   14.10   10.63
  -4   1  11   32.52    7.00
  -4  -1  11   37.62   14.20
  -4   1  11   11.19    7.24
   4  -1 -11    2.08    5.56
   4  -1 -11   22.96    4.98
  -4  -1  11   21.73   10.98
  -4   1  11    2.95    5.14
   5  -3   6  418.45   53.64
   5  -3   6  313.40   33.63
   5   3   6  371.67   41.66
  -5   3  -6  356.79   41.74
   5   3   6  431.85   49.74
  -5  -3  -6  382.38   54.14
  -5  -3  -6  376.03   34.84
  -5   3  -6  396.06   45.75
   6  -1  -5   25.47    9.90
  -6  -1   5   35.42   15.17
   6   1  -5   48.79   11.50
  -6  -1   5   34.70    8.80
  -6   1   5   43.84    7.54
   6  -1  -5   30.26    6.31
   6  -1  -5   44.66   14.31
  -6   1   5   44.99   12.38
   0  -6   4   27.75    8.00
   0  -6  -4    1.44    5.02
   0  -6  -4   20.56   16.51
   0   6  -4   13.94    8.29
   0  -6  -4   24.43   10.74
   0  -6   4   18.27    5.66
   0   6   4   16.75    4.07
  -4  -1 -11   50.84   17.10
  -4   1 -11   30.15   17.18
  -4  -1 -11   66.93   14.02
  -4  -1 -11   39.09   15.99
  -4   1 -11   71.63   19.50
  -4   1 -11    9.66   11.28
   4  -1  11   42.86   11.96
   4   1  11   37.69   13.75
   6   1   5   90.67   10.17
   6  -1   5   90.94   14.01
   6   1   5   62.22   28.38
  -6   1  -5  100.88   11.67
  -6   1  -5   91.13   34.34
   6  -1   5   85.67   24.34
  -6  -1  -5  108.53   21.80
  -6  -1  -5   94.01   26.64
  -5   4   0  611.81   46.47
  -5  -4   0  613.91   43.73
   5   4   0  500.09   44.72
  -5  -4   0  658.08   44.33
   5  -4   0  636.81   67.62
   5  -4   0  555.56   54.55
   5  -4   0  548.32   47.64
  -5  -4   0  643.79   56.08
   0  -4 -11  406.77   40.09
   0  -4 -11  366.39   31.29
   0   4  11  329.57   30.25
   0  -4  11  467.99   63.25
   0   4 -11  360.29   32.23
   0  -4 -11  405.96   50.22
   0  -4  11  428.72   46.68
   0  -4  11  358.73   30.91
  -5  -4   1  565.67   55.23
   5  -4  -1  435.64   45.01
   5  -4  -1  446.52   47.28
   5  -4  -1  420.96   40.00
  -5  -4   1  405.29   36.43
   5   4  -1  501.64   60.86
  -5   4   1  529.12   49.65
  -5  -4  -1    9.46    4.55
   5  -4   1    5.70    9.91
  -5  -4  -1   18.65   22.62
   5  -4   1   10.18    3.78
  -5  -4  -1    9.42    4.97
   5   4   1    2.82    5.88
  -4  -3   9  979.27   66.55
  -4   3   9  893.71   58.49
   4  -3  -9  878.32   65.13
  -4  -3   9  881.64   62.36
   4   3  -9  872.15   57.07
  -4   3   9  883.15   68.62
  -4   3   9  893.67   56.50
  -5   2   8   65.88   12.91
   5   2  -8   85.42   17.04
   5  -2  -8   55.79   13.04
  -5  -2   8   99.38   22.90
  -5   2   8   32.87    6.62
   5  -2  -8   49.55    9.47
  -5   2   8   64.61   16.63
  -5  -2   8   44.24   23.58
  -4  -3  -9 2292.31  109.32
   4  -3   9 2092.85   95.24
  -4  -3  -9 2200.25  104.75
  -4  -3  -9 2408.15  117.04
   4  -3   9 1931.34  105.32
   4   3   9 2314.43  107.42
   5  -2   8   98.34   17.40
  -5  -2  -8  127.76   32.13
  -5   2  -8  122.51   17.90
  -5   2  -8  138.90   31.31
  -5  -2  -8  112.64   26.23
  -5  -2  -8  152.13   33.77
   5   2   8  105.99   24.91
   5   2   8  134.02   27.82
   5  -2   8  166.25   31.37
  -1   1  14   -3.80   10.40
   1  -1 -14    8.32    9.20
  -1  -1  14    8.00   11.03
  -1   1  14    5.31    3.91
   1   1 -14    4.08    9.17
  -1  -1  14    8.42   10.10
   1   1 -14   20.23    5.67
  -1   1 -14  112.50   14.40
   1  -1  14  135.69   23.89
   1   1  14  117.60   23.31
  -1   1 -14  123.82   22.99
   1   1  14  129.60   22.63
  -1  -1 -14   70.39   19.46
   1   1  14  206.96   50.09
  -5   1   9  854.34   57.91
  -5   1   9  701.04   51.66
   5  -1  -9  777.40   51.22
   5  -1  -9  769.08   51.25
  -5  -1   9  801.27   55.76
  -5  -1   9  839.90   68.00
  -5  -1   9  937.02   61.03
   5   1  -9  702.97   46.83
   5   1  -9  905.40   61.30
  -5   1   9  844.48   59.67
  -2  -6   0  161.76   40.29
  -2  -6   0  180.06   34.00
   2  -6   0  148.75   42.09
  -5   1  -9 1022.80   69.11
   5   1   9  810.39   54.88
   5  -1   9  863.96   67.00
  -5  -1  -9  955.98   87.41
  -5   1  -9  837.99   57.69
  -5  -1  -9  856.79   58.36
  -5  -1  -9  812.10   56.45
   5  -1   9  784.84   51.53
  -5   1  -9  881.35   62.51
   5   1   9  842.89   63.03
  -5  -1  -9  897.69   73.54
  -4  -5   0   20.11   14.43
  -4  -5   0   16.72    4.54
   4  -5   0   16.12    8.56
   4   5   0   19.04   12.12
  -5  -4   2    4.78    5.38
   5  -4  -2   11.21    5.27
   5  -4  -2    9.05    4.08
  -5  -4   2    9.80    6.51
   5   4  -2   29.74   13.10
   5  -4  -2   21.72   13.50
   5  -4  -2    6.19    5.90
  -5   4   2   26.97    6.84
   3  -4  -9  686.47   54.79
   3   4  -9  709.09   44.09
  -3  -4   9  825.25   57.45
  -3  -4   9  842.58   73.62
   3   4  -9  809.31   51.01
  -3   4   9  736.64   54.26
  -5  -4  -2  924.80   63.73
  -5  -4  -2 1004.08   88.04
   5   4   2 1023.02   71.35
   5  -4   2  964.37   67.31
  -5   4  -2  865.51   55.97
   2  -6  -1 4242.12  190.61
  -2  -6   1 4442.15  198.70
   2  -6  -1 4437.68  203.17
  -2  -6   1 4174.62  184.20
  -2  -6  -1 1246.25   83.48
  -2  -6  -1 1077.50   70.52
   2  -6   1 1111.41   84.43
  -2  -6  -1  984.23   64.70
  -3  -4  -9  107.03   28.39
  -3  -4  -9  112.99   21.79
  -3  -4  -9   91.72   26.92
   3  -4   9  109.02   32.68
   3   4   9  104.24   27.43
  -3   2  12  355.31   76.90
  -3  -2  12  358.53   37.53
  -3  -2  12  336.76   42.02
   3   2 -12  328.02   39.92
   3  -2 -12  364.89   42.17
   3   2 -12  397.94   36.43
   4  -5  -1  200.88   31.97
  -4  -5   1  187.53   25.86
  -4  -5   1  199.01   27.06
   4  -5  -1  222.15   33.24
   4   5  -1  258.67   35.20
   4  -5  -1  238.09   33.88
   4  -5   1   45.17   18.82
   4   5   1   39.22    6.10
  -4  -5  -1   71.92   26.08
  -4  -5  -1   64.35   25.43
  -4  -5  -1   68.39   11.91
   1  -6  -4 2485.78  127.66
   1   6  -4 2158.55  104.50
  -1   6   4 1951.49  111.15
  -1  -6   4 2392.85  111.96
  -1  -6   4 2163.71   95.42
   1  -6  -4 2071.94   95.45
   1  -6  -4 2224.57  101.66
  -1  -6  -4 1805.25   88.16
  -1  -6  -4 1861.83  102.68
  -1   6  -4 1636.28   74.29
   1  -6   4 1546.81   37.53
   1  -6   4 1867.26  108.44
  -1  -6  -4 1727.32   82.46
   3  -2  12  470.89   48.42
  -3   2 -12  525.73   58.51
  -3  -2 -12  487.87   46.85
  -3  -2 -12  438.15   57.25
  -3  -2 -12  444.38   54.45
   3   2  12  473.90   64.56
  -3  -2 -12  511.82   58.19
  -2  -2  13  190.79   51.13
  -2   2  13  182.80   11.64
  -2   2  13  178.36   12.95
  -2   2  13  175.31   11.90
   2   2 -13  144.18   22.54
  -2  -2  13  221.80   29.48
   2   2 -13  239.95   54.55
  -2   2  13   86.34   50.23
   2  -2 -13  230.69   25.91
  -6   0   6  176.56   22.88
  -6   0   6  152.17   27.90
   6   0  -6  143.54   33.04
   6   0  -6  129.75   28.00
   1  -4 -11  164.42   18.59
  -1  -4  11  164.18   43.94
   1   4 -11  131.39   11.67
   1  -4 -11  165.73   18.35
  -1   4  11  136.79   15.90
  -1  -4  11  169.10   45.21
  -4   4   7  564.00   50.39
   4  -4  -7  631.85   48.88
   4  -4  -7  610.84   39.20
   4  -4  -7  563.99   48.03
   4   4  -7  598.05   18.25
  -4   4   7  618.60   53.16
  -4  -4   7  661.45   66.67
   1  -4  11    4.55    2.92
  -1   4 -11    8.81    3.70
  -1  -4 -11    1.09   13.20
   1  -4  11   10.30   11.56
  -1  -4 -11   -0.67    4.60
   1   4  11   -1.12   18.05
  -1  -4 -11   24.05   15.38
   1   4  11   16.50    2.86
   1  -4  11  -10.11   10.39
  -2   2 -13  247.59   43.29
  -2  -2 -13  397.32   38.33
  -2  -2 -13  351.85   31.72
  -2   2 -13  312.70   32.08
   2  -2  13  300.56   34.33
   2   2  13  326.98   62.44
   2   2  13  282.68   34.05
   6   0   6 1825.61   83.12
  -6   0  -6 2103.71  101.64
   6   0   6 1965.77  105.43
  -6   0  -6 1880.93   88.70
  -6   0  -6 1983.56  103.73
   3  -5  -6 1149.73   73.17
  -3   5   6 1220.27   80.25
   3  -5  -6 1037.53   71.87
  -3   5   6 1180.56   79.94
   3  -5  -6 1196.03   77.42
   3   5  -6 1114.02   69.28
  -3  -5   6 1161.15   81.48
  -4  -4  -7 2880.71  152.52
  -4  -4  -7 2750.18  129.43
   4  -4   7 2674.94  126.26
   4  -4   7 2549.72  118.30
  -4  -4  -7 2682.99  127.76
   4   4   7 2785.67  127.70
   3  -5   6   10.45    6.06
  -3  -5  -6   12.09   10.66
   3   5   6   12.46    9.17
  -3  -5  -6   21.89    8.31
   3  -5   6   31.75    6.25
   3  -5   6   15.27    4.77
  -3  -5  -6    8.77   12.13
   3  -5   6    4.23    6.62
  -6  -2   4   21.65    8.80
   6  -2  -4   31.75    6.86
  -6  -2   4   33.44   16.85
   6   2  -4   65.56   18.35
   6  -2  -4   38.93   13.17
  -6  -2   4   18.68    6.99
   6  -2  -4   38.29    9.67
   6  -2  -4   25.53    8.97
   2   3 -12   74.53   10.43
   2  -3 -12   67.70   26.86
  -2  -3  12   85.44   20.99
  -2   3  12   37.11   34.86
  -2  -3  12   85.29   21.78
   6  -2   4  970.62   62.90
  -6  -2  -4 1127.55   74.66
   6  -2   4 1111.83   77.88
  -6   2  -4 1072.49   87.66
  -6  -2  -4 1041.72   68.42
   6   2   4 1021.75   72.38
  -2  -3 -12 2208.16  105.58
   2   3  12 2532.02  128.44
  -2  -3 -12 2268.14  104.15
  -2   3 -12 2074.07   99.51
  -2  -3 -12 2280.22  109.73
   2  -3  12 2291.60  110.95
   2   3  12 2171.58   99.22
  -2  -3 -12 2415.56  119.11
  -2  -6   2   17.03    9.92
   2  -6  -2    8.98   14.30
  -2  -6   2    0.13    4.40
   2  -6  -2   12.66    6.49
  -2  -6  -2   88.08   21.69
  -2  -6  -2  115.73   29.54
   2  -6   2   78.94   19.45
  -2  -6  -2   87.00   15.10
   2   6   2   73.46   12.69
  -4   5   2  217.71   22.81
   4  -5  -2  173.76   29.32
   4   5  -2  193.36   19.19
   4  -5  -2  207.68   34.42
  -4  -5   2  195.49   26.81
   4  -5  -2  192.50   28.12
  -4  -5   2  185.56   16.75
  -3   3  11   15.91    9.72
  -3  -3  11    9.12   14.49
   3   3 -11    3.21    3.57
  -3  -3  11   20.19   14.76
   3  -3 -11   10.94    8.96
  -4  -5  -2    5.26    3.15
   4   5   2    1.93    7.51
   4  -5   2   26.75   13.10
  -4  -5  -2    8.52   10.58
  -4  -5  -2   26.95   14.20
   0  -5   9    4.37    6.13
   0  -5   9    5.51    6.46
   0   5  -9    9.14    7.31
   0  -5  -9    2.23    8.73
   0  -5  -9   -0.96    3.67
   0  -5   9    3.86    2.55
   0  -5  -9   11.72    8.96
   0   5   9   10.85    3.18
   0   5   9    1.71    2.57
   3   3  11  705.68   58.54
  -3  -3 -11  608.63   44.54
   3  -3  11  620.43   50.27
   3  -3  11  772.50   61.51
  -3  -3 -11  679.81   48.71
  -3  -3 -11  695.93   50.29
  -3  -3 -11  721.62   53.32
  -3   3 -11  618.60   47.33
  -3   0  13   10.94   12.20
   3   0 -13    7.00    6.62
  -3   0  13   10.96    4.33
   0   6   5 1454.17  107.90
   0  -6   5 1518.49   75.01
   0  -6  -5 1443.69   93.14
   0  -6   5 1421.90   88.43
   0   6  -5 1445.77   99.81
   0  -6  -5 1505.55   38.45
   0  -6   5 1366.53   84.83
   0  -6  -5 1550.83   74.44
  -5  -4   3 1059.16   85.97
   5  -4  -3  856.83   59.41
  -5   4   3  986.56   66.63
   5  -4  -3  843.79   59.80
   5   4  -3 1085.43   70.26
   5  -4  -3  891.38   58.88
  -5  -4   3  851.84   55.28
  -3   0 -13  440.75   52.15
   3   0  13  457.11   48.62
   5   4   3   10.61    5.68
   5  -4   3    2.53   12.51
  -5  -4  -3   -0.24    7.64
  -5   4  -3    3.93    3.21
  -5  -4  -3    6.44    8.61
   2  -5  -8   10.76   12.66
  -2  -5   8    2.69    6.70
   2  -5  -8   14.93    4.73
   2  -5  -8   19.87    4.40
  -2   5   8   41.22   12.63
   2   5   8  186.22   64.38
  -2  -5  -8  244.83   64.62
   2  -5   8  201.64   27.94
   2  -5   8  207.70   28.80
   2  -5   8  143.15   47.99
  -2  -5  -8  193.72   25.28
  -2  -5  -8  182.65   36.41
  -6  -1   6  194.53   25.07
  -6   1   6  132.84   15.73
  -6   1   6  153.01   23.77
  -6  -1   6  170.71   25.84
   6  -1  -6  148.19   23.33
   6   1  -6  148.25   25.03
   6  -1  -6  134.76   15.77
   6  -1  -6  149.12   13.80
   6   1   6  203.83   51.95
  -6  -1  -6  176.07   50.62
   6   1   6  164.02   27.16
   6  -1   6  122.80   28.69
  -6   1  -6  161.51   34.45
  -6   1  -6  171.81   24.44
  -6  -1  -6  156.40   23.29
   6  -1   6  154.90   19.11
  -6   1  -6  169.14   20.91
  -2   0  14   21.37   10.79
  -2   0  14   12.92   11.28
   2   0 -14   60.43   14.68
  -2   0 -14 3331.82  156.42
   2   0  14 3341.48  156.55
   2   6  -3 1120.05   73.13
   2  -6  -3 1199.53   77.61
   2  -6  -3 1271.91   84.92
  -2  -6   3 1318.99   88.17
  -2  -6   3 1256.71   80.03
  -2  -6  -3 1255.20   83.09
  -2  -6  -3 1199.41   79.65
   2  -6   3 1196.45   82.02
   2   6   3 1073.94   76.09
  -2  -6  -3  942.33   63.03
   2  -6   3 1145.49   83.59
   0  -3  13 2108.60   93.97
   0   3 -13 2001.46   91.50
   0  -3  13 2188.58  103.98
   0   3  13 2038.61   89.85
   0  -3  13 1950.70  103.81
   0  -3 -13 2107.57  104.03
  -1   5   9   17.51    4.91
   1   5  -9   22.89    5.35
  -1  -5   9   11.94    8.23
  -1  -5   9   18.11   12.55
   1  -5  -9   10.50    5.84
  -1   5   9   11.25    2.96
   1  -5  -9    5.57    7.63
   1  -5   9  111.15   20.25
   1  -5   9   86.54   15.23
   1   5   9  118.80   22.40
   1  -5   9  112.56   29.00
  -1  -5  -9   88.32   13.84
  -1  -5  -9   80.51   21.47
   1   5   9   84.95   18.19
  -1  -5  -9   81.56   22.55
   5  -3  -7  368.26   43.07
   5   3  -7  383.88   40.99
  -5   3   7  419.73   45.99
  -5  -3   7  359.40   40.93
   5  -3  -7  381.17   36.54
  -5  -3   7  396.08   42.63
  -5   3   7  369.97   33.22
   5  -3  -7  327.91   31.90
  -5   3   7  424.22   38.26
   4  -5  -3  404.92   37.46
   4  -5  -3  425.51   40.33
  -4  -5   3  314.41   32.57
   4   5  -3  394.19   40.90
   4  -5  -3  356.56   34.33
  -4  -5   3  385.35   58.91
   4   5   3 1504.87   46.35
  -4  -5  -3 1370.17  101.64
  -4  -5  -3 1404.84   93.01
   4  -5   3 1250.20   93.33
   5   3   7 4270.51  200.64
  -5   3  -7 3717.13  173.07
  -5   3  -7 3829.34  168.07
  -5  -3  -7 4248.93  189.72
   5  -3   7 3664.48  162.46
   5  -3   7 3952.32  178.77
  -5  -3  -7 3868.21  177.03
   0   2 -14  791.85   56.44
   0   2  14  868.43   59.26
   0  -2  14  847.66   61.11
   0  -2  14  874.12   59.31
   0  -2 -14  932.90   64.49
   0   2  14  973.90   80.51
   0  -2  14  798.03   54.53
   0   2 -14 1024.00   78.03
  -1  -6   5  719.11   51.24
   1  -6  -5  722.30   48.64
   1  -6  -5  780.12   73.69
   1   6  -5  698.07   60.27
  -1  -6   5  724.02   48.48
  -1   6   5  608.28   62.81
   1  -6  -5  707.30   48.04
   1  -6   5  457.96   43.32
  -1  -6  -5  501.44   56.44
  -1  -6  -5  512.51   53.05
  -1  -6  -5  504.03   54.20
  -1   6  -5  430.66   41.23
   1  -6   5  417.69   53.68
   3  -1 -13 3441.35  154.38
  -3   1  13 3077.48  146.47
   3   1 -13 2993.18  137.89
   3   1 -13 2899.63  129.78
  -3  -1  13 3054.45  136.45
  -3   1  13 2943.77  127.61
  -3  -1  13 3088.23  144.64
  -3  -1 -13 3551.12  161.13
  -3  -1 -13 3853.88  177.36
   3  -1  13 3701.80  165.71
   3   1  13 3834.22  171.94
  -3   1 -13 3813.69  172.03
  -3  -1 -13 3691.33  165.64
  -4  -2  11   21.11   31.40
  -4  -2  11   65.60   25.91
   4   2 -11   46.93    7.94
  -4   2  11   37.50    9.85
   4  -2 -11   62.00   11.07
  -4   2  11   78.18   20.40
  -6  -2   5 2079.95   95.30
   6  -2  -5 1826.40   83.39
   6   2  -5 2191.18  100.50
   6  -2  -5 2196.69  110.01
  -6   2   5 1873.80   82.02
   6  -2  -5 1923.25   84.74
  -6  -2   5 2008.33   89.54
  -4  -2 -11  195.14   31.45
   4  -2  11  225.66   23.78
  -4  -2 -11  152.10   36.15
  -4   2 -11  149.40   41.77
   4   2  11  144.14   54.36
  -4  -2 -11  118.39   20.52
  -4  -2 -11  138.21   18.67
   6  -2   5   65.48   13.83
   6   2   5   44.83    6.19
  -6  -2  -5   65.45   14.33
  -6  -2  -5   64.65   16.38
  -6   2  -5   50.80   13.57
   6   2   5   66.79   22.68
   6  -2   5   47.51   10.22
  -5   4   4 1197.40   76.76
  -5  -4   4 1139.21   73.17
  -5  -4   4 1311.33   85.19
   5  -4  -4 1125.80   72.79
   5   4  -4 1290.88   86.31
   5  -4  -4 1228.16   78.16
   5  -4  -4 1208.28   81.33
  -5  -4  -4   11.12    9.86
  -5   4  -4   14.30    5.24
   5   4   4   11.75   14.38
  -5  -4  -4   15.15   11.01
   5  -4   4   19.32   16.61
   6  -3   0   12.57    3.84
   6  -3   0    8.33    6.91
   6   3   0    3.65    8.79
   6  -3   0    2.44    1.72
  -6  -3   0   18.82   18.76
  -6  -3   0    0.76    5.51
  -6   3   0   18.46   18.96
   5   0 -10    3.69    3.86
  -5   0  10    0.53    2.36
  -5   0  10   12.89   12.01
  -5   0  10    2.33    2.26
   5   0 -10    6.15    7.19
   2   1 -14 5545.85  244.06
   2  -1 -14 5215.82  238.71
  -2  -1  14 5354.07  253.59
  -2   1  14 5935.79  265.11
  -2  -1  14 5629.14  245.93
   2   1 -14 5107.32  222.91
  -2   1  14 5456.97  235.88
   5   0  10    4.80    9.87
  -5   0 -10    0.72   10.67
  -5   0 -10    5.45    4.35
  -5   0 -10   12.04    7.88
   5   0  10   10.39    4.17
  -2   1 -14   79.91   20.30
   2  -1  14  120.06   32.09
  -2  -1 -14  142.29   12.59
   2   1  14   82.76   23.30
  -1  -3  13  303.05   32.56
   1  -3 -13  336.85   42.65
  -1   3  13  274.09   24.80
  -1  -3  13  248.91   69.36
   1   3 -13  280.96   40.72
   1   3  13   16.19   10.42
  -1  -3 -13    4.77    3.50
   1   3  13   11.59    3.96
   1  -3  13   19.51   13.51
   1  -3  13    1.46    6.11
  -1   3 -13   20.94    7.36
   1  -3  13    2.59    6.38
  -1  -3 -13   30.32   23.30
  -4   0  12   10.95   13.16
   4   0 -12   23.89    5.77
  -4   0  12    7.89    4.13
   4   0 -12   24.96   12.82
   6  -3  -1  840.00   63.37
   6  -3  -1  645.88   52.28
  -6  -3   1  714.21   51.36
   6  -3  -1  613.87   43.77
  -6  -3   1  752.17   72.57
   6   3  -1  713.23   70.01
  -6   3   1  749.27   54.27
   6  -3  -1  663.54   43.80
   6  -3   1  355.80   42.35
  -6  -3  -1  316.34   33.65
   6   3   1  361.54   41.39
   6  -3   1  334.58   29.32
   6  -3   1  301.97   30.83
  -6  -3  -1  342.42   31.98
  -6   3  -1  327.80   51.16
  -4   0 -12  796.93   57.49
  -4   0 -12  869.43   70.13
   4   0  12  936.31   74.83
  -4   0 -12  850.07   57.76
   1  -2 -14   14.13   12.79
   1   2 -14   17.74    8.30
  -1  -2  14   -1.40   19.46
  -1   2  14    1.80    1.76
  -1   2  14    1.96    1.98
   1   2 -14   14.89    5.60
  -1  -2  14    6.04    5.92
  -1  -2 -14    8.55    9.44
   1  -2  14    3.02    6.79
  -1   2 -14   -0.18    1.90
   1  -2  14    3.84    3.34
   1   2  14  -10.08   10.55
   1   2  14   -2.65    4.02
  -1   2 -14   -3.71    9.71
  -5   2   9  509.80   59.36
   5  -2  -9  445.84   50.11
  -5   2   9  397.60   46.07
  -5  -2   9  482.25   50.17
  -5   2   9  442.08   40.50
   5   2  -9  416.55   47.35
  -5  -2   9  492.53   43.69
   5  -2  -9  442.17   39.98
  -5  -2   9  436.62   38.75
   6   0  -7    5.75    6.21
  -6   0   7    4.74    4.76
   6   0  -7    6.03    6.05
  -6   0   7   -0.11    3.77
   5   2   9 1223.25   93.88
  -5   2  -9 1211.76   79.36
  -5   2  -9 1279.98   85.43
  -5  -2  -9 1205.41   82.63
  -5  -2  -9 1224.01   94.62
   5  -2   9 1092.75   93.77
  -5   2  -9 1301.88   83.93
   5  -2   9 1211.97   79.16
   3  -5  -7    8.89    5.16
  -3  -5   7   -0.72    7.61
  -3   5   7   13.87    7.38
   3  -5  -7   12.10    2.40
   3  -5  -7   17.02    4.71
  -3   5   7   13.38    7.81
  -6   0  -7   33.38   11.16
   6   0   7    7.43    3.83
  -6   0  -7    4.72    8.68
  -6   0  -7   -0.55    3.42
  -6   0  -7   11.80   11.05
   6   0   7   12.60    7.71
  -3  -5  -7  439.48   43.97
  -3  -5  -7  412.98   45.01
   3  -5   7  403.61   40.57
   3   5   7  322.39   33.38
   3  -5   7  410.51   38.19
  -3  -5  -7  459.11   41.51
   3  -5   7  408.19   55.08
  -2  -6   4   44.98    8.40
   2   6  -4   19.83    5.77
   2  -6  -4   73.30   14.73
  -2  -6   4   70.94   19.73
   2  -6  -4   50.43   32.50
  -2  -6  -4  196.32   31.90
   2   6   4  219.36   39.72
   2  -6   4  194.58   40.77
  -2  -6  -4  199.61   27.73
   2  -6   4  194.75   39.83
  -4  -5   4   41.69    8.44
  -4   5   4   12.26    6.00
   4  -5  -4   37.58   10.80
   4  -5  -4   28.50    7.25
   4  -5  -4   13.14    5.74
  -4  -5   4   26.66   13.94
   4   5  -4   32.23    6.44
  -4  -5  -4   49.08   23.41
  -4  -5  -4   22.14   19.43
   4  -5   4   20.60   17.32
   4  -5   4   23.88    5.65
   4   5   4   51.17   13.33
   0   6  -6  620.96   44.42
   0  -6   6  640.87   67.45
   0   6   6  539.10   49.50
   0  -6   6  587.45   51.12
   0  -6  -6  573.99   57.81
   0  -6  -6  638.26   45.51
   0  -6  -6  523.10   47.59
  -2  -4  11    5.69    8.50
   2  -4 -11   11.55   10.61
  -2  -4  11   13.50    6.51
   2   4 -11   13.05    3.36
   2   4 -11   19.24    2.98
   2  -4  11 1227.90   82.27
  -2  -4 -11 1321.41   92.69
   2  -4  11 1254.36   89.86
  -2   4 -11 1076.28   77.84
   2  -4  11 1104.10   86.40
   2   4  11 1271.06   90.92
   2   4  11 1127.65   74.91
  -2  -4 -11 1362.62   89.93
  -2  -4 -11 1187.92   78.96
  -4  -3  10  235.84   55.21
  -4   3  10  341.49   51.67
  -4   3  10  207.06   21.17
   4  -3 -10  196.39   45.25
  -4  -3  10  217.31   33.82
   4   3 -10  220.19   32.48
   6  -3  -2   80.97   12.44
   6  -3  -2   91.46   20.40
  -6  -3   2   69.26   23.67
   6   3  -2  102.13   26.12
   6  -3  -2  100.74   18.57
  -6   3   2  121.74   25.28
   6  -3  -2   88.45   13.42
  -4  -3 -10   80.72   15.41
   4  -3  10  121.15   14.69
   4  -3  10  104.65   47.10
   4   3  10  110.60   19.31
  -4  -3 -10  136.06   16.57
  -4  -3 -10  118.80   21.36
  -6  -3  -2  108.42   20.68
   6  -3   2  135.51   35.69
   6   3   2   97.47   16.24
  -6   3  -2  215.51   36.21
   6  -3   2   98.31   14.41
  -6  -3  -2  182.61   41.21
  -4   4   8  601.76   55.54
   4  -4  -8  611.64   54.17
  -4  -4   8  773.53   67.64
   4  -4  -8  597.97   53.69
   4  -4  -8  658.57   67.84
   4   4  -8  632.42   56.86
  -4   4   8  590.22   54.66
  -4  -4  -8   65.75   24.98
  -4  -4  -8  143.54   32.08
   4   4   8  118.48   37.00
  -4  -4  -8   59.07   37.03
   4  -4   8   92.25   28.69
   0   0 -15   11.87    6.56
   0   0  15    2.49    5.93
   0   0  15    7.16    6.74
  -5   1  10  340.50   36.55
  -5   1  10  337.16   46.18
  -5  -1  10  455.90   52.87
  -5  -1  10  324.87   36.22
  -5   1  10  295.71   21.13
   5   1 -10  304.89   34.14
  -5  -1  10  328.35   34.51
   5  -1 -10  347.67   43.19
   5  -1 -10  292.91   16.23
  -5   1 -10  449.52   87.71
  -5  -1 -10  391.48   50.70
  -5   1 -10  364.65   37.01
  -5  -1 -10  434.28   46.86
   5  -1  10  418.10   45.61
   5   1  10  443.93   63.35
  -5  -1 -10  508.05   49.46
  -5  -1 -10  521.79   50.62
   5  -1  10  391.52   38.36
  -5   1 -10  447.77   60.98
  -4  -1  12 2603.99  138.28
  -4   1  12 2584.84  130.64
   4  -1 -12 2567.69  134.84
  -4  -1  12 2548.94  130.43
   4   1 -12 2352.30  121.03
  -4   1  12 2575.56  138.79
   4  -1 -12 2522.03  133.13
   4   1 -12 2848.41  148.34
  -4  -1 -12 2618.48  138.41
  -4   1 -12 2518.76  134.35
   4   1  12 2908.69  152.19
   4  -1  12 2589.41  141.71
  -4   1 -12 2616.76  140.87
  -4   1 -12 2737.52  146.27
  -4  -1 -12 2745.79  145.78
  -4  -1 -12 2683.88  144.89
   3   4 -10    0.93    1.22
  -3   4  10    6.32    8.38
   3  -4 -10    9.55   13.55
  -3  -4  10   12.80   14.62
   3   4 -10    3.57    1.57
  -3  -4  10   20.03    7.53
  -3   4 -10    3.99   12.39
  -3  -4 -10   29.23   14.59
   3   4  10   21.28   15.60
  -3  -4 -10   27.54   13.47
  -3  -4 -10   44.46   13.46
   3  -4  10   26.67    8.78
   3  -4  10   27.24   15.36
   6   1  -7  512.01   64.33
   6  -1  -7  603.65   62.98
   6  -1  -7  530.42   52.72
  -6  -1   7  571.98   57.49
   6  -1  -7  541.62   50.58
  -6   1   7  575.68   54.64
  -6   1   7  607.45   54.92
  -6  -1   7  608.19   59.14
   0  -4  12  127.68   19.40
   0   4 -12   84.92   14.15
   0  -4  12  114.63   35.41
   0  -4 -12   98.73   10.96
   0  -4  12  108.07   26.86
   0  -4 -12   97.84   18.19
   0   4  12   94.13   17.88
   0  -4 -12  121.13   17.37
   6  -1   7   88.82   11.69
  -6  -1  -7  124.19   18.50
   6   1   7  151.76   27.49
  -6   1  -7  152.97   32.66
  -6   1  -7  145.89   26.72
  -6  -1  -7  152.07   35.81
  -6   1  -7  133.51   24.57
   6  -1   7  138.85   36.16
   6   1   7  103.16   16.16
   1  -6  -6    6.23    8.58
  -1   6   6    7.77    5.54
  -1  -6   6    0.02    1.09
  -1  -6   6    4.64    2.60
   1  -6  -6    5.02    4.32
   1   6  -6    4.49    4.50
  -1  -6   6   13.01   10.20
  -1  -6  -6  315.22   47.14
   1  -6   6  375.10   65.31
  -1  -6  -6  226.83   26.94
  -1  -6  -6  215.24   19.54
   1  -6   6  320.35   31.75
   5   4  -5  339.82   34.25
   5  -4  -5  272.22   25.71
  -5  -4   5  349.69   70.32
  -5   4   5  295.78   26.20
   5  -4  -5  320.10   49.02
   5  -4  -5  277.87   15.99
  -5  -4   5  286.97   32.00
  -5  -4  -5 1033.70   89.46
   5  -4   5  864.89   78.53
   5   4   5  935.34   86.26
  -5   4  -5  850.20   70.92
   5  -4   5 1013.80   91.17
  -5  -4  -5  824.38   77.43
   6  -3  -3  978.36   84.83
  -6  -3   3 1134.22  101.48
   6   3  -3 1142.71  100.59
   6  -3  -3  989.79   82.70
  -6  -3   3  941.01   80.49
   6  -3  -3 1033.95   84.62
  -6   3   3 1158.34  100.24
   6  -3  -3  923.85   88.88
  -6  -3  -3  823.66   80.85
  -6  -3  -3  810.83   68.31
   6  -3   3  723.09   61.27
  -6   3  -3  828.56   72.47
   6  -3   3  771.90   68.20
   6   3   3  774.94   73.77
   1   0 -15  151.68   51.53
  -1   0  15   59.96   18.89
  -1   0  15   73.93   51.24
   6  -2  -6 1011.50   85.01
   6   2  -6 1251.12   44.95
   6  -2  -6 1433.64   81.46
  -6  -2   6 1150.97   95.38
   6  -2  -6 1206.17   20.00
  -6   2   6 1180.98   96.32
  -6   2   6 1160.73  102.25
  -6  -2   6 1294.67   75.28
   1   0  15  498.57   52.77
  -1   0 -15  534.55   50.72
   1   0  15  548.74   60.73
   6   2   6  875.80   75.40
   6   2   6 1096.48   94.09
   6  -2   6 1002.67  101.01
  -6   2  -6 1030.21   89.76
   6  -2   6  933.16   77.36
  -6  -2  -6 1015.00   87.86
  -6   2  -6 1038.38   89.36
  -6  -2  -6 1146.61   96.52
   0  -5  10   49.82   13.89
   0  -5  10   27.67   25.87
   0  -5  10   12.08    4.20
   0  -5 -10   51.87   14.52
   0   5  10   49.51    9.76
   0  -5 -10   52.61   15.54
   0  -1  15 1169.92   99.44
   0   1 -15 1255.91   53.00
   0  -1  15 1050.97   90.97
   0   1  15 1080.01   92.56
   0  -1 -15 1083.94   92.04
   0   1  15  969.53   81.19
   0   1  15 1174.10  100.10
  -2   5   9  811.41   76.08
  -2  -5   9  920.86   85.88
  -2  -5   9  935.50   80.18
   2  -5  -9  833.30   69.00
   2  -5  -9  886.27   81.07
  -2  -5  -9 1901.53  102.65
  -2  -5  -9 1686.75   92.73
   2  -5   9 1689.56   90.98
  -2  -5  -9 1857.01  104.48
   2  -5   9 1759.59   93.02
   2   5   9 1826.47  108.62
   2  -5   9 1818.18  102.62
  -3  -6   0 1413.54   84.21
   3   6   0 1351.33   73.31
  -3  -6   0 1315.56   70.62
   3  -6   0 1181.69   99.89
  -5   3   8  859.95   82.63
   5   3  -8  976.00   83.04
   5  -3  -8  865.59   72.89
   5  -3  -8  774.35   64.82
  -5   3   8  865.88   75.22
  -5  -3   8  979.46   84.35
  -5   3   8  942.22   79.49
  -5  -3  -8  456.35   46.29
   5  -3   8  361.59   52.57
  -5  -3  -8  522.29   55.10
  -5   3  -8  480.89   47.09
  -5  -3  -8  470.94   66.49
   5   3   8  483.79   59.46
   2  -6  -5  138.65   19.94
   2  -6  -5  120.69   14.62
  -2  -6   5  111.40    6.54
  -2  -6   5  112.02   32.57
   3   6  -1   65.49   20.01
  -3  -6   1   64.76   10.93
   3  -6  -1   85.18   23.46
   3  -6  -1   79.86   19.55
  -3  -6   1  109.00   31.07
   3  -6  -1   68.93   14.11
  -2  -6  -5  803.85   69.77
  -2  -6  -5  968.64   84.49
  -2  -6  -5  889.39   87.29
   2  -6   5  785.23   70.93
   2   6   5  832.70   73.22
   2  -6   5  910.96   82.85
   3  -6   1   -0.69    7.38
  -3  -6  -1    2.50   11.79
  -3  -6  -1    4.20    2.03
  -3  -6  -1   13.38    6.25
   3   6   1   -0.62    7.42
  -4   5   5  350.27   37.82
   4  -5  -5  322.09   36.34
  -4  -5   5  398.65   53.65
   4  -5  -5  341.10   41.52
   4   5  -5  355.37   36.53
  -4  -5   5  362.51   37.75
  -1   4  12   49.90    9.19
  -1  -4  12  103.61   21.65
  -1  -4  12   47.90   38.72
   1   4 -12   77.70   10.16
   1  -4 -12   64.68   19.24
  -4  -5  -5 1312.42   82.98
   4   5   5 1310.53   80.04
  -4  -5  -5 1406.72   79.08
   4  -5   5 1192.37   96.93
   4  -5   5 1315.34   89.26
   1   4  12 1334.24   74.88
  -1   4 -12 1158.93   98.85
   1  -4  12 1274.99   71.11
  -1  -4 -12 1149.55   97.01
  -1  -4 -12 1205.54   36.41
  -1  -4 -12 1238.38   26.07
  -1  -4 -12  993.33   96.99
   1  -4  12 1238.12   38.86
   1  -4  12 1221.64   38.84
   1   4  12 1089.68   93.98
  -3  -2  13  962.07   81.32
   3  -2 -13  895.06   77.99
  -3  -2  13  947.91   93.18
   3   2 -13  981.21   92.50
   3   2 -13  780.06   65.76
  -3   2  13 1116.34   95.98
   3   2  13  124.55   16.55
  -3  -2 -13  168.80   26.02
  -3  -2 -13  164.32   50.75
  -3  -2 -13  115.43   34.94
  -3   2 -13  162.11   44.71
  -3  -3  12 1367.56   78.46
   3  -3 -12 1480.86   84.53
  -3  -3  12 1463.66   82.29
   3   3 -12 1292.31   67.42
  -3   3  12 1505.23   84.24
  -3  -3 -12   34.30    9.91
  -3  -3 -12   40.20   19.29
   3   3  12   26.41   23.95
  -3  -3 -12   52.99   11.76
   3  -3  12   42.65   10.20
  -3  -3 -12   41.01   14.52
   3  -6  -2 1143.35   98.91
   3  -6  -2 1295.69   77.10
  -3  -6   2 1262.76   73.38
   3  -6  -2 1287.96   74.05
  -3  -6   2 1254.62   29.57
   3   6  -2 1331.51   71.80
  -3  -6  -2 1019.22   90.56
  -3  -6  -2  925.41   85.23
  -3  -6  -2  871.67   76.28
   3  -6   2  926.33   89.27
   3  -6   2 1014.58   88.43
   3   6   2  940.06   81.48
   1  -5 -10 1677.03   86.73
  -1   5  10 1586.75   81.30
   1  -5 -10 1835.18  101.54
  -1  -5  10 1757.00  101.85
  -1  -5  10 1907.21  104.86
  -1  -5 -10   47.17   10.76
   1  -5  10   57.96   11.61
   1  -5  10   41.90    6.85
  -1  -5 -10   51.41   14.34
   1  -5  10   36.43   16.33
   1   5  10   26.94    9.68
   1   5  10   32.50    8.55
  -1  -5 -10   40.40   10.97
   1   1 -15 3107.93  161.62
   1   1 -15 2832.96  149.64
   1  -1 -15 3101.18  164.37
  -1   1  15 3258.48  171.14
  -1  -1  15 3005.10  176.02
  -1   1  15 3057.22  156.71
  -1  -1  15 2994.06  161.93
  -1   1  15 3078.49  155.57
   2   3 -13  904.21   75.93
  -2  -3  13  937.12   83.22
  -2  -3  13  873.53   84.07
  -2   3  13  863.61   75.65
   2  -3 -13  906.48   80.98
   1   1  15  944.28   83.23
  -1  -1 -15  951.20   91.99
   1   1  15  829.07   77.30
   1  -1  15  826.19   72.63
   1   1  15  996.52   99.78
  -1   1 -15 1027.45   98.61
   2  -3  13  476.87   60.95
   2   3  13  421.27   49.75
  -2   3 -13  352.08   40.03
  -2  -3 -13  407.32   57.30
   2   3  13  342.90   40.99
  -2  -3 -13  313.95   43.41
  -2  -3 -13  358.60   35.27
  -2  -3 -13  448.10   53.48
  -7   0   0    7.19    8.03
   7   0   0    1.60    5.15
  -6   3   4  974.23   86.36
   6  -3  -4  927.12   88.38
  -6  -3   4  876.56   74.17
   6  -3  -4  940.71   81.12
   6  -3  -4 1033.78   90.09
   6  -3  -4  943.09   78.89
   6   3  -4  960.05   83.31
  -6  -3   4 1127.47   95.56
  -2   2  14  126.30   14.29
   2  -2 -14   91.50   23.89
   2   2 -14   96.29   18.33
  -2  -2  14   87.69   28.04
  -2   2  14   78.57   10.47
  -2  -2  14  119.27   24.34
  -2   2  14  119.86   45.43
  -2   2  14   98.70   10.25
   2   2 -14  112.50   20.21
   6  -3   4  266.49   61.36
   6   3   4  271.96   35.18
   6  -3   4  218.79   18.73
  -6  -3  -4  273.23   14.10
  -6   3  -4  293.42   38.48
  -6  -3  -4  276.31   29.50
  -6   3  -4  287.49   43.99
   2  -2  14 1302.28   84.36
   2   2  14 1165.97  104.92
  -2  -2 -14 1143.97   97.79
  -2   2 -14 1218.43   64.37
  -2  -2 -14 1155.91   96.84
   0  -6   7    0.75    2.16
   0   6   7   12.30    6.21
   0  -6  -7    2.55    9.51
   0  -6  -7    8.35    4.81
   0   6  -7    6.54    6.98
   0  -6  -7    5.97    8.26
   0  -6   7    7.27    8.00
  -7   0   1 3907.06  208.24
   7   0  -1 3950.83  206.14
  -7   0  -1 1297.34   71.70
   7   0   1 1297.18   75.06
   6   0  -8 1251.34   25.18
  -6   0   8 1431.20   79.99
   6   0  -8 1531.11   86.58
  -6   0   8 1487.15   84.19
  -3   5   8  761.09   65.39
   3  -5  -8  687.59   62.82
  -3  -5   8  785.24   68.66
  -3   5   8  663.84   71.73
   3  -5  -8  773.46   67.35
  -6   0  -8 1165.51   99.34
   6   0   8 1030.95   87.29
  -6   0  -8 1128.10  111.79
   6   0   8 1115.14  106.63
  -6   0  -8 1254.89   41.32
   3  -5   8  999.68   87.88
   3   5   8  973.38   97.10
  -3  -5  -8  912.10   84.27
  -3  -5  -8  959.87   86.03
   3  -5   8  905.44   79.38
  -3  -5  -8 1024.39   88.97
   3  -5   8  877.97   87.37
  -3   0  14    9.91    7.30
   3   0 -14    4.84    7.18
   5  -4  -6  961.87   86.05
  -5   4   6 1043.46   86.86
  -5   4   6 1065.20   89.53
   5   4  -6  991.51   89.49
  -5  -4   6 1032.42   89.54
   5  -4  -6  921.41   80.12
   5  -4  -6 1160.04  109.86
  -3   0 -14    3.21    7.63
   3   0  14    3.68    7.14
  -3   6   3  187.40   10.99
  -3  -6   3  231.42   18.66
  -3  -6   3  256.14   59.84
   3  -6  -3  202.98   36.75
   3  -6  -3  196.78   30.61
   3  -6  -3  227.53   46.91
   3   6  -3  227.94   18.34
  -5  -4  -6  811.64   70.55
  -5  -4  -6  827.35   71.27
   5   4   6  906.21   81.93
   5  -4   6  680.69   74.54
   5  -4   6  817.93   85.84
  -5   4  -6  754.16   63.74
  -7   0   2    9.67    7.00
   7   0  -2   14.81   13.95
   3  -6   3   17.18   10.44
   3   6   3    5.11    5.28
   3  -6   3    4.50    4.05
  -3  -6  -3   18.56   17.55
  -3  -6  -3    6.07    7.82
  -7   0  -2   11.01    5.95
   7   0   2   13.84    6.01
  -7   1   0  289.69   46.46
  -7  -1   0  196.65   40.67
   7   1   0  221.32   33.22
  -7  -1   0  201.27   12.50
  -5   2  10  197.72   29.39
   5   2 -10  204.10   19.79
   5  -2 -10  178.62   10.82
  -5  -2  10  195.92   39.22
  -5   2  10  182.19    8.40
   5  -2 -10  193.09   22.36
  -5   2  10  160.40   29.48
  -5  -2  10  293.15   59.43
  -5   0  11    1.48    2.50
   5   0 -11   -0.57    3.34
  -5   0  11   12.30   10.72
   5   0 -11    6.89    4.41
  -5   0  11    5.56    5.58
   4  -4  -9   79.83   24.18
  -4   4   9   89.44   22.89
   4   4  -9  105.33   11.00
  -4  -4   9   98.73   43.89
   1  -6  -7  451.25   50.27
  -1  -6   7  569.58   68.23
  -1   6   7  482.65   56.56
   1   6  -7  550.90   70.59
   1  -6  -7  442.75   47.65
  -1  -6  -7  100.49   13.72
  -1  -6  -7  113.21   17.92
   1  -6   7  127.34   10.08
   1  -6   7  131.10   32.33
   1  -6   7  149.28   19.37
  -1  -6  -7   96.13   23.48
  -5  -2 -10  118.15   19.57
  -5  -2 -10  113.73   25.27
   5  -2  10  125.41   38.58
  -5   2 -10  121.91   35.12
   5   2  10  142.10   38.38
  -5   2 -10  137.43   27.94
  -5   2 -10  119.63   17.53
   5  -2  10   87.37   15.37
  -5  -2 -10  146.63   30.46
  -5  -2 -10   72.43   15.71
   4  -4   9  537.26   66.52
  -4  -4  -9  619.90   59.18
   4  -4   9  636.87   61.48
   4   4   9  692.18   68.18
  -4  -4  -9  717.83   66.38
  -4  -4  -9  674.74   64.42
   5   0  11 3471.41  181.34
  -5   0 -11 3362.13  177.26
  -5   0 -11 3457.68  177.73
  -5   0 -11 3271.20  185.31
  -4   2  12  198.83   61.76
  -4  -2  12  147.22   41.25
  -4  -2  12  233.90   29.04
   4  -2 -12  149.97   29.83
  -7  -1   1  105.60   11.95
  -7  -1   1  105.58   11.68
   7   1  -1  107.00   32.24
  -7  -1   1  116.57   26.57
  -7   1   1  142.79   23.48
   7  -1  -1  127.64   48.41
   7  -1   1  912.96   94.29
  -7  -1  -1  854.70   70.84
  -7  -1  -1  883.83   87.42
   7   1   1  904.15   80.34
  -7   1  -1  845.19   73.70
  -4   2 -12  772.24   81.74
   4  -2  12  712.68   68.57
  -4  -2 -12  808.72   73.83
  -4  -2 -12  705.73   25.49
   4   2  12  784.87   70.52
  -4  -2 -12  764.31   66.34
  -4  -2 -12  680.20   69.97
  -6   1   8  117.31   16.32
   6  -1  -8  130.76   21.19
  -6  -1   8  140.09   23.02
   6  -1  -8  135.01   27.22
   6   1  -8  185.73   43.74
   6  -1  -8   98.77   14.35
  -6   1   8  134.62   20.86
  -6  -1   8  136.12   24.09
   2  -6  -6  417.33   53.37
  -2  -6   6  513.10   57.25
   2  -6  -6  434.89   50.16
   6  -1   8 1340.54   73.52
  -6   1  -8 1398.07   75.64
  -6  -1  -8 1519.78   80.80
   6   1   8 1319.68   70.19
   6   1   8 1550.53  102.64
  -6  -1  -8 1406.72  102.26
  -6  -1  -8 1485.74   83.42
  -6  -1  -8 1388.77   97.22
  -6   1  -8 1541.71   86.12
   6  -1   8 1581.77   94.63
  -6   1  -8 1410.96   99.21
   2  -6   6  645.89   64.31
  -2  -6  -6  505.02   51.65
   2   6   6  453.46   51.07
   2  -6   6  460.17   45.78
  -2  -6  -6  562.50   54.11
  -2  -6  -6  494.47   50.03
  -6   2   7  108.53   12.26
  -6  -2   7   97.77   18.51
  -6  -2   7  117.69   36.56
  -6   2   7   91.27   18.13
   6   2  -7   92.90   21.65
   6  -2  -7   90.78   13.16
   6  -2  -7  118.23   18.89
   0  -3  14  622.15   59.05
   0   3  14  601.63   57.37
   0  -3  14  658.82   65.45
   0  -3 -14  684.43   75.23
   0  -3  14  607.69   73.56
   0   3 -14  544.56   54.83
  -4  -5   6   13.55   21.35
   4  -5  -6   32.89    7.68
   4   5  -6   37.71    7.77
  -4  -5   6   13.84    3.86
   4  -5  -6   28.19    8.87
  -4   5   6   45.08    7.85
   6  -2   7  251.75   28.99
  -6   2  -7  313.87   67.52
   6   2   7  248.06   53.69
  -6  -2  -7  359.26   52.14
  -6   2  -7  271.96   40.53
  -6  -2  -7  293.35   36.37
   6  -2   7  239.86   61.72
   6   2   7  221.72   34.85
   4  -5   6   -2.56    2.53
  -4  -5  -6   19.64    9.71
  -4  -5  -6    2.79    8.12
   4  -5   6    7.30    3.31
   4   5   6    9.61   11.33
   2   0 -15   -3.68    9.29
  -2   0  15    6.88    6.24
  -2   0  15    7.07    7.00
  -3  -1  14   14.13    6.28
  -3  -1  14    4.22    8.31
  -3   1  14    4.01    3.19
  -3   1  14   -2.46   15.11
   3  -1 -14    8.90    7.25
   3   1 -14   11.85    6.14
   3   1 -14   -1.58   25.89
   2   0  15   -2.57    9.53
  -7   0   3   54.71   16.13
   7   0  -3   80.79   25.67
  -4   3  11  643.46   59.88
   4  -3 -11  712.20   69.22
  -4   3  11  751.02   68.88
  -4  -3  11  708.84   64.57
   4   3 -11  756.11   63.48
  -4  -3  11  757.28   92.56
  -3   1 -14   -2.15   13.06
  -3  -1 -14   18.14    9.53
  -3  -1 -14   58.85   21.32
  -3  -1 -14    5.63   10.19
   3  -1  14   25.22    8.45
   3   1  14   34.50    9.93
  -7   0  -3   32.27   10.12
   7   0   3    6.40   11.81
  -7   0  -3    5.16    2.36
  -7  -1   2  140.39   13.98
   7  -1  -2  172.98   44.99
  -7  -1   2  154.05   17.94
   7   1  -2  161.30   17.30
  -7  -1   2  122.19   27.87
  -7   1   2  165.60   34.35
  -6  -3   5    2.08   10.27
   6  -3  -5    7.21    3.94
   6   3  -5    4.98    6.84
  -6  -3   5   11.90    3.50
   6  -3  -5    8.63    3.40
   6  -3  -5   17.26    5.24
   6  -3  -5    9.85    4.54
  -6   3   5    6.14    4.04
   7   1   2  107.50   29.10
  -7   1  -2  148.90   35.04
  -7  -1  -2  111.46   29.47
  -7   1  -2  105.86   20.03
   7  -1   2  139.72   33.35
  -7  -1  -2  130.50    9.59
   4   3  11 1002.36   98.16
   4  -3  11 1121.11  102.84
  -4  -3 -11 1080.21   93.02
  -4  -3 -11 1115.61   97.51
  -4  -3 -11 1080.03   96.87
  -6   3  -5  875.37   74.74
   6  -3   5  811.31   74.51
  -6   3  -5  862.78   75.19
  -6  -3  -5  953.53   83.58
   6   3   5  884.34   78.30
   6  -3   5  770.62   66.31
  -6  -3  -5  852.35   72.22
  -4   0  13   15.89    9.68
   4   0 -13    1.33    4.51
  -4   0  13    5.59    5.33
   4   0 -13    4.42    5.97
   0   2  15  700.68   35.44
   0  -2  15  655.15   66.06
   0  -2  15  657.66   62.60
   0   2 -15  597.29   56.57
   0   2 -15  843.76   82.07
   0  -2 -15  695.46   70.83
   0  -2  15  645.95   60.85
   0   2  15  597.58   57.57
   4   0  13   14.89    9.59
  -4   0 -13    4.85    9.53
  -4   0 -13    3.40    4.48
  -4   0 -13   11.37    4.63
   5   1 -11 1714.30   89.66
  -5   1  11 2062.32  111.14
  -5  -1  11 2050.22  127.62
   5  -1 -11 1892.58   96.60
   5  -1 -11 1854.03  102.56
  -5   1  11 1697.64   91.07
  -5   1  11 1948.57  102.13
  -5  -1  11 2018.35  106.81
   2   4 -12 1048.69   84.75
   2  -4 -12 1046.72   93.97
  -2  -4  12 1025.62   87.73
  -2  -4  12 1029.89   95.57
  -3   6   4   90.86   16.29
  -3  -6   4   80.58    9.78
   3  -6  -4   72.50   16.15
   3  -6  -4   76.43   18.07
  -3  -6   4   95.53   24.01
   3  -6  -4   62.49    8.06
   2   4  12   26.85    5.67
  -2  -4 -12   25.37    7.17
  -2  -4 -12   27.96    8.14
  -2  -4 -12   25.72   13.37
  -2  -4 -12   25.88   15.54
   2   4  12   12.23   11.26
   2  -4  12   27.36    8.15
   2  -4  12    7.66   10.33
  -2   4 -12   16.75    6.07
   3  -6   4 1709.39  105.66
  -3  -6  -4 1648.44   93.99
   3  -6   4 1631.01   92.82
   3   6   4 1772.27  102.56
  -3  -6  -4 1688.24  113.83
  -5   1 -11  183.21   37.78
  -5  -1 -11  191.05   27.76
  -5  -1 -11  174.88   46.07
   5  -1  11  145.72   37.45
  -5   1 -11  207.48   39.34
  -5  -1 -11  186.68   45.01
  -5   1 -11  158.45   36.13
   5   1  11  166.16   22.78
   3   4 -11  847.60   68.83
   3  -4 -11  986.61   98.93
  -3  -4  11  884.90   84.06
   3   4 -11  847.13   69.60
  -3  -4  11 1036.96   89.00
  -3   4  11  831.72   73.94
  -1   3  14  504.56   46.30
   1   3 -14  445.57   44.86
  -1  -3  14  484.61   54.32
  -1  -3  14  546.63   68.59
   1  -3 -14  471.59   64.32
   3  -4  11  281.51   32.17
  -3  -4 -11  437.54   43.10
  -3  -4 -11  433.18   43.98
  -3   4 -11  299.11   45.18
   3  -4  11  373.22   35.71
   3   4  11  382.78   45.55
  -3  -4 -11  421.01   45.13
  -1  -3 -14  786.10   75.40
  -1   3 -14  906.43   78.03
   1   3  14  724.43   64.11
   1  -3  14  927.73   80.41
   1   3  14  769.46   90.46
   1  -3  14  781.93   70.26
   1  -3  14  907.33   87.62
  -1   3 -14  794.86   80.56
   5   3  -9    9.67    6.40
   5  -3  -9    2.64    1.27
   5  -3  -9    1.76    8.45
  -5   3   9    4.34    4.00
  -5   3   9   15.42    9.16
  -5   3   9   24.91   10.00
  -5  -3   9    2.27    7.27
   5  -3   9 1008.91   88.97
  -5   3  -9 1100.40   93.74
  -5  -3  -9 1045.64   97.46
   5  -3   9 1189.06  111.02
   5   3   9 1236.61   52.95
  -5  -3  -9 1251.36   45.69
  -5  -3  -9 1254.48   51.03
   2  -5 -10  217.20   11.88
  -2  -5  10  312.39   37.06
  -2   5  10  236.34   24.35
   2  -5 -10  258.93   48.07
  -2  -5  10  195.41   43.08
   2   1 -15  110.28   46.27
  -2   1  15  134.19   37.12
   2   1 -15  111.28   22.36
  -2   1  15  101.07   42.35
  -2  -1  15  181.98   50.54
   2  -1 -15  148.11   45.46
  -2  -1  15  128.71   31.73
  -2   5 -10   45.11    8.76
   2   5  10   27.63    8.13
  -2  -5 -10   15.49    7.88
  -2  -5 -10   30.03   11.68
  -2  -5 -10   54.33   13.19
   2  -5  10   38.98   12.76
   2  -5  10   36.55    8.43
   2  -5  10   29.82    7.85
   2   1  15  369.74   46.64
   2  -1  15  373.68   67.86
  -2   1 -15  369.27   41.93
  -2  -1 -15  390.96   40.80
   7  -1  -3 4336.53   63.14
  -7  -1   3 3780.41  188.28
  -7  -1   3 4136.39   59.18
   7   1  -3 4200.98   57.28
  -7   1   3 3768.36  193.20
   7   1   3 1760.38   95.15
  -7  -1  -3 1567.19   82.09
  -7   1  -3 1761.81   97.02
  -7  -1  -3 1614.99   89.19
  -7   1  -3 1415.59   78.43
   7  -1   3 1772.19  119.36
  -5  -5   0  627.33   59.91
  -5  -5   0  673.35   64.17
   5   5   0  586.48   58.17
  -5  -5   0  524.48   49.46
   5  -5   0  539.17   66.31
   5  -5   0  449.99   41.22
   5  -5   0  586.54   55.30
  -1   2  15   46.22    8.93
  -1  -2  15   83.14   23.00
   1  -2 -15   56.61   20.72
   1   2 -15   72.27   24.21
   1   2 -15   36.55    7.97
  -1   2  15   44.05    7.06
  -1  -2  15   26.83   20.16
   1   2  15  156.83   24.80
  -1   2 -15  206.37   30.30
   1   2  15  275.09   21.30
   1  -2  15  281.95   39.70
  -1  -2 -15  239.67   41.70
  -1   2 -15  169.00   42.78
   1  -2  15  236.29   19.21
  -4  -1  13   85.08   29.02
   4   1 -13   51.58   11.49
  -4   1  13   64.97   13.08
   4  -1 -13   78.60   18.95
   4   1 -13  109.82   22.76
  -4  -1  13   56.78   18.52
  -4   1  13  115.81   40.56
   0  -5  11 2248.43  118.34
   0  -5 -11 2266.09  115.62
   0  -5  11 2026.00  102.15
   0   5  11 2158.70  111.07
   0  -5 -11 2393.82  135.23
   0  -5  11 2306.86  124.68
   5   5  -1   23.07    7.02
   5  -5  -1   37.89   10.94
   5  -5  -1   53.47   19.53
  -5  -5   1   35.05   13.24
  -5  -5   1   29.26    8.09
   0  -6   8  207.21   20.34
   0  -6  -8  210.18   38.92
   0   6  -8  125.50   21.83
   0  -6  -8  155.17   35.71
   0  -6   8  197.87   51.43
   0  -6  -8  193.14   27.57
   0  -6   8  159.32   13.25
   0   6   8  145.46   17.51
   5   5   1    2.26    7.05
  -5  -5  -1   17.02    6.24
  -5   5  -1    3.03    1.98
   5  -5   1   26.20   23.52
   5  -5   1    0.77    1.12
  -5  -5  -1    2.82    7.55
  -4   1 -13   43.33   21.75
  -4  -1 -13  109.57   28.03
   4   1  13  117.31   26.63
  -4   1 -13  100.66   30.42
   4  -1  13   81.41   22.82
  -4  -1 -13   56.85   13.55
  -4  -1 -13   88.84   50.61
   7   0  -4    9.30   11.45
  -7   0   4    4.13    4.12
  -7   0   4    0.09    0.94
  -7   0  -4   14.30    8.66
   7   0   4    7.31    3.27
  -7   0  -4    3.61    2.87
   7   0   4   13.13    8.95
   0   4  13   26.57    6.90
   0   4 -13   32.13    6.11
   0  -4  13   17.27   11.58
   0  -4  13   23.82    7.31
   0  -4 -13   27.29    6.48
   0  -4  13   24.04    9.31
   0  -4 -13   13.22   13.73
   5  -4  -7  416.15   39.03
   5  -4  -7  426.58   50.97
  -5   4   7  386.34   37.64
  -5   4   7  387.38   43.13
  -5  -4   7  428.97   45.03
  -5   4   7  447.18   44.65
   5   4  -7  440.23   40.78
  -5  -4  -7  161.49   45.75
   5  -4   7  232.94   50.94
  -5  -4  -7  219.09   15.90
  -5   4  -7  199.02   28.72
   5   4   7  134.76   44.30
   5  -4   7  135.47   27.85
   6   0  -9    6.89    5.87
  -6   0   9   -3.75    5.16
   6   0  -9    2.07   11.39
  -6   0   9   20.86    7.34
   6   0  -9    2.14    3.80
   5   5  -2 1091.04   93.56
  -5  -5   2 1116.83  109.35
  -5  -5   2  975.11   83.66
   5  -5  -2 1127.36   97.97
   5  -5  -2 1066.82   89.07
   3  -5  -9   62.99    8.03
  -3  -5   9   44.48   36.68
  -3   5   9   75.87   29.94
   3  -5  -9   76.10   20.81
  -3   5   9   68.24   10.26
  -6   0  -9    6.86    3.83
   6   0   9   -0.66    6.59
  -6   0  -9    8.01   13.75
  -6   0  -9    5.06    6.52
  -5  -5  -2  457.86   58.38
  -5   5  -2  318.07   31.54
  -5  -5  -2  468.32   46.78
   5  -5   2  341.47   33.39
   5  -5   2  360.12   51.91
   5   5   2  407.91   51.98
  -3  -5  -9    2.68    5.55
   3  -5   9    4.84    3.99
  -3   5  -9   16.91    5.33
   3  -5   9    6.86    3.96
   3  -5   9    4.50    2.93
  -3  -5  -9    3.53    5.75
   3   5   9   17.07   10.30
  -3  -5  -9    0.28   10.68
   0  -7   0    8.78    8.90
   0  -7   0   17.47    6.18
  -2  -6   7 1528.14   87.95
  -2   6   7 1563.81   93.97
   2  -6  -7 1563.12   86.05
   2  -6  -7 1460.82   79.19
  -3  -6   5    1.92    1.49
  -3  -6   5    9.89    7.89
  -3   6   5   12.88    8.24
   3  -6  -5    9.90    4.10
   3  -6  -5   34.72   13.93
  -3   6   5    1.83    2.65
   3  -6  -5    5.61    3.71
  -2  -6  -7  478.55   52.04
   2  -6   7  349.91   41.81
  -2  -6  -7  333.25   41.33
  -2  -6  -7  439.00   64.44
   2  -6   7  355.00   35.31
   2  -6   7  419.99   47.14
   2   6   7  425.97   44.75
  -3  -6  -5  209.70   37.63
  -3  -6  -5  152.61   34.60
   3   6   5  176.56   26.12
   3  -6   5  228.95   30.36
  -6  -3   6   20.13   14.79
   6  -3  -6   33.35    8.42
   6  -3  -6   29.59   10.39
   6   3  -6   54.47   20.03
   6  -3  -6   32.26    8.45
  -6   3   6   44.91   10.84
  -6   3   6   41.05    6.07
  -6  -3   6   27.24    5.16
  -1  -5  11   12.08    8.52
   1  -5 -11    5.86    8.98
  -1  -5  11    8.48    7.06
   1  -5 -11    1.98    1.75
  -1   5  11    3.27    3.51
   4  -5  -7  231.26   15.56
   4   5  -7  207.47   15.61
   4  -5  -7  238.53   17.81
  -4   5   7  220.55   25.60
  -4  -5   7  205.84   46.63
   1  -5  11  580.56   57.10
  -1   5 -11  483.46   46.12
   1   5  11  522.72   52.28
  -1  -5 -11  525.19   75.33
  -1  -5 -11  498.39   59.60
   1  -5  11  522.40   52.24
   1  -5  11  557.13   51.49
   1   5  11  466.16   49.41
  -1  -5 -11  547.37   51.67
   0   7  -1 1024.79   91.55
   0  -7  -1 1195.28  104.73
   0  -7   1 1124.89  107.89
   0  -7   1  912.60   80.64
   0  -7  -1 1086.12   91.42
   0  -7  -1 1194.40  110.37
   0   0 -16   17.91   17.28
   0   0  16   11.99    4.96
   0   0  16   25.29   16.79
   6  -3   6 2461.27  134.73
  -6  -3  -6 2896.80  151.84
  -6   3  -6 2651.28  140.82
  -6   3  -6 2786.08  150.09
  -6  -3  -6 2666.46  143.64
   6   3   6 2419.31  135.08
   6   3   6 2302.44  118.43
   6  -3   6 2497.85  144.95
   1  -6  -8 1938.86  100.85
  -1  -6   8 1925.64  109.06
  -1   6   8 1769.36  102.12
   1  -6  -8 1898.13  107.55
  -4  -5  -7   30.67   19.43
   4  -5   7   58.96   20.89
   4   5   7    9.19    7.33
  -4  -5  -7   28.17   10.27
  -4  -5  -7   33.04   11.25
   1  -6   8    6.14   12.74
   1   6   8    8.51    3.98
  -1  -6  -8   12.75    5.21
  -1  -6  -8    7.67    8.78
   1  -6   8   13.79    6.10
   1  -6   8    8.48    4.68
  -1  -6  -8   24.36   10.62
   6  -4   0  711.33   63.64
   6  -4   0 1051.41  114.27
   6  -4   0  745.45   64.28
  -6  -4   0  837.86   72.92
   6   4   0  787.87   73.80
  -6  -4   0  846.26   77.84
  -6   4   0  784.97   68.57
   7  -2   0    9.23    9.12
  -7  -2   0   17.49    4.03
   7   2   0    8.16    7.02
  -7  -2   0   51.82   22.55
  -7   2   0   24.72   12.21
   7   1  -4    9.31    7.82
  -7  -1   4   18.96    3.29
  -7   1   4    7.64    4.40
  -7  -1   4   12.91    9.70
   7  -1  -4   11.66    8.59
   7  -1   4   61.41    7.60
  -7   1  -4   91.58   14.07
   7  -1   4  128.91   23.94
   7   1   4   56.81   24.96
  -7  -1  -4   98.62   20.73
  -7  -1  -4   70.99   13.74
  -1   4  13  199.06   17.71
   1   4 -13  189.36   18.85
  -1  -4  13  220.64   19.39
  -1  -4  13  246.55   46.63
   1  -4 -13  212.30   21.08
   1  -4  13  307.31   44.41
  -1   4 -13  225.30   19.67
   1  -4  13  253.94   56.70
   1   4  13  244.36   19.62
   1  -4  13  261.25   53.66
  -1  -4 -13  253.39   15.93
   1   4  13  224.78   29.79
  -1  -4 -13  267.86   24.69
  -1  -4 -13  259.54   20.46
   6  -4  -1   61.87   11.09
   6   4  -1   57.54   20.20
   6  -4  -1   87.96   20.56
   6  -4  -1   54.27   12.02
  -6  -4   1   82.99   17.76
  -6   4   1   76.78   16.62
  -6  -4   1   52.73   11.93
   6  -4   1  539.39   52.29
   6  -4   1  526.11   50.77
  -6  -4  -1  636.14   61.56
   6   4   1  557.76   53.20
  -6  -4  -1  576.23   54.49
   6  -4   1  608.14   82.72
  -6   4  -1  714.16   65.20
  -7   2   1  743.20   67.61
  -7  -2   1  749.91   74.48
   7   2  -1  636.45   72.64
   7  -2  -1  699.95   98.05
  -7  -2   1  717.06   61.89
  -7   2  -1  179.61   29.94
   7  -2   1  243.32   60.53
  -7  -2  -1  190.80   34.08
   7   2   1  202.45   22.51
  -7  -2  -1  195.82   15.05
   6  -2  -8  154.50   25.01
  -6  -2   8  221.72   35.89
  -6   2   8  199.79   28.81
  -6   2   8  228.10   45.10
  -6   2   8  176.67   20.81
   6  -2  -8  184.26   26.91
  -6  -2   8  135.86   24.33
   6   2  -8  195.03   39.34
   6   2   8  387.70   71.27
   6  -2   8  368.56   42.11
   6  -2   8  308.42   39.66
  -6   2  -8  316.53   42.07
  -6  -2  -8  451.22   71.17
  -6  -2  -8  380.69   73.95
  -6   2  -8  296.49   39.66
  -6  -2  -8  362.23   42.72
   0  -7  -2  122.11   24.71
   0  -7  -2  111.06   17.72
   0  -7  -2  117.81   36.08
   0  -7   2   72.95   13.99
   0   7  -2   94.32   15.05
   0  -7   2  128.60   39.31
  -3   3  13 2015.84  115.39
   3  -3 -13 1904.05  103.88
  -3  -3  13 1907.45  101.33
   3   3 -13 1819.27   93.42
  -3  -3  13 1982.53  107.47
   6   1  -9  502.35   54.86
  -6   1   9  445.96   52.50
   6  -1  -9  539.74   52.65
  -6   1   9  546.79   59.02
  -6  -1   9  538.84   54.08
   6  -1  -9  495.92   46.94
  -6  -1   9  517.38   53.30
  -6   1   9  533.73   49.67
  -5  -5   3    8.93   14.27
   5  -5  -3    2.38    4.81
   5   5  -3    5.80    5.15
  -5  -5   3    6.98    3.20
  -3  -3 -13  809.62   85.17
   3   3  13  952.79  101.99
  -3  -3 -13  928.06   89.28
  -3  -3 -13  924.84   82.38
  -3  -3 -13  769.56   72.62
   3  -3  13  733.59   67.42
  -5  -5  -3   23.61   21.39
   5   5   3   20.52   15.16
   5  -5   3   19.38    3.62
   5  -5   3   11.05    8.58
  -5  -5  -3   11.70    4.05
  -6  -1  -9    2.06    6.21
  -6   1  -9   53.38   24.51
  -6  -1  -9   13.19    5.32
  -6  -1  -9   16.62   12.06
  -6   1  -9   14.49   12.83
   6   1   9   13.16    5.04
   6  -1   9   11.85    4.60
  -6  -1  -9   15.89    6.44
   6  -1   9   14.96   10.30
   6   1   9    9.47    5.91
  -6   1  -9    1.70    3.80
   1  -7   0  831.30   74.11
  -1   7   0  750.44   64.45
   1  -7   0  766.15   64.46
  -1  -7   0  751.64   68.71
  -1  -7   0  782.46   82.21
  -3   2  14  490.91   42.87
  -3  -2  14  577.69   54.35
  -3  -2  14  587.84   60.55
  -3   2  14  492.78   43.39
   3   2 -14  625.40   60.24
   3  -2 -14  579.80   59.49
   3   2 -14  537.64   51.31
  -3   2  14  493.66   84.60
   4   4 -10  872.51   75.65
  -4   4  10  864.92   77.20
  -4  -4  10  926.21   90.73
   4  -4 -10  834.03   71.77
  -3  -2 -14  409.67   42.86
  -3  -2 -14  429.66   48.99
  -3   2 -14  361.01   50.59
   3   2  14  376.81   60.37
   3  -2  14  461.12   58.99
  -3  -2 -14  419.64   42.56
   6  -4  -2 1356.99   76.04
   6  -4  -2 1325.51   75.30
   6  -4  -2 1435.53   75.34
  -6   4   2 1356.78   80.03
   6   4  -2 1261.12   44.85
   6  -4  -2 1568.03   88.87
  -6  -4   2 1584.30   89.95
   4   4  10   26.24   16.62
   4  -4  10   53.34   25.00
  -4  -4 -10   81.18   20.05
  -4  -4 -10   69.17   13.85
   4  -4  10   63.87   11.73
  -4  -4 -10   52.55   31.13
   7   2  -2  293.78   44.62
  -7  -2   2  297.98   34.75
  -7   2   2  270.91   18.02
   7  -2  -2  337.02   60.45
  -7  -2   2  282.08   29.85
  -6   4  -2   46.16   16.97
   6  -4   2   74.43   17.00
  -6  -4  -2   98.94   25.40
  -6  -4  -2   71.19   21.37
  -7  -2  -2  249.94   14.70
  -7   2  -2  204.13   38.27
   7   2   2  248.72   58.41
   7  -2   2  310.87   56.50
  -7  -2  -2  262.40   19.79
  -7   0   5  743.26   69.30
   7   0  -5  700.18   62.69
  -7   0   5  619.46   55.28
   1  -7  -1   16.54   13.88
  -1  -7   1   18.02    4.72
   1  -7  -1   16.67    3.59
  -1  -7   1   17.82    6.17
   1  -7  -1   47.58   15.41
  -1   7  -1   29.16    5.62
  -1  -7  -1   53.61   14.51
  -1  -7  -1   25.45   12.24
   1  -7   1   67.80   25.34
  -1  -7  -1   20.74   12.66
  -7   0  -5  729.49   64.87
   7   0   5  653.20   59.91
  -7   0  -5  669.21   62.16
   7   0   5  693.08   74.44
  -7   0  -5  745.50   79.29
  -1   0  16    8.58    5.86
   1   0 -16   -4.22    9.64
  -1   0  16    2.67   13.78
  -1   0 -16    8.00   12.13
   1   0  16    2.41   16.55
   0   1 -16 2380.49  128.15
   0  -1  16 2290.17  124.51
   0  -1 -16 2219.21  123.15
   0  -1  16 2126.79  115.93
   0   1  16 2368.03  128.79
   0  -1  16 2069.48  117.15
   0   1  16 2126.91  110.68
  -5   2  11   11.71    3.96
   5   2 -11   14.17    8.84
   5  -2 -11   19.84    5.81
  -5  -2  11   -0.05    5.01
   5  -2 -11   31.07   10.72
  -5   2  11    7.90    2.68
  -5  -2  11   21.31   18.44
  -5   2  11    0.34    9.86
  -2   3  14 1059.73   85.00
   2  -3 -14 1072.54   93.89
  -2  -3  14  976.56   85.67
  -2  -3  14 1068.01   91.81
  -2   3  14 1094.72   87.82
   2   3 -14  895.41   74.42
  -2   3  14 1078.02  110.62
  -2  -3 -14   14.56    5.83
   2   3  14   40.38   14.28
  -2  -3 -14   23.29    6.90
  -2   3 -14   41.09   11.77
  -2   3 -14   52.65   18.12
  -2  -3 -14   33.16   12.30
   2  -3  14   45.56   13.73
  -5  -2 -11 2284.34  128.27
  -5  -2 -11 2428.29  133.33
  -5   2 -11 2470.74  138.91
  -5  -2 -11 2218.69  126.56
   5   2  11 2319.86  133.78
  -5   2 -11 2175.96  115.43
  -5   2 -11 2427.63  136.10
  -5  -2 -11 2541.46  134.36
   5  -2  11 2352.80  129.36
   1  -7  -2   13.55    8.33
  -1  -7   2   18.34    9.89
  -1  -7   2    3.80    5.02
   1  -7  -2    4.69    9.50
   1  -7  -2   30.41    6.14
   1   7  -2   15.93    5.06
  -1   7  -2  871.83   72.88
  -1  -7  -2  984.72   87.63
   1  -7   2  947.67   86.18
  -1  -7  -2  953.24   82.13
   0  -7  -3  120.71   11.21
   0  -7  -3   85.46   22.14
   0  -7  -3   99.69   23.92
   0  -7   3   77.06   12.23
   0  -7   3  111.57   26.43
   0   7  -3   90.97   15.80
  -5   0  12   11.50   12.32
   5   0 -12    4.34    4.77
  -5   0  12   14.54    7.72
   5   0 -12    5.40    3.53
  -4  -6   0   16.43    6.27
  -4  -6   0    8.72    8.95
   4   6   0    1.60   11.50
   4  -6   0   18.58   11.33
  -5   0 -12   21.09   17.11
  -5   0 -12   -0.41    7.30
   5   0  12    7.40   11.21
  -5   0 -12   -3.72   10.45
   2   2 -15    7.05   15.98
   2  -2 -15    1.38    9.42
  -2   2  15    8.32    2.90
  -2   2  15   20.76    8.96
  -2   2  15    3.41    2.29
  -2  -2  15    0.73   16.27
   2   2 -15   10.16    6.39
  -2   2  15   -0.24    1.98
  -2  -2  15   -7.80    7.78
   2  -2  15  270.37   29.30
  -2   2 -15  257.62   63.77
  -2  -2 -15  285.20   36.00
   2   2  15  260.32   28.30
   4   6  -1 1352.47   75.11
  -4  -6   1 1442.93   82.88
   4  -6  -1 1313.08   80.76
  -4  -6   1 1231.81   34.84
   4  -6  -1 1361.07   74.32
  -4  -6  -1 2999.14  159.59
   4  -6   1 3047.52  163.19
  -4  -6  -1 3213.89  171.21
   4   6   1 2921.72  154.23
  -4  -6  -1 2732.76  142.77
   4  -6   1 3089.16  162.48
  -6  -4   3  213.50   29.62
   6  -4  -3  258.94   38.92
   6   4  -3  284.54   13.74
   6  -4  -3  302.59   38.29
  -6  -4   3  264.67   45.86
   6  -4  -3  302.22   29.89
  -6   4   3  356.47   46.44
   6  -4  -3  302.43   74.80
   7   2  -3   67.58   19.57
  -7   2   3   59.77   10.11
   7  -2  -3   78.31   22.70
  -7  -2   3   64.09   17.60
  -6  -4  -3 2152.11  122.17
  -6   4  -3 2244.62  133.75
   6  -4   3 1905.43  100.80
  -6  -4  -3 2086.66  109.89
  -6   4  -3 2080.02  108.78
   6   4   3 2138.16  118.75
   6  -4   3 2277.39  120.85
  -7   2  -3  405.62   49.14
   7   2   3  451.26   45.28
  -7  -2  -3  375.87   52.64
   7  -2   3  429.00   50.91
   7  -2   3  347.33   31.60
  -7  -2  -3  363.42   36.37
  -7   1   5 1835.43   96.55
  -7  -1   5 1851.76  105.05
   7   1  -5 1932.75  105.78
  -7  -1   5 1788.19   91.52
  -7   1   5 1755.44   87.85
   7  -1  -5 1788.95  104.42
  -7  -1  -5 1032.01   90.34
   7   1   5 1108.31   96.97
  -7   1  -5  977.69  102.59
   7  -1   5  904.94   76.27
   7   1   5  867.41   72.17
   7  -1   5 1051.90  105.50
  -7  -1  -5  890.78   77.31
  -1  -1  16  165.41   17.50
  -1   1  16  141.52   15.99
  -1   1  16  132.55   32.29
  -1   1  16  186.32   16.69
  -1  -1  16  149.95   46.45
   1  -1 -16  205.66   24.07
   1   1 -16  177.28   68.45
   1  -1  16  489.42   49.66
   1   1  16  430.24   46.14
  -1   1 -16  443.53   49.17
  -1  -1 -16  556.82   55.55
   1   1  16  595.76   69.82
   5  -5  -4  173.86   21.54
  -5  -5   4  128.32   19.72
   5   5  -4  177.23   10.85
  -5  -5   4  195.97   35.81
   5  -5   4 1379.99   87.96
   5   5   4 1424.25   85.22
  -5  -5  -4 1339.44   92.99
  -5  -5  -4 1334.58   79.47
   3  -6  -6 2405.93  124.09
  -3  -6   6 2343.62  116.55
   3  -6  -6 2424.56  125.05
  -3   6   6 2377.23  122.62
   3  -6  -6 2531.55  137.20
  -3   6   6 2510.27  131.81
  -3  -6   6 2573.19  142.05
  -4  -2  13  855.21   75.48
   4  -2 -13  957.58   89.71
  -4   2  13 1063.08   92.88
  -4  -2  13  885.44   75.03
   3  -6   6 3456.98  180.29
   3  -6   6 3074.91  155.70
   3   6   6 3308.40  175.10
  -3  -6  -6 3534.25  191.77
   3  -6   6 3286.99  168.21
  -3  -6  -6 3230.66  173.28
   3  -6   6 3041.30  151.91
  -3  -6  -6 3273.39  174.23
   5  -3 -10  125.30   26.06
  -5   3  10  185.41   26.90
  -5   3  10  150.78   16.23
   5  -3 -10  128.31    7.53
  -5  -3  10  153.03   41.17
  -5   3  10  158.08   25.19
   5   3 -10  131.73   22.03
  -4  -2 -13  659.23   78.86
  -4  -2 -13  412.30   50.42
  -4  -2 -13  482.78   59.14
  -4   2 -13  456.21   44.16
   4  -2  13  550.18   53.95
   4   2  13  488.91   98.46
   5  -3  10 1510.84   85.14
  -5   3 -10 1470.43   80.33
   5   3  10 1502.84   94.56
  -5  -3 -10 1475.58  106.97
  -5  -3 -10 1726.65   94.96
  -5  -3 -10 1499.62   91.91
   5  -4  -8   46.78   14.80
  -5   4   8   56.84   15.46
  -5   4   8  109.34   23.86
  -5  -4   8   74.60   17.36
   5  -4  -8   69.23    8.19
   5  -4  -8   46.38   11.80
   5   4  -8   62.23   14.28
  -5   4   8   37.14   10.95
   4   3 -12  255.63   16.40
  -4   3  12  194.74   50.92
  -4  -3  12  262.56   56.01
  -4   3  12  202.89   10.67
   4  -3 -12  295.46   31.98
  -4  -3  12  249.84   25.72
   5   4   8 1921.30  108.45
  -5  -4  -8 2074.93  120.18
  -5  -4  -8 1851.92  103.87
   5  -4   8 1907.00  109.09
  -5  -4  -8 1918.31  104.07
  -4  -3 -12   96.93   27.77
  -4  -3 -12  120.37   23.15
  -4  -3 -12  101.57   30.92
   4   3  12  109.50   30.71
   4  -3  12   98.28   22.49
  -4  -3 -12  111.68   27.48
  -3   0  15 2125.24  110.84
  -3   0  15 2364.35  129.80
   3   0 -15 2448.74  130.43
   4  -6  -2  166.58   17.03
  -4  -6   2   94.49   15.80
   4   6  -2  126.43   28.69
   4  -6  -2  122.97   19.15
  -4  -6   2  128.06   24.22
  -4  -6  -2  506.87   54.13
  -4  -6  -2  498.66   49.42
   4  -6   2  513.89   66.07
   4   6   2  411.67   41.00
   4  -6   2  496.50   51.59
   0   6   9 1385.46   80.83
   0  -6   9 1466.77   73.70
   0  -6   9 1544.56   83.71
   0   6  -9 1438.86   79.77
   0  -6  -9 1331.15   75.91
   0  -6  -9 1482.96   86.03
   0  -6  -9 1477.03   82.55
   0  -6   9 1500.99   95.49
   3   0  15 2651.78  148.93
  -3   0 -15 2751.86  156.16
  -1  -7   3  441.78   46.78
   1  -7  -3  409.34   40.62
   1  -7  -3  488.05   62.92
   1  -7  -3  417.66   50.58
  -1  -7   3  529.42   60.32
   1   7  -3  420.13   50.77
  -1  -7  -3   11.23    6.28
  -1  -7  -3   19.96    7.37
   1  -7   3   22.58   15.09
  -1   7  -3    0.95    2.37
  -1  -7  -3   23.66   13.44
   6   3  -7 2848.19  147.61
  -6   3   7 2916.59  152.29
   6  -3  -7 2884.11  146.84
  -6   3   7 2810.91  145.68
   6  -3  -7 2654.09  134.15
  -6  -3   7 2981.11  155.38
   6   3   7  321.25   37.17
   6  -3   7  252.07   33.89
  -6   3  -7  345.16   43.63
  -6  -3  -7  381.57   40.98
  -6  -3  -7  311.04   69.49
   6  -3   7  352.77   72.18
  -6   3  -7  303.20   37.13
  -5  -1  12   19.44   12.38
   5  -1 -12    3.36    1.99
   5   1 -12    5.00    5.00
   5  -1 -12   -0.92   14.30
  -5   1  12    2.36    2.10
  -5  -1  12    7.96    4.89
   5   1 -12   10.17    7.66
  -5   1  12   -0.38    9.78
  -5   1 -12  268.61   52.37
  -5   1 -12  245.20   20.89
  -5  -1 -12  230.53   22.28
  -5   1 -12  269.92   25.27
   5   1  12  281.29   25.05
  -5  -1 -12  214.18   51.22
   5  -1  12  304.10   36.04
  -5  -1 -12  290.15   42.84
  -2  -5  11 1904.62  129.36
   2  -5 -11 1679.37   84.57
  -2  -5  11 1825.05  115.24
   2  -5 -11 1850.76  100.44
  -2   5 -11  216.79   32.79
  -2  -5 -11  208.82   20.03
   2  -5  11  166.64   30.25
   2   5  11  234.07   41.80
  -2  -5 -11  233.76   56.16
   2  -5  11  204.87   21.85
  -2  -5 -11  260.99   28.62
   2  -5  11  218.77   15.52
   2  -5  11  232.66   34.22
  -3  -4  12  452.64   63.63
   3  -4 -12  475.02   52.35
   3   4 -12  407.77   36.98
  -3   4  12  511.11   49.67
   3   4 -12  453.46   42.57
  -3  -4  12  523.26   63.70
  -2  -6   8   14.77    9.00
   2  -6  -8    5.49   12.20
  -2   6   8   32.54   10.71
   2  -6  -8    1.63    1.38
   2  -6  -8   -0.34    2.69
   2  -6   8  113.04   18.97
   2  -6   8  173.68   52.36
  -2  -6  -8  158.41   35.35
  -2  -6  -8  164.64   31.34
  -2  -6  -8  183.31   28.01
   2  -6   8  139.65   19.97
   2   6   8  184.18   39.30
  -3  -4 -12  327.89   58.63
   3  -4  12  374.66   44.74
   3   4  12  352.71   86.09
  -3  -4 -12  342.96   56.51
  -3  -4 -12  443.44   56.80
  -3   4 -12  290.84   47.84
  -4   5   8    5.73    3.24
   4  -5  -8    4.80    6.83
   4  -5  -8    4.53    3.20
   4  -5  -8    2.59    2.35
  -4  -5   8    8.54    9.35
   0   7  -4   60.16   20.72
   0  -7   4  128.80   49.76
   0  -7  -4  112.20   32.26
   0  -7   4   62.64    9.77
   0  -7  -4   61.85   16.64
   0  -7  -4  135.42   31.70
  -4  -5  -8  199.82   52.49
   4  -5   8  205.73   43.50
  -4  -5  -8  286.11   18.93
  -4  -5  -8  229.16   30.26
   4   5   8  176.46   40.64
   2   4 -13 2142.95  107.52
   2  -4 -13 2445.36  135.30
  -2   4  13 2452.96  131.56
  -2  -4  13 2460.49  133.32
  -2  -4  13 2539.97  137.21
  -7   0   6   11.20    8.48
   7   0  -6    3.56    6.82
  -7   0   6    2.39    1.88
  -2  -4 -13 1934.54  103.40
  -2  -4 -13 1912.88  119.91
   2   4  13 2052.28  115.07
   2  -4  13 1879.48  107.73
  -2  -4 -13 2101.49  127.35
  -2   4 -13 1778.93   96.20
  -2  -4 -13 1969.12  115.11
   2  -4  13 2026.88  110.60
   7   0   6    1.89    2.06
  -7   0  -6    4.10    8.55
   7   0   6   -1.51    8.49
  -7   0  -6    3.41    4.71
  -7   0  -6    1.76   15.38
   0   3 -15  175.21   29.81
   0   3 -15  180.11   54.11
   0  -3  15  212.21   27.44
   0   3  15  150.48   23.47
   0  -3  15  108.59   35.85
   0  -3  15  166.90   55.47
   0  -3 -15  120.25   30.30
   6  -4  -4   26.51    5.73
  -6  -4   4    5.63    8.97
   6  -4  -4   21.05    6.87
   6  -4  -4    8.16    5.30
  -6   4   4    0.59    5.12
   6  -4  -4   -1.33   12.23
  -6  -4   4   12.48    6.52
   6   4  -4   33.17    9.80
  -7  -2   4  692.04   64.39
   7  -2  -4  879.06   84.80
   7   2  -4  737.00   69.27
  -7  -2   4  826.84   74.38
  -6   4  -4  602.99   70.22
   6  -4   4  553.78   56.59
  -6  -4  -4  576.53   57.52
   6   4   4  584.11   76.44
  -6   4  -4  567.33   55.19
   6  -4   4  596.64   72.19
  -6  -4  -4  659.03   74.52
  -7  -2  -4    6.59    8.43
   7   2   4    6.42    7.65
   7  -2   4    5.83   10.57
  -7   2  -4   11.84    6.44
  -7  -2  -4    7.11    4.58
  -4   0  14 1695.60   88.48
   4   0 -14 1610.81   88.02
  -4   0  14 1761.80  122.41
  -6   0  10  149.45   33.40
   6   0 -10   70.94   17.14
   6   0 -10  127.68   21.29
  -6   0  10  125.29   17.42
   6   0 -10  141.38   33.47
  -6   0  10   94.11   11.33
  -1   6   9    5.24    3.22
  -1   6   9   22.87    5.95
   1  -6  -9    8.72   11.27
   1  -6  -9    9.90    2.98
  -1  -6   9    9.86   12.31
   1  -6   9  251.66   56.77
   1   6   9  179.51   28.30
  -1  -6  -9  210.79   32.74
   1  -6   9  241.12   17.59
  -1  -6  -9  287.30   42.90
   1  -6   9  307.76   39.44
  -1  -6  -9  233.41   59.58
   4   0  14   89.85   22.90
  -4   0 -14   69.05   35.24
  -4   0 -14   61.78   35.28
  -4   0 -14   51.04   10.89
   4  -6  -3   15.32    9.56
  -4  -6   3    9.45   18.45
   4  -6  -3    4.80    6.77
   4   6  -3   19.74    6.97
  -4  -6   3   12.90    5.23
   4  -6  -3    4.37    8.45
  -3   5  10 1044.42   92.91
   3  -5 -10 1093.04  109.93
  -3   5  10  956.27   87.90
   3  -5 -10  947.26   76.16
  -3  -5  10 1054.12  106.20
   4   6   3  127.74   27.95
   4  -6   3  150.24   35.82
  -4  -6  -3  132.42   43.52
   4  -6   3  102.71   26.09
  -4  -6  -3  146.26   31.45
   3   1 -15  443.43   43.83
   3  -1 -15  450.33   67.72
  -3   1  15  425.05   44.85
  -3  -1  15  386.81   52.32
  -3   1  15  324.34   78.03
  -3  -1  15  301.47   39.49
  -6   0 -10  127.09   45.90
   6   0  10  183.93   40.58
  -6   0 -10  145.18   34.82
   6   0  10  126.77   17.73
  -6   0 -10  185.05   41.63
   3  -5  10  497.73   48.59
  -3  -5 -10  535.76   60.91
  -3  -5 -10  479.19   58.35
   3  -5  10  506.48   48.17
   3   5  10  457.03   49.92
  -3   5 -10  423.70   50.87
  -3  -5 -10  536.16   52.85
   3  -5  10  449.81   56.85
   3   1  15  147.83   31.04
  -3   1 -15  141.86   30.50
  -3  -1 -15  160.29   30.80
   3  -1  15  103.66   30.47
  -3  -1 -15  129.54   42.77
   0  -5  12   -2.37    8.95
   0  -5  12    0.22    2.19
   0   5 -12    6.35    2.59
   0  -5  12   15.88    6.56
   0  -5 -12    1.56    0.78
   0  -5 -12    4.13    8.57
   0  -5 -12    9.74    2.85
   0   5  12    0.32    2.69
   2  -7   0  191.93   48.97
  -2  -7   0  149.31   33.12
  -2  -7   0  213.80   59.27
  -6  -2   9  108.03   27.56
   6  -2  -9  162.51   26.07
   6  -2  -9  111.67   19.39
  -6   2   9   97.97   19.41
   6   2  -9  134.55   26.22
  -6  -2   9   91.06   18.54
  -6   2   9  114.39   14.95
  -6   2   9  206.86   38.95
  -6  -2  -9  451.63   53.14
  -6   2  -9  412.70   80.90
   6  -2   9  530.35   60.87
   6   2   9  575.81   58.30
  -6  -2  -9  412.70   86.53
  -6   2  -9  434.67   46.04
  -6  -2  -9  511.48   51.83
   6  -2   9  404.16   49.35
  -2   0  16 1970.62  125.92
   2   0 -16 1849.49  100.07
  -2   0  16 1918.58  106.55
  -2   7   1    0.78    1.51
   2  -7  -1    6.31    9.40
  -2  -7   1    4.54    6.24
   2  -7  -1    9.42    6.72
  -2  -7   1    5.24    2.32
  -2  -7  -1 1214.94   37.43
  -2  -7  -1 1151.85   99.59
  -2  -7  -1 1294.49   93.32
   2  -7   1 1159.20  109.61
   5  -5  -5   12.50    5.40
   5  -5  -5    8.71    5.01
  -5  -5   5   23.39    8.28
   5  -5  -5    4.00    3.27
  -5  -5   5    7.12    3.17
   5   5  -5   17.15    5.69
   2   0  16  702.21   58.43
  -2   0 -16  714.29   65.60
   5  -5   5   60.95   18.56
   5   5   5   13.45   12.56
  -5  -5  -5   16.76   13.30
  -5  -5  -5   37.12   20.31
   1  -7  -4  630.49   59.48
  -1  -7   4  678.11   63.70
   1  -7  -4  746.38   70.62
   1   7  -4  662.82   84.26
  -1  -7   4  746.31   91.20
   1  -7  -4  840.28   86.47
  -1  -7  -4    6.55    7.95
  -1  -7  -4    5.10    5.89
   1  -7   4    2.83    6.23
   1  -7   4    4.49   14.82
  -1  -7  -4    0.45    6.69
  -1  -3  15 1009.16   88.82
  -1  -3  15 1067.30   91.19
   1  -3 -15 1062.38   99.88
   1   3 -15  952.86   80.80
  -1   3  15  964.77   79.73
  -7   1   6  139.97   16.12
  -7   1   6  129.87   19.13
   7  -1  -6  127.04   23.80
   7   1  -6  169.61   43.69
  -7  -1   6  197.13   40.18
  -1   3 -15  358.16   37.94
   1  -3  15  320.51   34.93
  -1   3 -15  371.47   38.70
   1   3  15  341.71   38.95
   1  -3  15  390.99   50.68
  -1  -3 -15  368.16   48.28
   1  -3  15  346.06   80.58
   1   3  15  404.45   44.12
   0   2 -16    1.26    3.81
   0   2  16   12.47    8.58
   0  -2  16    0.48    9.63
   0  -2  16   35.95   21.05
   0   2  16   30.08    8.99
   0  -2  16   21.51    8.02
   0   2 -16   15.52    6.77
   0  -2 -16   32.65    7.35
   7  -1   6  315.62   32.17
  -7   1  -6  312.45   46.57
   7   1   6  271.43   23.19
   7   1   6  323.90   61.53
  -7  -1  -6  389.73   75.92
   7  -1   6  265.05   51.96
  -7  -1  -6  306.55   32.04
   4  -1 -14  913.06   80.09
  -4  -1  14  762.81   67.50
  -4   1  14  803.67   78.10
   4   1 -14  744.99   70.50
  -4   1  14  816.03   72.96
  -4  -1  14  774.76   74.49
   4   1 -14  906.05   81.44
  -6  -1  10 1243.35   51.67
   6  -1 -10 1283.31   72.34
  -6  -1  10 1300.67   74.49
  -6   1  10 1349.20   72.71
  -6   1  10 1178.71  104.93
  -6  -1  10 1468.71   82.28
  -6   1  10 1293.20   78.93
   6  -1 -10 1230.43   23.82
   6   1 -10 1457.52   87.00
  -2  -7   2  129.07   18.44
  -2  -7   2  158.23   54.99
   2  -7  -2  148.01   20.93
   2  -7  -2  118.64   32.34
   2  -7   2   67.75   23.25
  -2  -7  -2   64.94   14.29
  -2  -7  -2   39.40   31.50
   4   1  14 3328.42  175.49
   4  -1  14 3244.60  178.77
  -4  -1 -14 3142.09  170.60
  -4   1 -14 3301.30  173.05
  -4  -1 -14 3208.23  174.29
  -4  -1 -14 3283.63  174.90
  -6  -1 -10 1608.57   85.55
  -6   1 -10 1528.31   83.70
  -6  -1 -10 1639.46   93.63
   6  -1  10 1551.03   92.18
  -6   1 -10 1561.39   86.67
  -6  -1 -10 1476.28   82.12
   6   1  10 1611.30   95.25
   6  -1  10 1390.27   85.26
  -6  -1 -10 1668.63   93.30
  -6   1 -10 1566.01   94.07
   1  -5 -12 2456.85  124.30
  -1  -5  12 2735.32  148.80
  -1  -5  12 2768.07  153.49
   1  -5 -12 2660.27  149.83
  -1  -5 -12 1132.11  119.41
   1  -5  12 1214.49   62.34
   1  -5  12 1038.88   85.48
   1  -5  12  913.89   85.83
   1   5  12 1036.21   95.91
  -1  -5 -12 1078.65   93.76
   1   5  12 1079.59   92.74
  -1  -5 -12 1210.96   34.93
   0  -4  14  429.77   47.27
   0   4  14  432.44   44.26
   0  -4 -14  508.81   49.87
   0  -4  14  404.71   45.81
   0  -4  14  511.32   78.35
  -3  -6   7   36.93   11.91
   3  -6  -7   26.87    7.54
  -3   6   7   46.61    7.29
  -3   6   7   32.88    9.02
   3  -6  -7   67.62   13.35
   3  -6  -7   43.85   23.95
  -3  -6  -7   17.11    7.26
   3  -6   7   36.80   13.02
   3   6   7    9.90    7.36
   3  -6   7    4.49    9.51
   3  -6   7   10.56    3.71
  -3  -6  -7   31.04   15.37
   3  -6   7    5.32    2.87
   0  -7   5  830.25   75.46
   0  -7   5  904.47   76.35
   0  -7  -5  962.57   87.64
   0   7  -5  851.21   78.03
   0  -7   5 1019.64   90.27
   0  -7  -5  975.69   87.84
   0  -7  -5  789.34   72.66
   4  -6  -4   33.03   13.89
  -4  -6   4   16.37   18.05
  -4  -6   4   17.58    3.61
   4   6  -4    2.82    5.35
   4  -6  -4    8.05    6.84
  -4   6   4   12.22    3.26
   4  -6  -4    6.11    9.93
  -4   6   4   10.18    4.93
  -4  -6  -4  211.64   36.61
   4  -6   4  166.97   55.39
   4   6   4  150.23   29.87
   4  -6   4  169.27   37.60
  -4  -6  -4  119.29   31.89
  -2   1  16  995.93   88.15
  -2  -1  16  971.81   85.04
   2  -1 -16 1027.50   91.94
  -2   1  16 1015.86   89.37
   2   1 -16  969.08   86.02
  -2  -1  16 1000.38   89.36
  -2   1 -16  437.61   46.09
   2  -1  16  437.75   60.48
  -2  -1 -16  425.86   51.06
   2   1  16  429.59   57.34
  -4  -4  11  380.59   43.26
   4  -4 -11  437.36   47.37
  -4   4  11  374.96   38.06
   4   4 -11  382.64   41.24
  -4  -4  11  375.06   40.37
  -6  -4   5 1077.94   89.82
  -6  -4   5 1192.43  101.43
   6  -4  -5 1114.17   92.75
   6  -4  -5 1219.60   30.15
   6  -4  -5 1098.84   97.98
   6   4  -5 1118.20   93.16
  -6   4   5 1364.55   74.75
   7  -2  -5  685.40   60.73
   7   2  -5  897.46   78.75
  -7   2   5  761.60   70.02
  -7  -2   5  819.21   73.72
   7  -2  -5  745.86   81.98
  -7  -2   5  727.76   63.59
   7  -2  -5  600.32   59.52
  -4  -4 -11    5.61    7.91
  -4  -4 -11   14.20   12.20
  -4  -4 -11   15.28   13.42
   4   4  11   12.37    8.60
   4  -4  11    1.86    7.12
   4  -4  11    4.93    6.15
   6   4   5    5.61    7.42
   6  -4   5   22.15   14.66
   6  -4   5   26.21    5.15
  -6  -4  -5   11.18    7.08
  -6   4  -5   28.13    7.52
  -6  -4  -5   56.54   16.28
   7  -2   5  704.73   36.87
  -7   2  -5  593.75   57.14
   7  -2   5  575.92   51.78
  -7  -2  -5  675.80   62.62
  -7  -2  -5  707.88   44.11
   7   2   5  662.74   64.25
  -1   2  16  325.03   36.53
   1   2 -16  263.97   33.69
  -1  -2  16  349.01   46.92
   1   2 -16  342.54   72.16
   1  -2 -16  414.45   42.43
  -1  -2  16  332.35   33.59
   1  -2  16  695.39   68.81
   1   2  16  635.47   67.82
  -1  -2 -16  801.28   78.38
  -1   2 -16  695.55   72.98
   1   2  16  763.76   71.77
   1  -2  16  637.32   60.78
  -7  -3   0 2264.11  133.03
   7   3   0 2349.24  126.49
   7  -3   0 2253.76  122.86
  -7  -3   0 2194.06  112.69
   7  -3   0 2046.79  102.04
   7  -3   0 1948.19   97.23
   7  -3   0 2006.98  113.43
  -7   3   0 2333.51  128.33
  -2  -7   3  974.68   83.85
   2  -7  -3 1076.37   93.11
  -2  -7   3  960.78   85.05
   2  -7  -3  884.78   85.38
  -2  -7  -3  463.76   51.29
  -2  -7  -3  588.24   71.60
   2  -7   3  493.93   71.69
   2  -7   3  510.85   70.00
   2  -7   3  469.16   40.96
  -7  -3   1  198.72   26.73
   7  -3  -1  189.80   14.24
   7  -3  -1  180.61   34.40
   7  -3  -1  218.11   32.94
   7  -3  -1  162.03   12.97
  -7   3   1  200.23   45.29
   7   3  -1  179.23   24.10
  -7   3  -1  395.09   74.76
   7  -3   1  331.11   33.07
  -7  -3  -1  427.74   43.60
   7  -3   1  367.88   33.37
  -7  -3  -1  454.49   62.90
   7   3   1  470.92   51.39
   7  -3   1  504.35   86.13
   6   3  -8   16.39    9.77
  -6  -3   8   19.01   12.75
  -6   3   8    4.83    5.43
   6  -3  -8    4.06    3.83
  -6   3   8   12.85    5.25
  -6   3   8   11.24    8.07
   6  -3  -8    1.01    2.39
  -1  -4  14 1729.43  116.41
   1   4 -14 1602.11   81.99
  -1  -4  14 1669.47   91.92
   1  -4 -14 1637.44  100.79
  -1   4  14 1579.95   80.36
  -1  -4 -14   25.23   10.40
   1  -4  14    2.98   13.09
  -1  -4 -14    5.62   10.09
  -1   4 -14   11.51    2.80
   1   4  14   -0.73    3.45
  -1  -4 -14   20.41    6.78
   1  -4  14    6.36    3.31
   1   4  14   15.65    8.42
  -6  -3  -8  627.37   74.21
  -6  -3  -8  695.57   71.58
   6  -3   8  692.81   66.81
   6   3   8  690.35   71.45
  -6  -3  -8  806.23   73.26
   6  -3   8  697.94   95.44
  -6   3  -8  622.51   66.72
  -6   3  -8  660.70   63.57
   5  -4  -9  341.40   39.61
   5  -4  -9  330.27   30.12
  -5  -4   9  387.21   48.74
   5  -4  -9  434.26   52.38
  -5   4   9  446.48   56.80
  -5   4   9  386.41   51.94
   5   4  -9  395.90   55.80
   7   0  -7  275.90   70.70
  -7   0   7  252.74   31.89
   5   4   9   66.56   14.51
   5  -4   9   50.92   18.85
  -5  -4  -9   89.65   31.50
  -5  -4  -9   59.68   24.68
  -5  -4  -9   52.10   19.69
  -1  -7   5   93.58   24.29
  -1  -7   5  101.48   12.71
   1   7  -5   87.96   19.72
   1  -7  -5   99.85   30.21
   1  -7  -5   87.57   34.28
   1  -7  -5   88.63   11.37
   1  -7   5  345.51   75.24
  -1  -7  -5  384.21   62.78
  -1  -7  -5  260.23   37.79
   1  -7   5  263.70   34.67
  -1  -7  -5  309.54   39.39
   7   0   7  591.45   52.66
  -7   0  -7  635.56   61.07
  -7   0  -7  619.05   66.30
   7   0   7  563.75   56.53
  -7   0  -7  569.82   49.54
   5  -2 -12  517.29   54.67
   5  -2 -12  522.37   45.72
  -5  -2  12  395.83   54.44
   5   2 -12  481.86   19.24
  -5   2  12  459.12   54.52
  -5  -2  12  608.48   55.63
  -5   2  12  489.45   37.60
  -5  -2 -12  128.50   29.62
  -5  -2 -12  180.14   50.71
  -5   2 -12  172.82   30.07
  -5  -2 -12  185.52   32.34
   5   2  12  113.29   35.98
   5  -2  12  110.37   30.76
  -5  -2 -12  171.35   20.46
  -5   2 -12  125.02   22.36
   3  -3 -14   16.97    9.87
  -3  -3  14   -0.21    8.14
   3   3 -14    2.03    4.39
  -3   3  14    6.32   17.03
  -3  -3  14   29.74   14.18
  -5  -5   6  473.27   54.74
  -5  -5   6  622.41   56.36
   5  -5  -6  503.51   46.36
   5   5  -6  511.58   49.37
   5  -5  -6  566.37   53.73
  -5   5   6  542.08   48.81
   5  -5  -6  556.71   51.41
  -3  -3 -14  503.02   45.50
  -3   3 -14  515.02   55.63
   3   3  14  549.26   55.19
   3  -3  14  566.73   56.06
  -3  -3 -14  596.07   61.24
  -3  -3 -14  567.54   62.53
  -3  -3 -14  589.94   60.47
   5   5   6  934.87   84.44
   5  -5   6  938.28  113.43
  -5  -5  -6  987.78   59.02
  -5  -5  -6  936.07   85.14
   7  -3  -2   93.18   29.32
  -7  -3   2  121.00   20.68
   7  -3  -2  104.44   13.75
   7  -3  -2   83.40   19.54
  -7   3   2  189.09   52.13
   7   3  -2  119.96   28.94
  -7  -3   2  136.50   36.29
  -7   3  -2  436.36   62.26
   7   3   2  422.97   74.08
   7  -3   2  449.89   73.06
  -7  -3  -2  457.10   67.14
  -7  -3  -2  401.80   56.17
   7  -3   2  369.06   44.84
   7  -3   2  384.84   44.76
   0  -6  10   12.04    5.92
   0  -6 -10   16.33    8.34
   0  -6  10    2.20    1.47
   0  -6 -10   34.24   17.63
   0   6  10   14.37    6.50
   0  -6  10   33.34   20.34
   2  -6  -9  381.64   46.31
   2  -6  -9  338.28   39.61
  -2   6   9  351.82   43.06
   2  -6  -9  423.91   65.35
  -2  -6   9  397.03   53.40
  -2  -6  -9  121.60   23.29
  -2  -6  -9  118.58   20.68
   2  -6   9  102.31   16.14
  -2  -6  -9   99.33   22.14
   2  -6   9   87.79   26.45
   2   6   9   94.57   23.99
   2  -6   9  109.16   20.16
  -5   3  11  253.08   45.50
  -5   3  11  220.72   33.08
   5  -3 -11  255.11   54.54
  -5  -3  11  268.40   64.71
  -5  -3  11  266.09   40.63
   5   3 -11  208.80   26.84
   4  -5  -9  981.19   10.92
   4  -5  -9 1022.34   56.03
  -4   5   9 1144.09   68.13
  -4  -5   9 1069.78   68.66
   4   5  -9  977.42   80.70
   4   5   9 1093.74   73.82
   4  -5   9  981.60   44.88
  -4  -5  -9 1114.43   83.40
  -4  -5  -9 1132.19   73.87
   4  -5   9 1182.29   79.88
  -4  -5  -9 1189.35   80.07
  -5  -3 -11   48.59   36.98
   5   3  11   58.54   22.63
  -5  -3 -11   62.67   21.37
   5  -3  11   42.42   11.71
  -5  -3 -11   49.44   16.21
  -3   2  15  970.00   92.23
  -3  -2  15  965.75   86.70
   3  -2 -15  883.09   88.42
   3   2 -15  954.99   92.34
  -3  -2  15  888.80   76.61
  -3   2  15  816.14   67.04
  -3   2  15  802.58   66.17
   3   2 -15  734.38   69.21
   5   0 -13  806.37   71.20
  -5   0  13  663.62   63.22
   5   0 -13  667.39   59.96
  -5   0  13  755.06   89.30
   0   0  17   -0.38    4.51
   0   0  17   16.58    8.22
   0   0  17   -7.05    8.57
   0   0 -17    9.80    8.30
   4   6  -5 3073.52  171.25
   4  -6  -5 3175.90  184.70
  -4  -6   5 3347.77  196.67
  -4   6   5 3218.39  176.60
   4  -6  -5 3111.08  171.07
   4  -6  -5 2983.75  164.51
  -4  -6   5 2967.09  162.65
  -4   6   5 3014.19  164.36
  -3  -2 -15  550.31   58.38
   3  -2  15  522.23   51.34
  -3  -2 -15  606.66   68.96
  -3  -2 -15  598.41   59.99
   3   2  15  674.61   82.96
  -3   2 -15  448.66   59.42
  -4  -6  -5 1235.22   97.64
   4  -6   5 1162.35   79.29
   4   6   5 1315.54   88.19
  -4  -6  -5 1207.15   76.56
   4  -6   5 1344.65   81.71
   5   0  13  699.18   70.35
  -5   0 -13  660.05   62.67
  -5   0 -13  711.17   73.97
  -5   0 -13  655.65   70.55
  -7   1   7   58.90   10.03
  -7  -1   7   76.36   17.28
  -7  -1   7   49.74   12.00
  -7   1   7   67.00   11.01
   7  -1  -7   48.78   17.03
   7   1  -7   74.81   26.40
   7  -1  -7   57.23   18.64
   7  -1   7   10.09    6.81
   7   1   7    4.86    6.00
  -7   1  -7   28.65   19.63
  -7   1  -7   10.68   16.40
  -7  -1  -7   26.48   14.62
   7  -1   7    1.60    7.77
   7   1   7    4.84    6.64
  -7   1  -7   15.05    6.59
  -7  -1  -7   24.77   10.07
   2  -7  -4   25.35    9.39
  -2  -7   4   11.39   13.80
   2  -7  -4   21.52   12.87
  -2  -7   4    1.84    2.33
   2  -7   4   13.43    7.08
  -2  -7  -4   17.34   16.99
  -2  -7  -4   22.15    9.47
  -2  -7  -4   10.56    8.65
   2  -7   4   30.78   19.92
   0  -7  -6   15.67   13.04
   0  -7  -6    6.44    6.01
   0  -7   6   12.85    7.27
   0  -7  -6    2.89    5.65
   0   7  -6    6.68    4.08
   0  -7   6    4.36    3.42
   0  -7   6   -3.61    2.61
  -2   3  15  356.53   40.40
  -2  -3  15  374.00   66.99
   2   3 -15  333.80   43.91
   2  -3 -15  292.38   43.76
  -2   3  15  339.79   38.15
  -2   3  15  381.24   52.07
  -2  -3  15  385.73   51.05
  -2  -3 -15 1280.43   98.27
   2  -3  15 1249.62   72.77
   2   3  15 1452.83   97.93
  -2   3 -15 1350.78   88.94
  -2  -3 -15 1421.27   89.11
   2  -3  15 1361.85   88.92
  -7  -3   3  888.93   81.31
   7  -3  -3  741.63   61.54
   7   3  -3  789.79   71.68
   7  -3  -3  891.79   79.99
  -7   3   3  779.02   71.41
  -7  -3  -3  779.72   80.47
  -7   3  -3  705.01   74.56
   7  -3   3  750.00   79.81
  -7  -3  -3  782.50   67.44
   7   3   3  765.26   72.32
   7  -3   3  696.37   62.41
  -1   6  10 1379.92   85.21
   1  -6 -10 1428.68   81.65
  -1  -6  10 1605.83  115.21
  -1  -6  10 1542.93   96.35
   1  -6 -10 1456.44  111.81
   1  -6  10 3123.17  170.02
  -1  -6 -10 3447.08  195.93
   1  -6  10 3449.34  199.49
   1  -6  10 3337.33  194.97
  -1  -6 -10 3311.22  195.08
  -1  -6 -10 3177.31  181.46
   6  -4  -6   54.19   10.61
   6  -4  -6   68.16   12.28
   6   4  -6   74.32   15.41
  -6   4   6   40.85   11.27
   6  -4  -6   34.02   13.27
  -6  -4   6  104.89   24.80
  -7   2   6  161.57   30.79
  -7  -2   6  155.59   22.61
   7  -2  -6  228.26   45.71
  -7   2   6  155.86   16.20
   7   2  -6  214.87   42.71
   7  -2  -6  126.80   19.88
   7  -2  -6  152.71   16.05
  -7  -2   6  157.89   51.09
  -6  -4  -6  790.45   95.64
   6   4   6  759.83   82.48
   6  -4   6  690.72   65.25
  -6   4  -6  747.08   67.57
  -6  -4  -6  840.57   74.27
   6  -4   6  818.30   75.46
  -4  -3  13    9.33   14.63
  -4  -3  13   28.83   13.37
   4  -3 -13   -1.38    7.41
   4   3 -13    9.48    6.88
  -4   3  13   12.36    3.06
  -4   3  13   28.13   14.62
   7   2   6   90.07   12.38
   7   2   6   94.57   28.30
  -7  -2  -6  132.91   27.97
   7  -2   6   87.19   16.92
  -7  -2  -6  117.98   21.77
  -7   2  -6  120.95   33.76
   7  -2   6   85.00   15.34
  -7   2  -6  144.68   35.89
  -4  -3 -13  126.01   25.17
  -4  -3 -13   97.78   16.21
   4   3  13   61.06   20.59
  -4  -3 -13   63.85   22.69
  -4  -3 -13   74.58   34.69
   4  -3  13  111.23   39.11
   2  -5 -12   23.83    5.65
  -2  -5  12   25.05   14.67
   2  -5 -12   33.49   11.77
  -2  -5  12   20.62   12.41
   2  -5  12   77.14   14.52
   2   5  12  105.08   18.61
  -2  -5 -12  164.47   38.02
   2  -5  12   73.43   28.94
  -2   5 -12   43.36    8.79
  -2  -5 -12   85.97   20.57
   2  -5  12   94.69   21.00
  -2  -5 -12   51.68   16.62
  -4   2  14 1797.50  107.62
  -4  -2  14 1844.14  106.85
   4   2 -14 1689.09   96.32
   4  -2 -14 1760.20  113.05
  -4  -2  14 1989.17  118.78
  -6  -2  10   -1.09    6.75
  -6   2  10    8.20    5.79
   6   2 -10    6.03    6.73
   6  -2 -10    5.17    2.64
  -6   2  10    0.46    5.35
  -6   2  10    3.63    5.47
   6  -2 -10    9.69    4.52
  -1   0  17  794.73   77.10
  -1   0  17  797.59   74.68
   1   0 -17  989.89   49.63
  -6   0  11    0.71    4.43
   6   0 -11   15.28   13.25
   6   0 -11    3.17    5.24
  -6   0  11    1.80    4.61
  -6   0  11   13.11    6.23
   1   0  17   11.46   12.95
  -1   0 -17   79.28   21.25
  -4  -2 -14   14.35    8.85
  -4   2 -14    9.21    5.11
  -4  -2 -14   18.46    9.02
   4  -2  14   11.03    6.24
   4   2  14   13.64   11.75
  -4  -2 -14   22.95    9.55
  -6   2 -10  249.12   41.80
  -6  -2 -10  283.98   37.28
  -6   2 -10  243.23   35.38
  -6  -2 -10  273.73   37.45
   6  -2  10  326.88   55.18
   6   2  10  328.58   74.36
  -6  -2 -10  335.92   82.67
  -6   2 -10  290.02   55.28
  -6  -2 -10  261.76   34.63
   6  -2  10  217.97   41.94
   5   1 -13 2543.62  146.46
   5  -1 -13 3135.21  175.31
  -5  -1  13 2895.18  161.65
   5   1 -13 2977.44  169.20
   5  -1 -13 2639.91  144.42
  -5   1  13 2845.24  157.18
  -5   1  13 2827.45  166.46
  -5  -1  13 2938.60  166.78
   0   1  17   -3.27    5.92
   0  -1  17    9.29    6.46
   0   1  17    0.62    3.21
   0   1  17   14.33    8.65
   0  -1  17    8.79   10.73
   0  -1  17  -11.41   12.91
   0  -1 -17    4.64   16.18
   0   1 -17   -8.01   12.87
  -3   5  11   30.07   12.88
   3  -5 -11   59.23   35.97
  -3  -5  11   29.78   17.99
  -3  -5  11   40.15   35.91
   6   0  11    6.23    5.38
  -6   0 -11    5.89    5.92
  -6   0 -11   17.08   16.48
  -6   0 -11   15.74   14.78
   3  -5  11  205.86   44.65
  -3   5 -11  162.48   28.56
   3  -5  11  169.23   31.00
   3   5  11  143.99   40.74
  -3  -5 -11  211.51   49.99
  -3  -5 -11  205.61   50.42
   3  -5  11  126.49   19.99
  -3  -5 -11  163.89   48.27
  -3  -6   8 1010.84   36.19
   3  -6  -8 1101.31   69.97
   3  -6  -8  903.16   78.52
   3  -6  -8  959.66   82.44
  -3   6   8 1023.06   63.42
  -3   6   8  855.47   80.86
   3  -6   8  574.76   58.69
   3  -6   8  588.38   53.35
  -3  -6  -8  690.02   83.84
   3   6   8  677.71   86.62
  -3  -6  -8  611.73   63.39
   3  -6   8  589.91   55.00
  -3  -6  -8  652.69   97.53
   3  -6   8  606.53   57.33
   5   1  13 1981.68  121.78
   5  -1  13 2096.40  122.89
  -5  -1 -13 1994.64  117.02
  -5   1 -13 2050.48  129.02
  -5  -1 -13 2149.13  126.72
  -5   1 -13 2099.45  125.40
  -5  -1 -13 1954.75  128.91
  -5   1 -13 1885.37  114.66
   3  -4 -13   21.60   12.59
  -3   4  13    6.25    8.52
  -3  -4  13   42.56   14.79
   3   4 -13    1.09    1.91
   3   4 -13   14.71    5.34
   3   4  13   79.98   17.19
  -3  -4 -13  104.35   11.86
  -3  -4 -13  119.00   34.50
  -3  -4 -13  112.38   22.25
  -3  -4 -13   99.11   29.71
   3  -4  13  102.78   27.22
   1   7  -6  336.37   63.86
  -1  -7   6  361.15   42.41
  -1  -7   6  359.53   42.97
   1  -7  -6  416.86   65.71
  -1  -7   6  543.78   71.43
   1  -7  -6  523.98   53.64
  -1   7   6  345.09   46.24
  -1  -7  -6  197.21   45.84
  -1   7  -6  126.59   19.58
  -1  -7  -6  139.98   20.62
   1  -7   6  123.79   22.03
   1  -7   6  188.14   55.26
  -1  -7  -6  171.86   31.72
  -2   2  16 1282.97   71.12
  -2   2  16 1395.68   94.14
  -2   2  16 1257.01   71.37
  -2   2  16 1422.64   82.69
  -2  -2  16 1250.40   88.78
  -2  -2  16 1438.22   92.75
   2   2 -16 1203.77   80.71
   2   2 -16 1501.68   90.71
   2  -2 -16 1272.26   77.39
   2   2  16   31.24    8.80
   2  -2  16   21.72   12.18
  -2   2 -16    4.54    8.25
  -2  -2 -16   23.21   13.98
  -3  -7   0   30.99   11.40
   3   7   0   14.19    9.47
  -3  -7   0   15.32   10.78
   3  -7   0    8.04    8.03
   7  -3  -4  459.43   55.28
   7  -3  -4  444.01   56.42
   7  -3  -4  639.92   61.56
  -7  -3   4  597.13   71.69
   7   3  -4  472.50   62.39
  -7   3   4  519.89   58.99
  -2  -4  14    6.22    6.60
   2  -4 -14   23.83   23.37
   2   4 -14    6.88    4.53
  -2  -4  14   18.86   22.40
  -2   4  14   15.94   18.46
   7  -3   4  583.40   70.54
   7   3   4  611.59   75.37
  -7  -3  -4  568.80   52.74
   7  -3   4  437.13   50.36
  -7  -3  -4  531.94   51.01
  -7   3  -4  496.01   60.84
  -2  -4 -14   99.45   15.29
   2  -4  14   29.87   24.18
  -2   4 -14   79.15   11.46
   2   4  14  136.36   24.94
   2  -4  14   94.90   14.25
  -2  -4 -14  107.18   41.40
   2  -4  14   75.91   21.13
  -2  -4 -14  106.08   25.41
  -2  -4 -14   79.16   42.26
  -1   1  17  781.01   78.91
  -1   1  17  773.92   80.58
  -1  -1  17  707.60   65.56
  -1  -1  17  681.87   60.08
  -1   1  17  714.94   65.32
   1   1 -17  773.36   81.05
   1  -1 -17  892.92   89.60
  -1   1  17  869.86   74.55
   0  -5  13 2842.01  175.72
   0  -5 -13 2635.41  142.61
   0  -5 -13 2712.54  158.52
   0   5  13 2697.94  153.15
   0  -5 -13 2733.09  150.93
   0  -5  13 2985.52  168.45
   0   5 -13 2544.00  138.32
   0  -5  13 2536.86  138.47
  -6   1  11   20.39    7.51
   6   1 -11   21.47   12.28
   6  -1 -11    0.45    5.68
  -6   1  11   15.60    4.75
  -6  -1  11   27.31   12.16
   6  -1 -11    5.70    4.56
  -6  -1  11   12.62    6.48
  -1   1 -17 3684.52  209.68
  -1  -1 -17 3847.14   76.50
   1  -1  17 3674.10  206.79
   1   1  17 3702.21  210.20
   1   1  17 3237.13  181.69
  -3   0  16   -1.21    5.74
  -3   0  16  -10.11   18.09
   3   0 -16    4.42   12.78
   2  -7  -5  799.47   71.23
   2  -7  -5  791.81   71.96
  -2  -7   5  652.65   79.41
  -2  -7   5  717.95   61.33
   5  -5  -7   99.23   12.30
   5  -5  -7   80.20   13.84
   5   5  -7   88.96   15.51
  -5   5   7   70.79   20.87
   5  -5  -7   59.42    9.67
  -5  -5   7   75.58   15.97
   3  -7  -1   86.99   24.57
  -3  -7   1   55.36   12.38
  -3  -7   1   15.06   33.61
  -2  -7  -5   36.29   23.15
  -2  -7  -5   19.61    9.24
  -2  -7  -5   11.93    7.17
   2  -7   5   18.71    5.26
   2  -7   5   13.93    8.06
  -3  -7  -1  179.70   44.67
   3  -7   1  196.46   54.06
  -3  -7  -1  149.79   30.93
  -3  -7  -1  207.05   38.26
   3   7   1  161.50   19.06
  -5  -5  -7   15.16   13.76
   5  -5   7   14.68   14.87
  -5  -5  -7   20.79   16.69
   5   5   7    4.41   10.19
  -7   0   8    8.06    5.31
   7   0  -8    3.19    8.17
  -7   0   8    6.41    5.75
  -3   0 -16   -2.08    8.07
   3   0  16   20.88   11.93
  -6  -1 -11  204.85   29.23
  -6  -1 -11  234.39   45.22
  -6  -1 -11  145.76   30.12
  -6   1 -11  158.36   36.11
  -6   1 -11  162.71   29.87
   6  -1  11  199.36   45.67
   6   1  11  148.43   52.91
  -6   1 -11  129.67   26.58
  -7   0  -8   19.50    9.15
   7   0   8   18.94    6.89
   7   0   8    5.26    4.55
  -7   0  -8    1.36   10.85
  -7   0  -8   -6.27    4.22
  -4  -6   6   40.27   12.08
   4   6  -6   31.41    7.40
   4  -6  -6   46.59   11.81
   4  -6  -6   68.65   12.53
  -4   6   6   53.90   11.16
   4  -6  -6   46.13   11.53
  -4   6   6   41.54   12.10
  -4  -6   6  101.03   28.56
   4   6   6   -3.07   15.22
   4  -6   6   20.03    9.18
   4  -6   6    0.67    1.09
  -4  -6  -6    7.06    8.64
  -4  -6  -6    9.20   12.62
   4  -6   6   -6.80   16.19
   6  -3  -9  618.43   54.38
   6   3  -9  726.30   68.79
  -6   3   9  647.15   60.03
  -6   3   9  627.17   54.28
  -6  -3   9  741.21   84.26
  -6   3   9  616.67   60.43
   6  -3  -9  638.73   69.74
  -6   3  -9  240.02   44.69
  -6  -3  -9  179.69   27.19
  -6   3  -9  332.80   69.71
  -6  -3  -9  259.65   53.31
   6   3   9  191.50   43.26
   6  -3   9  183.09   51.53
   6  -3   9  135.72   25.63
  -6  -3  -9  237.73   60.84
  -4   0  15   11.92    5.47
   4   0 -15    5.81   11.42
  -4   0  15    7.05    4.80
  -4   0 -15    7.17   13.38
   4   0  15    5.30    8.85
  -4   0 -15    3.86   10.01
  -3  -7   2 1541.27  104.75
   3  -7  -2 1522.78   98.48
  -3  -7   2 1380.98   85.13
   3  -7  -2 1541.81   99.15
   3  -7   2  623.22   61.68
  -3  -7  -2  689.70   83.28
  -3  -7  -2  638.70   66.57
   3  -7   2  724.76   73.96
   3   7   2  644.04   77.02
   0   3 -16  935.83   81.65
   0  -3  16 1083.79   71.72
   0   3  16  944.47   85.66
   0  -3  16 1137.09   84.19
   0  -3 -16 1072.24   69.76
   0  -3  16 1049.80   87.00
  -6  -5   0  496.20   50.08
   6  -5   0  348.55   43.19
   6  -5   0  445.58   56.00
   6  -5   0  419.15   62.44
  -6  -5   0  396.69   52.18
   6   5   0  468.94   60.49
  -5  -4  10   91.19   19.23
   5   4 -10   34.58   12.29
  -5   4  10   57.99   15.93
  -5   4  10   37.34   10.60
   5  -4 -10   48.10   12.68
   5   4  10  325.92   76.55
   5  -4  10  292.51   40.59
  -5  -4 -10  358.07   51.35
  -5  -4 -10  430.55   74.07
  -5  -4 -10  390.72   83.17
   1  -5 -13  129.82   28.55
  -1  -5  13  206.19   54.44
   1  -5 -13  163.82   18.98
  -1   5  13  113.17   16.16
  -1  -5  13  149.30   44.26
   0  -7   7  806.41   73.71
   0  -7   7 1097.93  108.21
   0  -7  -7  972.75   91.97
   0   7  -7  885.30   79.14
   0  -7  -7  890.36   78.00
   0  -7  -7 1016.85   41.75
   0  -7   7  899.64   74.73
   1   5  13   32.41    8.21
  -1  -5 -13   61.46   19.24
   1   5  13  -12.67   27.03
   1  -5  13   28.23   18.79
   1  -5  13    4.36   12.97
  -1   5 -13    6.39    5.92
   1  -5  13   15.71    6.72
  -1  -5 -13   28.00   12.83
  -1  -5 -13   32.07    8.34
  -4   4  12  113.67   30.62
   4  -4 -12  126.94   28.66
  -4  -4  12  182.92   47.51
   4   4 -12  105.11    9.03
   4   4 -12   94.38   16.66
  -4  -4  12  124.07   43.45
   6  -5  -1 2575.88  144.69
   6  -5  -1 2830.54  157.48
  -6  -5   1 3049.47  170.25
  -6  -5   1 3088.37  177.37
   6   5  -1 2804.96  158.71
   6  -5  -1 2787.52  168.51
  -6   5  -1  931.92   79.50
   6  -5   1  922.90   85.97
   6  -5   1  759.06   68.10
   6   5   1  969.97   90.11
  -6  -5  -1 1000.56   42.17
  -6  -5  -1  995.37   68.15
   6  -5   1  999.23   64.42
  -3   1  16  524.08   47.70
   3  -1 -16  445.21   71.48
   3   1 -16  472.63   67.62
  -3  -1  16  465.97   60.36
  -3  -1  16  546.57   60.55
  -3   1  16  416.29   57.99
   4   4  12   10.85   11.68
  -4  -4 -12    9.18    5.38
   4  -4  12   33.67   12.88
  -4  -4 -12   12.01   11.65
  -4  -4 -12    7.09    9.75
  -7   1   8  738.11   65.72
   7  -1  -8  612.59   60.40
  -7  -1   8  759.24   70.28
   7  -1  -8  703.58   63.23
  -7   1   8  707.01   62.63
  -7  -1   8  682.32   63.38
   7   1  -8  726.02   86.19
   7  -1  -8  753.26   67.46
   3  -1  16   41.71   32.30
   3   1  16   64.77   48.61
  -3  -1 -16   84.18   24.94
  -3   1 -16  119.57   25.78
   7   1   8  671.55   76.08
   7  -1   8  615.34   56.18
  -7  -1  -8  722.72   79.01
  -7  -1  -8  681.45   62.01
  -7   1  -8  627.43   66.82
  -7  -1  -8  792.11   80.10
  -7  -1  -8  545.70   62.54
   7  -1   8  642.06   71.98
  -7   1  -8  679.34   62.88
   7   1   8  588.43   55.47
  -7   1  -8  638.19   55.62
   6  -4  -7  107.48   23.66
   6  -4  -7   83.11   21.29
  -6  -4   7  111.08   28.09
  -6   4   7  134.61   19.60
   6  -4  -7  101.62   17.00
   6   4  -7  187.72   33.98
   7  -2  -7 1028.19   59.79
   7  -2  -7  876.30   75.59
  -7  -2   7 1046.04   63.16
   7   2  -7 1049.62   66.28
  -7  -2   7 1096.32   68.14
  -7   2   7  953.29   81.50
  -7   2   7 1055.78   60.71
   7  -2  -7 1031.26   88.77
  -6  -4  -7  972.85   86.21
  -6   4  -7  839.65   73.93
   6  -4   7  881.29   78.71
  -6  -4  -7  995.12   35.68
   6  -4   7  864.45   80.19
   6   4   7 1042.16   71.24
  -7   2  -7  980.96   36.33
   7  -2   7  888.10   75.62
   7   2   7  835.93   75.38
  -7  -2  -7  943.25   83.00
  -7  -2  -7 1008.47   69.69
   7   2   7  897.03   97.75
   7  -2   7 1033.64   71.73
  -7   2  -7  971.82   86.27
  -2  -6  10    2.06   13.87
   2  -6 -10    1.77    1.06
   2  -6 -10    6.19    2.53
   2  -6 -10   22.11   12.35
   2  -6  10  527.79   62.05
   2  -6  10  484.69   22.53
  -2  -6 -10  484.74   28.99
   2  -6  10  433.37   51.06
   2   6  10  453.99   60.94
  -2  -6 -10  517.67   57.57
  -2  -6 -10  560.19   72.16
  -4   5  10   21.22    8.61
  -4  -5  10   20.77   10.50
   4   5 -10    6.01    1.64
   4   5 -10    8.97    2.13
   4  -5 -10   29.96   11.69
   4   1 -15   -2.73   13.00
  -4  -1  15    7.97    4.26
  -4  -1  15   22.58    8.94
  -4   1  15   24.63   10.31
   4  -1 -15   -2.15    7.05
  -4   1  15    4.44    4.40
   6  -5  -2    3.40    5.41
   6  -5  -2    8.03    6.03
  -6  -5   2   20.20    9.67
   6  -5  -2   19.42   12.58
   6   5  -2   18.40    6.48
  -6  -5   2    4.69    3.45
   4  -5  10    9.57    7.59
  -4  -5 -10   17.89   14.14
   4   5  10    9.77   10.31
   4  -5  10  -10.53    5.69
  -4  -5 -10    9.60    6.48
  -4  -5 -10   12.03    8.00
   4  -5  10    0.87    9.54
  -3   7   3   10.90    2.18
   3  -7  -3   10.54    5.14
  -3  -7   3   14.21   13.78
  -3  -7   3   15.51    6.55
   3  -7  -3    6.69   11.96
  -6   5  -2   29.47    8.35
   6  -5   2   30.54    7.42
  -6  -5  -2   63.59   12.73
   6  -5   2   59.44   16.14
   6   5   2   56.21   13.58
  -6  -5  -2   34.41   12.95
   3   7   3   -3.42   10.51
   3  -7   3    2.18    6.61
  -3  -7  -3   11.70    9.12
   3  -7   3   15.10   11.95
   7  -3  -5  265.84   53.13
   7   3  -5  226.41   44.51
  -7  -3   5  290.08   41.14
  -7   3   5  303.52   65.16
   7  -3  -5  228.92   35.47
  -7  -3   5  197.49   39.53
   7  -3  -5  248.55   38.34
  -4   1 -15   99.48   24.33
  -4  -1 -15   88.44   27.15
  -4  -1 -15   75.69   24.94
   4   1  15   28.89   26.47
   4  -1  15   51.88   16.81
  -4  -1 -15   60.09   12.93
  -5  -6   0 2993.17  171.07
  -5  -6   0 2973.70  167.43
   5  -6   0 2984.09  175.45
   5  -6   0 2946.17  188.30
   5  -6   0 2731.99  154.20
   5   6   0 2908.33  163.39
  -7  -3  -5   11.43    5.85
   7  -3   5    1.25    1.87
  -7   3  -5   17.99   13.14
  -7   3  -5   21.47   10.82
   7  -3   5    9.71    5.77
   7   3   5   10.55    8.89
  -7  -3  -5    8.40    8.46
   1   3 -16  574.66   55.96
  -1  -3  16  813.48   82.04
  -1  -3  16  591.68   73.61
  -1   3  16  702.22   60.66
   1  -3 -16  612.09   77.11
   1   3  16   52.59   12.92
   1   3  16   35.15   10.00
  -1  -3 -16   50.77   24.82
   1  -3  16   35.57    8.11
  -1   3 -16   41.62    8.39
   1  -3  16   81.14   18.90
  -1   3 -16   58.46   24.23
   1  -3  16   44.08   21.76
  -8   0   0 3342.69  194.83
   8   0   0 3220.26  190.69
   2   0 -17    7.54   10.43
  -2   0  17   19.25   15.43
  -2   0  17    6.87    5.29
   0   4 -15  929.22   81.20
   0  -4  15 1060.39   69.20
   0   4  15 1001.61   35.18
   0  -4  15  970.27   82.33
   0  -4  15 1073.51   80.01
   0  -4 -15  905.35   79.80
   0  -6  11 1617.96   96.57
   0  -6  11 1840.97  119.65
   0   6  11 1500.47   87.00
   0  -6  11 1395.98   75.59
   0  -6 -11 1924.22  112.83
   0  -6 -11 1604.11   99.11
  -2   0 -17   36.29   25.86
   2   0  17    9.99    6.11
   5  -6  -1    6.42    8.31
  -5  -6   1    4.11    3.83
   5  -6  -1   37.60   17.15
   5  -6  -1    3.03    4.67
   5   6  -1   21.95   14.68
  -5  -6   1    5.18   10.44
   5   6   1  128.63   24.25
  -5  -6  -1  164.93   42.29
  -5  -6  -1  164.19   48.01
   5  -6   1  179.45   57.84
   1  -7  -7   64.99   18.02
   1  -7  -7   37.51   18.38
  -1  -7   7   27.99    6.07
  -1  -7   7   31.77    6.44
  -1  -7   7   41.88   18.79
  -1   7   7   28.72   10.63
   8   0  -1   14.86   20.62
  -8   0   1   34.38   16.05
  -1  -7  -7   10.58    8.47
  -1  -7  -7    4.57    5.51
   1  -7   7    9.96    4.69
   1  -7   7   16.48   11.18
  -1  -7  -7    8.95    8.24
   8   0   1   15.10   15.65
  -8   0  -1    0.42    9.80
  -5  -2  13 1059.55   67.28
  -5   2  13  987.40   18.47
   5  -2 -13 1209.95   76.21
  -5   2  13 1174.77   91.00
  -5  -2  13  866.33   80.00
   0  -2  17  360.17   46.16
   0  -2 -17  378.60   50.19
   0   2  17  291.06   51.23
   0  -2  17  358.86   48.10
   0  -2  17  349.92   68.16
   0   2 -17  347.01   46.09
   2  -7  -6  110.65   17.53
  -2  -7   6  184.45   61.85
  -2  -7   6  136.16    9.16
   2  -7  -6  153.79   43.62
   2  -7   6    7.95    9.28
  -2  -7  -6    7.37    6.51
  -2  -7  -6   13.59    9.42
  -2  -7  -6   20.72   10.76
   2  -7   6    0.05    4.94
  -5  -2 -13  518.97   57.96
  -5   2 -13  461.42   71.44
  -5  -2 -13  554.88   60.14
   5  -2  13  573.79   58.03
   5   2  13  545.93   65.02
  -5  -2 -13  537.08   59.35
  -5   2 -13  561.21   65.95
  -5  -2 -13  518.11   70.60
   5   3 -12  115.63   20.28
  -5  -3  12  171.28   37.42
   5  -3 -12  103.59   33.83
  -5  -3  12  207.96   50.58
  -5   3  12  120.55   34.47
  -5  -3 -12  439.24   88.76
  -5  -3 -12  465.37   80.80
  -5  -3 -12  413.25   54.63
   5  -3  12  417.10   57.96
   5   3  12  342.35   45.06
  -5  -3 -12  422.55   64.51
  -5  -6   2    4.96    6.11
   5  -6  -2   27.99   10.99
  -5  -6   2    6.81    6.23
   5  -6  -2    6.27    6.34
   5   6  -2    5.18    6.27
  -3   6   9   20.25    7.80
   3  -6  -9   36.22    9.41
  -3  -6   9    1.35   14.41
  -3   6   9   36.04   10.48
   3  -6  -9   25.02   22.16
  -5  -6  -2 2321.41  137.23
   5  -6   2 2286.91  147.51
  -5  -6  -2 2138.65  122.35
   5   6   2 2212.74  129.35
   3  -6   9  128.19   19.90
   3  -6   9   90.39   22.60
  -3  -6  -9   83.43   22.81
  -3  -6  -9   83.21   18.62
   3  -6   9  113.72   28.48
   3  -6   9   69.44   11.06
   3   6   9  106.73   24.68
  -3  -6  -9   96.87   28.21
  -8   0   2 1646.53   96.61
   8   0  -2 1478.44   99.49
   8   0   2  723.45   67.73
  -8   0  -2  849.41   75.97
  -6  -5   3  944.60   81.72
   6  -5  -3 1073.55   65.58
   6  -5  -3  962.49   86.32
  -6  -5   3 1278.42   78.97
   6   5  -3 1192.19   76.72
   6  -5  -3 1343.35   88.62
   6  -5   3  217.08   27.83
   6   5   3  270.39   43.87
   6  -5   3  316.56   60.46
  -6   5  -3  260.48   34.30
  -6  -5  -3  255.47   42.03
  -6  -5  -3  253.96   49.37
  -8  -1   0  593.94   49.14
  -8   1   0  703.08   67.73
  -8  -1   0  629.26   52.84
   8  -1   0  727.65   77.48
   8   1   0  744.45   85.45
  -8  -1   0  674.92   74.60
  -1   4  15   73.20    9.94
   1  -4 -15   99.03   26.59
  -1  -4  15  112.25   26.84
  -1  -4  15   72.45   46.70
   1   4 -15   67.80   10.98
  -1  -6  11   33.40   10.41
   1  -6 -11   13.53   10.92
   1  -6 -11   15.83    5.59
  -1  -6  11    9.88   13.95
  -1   6  11    1.40    3.47
  -1  -4 -15  116.77   20.11
   1  -4  15  104.67   22.93
  -1   4 -15  120.90   16.69
  -1  -4 -15  102.79   17.06
   1  -4  15  121.80   22.91
   1   4  15  189.92   37.03
   1   4  15   95.75   23.32
   1  -4  15   76.27   26.64
  -4   6   7 1533.68   94.14
   4  -6  -7 1672.66  100.06
   4  -6  -7 1558.71   92.89
  -4  -6   7 1666.91  101.66
  -4   6   7 1418.66   85.26
   4   6  -7 1417.02   79.82
  -1  -6 -11    9.45   10.02
  -1  -6 -11    9.10    8.79
   1  -6  11   10.74    7.71
   1   6  11    4.85    4.36
  -1  -6 -11    5.97    6.08
   1  -6  11    0.92    1.29
   1  -6  11   -4.05   14.96
   2  -1 -17  404.27   49.75
  -2   1  17  365.41   44.57
  -2  -1  17  425.12   60.57
  -2  -1  17  445.74   53.79
  -2   1  17  356.87   86.98
   2   1 -17  357.52   55.08
   4  -6   7 1786.08   97.87
  -4  -6  -7 2002.29  118.95
  -4  -6  -7 2223.98  130.21
  -4  -6  -7 2158.41  127.57
   4  -6   7 2176.77  131.50
   4   6   7 1986.18  126.00
   4  -6   7 2090.35  137.02
  -2   1 -17   39.78   11.25
  -2  -1 -17   22.56   15.30
   2  -1  17   81.37   19.58
   2   1  17   59.81   23.53
   8  -1  -1  358.38   52.26
  -8  -1   1  293.81   33.73
   8   1  -1  389.98   50.28
  -8   1   1  313.23   59.27
  -8  -1   1  315.21   85.72
  -8  -1   1  327.06   37.39
   8   1   1  128.94   30.13
  -8  -1  -1   94.03   11.72
  -8   1  -1  107.85   28.00
   8  -1   1  129.62   38.82
  -8  -1  -1  148.49   32.16
   5  -5  -8  833.59   71.97
   5  -5  -8  772.80   65.04
  -5  -5   8  926.98   89.36
   5  -5  -8  866.21   95.83
  -5   5   8  849.40   88.73
   5   5  -8  732.44   65.78
  -3   7   4 1878.17  103.70
   3  -7  -4 1764.45  103.79
  -3  -7   4 2037.80  120.34
   3  -7  -4 1924.32  123.18
   3  -7  -4 1941.23  116.26
  -3  -7   4 1826.10  106.06
  -3  -7  -4 1307.12   85.58
   3   7   4 1284.34   82.49
   3  -7   4 1181.02   82.68
  -3  -7  -4 1352.17   81.77
   3  -7   4 1220.41   79.31
  -5  -5  -8    7.10    9.86
   5  -5   8   -2.20    7.32
  -5  -5  -8   15.15   14.10
  -5  -5  -8    6.98   16.93
   5   5   8   17.50   10.78
   1   2 -17 1304.39   80.60
  -1  -2  17 1276.85   76.48
  -1  -2  17 1211.28   94.46
  -1   2  17 1105.02   66.50
   1  -2 -17 1306.89   82.83
  -1   2  17 1187.21   85.23
   6  -2 -11  296.72   51.51
   6  -2 -11  214.92   33.37
  -6   2  11  258.09   36.22
  -6  -2  11  244.82   45.82
  -6   2  11  207.36   31.84
  -6   2  11  189.61   35.11
   6   2 -11  298.60   36.63
   1  -2  17    6.72   16.27
   1  -2  17   30.19   15.33
   1   2  17   31.20   11.07
  -1  -2 -17    6.88   12.41
  -1   2 -17   25.95   14.93
   3  -3 -15  327.65   69.34
  -3  -3  15  334.09   46.83
   3   3 -15  205.65   46.20
  -3  -3  15  323.51   77.96
  -3   3  15  356.88   83.66
  -6   2 -11   89.44   17.45
  -6   2 -11  113.58   25.78
  -6  -2 -11   83.71   21.49
  -6   2 -11   77.92   15.05
   6   2  11   88.62   16.51
  -6  -2 -11  113.43   16.71
  -6  -2 -11   74.39   21.08
  -6  -2 -11   57.84   25.11
   6  -2  11   97.35   28.21
  -3   3 -15  207.04   58.81
  -3  -3 -15  177.57   38.11
  -3  -3 -15  233.11   54.56
   3   3  15  121.96   24.52
   3  -3  15  167.96   20.98
  -3  -3 -15  174.01   24.66
  -5   0  14   12.25   11.45
  -5   0  14    3.92    3.48
   5   0 -14    3.37    4.43
   5   0 -14   -9.78   16.75
  -7   0   9  116.52   12.03
   7   0  -9   95.64   31.14
  -7   0   9  104.22   16.74
  -5  -6   3   10.63    4.98
  -5  -6   3   24.72   13.59
  -5   6   3    1.66    1.20
   5  -6  -3    7.26    2.74
   5  -6  -3    6.90    9.86
   5   6  -3   11.43    9.45
  -5   0 -14   11.35   15.21
  -5   0 -14   11.54    5.71
  -5   0 -14    6.54    5.73
   5   0  14   -0.97    9.88
  -5  -6  -3   51.44   23.65
   5   6   3   85.05   22.82
  -5  -6  -3   68.10   17.79
   5  -6   3   86.39   20.40
   8   0  -3   15.19   10.82
  -8   0   3   12.81    7.51
  -8   0  -3   27.13    8.94
   8   0   3    8.50   10.36
  -7   0  -9   26.94   14.95
   7   0   9   25.13   12.78
  -7   0  -9   27.21   28.03
   7   0   9    3.06   11.50
  -7   0  -9   15.29   10.32
  -6   0  12 1588.23   94.76
   6   0 -12 1509.07   92.20
  -6   0  12 1562.83   93.11
   6   0 -12 1342.92   78.42
  -8  -1   2 2324.35  133.71
   8   1  -2 2379.58  136.21
  -8   1   2 2362.12  136.95
   8  -1  -2 2392.81  136.69
  -8  -1   2 2147.67  115.95
  -8  -1  -2  536.45   47.10
  -8  -1  -2  598.62   64.22
  -8   1  -2  480.96   63.11
   8   1   2  433.34   58.71
  -8   1  -2  620.19   87.09
   8  -1   2  569.66   55.11
  -3  -5  12  186.63   38.34
   3  -5 -12  144.89   36.08
  -3   5  12  155.80   26.63
  -3  -5  12  223.36   45.93
   6   0  12 1750.35  111.32
  -6   0 -12 1846.02  134.81
  -6   0 -12 1755.70  110.18
  -6   0 -12 1696.01  103.76
   3   5  12   13.13    7.53
  -3  -5 -12   12.37   11.99
  -3  -5 -12    6.07    5.29
   3  -5  12   20.12    7.62
  -3   5 -12    6.61    4.43
   3  -5  12    5.67    5.03
  -3  -5 -12   11.14   10.35
  -2  -5  13  355.80   86.69
  -2  -5  13  308.95   67.86
   2  -5 -13  276.73   40.74
   7  -3  -6 1629.79   90.03
   7   3  -6 1571.54   93.38
   7  -3  -6 1619.01   98.62
  -7   3   6 1662.09   98.01
  -7  -3   6 1644.47  100.24
  -7  -3   6 1476.38   87.59
  -2  -5 -13 1230.23   76.68
  -2  -5 -13 1127.53   79.95
   2  -5  13 1320.91  102.47
   2   5  13 1106.99   84.68
  -2   5 -13  976.89   86.86
   2  -5  13 1061.28   73.34
  -2  -5 -13 1113.83   66.64
   2  -5  13 1033.63   73.73
  -7  -3  -6  337.29   66.08
   7   3   6  451.43   78.50
   7  -3   6  282.57   54.15
  -7   3  -6  328.30   65.68
  -7   3  -6  335.19   45.09
   7  -3   6  317.08   48.05
  -7  -3  -6  334.58   48.64
   7  -4   0   54.89    9.71
  -7   4   0   17.28   16.48
   7  -4   0   44.40   15.78
   7  -4   0   27.22    9.98
   7   4   0   44.97   14.59
  -7  -4   0   92.64   23.46
  -7  -4   0   78.38   20.32
   0  -7  -8  175.45   32.41
   0  -7  -8  176.08   22.14
   0  -7   8  193.48   23.61
   0  -7   8  179.26   43.20
   0   7  -8  133.98   20.83
   0  -7  -8  161.31   19.75
   0  -7   8  163.79   10.18
   6  -5  -4  101.68   18.41
   6  -5  -4   88.73   17.72
   6   5  -4  146.75   25.78
   6  -5  -4   78.95   14.86
   6  -5  -4  124.96   31.39
  -6  -5   4  102.37   16.65
  -6  -5   4  122.15   33.82
   6   5   4    7.86   11.89
  -6   5  -4   10.42    6.39
  -6  -5  -4   38.90   31.66
   6  -5   4   -0.53   10.03
  -6  -5  -4   14.80   11.05
  -4   3  14    0.30    0.87
  -4   3  14   13.50   12.94
   4   3 -14    7.90    3.98
  -4  -3  14   13.16    8.21
   4  -3 -14    7.60    8.77
  -4  -3  14   35.88   12.06
  -6  -3  10 1060.26   65.53
  -6   3  10  906.47   82.81
  -6   3  10  917.59   81.62
   6  -3 -10  946.88   84.73
  -6   3  10  788.38   87.18
   6  -3 -10  871.43   74.71
   6   3 -10  981.68   61.00
  -7  -4   1  375.12   79.42
   7  -4  -1  273.55   51.92
  -7  -4   1  411.85   49.32
   7  -4  -1  341.62   48.33
  -7   4   1  473.46   71.70
   7  -4  -1  360.84   59.61
   7   4  -1  342.40   56.07
   7  -4   1  141.58   13.75
   7  -4   1  123.10   18.47
  -7   4  -1  176.41   46.46
   7   4   1  176.00   44.98
  -7  -4  -1  210.36   56.91
  -7  -4  -1  196.99   39.09
   7  -4   1  178.83   28.46
   7  -4   1  183.46   44.18
  -3   2  16   15.96    4.68
  -3   2  16   37.85   24.90
   3  -2 -16   23.51   17.63
  -3  -2  16   15.98    6.38
   3   2 -16   15.69    5.75
  -3  -2  16   22.33   13.85
  -3   2  16   -0.12    2.11
   3   2 -16   25.52   19.83
  -4  -3 -14  394.10   93.34
  -4  -3 -14  438.96   58.73
   4   3  14  272.73   71.67
  -4  -3 -14  313.47   42.17
   4  -3  14  328.61   45.28
  -4  -3 -14  341.01   53.21
  -6   3 -10  655.58   63.97
  -6  -3 -10  656.65   59.23
  -6  -3 -10  816.83   74.39
   6  -3  10  664.40   70.23
   6   3  10  754.87   73.69
  -6  -3 -10  673.60   69.03
  -6   4   8  234.79   33.19
  -6   4   8  167.97   25.05
  -6   4   8  204.90   32.67
   6   4  -8  202.80   32.56
  -6  -4   8  210.32   54.60
   6  -4  -8  188.08   27.11
   6  -4  -8  256.18   48.92
   7   2  -8  373.33   51.84
  -7  -2   8  382.62   46.40
   7  -2  -8  410.03   51.66
   7  -2  -8  411.31   84.61
  -7   2   8  346.03   42.69
   7  -2  -8  306.64   50.94
  -7   2   8  335.29   45.47
  -7  -2   8  292.90   50.85
  -3  -2 -16  116.90   28.61
  -3  -2 -16  157.15   29.64
  -3   2 -16  122.50   28.04
   3   2  16   84.74   28.56
   3  -2  16  138.19   18.55
   6   4   8    7.92    6.56
  -6   4  -8   47.99   13.02
  -6  -4  -8    0.14   10.09
   6  -4   8   16.48   15.48
  -6  -4  -8    9.82    4.09
  -6  -4  -8   10.91    4.84
  -7  -2  -8  235.54   33.10
  -7  -2  -8  276.88   38.73
   7   2   8  226.34   54.86
  -7   2  -8  264.51   61.86
   7   2   8  170.58   30.78
   7  -2   8  171.27   28.00
   7  -2   8  260.72   42.13
  -7   2  -8  212.74   48.46
   5   1 -14   89.79   15.98
   5   1 -14   44.82   13.03
  -5   1  14   64.24   12.57
  -5  -1  14   59.79   14.88
   5  -1 -14   74.42   15.63
  -5   1  14   58.62   23.17
   5  -1 -14   47.97   13.09
  -5  -1  14   75.30   48.83
  -7   1   9 1358.01   77.82
  -7  -1   9 1276.07   75.63
   7  -1  -9 1318.98   80.78
   7   1  -9 1239.35   93.89
  -7   1   9 1197.81   70.04
  -7  -1   9 1023.73   77.17
   7  -1  -9 1061.83   69.20
   7  -1  -9 1280.46   73.21
  -5   1 -14    4.27   10.14
   5  -1  14    7.95    8.89
  -5  -1 -14   25.19   19.58
  -5  -1 -14   18.98   11.54
  -5   1 -14    8.82    6.67
   5   1  14   16.62    8.70
   8   1  -3   12.73   10.86
  -8   1   3   10.03    8.60
  -8  -1   3    1.57    1.94
  -8  -1   3   -0.71    1.41
  -8  -1   3   18.56   17.12
   8  -1  -3   30.49   12.72
  -2   3  16   35.32    7.93
  -2  -3  16   55.35   14.03
  -2   3  16   54.45   21.55
   2   3 -16   31.63    7.44
  -2  -3  16    5.37   13.52
  -2   3  16   34.25    7.23
   2  -3 -16   38.88   23.51
  -8  -1  -3  144.33   22.80
   8   1   3  117.99   32.86
   8  -1   3  142.51   26.49
  -8  -1  -3  134.66   20.21
  -8   1  -3  175.44   31.87
  -7  -1  -9 2046.43  116.74
  -7  -1  -9 1763.30  122.71
  -7  -1  -9 2006.67  126.01
   7   1   9 1657.18   96.08
  -7   1  -9 1890.96  129.69
   7  -1   9 1757.20  100.47
  -7   1  -9 1895.99  108.74
  -7  -1  -9 2211.50  128.70
   7  -1   9 1999.61  131.72
  -7   1  -9 1915.56  149.40
   7   1   9 1873.60  113.68
   6  -1 -12 1126.08   68.16
   6   1 -12 1359.46   83.61
  -6  -1  12 1453.90   88.55
  -6   1  12 1326.61   75.85
   6  -1 -12 1342.82   85.99
  -6   1  12 1416.00  106.32
  -6  -1  12 1404.29   80.78
  -2  -3 -16  808.96   71.54
  -2   3 -16  898.50   96.00
   2   3  16  912.07  140.57
  -2  -3 -16  807.81   71.52
   2  -3  16  777.86   91.55
   2  -3  16  928.16   85.09
   3  -4 -14 1628.73   98.52
   3   4 -14 1330.84   74.69
  -3  -4  14 1351.85   84.77
  -3  -4  14 1532.85  118.62
  -3   4  14 1571.13   93.18
  -4   2  15   11.67   14.20
  -4  -2  15   55.15   21.48
   4   2 -15   22.35    7.21
   4  -2 -15   13.67    9.41
  -6  -1 -12  388.59   58.79
  -6  -1 -12  563.22   96.04
  -6  -1 -12  491.94   29.19
   6  -1  12  459.23   81.05
   6   1  12  419.37   96.37
  -6   1 -12  496.23   92.74
  -6   1 -12  488.56   21.82
  -6   1 -12  524.07   52.02
  -3  -4 -14  679.88   61.57
  -3  -4 -14  621.67   62.13
   3  -4  14  566.88   52.65
   3  -4  14  583.52   64.29
  -3  -4 -14  637.10   64.03
   3   4  14  471.79   60.90
  -3  -4 -14  596.60   62.88
   7  -4  -2  328.24   52.40
  -7   4   2  483.88   39.45
   7  -4  -2  354.95   83.68
   7  -4  -2  381.35   47.40
   7   4  -2  491.19   42.31
  -7  -4   2  479.57   37.25
  -7   4  -2 1004.02   76.76
   7  -4   2  910.65   79.26
  -7  -4  -2 1096.68   64.79
   7  -4   2 1249.05   81.46
   7  -4   2 1012.06   18.79
  -7  -4  -2 1067.89   67.88
   7   4   2  965.62   89.75
   4  -2  15   26.16   12.47
  -4  -2 -15   53.06   14.49
  -4   2 -15    1.99   12.09
   4   2  15   15.72   14.34
  -4  -2 -15   18.55   12.93
  -4  -2 -15    4.69   15.92
  -2  -7   7  117.50   20.09
   2  -7  -7   93.51   16.52
   2  -7  -7   73.17   47.97
  -3  -7   5  211.99   45.34
   3  -7  -5  166.99   41.91
  -3   7   5  162.54   18.00
  -3  -7   5  159.32    8.18
   3  -7  -5  155.82   27.73
   3  -7  -5  204.02   32.07
   2  -7   7  417.90   52.22
  -2  -7  -7  349.31   47.85
   2  -7   7  334.41   53.13
  -2  -7  -7  412.42   52.80
  -2  -7  -7  409.12   49.99
  -3  -7  -5   19.86    8.91
  -3  -7  -5   14.76   13.29
   3   7   5   43.24   14.23
   3  -7   5   26.64    8.21
   3  -7   5   24.85   18.38
   5  -6  -4 1258.47   88.05
  -5  -6   4 1105.53   67.18
  -5   6   4 1030.77   61.03
   5   6  -4 1233.84   80.28
   5  -6  -4 1279.03   80.42
  -5  -6   4 1424.52   90.00
   5   6   4  227.07   50.24
  -5  -6  -4  271.16   36.61
  -5  -6  -4  215.38   54.23
   5  -6   4  241.17   61.66
  -8   0   4  109.15   22.28
   8   0  -4  161.38   40.94
   1  -7  -8  109.35   40.69
   1  -7  -8  156.82   19.49
  -1   7   8  121.13   23.00
  -1  -7   8  140.68   45.59
  -1  -7  -8  587.65   69.11
   1  -7   8  509.00   61.54
   1  -7   8  565.66   51.34
  -1  -7  -8  608.13   56.81
  -1  -7  -8  624.56   63.52
  -8   0  -4  532.73   46.50
   8   0   4  586.81   63.07
  -8   0  -4  430.85   58.57
   0   0  18  883.67   87.31
   0   0 -18  817.09   87.23
   0   0  18  799.39   74.70
  -5  -4  11   32.82   13.69
   5   4 -11    7.77    5.47
  -5   4  11   40.86   11.59
  -5   4  11   13.49    5.88
   5  -4 -11   44.09   16.15
   5   4  11  488.63   84.28
  -5  -4 -11  456.29   68.81
  -5  -4 -11  371.85   49.91
   5  -4  11  473.48   69.08
   0  -5 -14    4.44    3.63
   0   5 -14    0.95    1.62
   0  -5 -14   10.32    8.75
   0  -5  14    8.72    9.77
   0  -5  14   -0.28    1.33
   0  -5  14    1.18    9.45
   0   5  14    2.93    2.87
  -2  -4  15 2516.52  147.87
   2   4 -15 2091.14  114.80
  -2  -4  15 2290.63  135.52
  -2   4  15 2376.28  140.65
   2  -4 -15 2504.89  147.10
   2  -6 -11   36.07    9.33
  -2  -6  11   15.03   14.49
  -2  -6  11   73.53   17.03
   2  -6 -11   34.57   20.58
   2  -4  15   17.61    6.54
  -2  -4 -15   -1.56    5.20
   2  -4  15   12.17    4.73
  -2   4 -15    5.01    3.77
   2  -4  15   10.04    9.54
  -2  -4 -15   10.96    5.29
  -2  -4 -15   10.23    5.88
   2   4  15   13.57   12.36
   2  -6  11  417.09   57.68
  -2  -6 -11  407.48   55.37
   2  -6  11  430.14   54.67
   2   6  11  335.60   51.08
   2  -6  11  369.45   51.64
  -2  -6 -11  423.69   52.55
  -2  -6 -11  459.36   56.63
   7  -4  -3    0.06    2.30
  -7  -4   3   14.43   16.87
   7  -4  -3   -4.07    9.09
   7  -4  -3    8.87    5.13
  -7   4   3    6.78    2.26
   7   4  -3   12.50    6.09
   4   5 -11 1919.80  103.21
  -4  -5  11 2434.52  141.66
  -4   5  11 2555.84  148.82
   4  -5 -11 2377.35  140.46
   4   5 -11 1980.06  106.44
  -7   4  -3   13.74   11.15
   7   4   3   41.70   13.59
   7  -4   3   -0.62    3.64
   7  -4   3   35.36   14.25
  -7  -4  -3    9.06    7.80
  -7  -4  -3    9.64    6.44
   6  -5  -5   60.67   11.18
  -6  -5   5   68.01   11.18
   6  -5  -5  113.25   20.90
  -6  -5   5  133.25   39.07
   6   5  -5   86.02   25.04
   4  -6  -8    9.63    5.94
  -4   6   8    8.45    8.10
   4  -6  -8   12.49    8.53
  -4  -6   8    7.10    7.93
  -4   6   8    1.53    2.43
   4  -5  11  401.78   63.77
   4  -5  11  319.02   53.95
   4   5  11  347.61   76.39
  -4  -5 -11  377.73   58.53
  -4  -5 -11  533.30   57.04
  -4  -5 -11  360.65   45.32
   4  -5  11  329.63   61.71
  -6  -5  -5 1363.22   89.65
  -6  -5  -5 1340.14  100.15
   6  -5   5 1509.39  104.57
  -6   5  -5 1328.07   80.98
   6   5   5 1507.22   93.37
   6  -5   5 1218.21   80.77
  -4  -6  -8   55.26   26.35
   4  -6   8   41.21   10.68
  -4  -6  -8   45.16   22.15
  -4  -6  -8   34.15   21.42
   4  -6   8   53.79   21.55
   4  -6   8   38.92   13.16
   4   6   8   39.40   17.15
  -8  -2   0 1037.48   68.48
   8  -2   0  947.11   95.39
  -8  -2   0  881.48   75.99
   8   2   0  977.75   88.40
  -8   2   0 1054.40   75.36
  -1   0  18   -0.29    3.37
   1   0 -18   29.39   15.77
  -8  -1   4 1024.96   57.00
   8   1  -4 1096.28   84.83
   8  -1  -4 1203.12   87.73
  -8  -1   4 1234.68   82.22
  -8   1   4  929.96   92.21
   1   0  18   53.78   16.41
  -1   0 -18   -6.73    9.06
  -2  -2  17   22.37   10.08
  -2   2  17   11.42   12.33
   2  -2 -17    9.06    7.49
  -2   2  17    3.42    2.54
  -2   2  17   -0.96    3.71
   2   2 -17    5.06    5.32
  -2  -2  17  -19.46   14.81
  -2   2  17   -1.53    4.10
   2   2 -17   -2.65   12.45
   4   4 -13  221.28   34.61
  -4  -4  13  517.84   88.29
   4  -4 -13  363.76   68.59
   4   4 -13  340.90   41.12
  -4   4  13  318.23   68.65
  -4  -4  13  369.62   71.86
   8  -1   4 1716.78  130.26
  -8  -1  -4 1572.86   91.89
   8   1   4 1558.51  121.77
  -8  -1  -4 1558.46   94.17
   2  -2  17  547.03   51.47
   2   2  17  608.23   59.99
  -2  -2 -17  699.29   75.40
  -2   2 -17  630.18   80.83
   0  -1 -18  913.81   82.55
   0  -1  18  818.53   76.89
   0  -1  18  922.08   87.48
   0  -1  18  956.77   83.46
   0   1  18  899.94   95.57
   0   1  18  729.69   64.79
   0   1  18  774.20   75.10
   0   1 -18 1191.02  110.18
  -4  -4 -13  486.58   46.15
  -4  -4 -13  352.38   53.63
   4  -4  13  458.03   61.14
  -4  -4 -13  321.23   55.82
   4   4  13  340.15   73.81
  -8  -2   1  316.37   43.17
  -8  -2   1  261.56   51.90
  -8   2   1  302.77   71.08
   8  -2  -1  305.87   43.95
   8   2  -1  327.84   69.15
  -8   2  -1   34.29   20.08
  -8  -2  -1    5.77    5.15
   8   2   1   15.61   16.33
   8  -2   1    6.10   13.35
  -8  -2  -1   74.46   24.23
   3  -6 -10    5.73    9.67
  -3  -6  10    1.35   13.15
   3  -6 -10    3.36    2.38
  -3   6  10   15.68    5.04
  -3   6  10    8.34    7.93
   3  -6  10  343.89   50.36
  -3  -6 -10  407.98   59.67
   3   6  10  411.61   56.99
   3  -6  10  386.09   55.01
  -3  -6 -10  418.66   78.56
  -3  -6 -10  406.13   52.61
   3  -6  10  250.47   45.51
   3  -6  10  343.61   42.27
  -1  -5  14  610.14   75.35
  -1   5  14  518.17   45.08
  -1  -5  14  662.09   91.13
   1   5 -14  493.73   41.10
   1  -5 -14  617.44   61.14
  -1  -5 -14 2748.12  159.08
   1  -5  14 2441.16  135.61
   1  -5  14 2670.87  157.12
  -1  -5 -14 2600.64  145.28
   1   5  14 2330.54  137.62
   1   5  14 2562.70  148.61
  -1   5 -14 2412.98  136.72
   1  -5  14 2862.98  171.94
  -1  -5 -14 2629.23  144.19
  -5   5   9   43.14   13.49
   5  -5  -9   30.62    7.07
   5  -5  -9   40.39   21.94
  -5  -5   9   28.73   12.59
   5  -5  -9   43.53   10.23
   5   5  -9   45.18    9.72
   7   3  -7    7.80    5.08
  -7  -3   7    6.77    6.61
   7  -3  -7   -5.42    8.52
  -7   3   7    3.20    2.35
   7  -3  -7    6.67    2.88
  -7  -3   7   22.96   15.16
  -7   3   7    7.21    4.94
   7  -3  -7    3.04    2.62
   0  -6  12  195.96   38.30
   0  -6 -12  194.26   35.65
   0  -6  12  249.90   54.32
   0   6  12  139.51   20.20
   0  -6  12  117.79    9.53
  -5  -5  -9  147.90   43.94
   5  -5   9  118.11   24.48
  -5  -5  -9  156.54   41.65
   5   5   9   94.93   18.41
  -5  -5  -9  101.99   33.31
  -7  -3  -7   75.54   20.79
   7   3   7   57.65   23.45
   7  -3   7   73.56   20.87
  -7   3  -7  101.45   21.69
  -7  -3  -7  103.00   29.64
   7  -3   7   50.81   14.25
  -7   3  -7   64.01   19.45
  -4  -7   0  231.94   48.85
   4   7   0  337.30   52.24
   4  -7   0  326.49   50.21
   4  -7   0  287.41   50.60
  -4  -7   0  385.39   53.95
  -4  -7   0  353.83   47.19
  -3   0  17 1066.45   76.88
  -3   0  17 1032.01   63.22
   3   0 -17 1099.82   73.34
  -5   6   5    4.26    4.66
   5  -6  -5   13.27    8.87
   5  -6  -5    5.43    6.25
  -5  -6   5   20.66    9.40
   5   6  -5    1.97    3.33
  -5  -6   5    6.60    3.66
   3   0  17 1061.06   77.97
  -3   0 -17 1238.09   76.53
  -8  -2   2    7.87    5.39
  -8  -2   2   16.57   12.36
   8  -2  -2   19.92   14.49
  -8   2   2   16.53    9.34
   8   2  -2   19.73   10.02
   5  -6   5   23.72    5.51
   5   6   5   45.48    9.38
   5  -6   5   43.62   32.24
  -5  -6  -5   11.42    9.11
  -5  -6  -5   67.77   18.17
   8   0  -5    7.30    7.67
  -8   0   5    2.29    1.35
  -8   0   5    2.73    9.24
  -8  -2  -2  586.05   57.91
   8   2   2  508.27   62.98
  -8   2  -2  601.51   72.91
   8  -2   2  570.25   72.66
  -8  -2  -2  599.39   55.38
  -4   0  16  259.68   65.14
   4   0 -16  442.81   56.00
  -4   0  16  372.51   54.31
   4  -7  -1  476.25   86.66
   4  -7  -1  605.25   55.58
  -4  -7   1  438.85   56.88
   4   7  -1  503.51   61.42
  -4  -7   1  438.80   60.39
  -4  -7  -1  183.27   29.26
   4  -7   1  129.81   31.34
  -4  -7  -1  164.67   29.29
   4  -7   1  132.26   22.49
   4   7   1  133.05   21.16
   8   0   5   13.33   13.61
  -8   0  -5   33.07   21.86
  -8   0  -5   10.47    8.54
  -8   0  -5    2.13    1.66
   0  -8   0 1403.52   99.07
   4   0  16 2831.47  174.40
  -4   0 -16 2550.53  150.75
   0   8  -1  297.50   47.59
   0  -8  -1  350.44   50.80
   0  -8  -1  331.65   50.80
   0  -8  -1  392.54   49.35
   0  -8   1  254.45   48.61
   0  -8   1  300.91   59.10
   1  -1 -18  663.73   69.65
  -1   1  18  682.81   72.48
   1   1 -18  418.70   56.77
  -1   1  18  412.05   59.58
  -1  -1  18  446.90   58.15
  -1   1  18  358.59   52.00
  -1  -1  18  465.78   55.75
  -1   1  18  489.04   33.24
   1   1  18    3.66    5.81
  -1   1 -18   -5.27   11.86
  -1  -1 -18  -11.38   12.28
   1   1  18   30.44   20.83
   1  -1  18   14.62    8.35
   3  -7  -6   69.30   18.80
  -3   7   6   54.72   15.21
  -3  -7   6   61.10   21.78
   3  -7  -6   40.29    9.86
  -3  -7   6   54.57    6.06
   3  -7  -6   60.35   16.90
   3   7   6   32.31   19.61
  -3  -7  -6   46.89   26.42
  -3  -7  -6   34.05   11.74
  -3  -7  -6   16.82   10.34
   3  -7   6   49.55   21.17
   3  -7   6    8.83    9.49
   7  -4  -4  765.97   65.62
   7  -4  -4  729.90   79.28
   7   4  -4  744.48   65.68
  -7   4   4  842.39   91.22
  -7  -4   4  766.79   69.77
  -7   4  -4 1151.83   67.90
   7  -4   4 1180.76  101.59
  -7   4  -4 1203.38   75.91
  -7  -4  -4 1301.88  109.28
  -7  -4  -4 1207.89   80.20
   7   4   4 1150.51   82.24
   7  -4   4 1170.75   68.93
  -7   0  10    4.98    3.24
   7   0 -10    9.89    7.74
  -7   0  10   -7.58    4.28
   5   3 -13  303.06   36.79
  -5  -3  13  302.68   42.84
  -5   3  13  309.23   76.31
   5  -3 -13  349.10   58.74
  -5  -3  13  326.18   54.36
   4  -7  -2   22.84    6.88
   4  -7  -2   13.66   12.02
  -4  -7   2   18.30    6.49
   4   7  -2   20.84   13.27
  -4  -7   2    7.81    9.68
   0   3 -17  337.87   50.33
   0  -3  17  519.25   51.50
   0  -3 -17  570.01   76.25
   0  -3  17  470.48   61.69
   0  -3  17  548.73   54.54
   0   3  17  455.59   55.39
   0   3 -17  433.59   52.94
  -7   0 -10   -1.45   10.09
  -7   0 -10    3.02    4.36
  -7   0 -10   16.86   13.02
   7   0  10   11.07   17.50
   7   0  10    4.68    3.10
   4  -7   2  273.00   52.63
   4   7   2  314.58   52.76
   4  -7   2  247.79   48.88
  -4  -7  -2  310.15   44.19
  -4  -7  -2  250.89   60.46
   0  -7  -9  166.39   25.21
   0  -7   9   96.53   10.23
   0  -7   9  109.06   33.87
   0  -7  -9  127.54   22.08
   0   7  -9   85.01   20.43
   0  -7   9   90.12   10.64
   0  -7  -9  111.08   44.29
  -1  -6  12   22.46    9.50
   1  -6 -12    0.23    2.36
  -1   6  12    3.38    3.91
  -1  -6  12   16.72   10.73
   1  -6 -12   11.82   12.04
   1  -6  12 1243.02   85.49
  -1  -6 -12 1304.64  105.55
  -1  -6 -12 1412.91   94.20
  -1  -6 -12 1193.95   84.03
   1  -6  12 1168.23   68.30
   1  -6  12 1365.52  100.11
  -5  -3 -13  358.19   47.80
  -5  -3 -13  293.39   72.61
   5  -3  13  255.27   63.29
   5   3  13  225.83   45.67
  -5  -3 -13  236.99   55.31
  -5  -3 -13  295.46   79.34
  -5  -2  14   35.15   13.99
  -5   2  14   16.12    4.42
  -5  -2  14   13.76   14.23
  -5   2  14   69.95   29.52
   0  -8  -2  404.26   56.34
   0  -8  -2  355.59   46.03
   0  -8   2  382.27   50.85
   0  -8  -2  398.70   60.08
   0   8  -2  251.71   34.32
   0  -8   2  216.00   33.17
  -6  -4   9  733.40   66.62
  -6   4   9  818.83   73.97
  -6   4   9  843.00   79.41
   6  -4  -9  725.83   65.45
   6   4  -9  802.19   73.37
   6  -4  -9  679.46   58.64
  -7  -2   9   10.44    7.78
  -7   2   9   11.69    6.12
   7  -2  -9    3.56    4.27
  -7   2   9    6.36    4.71
   7  -2  -9   19.78    5.13
  -7  -2   9   30.38   10.32
   7  -2  -9   42.37   16.99
   7   2  -9   14.24    9.61
  -5  -2 -14  816.70   77.63
   5   2  14  874.53  102.82
  -5  -2 -14  904.33   96.56
   5  -2  14  909.98   96.09
  -5  -2 -14  994.61   63.18
  -5   2 -14  889.24   79.24
  -3  -1  17  215.35   36.39
  -3   1  17  162.38   22.41
  -3  -1  17  165.08   40.46
  -3   1  17  200.12   50.61
   3   1 -17  230.73   56.71
   3  -1 -17  283.28   54.66
   8   2  -3   70.42   25.83
   8  -2  -3   62.27   19.80
  -8  -2   3   45.48   10.39
  -8  -2   3   40.82   16.14
  -8   2   3   67.18   20.22
  -8  -2   3   30.88   14.77
  -6  -4  -9 1000.91   81.61
  -6  -4  -9 1119.88   71.04
   6   4   9  971.32   86.22
   6  -4   9 1162.12   80.27
  -6  -4  -9 1059.38   68.71
  -6   4  -9  994.57   33.14
  -8  -2  -3   33.09   10.32
   8  -2   3   26.45   19.33
  -8  -2  -3   32.33    8.73
  -8   2  -3   49.97   19.50
   8   2   3    9.20   11.15
   7   2   9  390.60   57.20
  -7  -2  -9  473.37   61.67
   7  -2   9  358.50   50.01
  -7  -2  -9  420.70   62.25
  -7  -2  -9  312.85   42.23
   7  -2   9  347.00   45.66
  -7   2  -9  316.58   41.53
  -7   2  -9  407.15   78.81
   6  -2 -12  508.67   48.75
   6  -2 -12  518.52   48.76
  -6  -2  12  533.48   51.67
  -6  -2  12  621.73   58.96
   6   2 -12  573.39   53.52
  -6   2  12  507.27   45.05
  -6   2  12  486.06   38.28
   3   1  17  670.65   63.46
   3  -1  17  611.06   64.09
  -3   1 -17  518.74   56.21
  -3  -1 -17  574.73   78.07
  -1  -8   0  134.87   51.04
  -1  -8   0   80.98   18.62
   1  -8   0  127.95   18.65
   1  -8   0  141.36   35.41
  -1   8   0  106.84   16.61
  -8  -1   5   27.27   11.12
   8   1  -5   37.63   19.90
  -8  -1   5   54.61   11.91
   8  -1  -5   51.39   30.54
  -8   1   5   42.59   13.41
   4   1 -16  168.53   51.20
  -4  -1  16  184.14   46.02
  -4  -1  16  111.74   20.67
  -4   1  16  145.01   18.68
   4  -1 -16  129.40   30.07
  -4   1  16  150.49   28.54
   2  -7  -8  165.91   45.51
  -2  -7   8  187.53   48.18
   2  -7  -8  179.41   26.13
  -8  -1  -5    0.01    1.80
  -8  -1  -5   19.37    9.51
   8   1   5    2.49    7.82
   8  -1   5    0.10    1.73
   8  -1   5   21.78   14.69
  -6   2 -12  990.44   56.79
  -6  -2 -12  847.39   83.07
  -6   2 -12  823.97   75.93
  -6  -2 -12 1018.53   77.97
  -6  -2 -12  985.07   37.19
  -6   2 -12  901.41   85.83
   6  -2  12  845.73   84.29
   6   2  12 1054.27   80.30
  -6  -2 -12  875.17   80.10
  -2  -7  -8   10.63   14.88
   2  -7   8   34.30   10.06
   2  -7   8    4.96   12.02
  -2  -7  -8   30.82   12.58
  -2  -7  -8    8.62    8.58
  -4  -1 -16  398.65   69.20
  -4  -1 -16  366.83   53.78
   4   1  16  333.64   49.48
  -4  -1 -16  420.16   55.14
   4  -1  16  404.90   51.68
  -4   1 -16  358.28   53.16
  -1  -8   1   79.07   16.06
   1   8  -1  131.81   22.81
   1  -8  -1  180.03   44.99
   1  -8  -1  134.32   34.98
  -1  -8   1  191.10   50.21
   1  -8  -1  118.85   17.57
  -1   8  -1  333.73   44.00
   1  -8   1  434.09   60.23
   1  -8   1  463.86   59.22
  -1  -8  -1  421.58   63.60
  -1  -8  -1  506.39   57.55
  -6  -5   6   59.69   16.13
   6  -5  -6   54.27    8.88
  -6  -5   6   78.75   18.94
   6  -5  -6   45.01   13.15
   6   5  -6   81.69   15.15
   0  -4 -16  298.86   67.52
   0   4  16  250.20   34.56
   0  -4  16  263.49   63.90
   0   4 -16  306.40   42.06
   0  -4  16  171.85   21.14
   0  -4  16  290.53   43.70
  -6  -5  -6   80.64   38.55
  -6  -5  -6   43.38   13.04
   6   5   6   42.51   51.77
   6  -5   6   54.81   17.98
   7  -1 -10  198.21   46.09
  -7  -1  10  102.44   23.86
   7  -1 -10  119.92   21.46
   7  -1 -10   90.63   22.03
  -7   1  10   99.98   19.44
  -7  -1  10   68.46   15.96
   7   1 -10  185.40   41.79
  -7   1  10  107.25   15.71
  -1   3  17  102.96   17.32
  -1  -3  17  105.37   27.64
  -1  -3  17  111.32   37.50
   1  -3 -17  124.98   28.97
   1   3 -17   81.79   19.70
   1  -7  -9  201.83   27.33
   1  -7  -9  121.38   42.35
  -1  -7   9  138.52   33.42
  -1   7   9  132.84   28.01
   6  -3 -11   16.95    6.44
  -6   3  11   47.00   21.11
  -6   3  11   13.83    5.69
   6  -3 -11   32.34    9.61
  -6  -3  11   23.84   16.14
   6   3 -11   26.57   10.20
   1   3  17  690.62   96.29
   1   3  17  470.66   68.94
   1  -3  17  540.75   72.88
   1  -3  17  594.28   78.02
  -1   3 -17  620.73   83.60
  -1  -3 -17  532.84   74.32
   1  -3  17  530.16   66.87
   1  -7   9  868.80  110.88
  -1  -7  -9  893.08  113.46
  -1  -7  -9  982.91   76.00
   1  -7   9  833.03   98.34
  -1  -7  -9  983.21   40.26
   4   7  -3 1492.69  126.03
  -4  -7   3 1624.66  146.41
   4  -7  -3 1642.10  140.31
   4  -7  -3 1634.46  140.41
  -4  -7   3 1336.79  112.57
  -4  -7  -3 1890.92  160.98
  -4  -7  -3 1915.09  163.61
   4  -7   3 1577.23  155.47
   4   7   3 1657.61  142.24
   4  -7   3 1893.40  163.31
  -7  -1 -10    9.23    5.08
  -7  -1 -10   27.10   19.07
  -7   1 -10   11.72    6.82
   7  -1  10    2.75    2.18
   7  -1  10   12.78   13.98
  -7  -1 -10   10.33   10.27
  -7  -1 -10   15.03   14.81
  -7   1 -10    4.04    2.72
   7   1  10    3.24    6.27
  -7   1 -10   18.58   15.60
   6   3  11  204.05   43.07
  -6  -3 -11  183.62   44.45
   6  -3  11  178.37   33.44
  -6  -3 -11  135.80   39.40
  -6   3 -11  195.67   42.48
  -6  -3 -11  180.05   39.43
   1   8  -2 1632.63  143.39
  -1  -8   2 1710.41  142.20
   1  -8  -2 2105.61  186.21
  -1  -8   2 1914.49  188.19
   1  -8  -2 1743.21  144.58
   1  -8  -2 2018.31  183.99
  -1  -8  -2 1147.72  102.80
  -1  -8  -2 1094.81  103.64
  -1   8  -2 1059.35   88.58
   1  -8   2 1269.30  114.78
  -1  -8  -2 1180.31  111.69
   6   0 -13    8.76    1.85
  -6   0  13   49.19   19.63
  -6   0  13    2.76    5.79
   6   0 -13    7.56    7.48
   0  -8   3 1981.20  188.08
   0  -8   3 1650.57  137.60
   0   8  -3 1555.72  131.86
   0  -8  -3 2138.94  184.03
   0  -8  -3 1870.19  170.83
   0  -8  -3 1783.26  153.41
  -3  -5  13   75.63   27.51
   3  -5 -13   49.27   34.31
  -3   5  13   76.82   23.07
  -3  -5  13   69.71   25.37
   6   0  13   16.47   15.31
  -6   0 -13    5.84   10.19
  -6   0 -13    7.56    8.35
  -6   0 -13    7.88   10.47
   3  -5  13   10.11    5.80
  -3  -5 -13   18.74    6.80
   3  -5  13   41.73   11.04
  -3  -5 -13    7.25   12.17
  -3  -5 -13    9.42    9.81
   2   0 -18 2463.49  207.03
  -2   0  18 2674.96  224.19
  -2   0  18 2284.49  193.26
   2   0  18   97.72   15.23
  -2   0 -18  146.71   41.47
   5  -6  -6 1364.02  115.77
  -5   6   6 1279.82  107.12
  -5  -6   6 1399.85  121.30
   5   6  -6 1281.31  108.34
  -5  -6   6 1103.92   98.01
  -5   6   6 1256.70  107.95
   5  -6  -6 1355.72  113.29
  -8   0   6 1827.27  152.68
  -8   0   6 1513.32  123.75
   8   0  -6 1704.50  144.09
   5  -6   6  560.97   66.44
   5  -6   6  601.79   76.68
   5   6   6  668.90  101.03
  -5  -6  -6  698.52  100.42
  -5  -6  -6  607.74   74.55
  -7  -4   5  498.39   69.55
   7  -4  -5  353.82   48.83
  -7   4   5  500.15   69.47
   7  -4  -5  499.73  106.65
   7   4  -5  520.67   64.92
   7  -4  -5  475.43   59.20
   7  -4  -5  284.32   64.11
  -8   0  -6 1621.34  138.87
  -8   0  -6 1311.59  111.85
   8   0   6 1422.93  116.97
   8   0   6 1551.46  134.32
  -8   0  -6 1595.95  138.75
  -7  -4  -5  360.38   69.47
   7   4   5  311.95   59.40
   7  -4   5  399.28   57.05
  -7   4  -5  413.22   73.35
   7  -4   5  283.91   40.52
  -7   4  -5  328.10   47.42
  -7  -4  -5  344.39   48.98
  -1  -4  16 1258.49  111.82
  -1   4  16 1131.96   94.57
  -1  -4  16 1330.13  118.52
   1   4 -16 1147.05   94.77
   1  -4 -16 1295.58  113.02
   1  -4  16  736.10  101.93
   1   4  16  702.25  109.73
   1  -4  16  646.01   89.09
  -1   4 -16  492.53   66.19
   1  -4  16  649.05   78.96
  -1  -4 -16  538.38   70.51
   1   4  16  516.95   67.54
   8   2  -4   18.85   10.03
  -8  -2   4    5.57    3.67
   8  -2  -4   11.70   14.05
  -8  -2   4   12.46   12.05
  -8  -2  -4   71.07   24.76
   8  -2   4   35.22    8.23
  -8  -2  -4   73.44   17.18
   8   2   4   59.72   31.66
   8  -2   4   53.45   20.47
  -8   2  -4  108.64   31.56
   0   2 -18  845.09  108.69
   0  -2 -18  980.56   45.76
   0  -2  18  928.95  114.34
   0  -2  18  979.32   38.35
   0  -2  18  884.28  113.82
   0   2  18  835.14  100.70
  -5   0  15 1677.10  138.24
   5   0 -15 1523.82  126.94
  -5   0  15 1905.12  163.16
   5   0 -15 1815.44  153.84
  -4   6   9   77.20   22.06
  -4  -6   9   99.45   28.16
  -4   6   9   72.04   20.59
   4  -6  -9   87.71   14.02
   4  -6  -9  100.56   26.18
   2  -5 -14  382.37   65.22
  -2  -5  14  359.07   52.48
  -2  -5  14  306.66   72.50
   4  -6   9 1513.01  128.67
   4  -6   9 1355.90  118.57
  -4  -6  -9 1500.67  131.11
   4  -6   9 1513.40  131.55
   4  -6   9 1716.76  147.73
  -4  -6  -9 1826.52  158.82
  -4  -6  -9 1762.20  149.30
   4   6   9 1513.85  131.94
  -2   5 -14   26.15    8.06
   2  -5  14    5.75    7.20
  -2  -5 -14   23.50   11.31
  -2  -5 -14   33.51   19.61
  -2  -5 -14   50.16   13.25
   2   5  14   31.36   12.94
   2  -5  14    7.81    6.06
  -2  -5 -14    2.94    5.55
   2  -5  14   11.75   11.40
  -5   0 -15   26.66   14.72
  -5   0 -15   17.05    9.30
   5   0  15   36.38   11.81
  -5   0 -15    6.60   10.42
  -3  -3  16  779.15  108.43
  -3   3  16  740.50  100.49
   3  -3 -16  788.54  102.32
  -3  -3  16  819.21  105.87
  -7  -3   8  437.53   58.47
  -7   3   8  468.65   63.34
   7  -3  -8  482.17   69.96
   7  -3  -8  397.58   48.03
   7   3  -8  522.60   78.87
  -7   3   8  528.39   67.91
   7  -3  -8  513.18   95.51
  -3  -3 -16  657.92   85.67
  -3  -3 -16  586.89   75.24
  -3  -3 -16  637.64   82.75
   3  -3  16  554.97   90.04
   3   3  16  641.60   97.02
  -3   3 -16  483.44   60.87
   7  -3   8  914.67  112.19
   7  -3   8  627.67   81.29
  -7  -3  -8  687.54   95.96
   7   3   8  699.02   86.06
  -7  -3  -8  765.03   96.40
  -7   3  -8  819.64   99.24
  -7   3  -8  908.71  112.43
   1  -8  -3  180.61   40.05
   1  -8  -3  187.78   30.42
  -1  -8   3  121.00   56.81
  -1  -8   3  116.78   24.51
   1   8  -3  143.86   32.77
   1  -8  -3  216.16   54.14
  -1  -8  -3  550.19   77.78
  -1  -8  -3  576.23   76.40
  -1   8  -3  428.32   53.10
   1  -8   3  533.06  111.40
  -1  -8  -3  619.43   79.96
   6  -1 -13  234.49   41.01
  -6   1  13  214.60   58.65
  -6  -1  13  224.43   62.06
   6  -1 -13  172.23   28.07
  -6  -1  13  210.94   36.11
  -6   1  13  209.22   24.71
   3  -7  -7  431.44   52.90
  -3   7   7  649.20   84.24
  -3  -7   7  529.43   68.76
   3  -7  -7  523.16   64.67
   3  -7  -7  464.85   78.56
  -5  -4  12 1903.07  163.20
   5   4 -12 1963.65  161.58
   5  -4 -12 1910.16  166.50
  -5   4  12 1803.69  166.29
  -3  -7  -7  381.27   77.82
   3  -7   7  353.26   43.51
  -3  -7  -7  385.71   56.01
   3   7   7  357.49   56.24
   3  -7   7  380.97   50.18
   3  -7   7  403.49   84.63
  -3  -7  -7  419.81   54.86
  -6  -1 -13  388.46   60.20
  -6   1 -13  507.04   64.25
  -6  -1 -13  466.39   66.06
   6  -1  13  450.84   64.79
  -6  -1 -13  513.35   94.54
  -6   1 -13  500.87   66.20
   6   1  13  475.87   88.09
  -6   1 -13  545.81   98.25
  -5  -4 -12   -3.03    9.91
  -5  -4 -12    4.20    6.65
   5   4  12   13.27    5.54
  -5  -4 -12   13.59    6.75
   5  -4  12   13.06    6.76
   4  -7  -4   20.04   11.75
  -4  -7   4   15.14    7.23
  -4  -7   4    4.40   10.80
   4  -7  -4    3.80    6.79
   4   7  -4   11.11    8.72
   4  -7   4  109.54   27.88
  -4  -7  -4  135.62   42.78
  -4  -7  -4  108.94   28.44
   4  -7   4   94.24   20.90
   4   7   4  113.22   29.82
   2   1 -18  146.85   34.06
   2  -1 -18  170.41   33.39
  -2   1  18   78.50   24.08
  -2  -1  18  113.10   23.95
  -2  -1  18   66.48   41.87
  -2   1  18  164.27   37.21
   4  -3 -15 1440.68  122.81
  -4  -3  15 1420.26  121.82
  -4  -3  15 1363.73  117.75
   4   3 -15 1170.80   99.68
  -4   3  15 1343.78  137.86
   2   1  18 1288.09  120.07
  -2  -1 -18 1349.70  123.48
  -2   1 -18 1403.45  132.34
   2  -1  18 1214.78  110.21
   8  -1  -6   50.37   17.98
  -8  -1   6   60.45   14.07
  -8   1   6   58.55   16.74
  -8  -1   6   89.10   25.71
   8   1  -6  116.70   38.90
  -8   1   6   56.61   12.63
   0  -8   4   10.38   15.48
   0  -8  -4   28.08    8.43
   0   8  -4    4.85    5.34
   0  -8   4    8.85    6.41
   0  -8  -4   46.07   19.56
   0  -8  -4   27.67   12.59
  -4  -3 -15  742.06  100.93
  -4  -3 -15  793.80  108.62
   4  -3  15  631.92   81.57
   4   3  15  678.81   87.02
  -4  -3 -15  689.83   92.00
  -4  -3 -15  644.93   80.42
  -4   3 -15  788.51  103.97
  -8  -1  -6  253.22   41.25
   8  -1   6  273.85   64.91
   8   1   6  241.65   52.54
  -8   1  -6  288.27   46.02
   8  -1   6  189.65   24.61
  -8  -1  -6  292.13   53.00
  -1  -2  18   14.69   12.88
  -1  -2  18    0.71    8.59
   1  -2 -18   21.90   18.60
   1   2 -18    8.04    7.79
  -1   2  18   27.16   11.85
  -1   2  18   11.06    3.94
  -1   2  18   23.35   12.98
   1   2  18  232.28   59.44
   1  -2  18  271.29   45.88
  -1  -2 -18  339.65   46.02
   1  -2  18  274.44   58.44
  -1   2 -18  324.10   45.22
  -5   5  10 1337.48  119.61
   5  -5 -10 1354.53  123.03
  -5  -5  10 1394.22  120.34
   5   5 -10 1415.06  118.27
   5   1 -15   25.06    9.09
   5  -1 -15    8.43   19.31
  -5   1  15   31.34   23.62
  -5  -1  15   92.48   20.94
   5   1 -15   58.15   19.96
  -5   1  15   55.07   13.68
  -5  -1  15   18.31    7.37
   2  -6 -12   94.55   15.36
  -2  -6  12  149.66   42.64
   2  -6 -12  148.15   42.65
  -2  -6  12  126.85   51.33
  -5  -5 -10  790.58  100.88
   5  -5  10  810.99   99.11
  -5  -5 -10  847.10  103.26
  -5  -5 -10  892.40  112.26
   5   5  10  751.24  141.07
   2   6  12   17.71    9.22
  -2  -6 -12   25.23   14.08
   2  -6  12    5.50    6.03
  -2  -6 -12    5.21   11.63
   2  -6  12   -3.04   10.24
  -2  -6 -12   20.63   11.50
   2  -6  12   16.01    6.62
  -5   1 -15  887.69  110.45
  -5  -1 -15  842.06  102.15
  -5  -1 -15  764.18  100.70
   5   1  15  735.29   97.82
  -5   1 -15  970.10   40.91
   5  -1  15  759.32   94.57
  -5  -1 -15  797.13   96.97
  -4   5  12    8.93    9.98
   4  -5 -12   21.06   10.47
  -4  -5  12   -0.56   12.42
   4   5  12  322.75   50.80
   4  -5  12  278.62   57.75
  -4  -5 -12  293.49   45.82
  -4  -5 -12  268.57   43.99
  -4  -5 -12  256.61   68.83
   4  -5  12  228.40   42.03
  -3   4  15  326.76   45.56
   3  -4 -15  361.52   47.52
   3   4 -15  242.96   35.04
  -3  -4  15  352.82   50.07
  -3  -4  15  290.47   40.76
   3  -6 -11   75.75   29.28
  -3   6  11   68.70   20.81
   3  -6 -11   24.75    7.79
  -3  -6  11   69.00   19.12
  -3  -4 -15  139.37   47.97
  -3  -4 -15  142.44   30.43
   3  -4  15  146.84   23.72
   3   4  15  195.37   54.33
   3  -4  15  128.45   39.49
  -3  -4 -15  146.02   29.69
  -3  -4 -15  113.84   48.55
  -3  -6 -11   57.34   24.70
   3   6  11   76.74   24.79
  -3  -6 -11   87.61   37.56
   3  -6  11   37.43   14.99
  -3  -6 -11   72.19   21.54
   3  -6  11   59.14   16.42
   3  -6  11   74.45   39.14
   3  -6  11   46.00   17.34
   6  -5  -7  696.96   86.12
   6  -5  -7  868.87  105.92
   6   5  -7  881.94  106.61
  -6  -5   7  844.41  116.95
  -2  -8   0  332.41   51.70
   2  -8   0  341.40   47.99
  -2  -8   0  200.02   41.09
   6   5   7  500.81   78.53
  -6  -5  -7  594.38   77.23
  -6  -5  -7  537.88   77.64
   6  -5   7  618.38  121.72
  -3  -2  17  610.44   92.36
  -3   2  17  567.68   68.20
   3  -2 -17  671.54   85.93
  -3   2  17  594.89   70.06
  -3   2  17  709.48   92.09
  -3  -2  17  668.64   87.89
   3   2 -17  738.04  109.74
   2  -8  -1  791.48  105.67
  -2  -8   1  611.93   87.50
   2  -8  -1  683.74   93.50
  -2   8   1  647.71   75.30
  -2  -8   1  907.01  113.04
   2  -8   1   82.81   27.03
  -2  -8  -1   86.35   41.77
  -2  -8  -1   90.67   19.33
  -3   2 -17  479.52   82.38
   3  -2  17  460.80   62.56
   3   2  17  503.61   75.04
  -3  -2 -17  299.83   41.40
   8   2  -5  165.19   44.15
  -8  -2   5   96.81   19.30
  -8  -2   5  175.92   23.88
   8  -2  -5  190.51   43.51
   4   2 -16 1812.67  153.26
  -4  -2  16 2013.04  186.92
  -4   2  16 2147.75  181.93
  -4  -2  16 1839.55  158.53
   8   2   5  193.54   43.55
  -8   2  -5  116.81   28.12
  -8  -2  -5  206.53   27.76
   8  -2   5  170.29   44.99
  -8  -2  -5  237.34   29.40
   8  -2   5  163.66   23.00
   1  -8  -4  627.53   84.27
   1  -8  -4  665.42   87.82
   1   8  -4  457.42   83.36
  -1  -8   4  504.40   64.72
   1  -8  -4  614.20   79.53
  -1  -8   4  801.85  128.61
  -1  -8  -4 2788.49  231.93
   1  -8   4 2548.40  212.76
   1  -8   4 2812.27  235.49
  -1  -8  -4 2801.89  238.07
  -1   8  -4 2522.04  207.24
  -1  -8  -4 2391.14  199.71
   4   2  16 1415.82  126.91
   4  -2  16 1340.97  117.22
  -4   2 -16 1240.93  108.96
  -4  -2 -16 1240.09  117.47
  -4  -2 -16 1207.91  104.09
  -4  -2 -16 1235.98  107.61
   8  -3   0  277.61   54.42
  -8   3   0  221.64   57.61
   8   3   0  241.83   48.53
  -8  -3   0  227.06   54.84
  -8  -3   0  240.29   32.42
   7  -4  -6    5.75    2.37
   7  -4  -6    2.48    2.69
   7   4  -6    6.79    3.48
  -7  -4   6   13.23    9.44
   7  -4  -6   12.10   10.92
  -7   4   6    5.04    3.35
   0  -7  10  589.12  126.92
   0  -7  10  528.01   61.31
   0  -7  10  481.90   55.94
   0  -7 -10  688.66  106.57
   0  -7 -10  623.33   77.15
  -2  -3  17  471.16   59.24
  -2   3  17  444.74   49.28
  -2  -3  17  495.36   65.39
  -2   3  17  422.05   55.91
  -2   3  17  455.78   55.09
   2   3 -17  366.62   54.47
   2  -3 -17  432.14   67.37
   7  -4   6   35.88   24.67
  -7  -4  -6   27.18   14.00
   7   4   6    6.94   13.77
  -7   4  -6   -2.67    9.97
   7  -4   6    3.47    2.68
  -7   4  -6    2.84    8.06
  -7  -4  -6   16.90    9.54
   0  -5  15  605.87   71.77
   0  -5  15  680.93   94.81
   0  -5  15  801.09   99.04
   0  -5 -15  700.59   87.75
   0   5  15  577.51   70.79
   0  -5 -15  632.85   77.85
   0   5 -15  602.20   72.66
   2  -7  -9  767.93  103.23
   2  -7  -9  658.62   80.66
   2  -7  -9  559.16   71.39
  -2  -7   9  630.94   84.34
   2  -3  17  162.32   46.49
  -2  -3 -17  121.85   25.52
   2  -3  17  130.59   20.78
  -2   3 -17  148.92   37.99
   2   3  17  183.24   44.40
  -2  -7  -9 1860.94  163.68
   2  -7   9 1602.59  133.02
   2  -7   9 1789.36  176.87
   2  -7   9 1724.66  144.92
  -2  -7  -9 1766.69  154.79
  -2  -7  -9 1791.00  151.24
  -8  -3   1  561.22   70.76
   8   3  -1  437.03   53.12
  -8  -3   1  428.86   50.21
  -8   3   1  467.53   66.01
   8  -3  -1  497.77   96.85
   8  -3   1 1335.00  137.28
   8   3   1 1227.96  117.01
  -8  -3  -1 1354.88  112.14
  -8   3  -1 1286.67  123.06
  -8  -3  -1 1286.82  113.59
  -4  -4  14 1223.03  108.67
   4   4 -14 1031.39   85.68
  -4  -4  14 1013.96   88.96
   4  -4 -14 1102.07   97.54
  -4   4  14 1163.30  102.03
   4   4 -14 1069.63   90.28
  -6   4  10  381.74   62.80
  -6  -4  10  369.33   69.10
   6  -4 -10  286.81   34.60
   6   4 -10  414.63   48.74
   6  -4 -10  328.19   57.25
  -6   4  10  327.77   45.88
   2  -8  -2   76.98   40.21
  -2  -8   2   64.68   17.76
  -2  -8   2   86.24   12.71
   2  -8  -2   80.34   24.49
   7  -2 -10   49.54   12.61
   7   2 -10   42.41   17.50
   7  -2 -10   33.90    8.72
  -7  -2  10   33.76   15.32
  -7   2  10   35.93   13.37
  -7   2  10   37.15    8.92
  -2  -8  -2  392.80   55.08
   2  -8   2  376.22   55.21
  -2  -8  -2  473.30   60.86
   0  -6 -13   13.01   13.70
   0  -6  13    1.92    1.84
   0  -6  13   20.43   13.51
   0   6  13    7.79    2.31
   0  -6  13   11.58    7.03
   0  -6 -13    6.47    2.97
   0  -6 -13   18.12    6.18
   7   0 -11 1455.76  124.68
  -7   0  11 1692.28  150.31
  -7   0  11 1377.39  121.65
   5   6  -7   29.10    9.86
   5  -6  -7   28.00   10.54
  -5   6   7   39.69   11.26
  -5   6   7   27.24    7.59
   5  -6  -7   27.61    8.54
  -5  -6   7   50.57   23.41
   5  -6  -7   50.64   16.73
  -4  -4 -14   27.53   26.82
   4   4  14  126.73   30.14
   4  -4  14   85.97   22.20
  -4  -4 -14   68.75   24.66
  -4  -4 -14  100.36   29.45
  -4  -4 -14   88.48   24.68
  -8   0   7    1.76    5.74
  -8   0   7    6.27    4.56
   8   0  -7    4.15   14.06
   6   4  10  198.33   29.71
   6  -4  10  290.64   60.05
  -6  -4 -10  273.87   62.18
  -6  -4 -10  152.43   39.03
  -6  -4 -10  196.76   44.28
   5  -6   7   20.35    6.37
   5   6   7   35.18   18.02
  -5  -6  -7   40.69   34.79
  -5  -6  -7   55.95   24.95
   5  -6   7   35.26   21.07
   7   2  10  479.77  100.15
   7  -2  10  595.96   87.47
  -7  -2 -10  646.66   80.16
  -7  -2 -10  598.96   76.70
  -7  -2 -10  587.04   73.26
   7  -2  10  435.14   60.65
  -7   2 -10  713.25   88.45
  -7  -2 -10  656.35  124.78
  -7   2 -10  585.60   98.21
   4  -7  -5  233.72   47.72
   4  -7  -5  288.31   40.50
  -4   7   5  325.07   41.71
  -4  -7   5  377.08   48.47
   4  -7  -5  335.61   56.42
  -4  -7   5  247.85   36.20
  -7   0 -11  550.92   68.52
   7   0  11  459.61   69.58
  -7   0 -11  618.38   86.43
  -7   0 -11  514.90   86.94
  -4  -7  -5  432.95   63.60
   4  -7   5  422.23   57.08
   4  -7   5  373.62   48.06
  -4  -7  -5  416.71   56.04
   4   7   5  413.27   57.18
  -8   0  -7   27.79   18.25
   8   0   7   14.59    9.52
   8   0   7    8.20    4.10
  -8   0  -7   -1.11    5.33
  -8   0  -7   14.36   15.86
   0  -8  -5 1292.89  113.62
   0   8  -5 1230.84  112.99
   0  -8  -5 1447.01  129.19
   0  -8   5 1276.21  110.98
   0  -8   5 1293.70  131.22
   0  -8   5 1167.03   99.42
   0  -8  -5 1748.23  157.00
   2   4 -16  244.71   41.51
   2  -4 -16  294.91   77.78
  -2  -4  16  384.19   97.59
  -2   4  16  308.31   41.55
  -2  -4  16  295.93   66.06
   8  -3  -2 1184.42  102.53
   8   3  -2 1327.72  116.59
  -8  -3   2 1243.24  130.71
  -8   3   2 1121.54  103.73
  -8  -3   2 1202.24  109.94
   2   4  16   51.11   22.06
   2  -4  16   25.25   15.33
  -2  -4 -16   20.13   15.62
  -2  -4 -16    8.60    5.40
   2  -4  16   -2.88    8.85
   2  -4  16   18.11   13.42
   8  -3   2  491.28   87.15
   8   3   2  466.81   71.07
  -8   3  -2  444.24   66.22
  -8  -3  -2  464.01   75.66
  -8  -3  -2  476.58   60.29
   1  -7 -10  740.22   88.93
  -1  -7  10  850.12  103.65
  -1   7  10  587.37   89.59
   1  -7 -10  726.63   94.99
  -1  -7 -10    4.78    7.89
   1  -7  10    5.99    6.98
  -1  -7 -10    1.40    4.56
   1  -7  10    1.83    1.50
  -1  -7 -10   22.25    8.00
   1  -7  10    6.18    4.26
  -1  -5  15   89.02   28.58
   1   5 -15   51.04   11.49
  -1   5  15   60.27   15.64
   1  -5 -15   68.05   23.22
  -1  -5  15   74.89   28.23
   1  -5  15    1.06    5.24
  -1  -5 -15    5.44    6.29
   1   5  15    4.53    3.34
  -1   5 -15    2.96    2.73
  -1  -5 -15   14.49    5.96
   1  -5  15  -20.30   11.14
  -1  -5 -15    4.56    4.83
   1  -5  15    6.69   12.60
   6  -6   0  204.82   29.72
   6  -6   0  207.63   39.50
  -6  -6   0  189.94   48.93
  -6  -6   0  197.48   41.60
   6   6   0  187.53   43.97
   0   0  19  143.35   56.19
   0   0 -19   -5.44   11.28
   0   0  19   11.69    7.60
   1  -6 -13   14.77    9.45
  -1  -6  13   35.31   17.53
  -1   6  13   -0.56    3.33
  -1  -6  13    8.80    8.96
   1  -6 -13    7.56    3.11
  -1  -6 -13   45.55   16.64
   1  -6  13    2.71    4.29
   1  -6  13   19.83   16.94
   1  -6  13   44.33   14.43
  -1  -6 -13   21.31   14.33
  -1  -6 -13   23.57   12.26
   1   6  13    0.04    5.98
  -2  -8   3  399.21   58.56
   2  -8  -3  542.21   92.86
   2  -8  -3  443.84   79.24
  -2  -8   3  295.81   53.52
   2  -8   3  438.45   71.64
   2  -8   3  425.18   99.04
  -2  -8  -3  409.43   54.30
  -2  -8  -3  347.03   49.20
   6  -6  -1   12.75    7.15
   6  -6  -1   28.49   12.81
  -6  -6   1   25.80   27.40
   6   6  -1   31.89   11.19
  -6  -6   1   36.21   16.93
   6  -6   1 1609.57  140.22
  -6  -6  -1 1380.58  129.55
  -6  -6  -1 1600.81  141.60
   6  -6   1 1349.12  117.03
   6   6   1 1409.91  122.99
  -7  -1  11  980.26   39.93
   7  -1 -11 1019.93   97.51
  -7   1  11 1020.54   86.82
   7   1 -11 1050.04   95.39
  -7   1  11  806.90   96.57
   7  -1 -11  707.05  102.19
  -7   1  11  951.61  115.62
   7  -1 -11  973.28   32.66
   8  -1  -7   76.59   25.06
  -8  -1   7   72.23   19.99
  -8   1   7   64.40   15.77
  -8  -1   7   43.06   10.83
   8   1  -7   93.53   38.99
  -8   1   7   64.46   19.11
   7   1  11 1057.30   94.30
  -7  -1 -11 1059.20   94.14
  -7   1 -11 1173.63  104.43
  -7   1 -11 1140.07  108.12
  -7  -1 -11 1048.21   89.48
  -7   1 -11 1049.50   95.49
  -7  -1 -11 1016.13   97.79
   7  -1  11 1188.15  114.38
  -3  -7   8  371.16   52.74
  -3   7   8  330.25   58.56
  -3   7   8  494.11   64.64
   3  -7  -8  527.72   74.57
   3  -7  -8  396.83   56.01
   3  -7  -8  573.20   79.62
  -8   1  -7  338.36   71.87
   8   1   7  207.55   33.96
   8  -1   7  237.41   20.11
  -8  -1  -7  284.97   49.31
  -8   1  -7  368.30   86.65
   8  -1   7  350.33   74.90
  -8  -1  -7  266.70   39.76
   8   1   7  382.28   52.64
  -3  -7  -8 1265.28  111.59
   3  -7   8 1163.21   99.76
  -3  -7  -8 1644.36  168.03
   3  -7   8 1305.61  115.67
   3   7   8 1409.22  126.41
  -3  -7  -8 1495.81  138.91
   3  -7   8 1255.48  104.37
   3  -7   8 1272.44  136.37
  -6  -2  13   56.91   16.69
   6  -2 -13   23.67   12.84
  -6   2  13   13.82    4.81
   6   2 -13   15.63    8.21
  -6  -2  13   53.79   33.52
  -6   2  13   48.25   20.09
   6  -2 -13   13.99    4.68
   1  -8  -5  174.16   43.09
   1  -8  -5  106.78   36.99
  -1  -8   5  144.90   46.64
  -1  -8   5   95.33   17.74
   1  -8   5   14.40   11.76
  -1  -8  -5    7.71    8.64
  -1  -8  -5   10.44    9.03
  -1  -8  -5   22.34   10.96
  -1   8  -5    6.80    3.00
   1  -8   5   19.74    8.21
   5  -3 -14 1381.11  123.97
  -5  -3  14 1357.91  114.89
  -5   3  14 1381.66  127.52
  -5  -3  14 1587.27  145.58
   5   3 -14 1352.04  113.95
  -6   2 -13  272.78   44.54
  -6  -2 -13  233.98   35.86
   6   2  13  322.38   66.74
   6  -2  13  330.60   42.06
  -6   2 -13  289.17   70.05
  -6  -2 -13  284.16   52.56
  -6   2 -13  325.13   79.30
  -6  -2 -13  303.32   58.23
  -6  -2 -13  362.85   88.92
  -7  -3   9  953.70  114.57
  -7   3   9  867.78  106.65
  -7   3   9  690.82   86.64
   7  -3  -9  863.49  105.00
   7   3  -9  913.66  114.01
   7  -3  -9  680.95   84.82
   5   3  14   11.00   12.33
  -5  -3 -14   12.85    7.08
  -5  -3 -14   19.20   16.84
  -5  -3 -14   27.16   11.38
  -5  -3 -14   31.20   14.98
  -8  -3   3  161.72   32.15
   8   3  -3  162.76   48.12
  -8   3   3  190.29   37.39
   8  -3  -3  195.44   28.71
  -8  -3   3  191.05   28.57
   8  -3   3  461.19  100.45
   8   3   3  518.70   81.45
   8  -3   3  307.79   36.44
   8  -3   3  353.69   39.84
  -8  -3  -3  470.00   85.63
  -8  -3  -3  373.20   54.76
  -8   3  -3  382.35   93.97
   7  -3   9   23.24   13.65
   7   3   9    2.49    3.36
  -7  -3  -9   10.67    5.51
  -7   3  -9   10.31    8.38
  -7   3  -9   10.22    9.56
  -7  -3  -9   28.52    9.71
   7  -3   9   -0.77    4.20
  -7  -3  -9   11.41    6.93
   6  -3 -12  368.83   40.52
   6  -3 -12  438.92   69.03
  -6   3  12  444.16   57.53
   6   3 -12  404.12   50.57
  -6  -3  12  469.65   78.38
  -2   2  18  511.20  118.66
  -2   2  18  719.84   87.82
   2   2 -18  690.10   84.77
  -2   2  18  610.65   73.32
  -2  -2  18  786.40   99.88
   2  -2 -18  726.24   89.50
  -2   2  18  588.75   72.66
  -2  -2  18  625.90   76.08
   4  -6 -10   36.99   10.11
   4  -6 -10   59.39   15.67
  -4   6  10   25.84    9.86
   4  -6 -10   60.81   25.18
  -4   6  10   66.57   21.88
  -4  -6  10   50.17   24.13
   2   2  18    8.33   14.06
   2  -2  18    9.88    8.36
  -2  -2 -18    4.89    9.05
  -2   2 -18    9.71   13.10
  -6  -3 -12   38.96   18.38
   6   3  12   10.41    9.78
  -6  -3 -12   11.79   16.75
  -6  -3 -12    6.67    8.94
  -6  -3 -12   11.67    7.45
   6  -3  12    2.25    9.57
   6   6  -2  100.25   23.26
   6  -6  -2   73.66   20.82
   6  -6  -2   70.88   24.83
  -6  -6   2  120.83   26.79
   4  -6  10  108.44   26.76
  -4  -6 -10  186.95   43.71
   4  -6  10  145.27   36.90
   4  -6  10   65.28   20.61
  -4  -6 -10  102.03   21.58
   4   6  10   72.35   23.76
  -4  -6 -10   56.12   19.85
   4  -6  10   70.67   17.93
  -8  -2   6  746.30  110.29
   8  -2  -6  693.89   91.68
  -8  -2   6  525.28   68.84
  -8   2   6  579.55   78.57
   8   2  -6  578.85   71.88
  -6  -6  -2   48.42   13.52
   6  -6   2   36.19   24.09
   6   6   2   39.95   18.35
  -6  -6  -2   13.73   16.05
  -8   2  -6  548.18   77.81
  -8  -2  -6  602.52   79.50
  -8  -2  -6  524.19   65.96
   8  -2   6  403.28   46.50
  -8   2  -6  486.93   61.61
   8  -2   6  610.36   91.16
   8   2   6  555.73   81.75
   7  -5   0 2013.49  171.35
  -7  -5   0 2377.93  200.95
   7   5   0 2208.01  199.85
   7  -5   0 2350.97  206.14
   7  -5   0 2183.73  180.57
  -7  -5   0 2496.44  210.21
   4   0 -17   11.05    8.04
  -4   0  17    8.56    5.77
  -4   0  17   -1.51    2.45
   1   0 -19  991.99   96.68
  -1   0  19  962.22  115.05
   5  -2 -15 1323.10  139.99
  -5  -2  15 1408.63  121.32
  -5   2  15 1471.21  145.84
  -5  -2  15 1368.65  117.07
  -1   0 -19  924.17  118.22
   1   0  19 1053.09   92.81
   4   0  17    9.12   19.76
  -4   0 -17    7.30    6.24
   0  -1  19   46.89   18.65
   0  -1  19   92.84   23.68
   0  -1  19   64.30   22.10
   0  -1 -19   50.32   15.07
   0   1  19   78.69   23.28
   0   1 -19   70.39   21.78
  -5  -2 -15  166.57   31.59
  -5  -2 -15  183.95   48.75
  -5  -2 -15  171.33   42.36
   5   2  15  169.55   43.25
  -5   2 -15  176.00   39.55
   5  -2  15  203.90   46.61
  -7  -5   1   11.15    9.93
   7  -5  -1   12.33   10.20
   7  -5  -1    6.21    5.95
   7   5  -1    8.90    8.02
  -7  -5   1   10.37    8.74
   7  -5  -1    8.41    4.41
  -7  -5  -1  444.93   69.37
  -7  -5  -1  519.03   71.71
   7   5   1  388.64   67.78
   7  -5   1  458.45   82.81
   7  -5   1  274.23   41.89
   7  -5   1  437.15   54.44
  -6   5   8   31.21   10.56
  -6  -5   8   19.60   18.45
   6  -5  -8   29.62   19.91
   6  -5  -8   34.84    8.40
   6   5  -8   42.76   13.65
   6  -5  -8   28.58    8.51
  -3   0  18   10.26    8.21
   3   0 -18    4.08    8.89
  -3   0  18   -3.98   12.07
  -6  -5  -8   23.15   17.08
  -6  -5  -8   32.10   13.32
  -6  -5  -8   36.88   17.10
   6   5   8   35.66   17.49
   3   0  18   -3.33   10.48
  -3   0 -18    8.83   10.55
   7  -4  -7   74.50   17.51
   7  -4  -7   47.06   12.96
   7  -4  -7   65.88   26.91
  -7   4   7   71.13   24.91
   7   4  -7   49.29   20.03
  -7  -4   7   56.13   17.42
  -4  -7   6  213.95   26.18
   4  -7  -6  271.80   51.13
  -4   7   6  221.68   33.40
   4  -7  -6  213.38   26.52
  -4   7   6  224.42   30.75
   4  -7  -6  278.00   38.36
  -4  -7   6  289.09   69.80
  -4  -7  -6  226.21   31.28
   4  -7   6  325.15   74.43
   4   7   6  356.34   48.15
   4  -7   6  308.11   46.88
  -4  -7  -6  298.82   57.31
  -4  -7  -6  324.31   40.98
   7  -4   7  288.22   41.94
  -7   4  -7  472.63   61.55
  -7  -4  -7  385.36   91.37
  -7  -4  -7  385.84   51.38
   7  -4   7  364.67   54.28
   7   4   7  414.24   61.60
  -2  -8   4  441.19   51.20
  -2  -8   4  563.56   98.63
   2  -8  -4  723.99   88.96
   2  -8  -4  502.63   67.58
   2  -8   4   57.80   20.20
  -2  -8  -4   97.64   23.19
   2  -8   4  101.00   35.34
  -2  -8  -4   64.18   23.55
  -2  -8  -4   54.79   26.85
   6   0 -14  754.28   91.43
  -6   0  14  819.38  104.66
   6   0 -14  560.56   80.84
  -6   0  14  759.36   94.12
   0  -8  -6  176.82   37.86
   0   8  -6   84.17   26.27
   0  -8  -6  159.52   34.48
   0  -8   6   73.32   20.58
   0  -8   6  153.29   34.68
   0  -8  -6  164.57   48.41
   0  -8   6  136.53   25.89
  -3   5  14  127.75   27.56
  -3  -5  14  148.54   43.33
   3  -5 -14  150.04   33.70
  -3  -5  14  270.63   70.13
   6  -6  -3  276.44   47.56
   6  -6  -3  448.73   80.40
  -6  -6   3  386.13   52.19
   6  -6  -3  332.25   47.11
  -6  -6   3  294.75   55.45
   6   6  -3  362.32   50.49
  -6   0 -14  497.11   66.46
   6   0  14  611.17   88.73
  -6   0 -14  511.53   63.21
  -6   0 -14  693.21  104.43
   6  -6   3 1449.20  126.60
  -6  -6  -3 1310.94  114.02
  -6  -6  -3 1382.49  123.49
   6   6   3 1468.99  131.36
  -3  -5 -14 2224.06  192.20
   3  -5  14 2015.07  170.08
   3  -5  14 1780.45  154.14
  -3  -5 -14 2056.65  172.08
   3  -5  14 2186.57  183.97
  -3  -5 -14 2436.09  218.72
  -3  -5 -14 2242.38  198.90
   7   5  -2  509.73   64.01
   7  -5  -2  474.75   80.56
   7  -5  -2  370.44   47.95
  -7  -5   2  685.66   86.39
  -7   5   2  540.31   66.63
   7  -5  -2  512.73   71.47
   7  -5   2 1197.61   99.87
   7  -5   2 1255.89  109.15
   7   5   2 1120.12  115.88
  -7  -5  -2 1279.86  111.72
  -7  -5  -2 1124.33   98.85
   7  -5   2  930.52  120.24
  -7   5  -2 1121.53   97.46
  -8  -3   4  219.84   36.48
   8   3  -4  253.26   60.36
  -8  -3   4  172.51   32.64
   8  -3  -4  227.43   21.23
   8  -3  -4  242.48   43.55
  -8   3   4  321.89   65.42
  -8  -3  -4 1308.07  140.49
  -8  -3  -4 1170.63  103.41
   8  -3   4  946.96  112.80
  -8   3  -4 1211.92  121.39
   8  -3   4 1219.27  120.92
   8   3   4 1162.02  118.34
   0  -3  18  600.44   78.19
   0  -3  18  520.31   75.75
   0   3 -18  547.42   69.50
   0  -3 -18  581.06   74.25
   0   3 -18  425.11   51.22
   0   3  18  403.30   57.63
   0  -3  18  623.12   88.72
  -4  -1  17  614.04   77.24
   4   1 -17  490.07   65.79
  -4  -1  17  559.74   77.64
   4  -1 -17  517.87   69.89
  -4   1  17  529.66   64.64
  -4   1  17  509.33   78.84
  -1   1  19  113.19   22.62
  -1   1  19  199.39   43.26
   1   1 -19  165.18   37.20
   1  -1 -19  122.25   24.14
  -1  -1  19  165.77   45.46
  -1  -1  19  136.60   30.59
  -1   1  19   84.34   24.75
  -1   1  19   72.40   22.46
   5  -5 -11  140.64   28.92
   5   5 -11   95.60   17.77
  -5  -5  11   97.70   41.80
  -5   5  11  103.63   25.50
   1  -1  19  582.62  109.79
   1   1  19  530.69   72.37
  -1   1 -19  665.63   97.78
  -1  -1 -19  650.57   82.37
   1  -1  19  619.44   81.96
   5  -6  -8   18.66    4.79
  -5  -6   8   25.13   10.12
   5  -6  -8    2.41    6.95
   5   6  -8   20.01    6.44
  -5   6   8   18.41    8.46
  -5   6   8   17.64    5.98
   5  -6  -8   16.61    3.83
  -4   1 -17  495.47   65.07
  -4  -1 -17  484.58   74.89
   4  -1  17  627.63   86.09
   4   1  17  531.97   73.16
  -4  -1 -17  667.13   83.21
  -5  -5 -11   35.42   13.59
   5  -5  11    9.45    7.60
   5   5  11   25.51   18.65
  -5  -5 -11    3.68   16.48
  -5  -5 -11    8.52   12.00
   8   0  -8   41.33   16.10
  -8   0   8   12.24    4.48
  -8   0   8   25.85   13.70
  -5  -6  -8 1950.31  173.04
  -5  -6  -8 1982.45  168.95
  -5  -6  -8 1786.07  153.34
   5  -6   8 1589.60  130.99
   5   6   8 1729.87  149.75
   5  -6   8 1750.37  151.18
  -8   0  -8 1378.22  115.74
  -8   0  -8 1602.70  140.36
  -8   0  -8 1512.15  136.76
   8   0   8 1691.07  149.86
   8   0   8 1282.60  109.98
  -5  -4  13  373.60   62.78
  -5  -4  13  516.73   70.20
   5  -4 -13  441.68   55.29
  -5   4  13  452.51   66.78
   5   4 -13  462.34   56.34
   0   4  17  267.24   34.08
   0  -4  17  338.80   66.48
   0  -4  17  379.66   62.50
   0   4 -17  269.37   40.55
   0  -4  17  340.08   46.86
   0  -4 -17  385.51   52.28
   3   1 -18  277.72   56.06
   3  -1 -18  359.19   51.27
  -3   1  18  257.41   51.91
  -3  -1  18  236.16   69.56
  -3  -1  18  291.43   41.06
  -3   1  18  239.91   29.99
  -3  -1 -18   26.13   10.94
   3   1  18    7.16   10.31
  -3   1 -18   -6.17   12.32
   3  -1  18    1.49   19.92
  -5  -4 -13   16.17   11.20
  -5  -4 -13   25.61   20.93
   5   4  13   39.81   13.51
  -5  -4 -13    4.77    5.46
   5  -4  13    8.77    7.38
  -1  -8   6    2.98    2.13
  -1  -8   6    0.04    2.08
   1  -8  -6    3.12    4.40
  -1  -8   6   15.47   12.25
   1  -8  -6    8.33    7.49
  -1   8  -6  271.94   46.87
   1  -8   6  404.33   48.98
  -1  -8  -6  472.25   66.97
   1  -8   6  374.53   85.72
  -1  -8  -6  317.25   71.20
  -1  -8  -6  433.13   60.42
  -6   1  14    9.52   10.17
   6  -1 -14   15.66    9.53
  -6  -1  14    4.74    5.22
  -6  -1  14   24.81   11.60
  -6   1  14    1.57    5.42
   6  -1 -14   -0.15    2.28
   2  -7 -10  101.29   21.00
   2  -7 -10  101.38   26.71
   2  -7 -10   68.64   18.84
  -2  -7  10  100.37   28.30
  -2  -5  15  253.74   44.41
  -2  -5  15  342.78   54.93
   2  -5 -15  321.76   41.39
  -2   5  15  312.83   60.44
   2  -7  10  416.32   50.70
  -2  -7 -10  450.04   85.37
  -2  -7 -10  448.96   24.13
   2  -7  10  382.12   52.36
   2  -7  10  452.86  112.94
  -2  -7 -10  449.72   90.48
   2   5  15 2004.85  171.52
  -2   5 -15 1520.48  130.02
   2  -5  15 2021.85  170.15
  -2  -5 -15 1703.45  140.62
  -2  -5 -15 1956.01  181.48
  -2  -5 -15 1754.69  149.90
  -2  -5 -15 1959.43  168.51
   2  -5  15 1869.74  161.64
   2  -5  15 1884.55  158.28
  -3   6  12 1253.06  112.18
   3  -6 -12 1224.24  107.53
  -3  -6  12 1260.09  109.58
   7  -5  -3  273.94   67.23
   7   5  -3  182.22   24.27
  -7  -5   3  216.91   43.05
  -7   5   3  205.80   44.87
   7  -5  -3  171.82   28.74
   7  -5  -3  144.62   30.92
  -6  -1 -14 1224.21  107.24
  -6  -1 -14 1279.26  133.91
  -6   1 -14 1311.20  117.89
   6  -1  14 1169.88  106.08
   6   1  14 1118.22  115.58
  -6   1 -14 1270.39  112.51
  -6  -1 -14 1322.69  117.24
   3  -6  12  462.23   71.53
  -3  -6 -12  414.80   52.37
   3  -6  12  234.96   46.41
   3  -6  12  387.44   46.54
  -3  -6 -12  324.91   63.71
   3   6  12  410.43   62.73
  -3  -6 -12  342.48   42.09
   3  -6  12  404.50   52.52
   7  -5   3    3.95    2.82
   7   5   3    1.16    5.44
  -7   5  -3    0.80    4.73
   7  -5   3    4.17   10.89
  -7  -5  -3   19.77   11.65
  -7  -5  -3   13.31   12.14
   5  -7   0    6.68   10.63
  -5  -7   0   10.19   12.21
   5  -7   0   26.80   19.94
   5   7   0    3.66    4.49
  -5  -7   0   14.50   30.17
   5  -7   0   10.60    8.33
  -2  -6  13 1592.42  160.93
   2  -6 -13 1419.66  124.13
  -2  -6  13 1490.93  142.47
   2  -6 -13 1268.82  103.67
  -1   3  18 1042.36   88.67
  -1  -3  18 1156.69  124.27
   1  -3 -18 1331.44  115.78
   1   3 -18 1084.06   92.15
  -1  -3  18 1333.39  129.81
   1   3 -18 1466.87  125.83
   2   6  13  317.56   78.89
  -2  -6 -13  359.27   56.65
   2  -6  13  341.88   42.21
  -2  -6 -13  335.44   40.26
   2  -6  13  329.59   65.13
   2  -6  13  486.51   63.72
  -2  -6 -13  360.15   52.94
   1  -3  18   -0.33    7.38
   1  -3  18   18.72   11.15
   1   3  18   19.66   13.05
   1  -3  18   -1.19    8.45
  -1  -3 -18    4.55    8.53
  -1   3 -18   -3.43   15.23
   4  -5 -13  239.91   38.17
  -4  -5  13  289.20   63.81
  -4  -5  13  263.34   67.07
  -4   5  13  245.34   61.24
   0  -7  11  677.20   97.15
   0  -7  11  559.04   76.71
   0  -7 -11  790.82   99.16
   0  -7 -11  869.45  106.90
   0   7  11  548.30   81.02
   5   0 -16   13.87    5.10
  -5   0  16    4.35    4.16
  -5   0  16   12.70   11.47
  -5  -7   1   73.38   22.14
  -5  -7   1   73.05   22.91
   5  -7  -1   40.31   16.29
   5   7  -1   81.29   24.16
   5  -7  -1  105.14   29.93
   5  -7  -1   97.61   31.93
   5   7   1  244.57   50.78
   5  -7   1  311.25   76.37
  -5  -7  -1  333.77   52.45
   5  -7   1  305.30   67.65
  -5  -7  -1  365.73   49.85
   4  -5  13  308.12   59.83
  -4  -5 -13  282.03   77.13
   4   5  13  338.03   79.82
  -4  -5 -13  299.93   65.40
  -4  -5 -13  352.33   68.13
   4  -5  13  286.66   54.34
  -3  -8   0  576.15  105.85
   3  -8   0  521.45   69.78
   3  -8   0  586.62   80.17
  -3  -8   0  563.60   74.67
  -6  -6   4   29.50    9.87
  -6  -6   4   36.31   12.07
   6  -6  -4   31.37    9.48
   6  -6  -4   12.59   14.14
   6   6  -4   34.34    9.41
  -6  -6  -4    6.56   15.24
   6  -6   4    8.35    9.31
   6  -6   4    3.17    1.46
  -6  -6  -4   21.97    8.98
   6   6   4    1.23   13.55
  -5   0 -16    3.89    6.22
   5   0  16   19.73   18.09
  -5   0 -16   15.79    6.16
  -5   0 -16    7.99   13.07
  -8  -1   8 1548.47  129.18
   8  -1  -8 1731.37  153.59
  -8   1   8 1664.93  137.38
  -8  -1   8 1687.95  145.81
   8   1  -8 1591.48  136.69
  -8   1   8 1746.36  149.76
   1  -4 -17  140.07   23.89
  -1   4  17  121.98   18.89
  -1  -4  17  131.81   36.54
   1   4 -17  102.13   15.88
  -1  -4  17  224.11   51.26
  -6   4  11 1605.63  146.67
   6   4 -11 1590.17  135.09
  -6  -4  11 1652.68  151.81
   6  -4 -11 1538.61  130.68
  -6   4  11 1499.79  128.94
   1  -4  17  291.45   68.61
   1   4  17  393.54   86.10
   1  -4  17  348.23   80.11
   1  -4  17  241.60   31.53
  -1   4 -17  168.70   35.57
  -1  -4 -17  236.04   63.65
   1   4  17  190.21   40.61
  -2  -8   5  141.76   27.21
   2  -8  -5  118.78   16.92
  -2  -8   5   81.12   20.09
   2  -8  -5  132.63   34.27
   7   2 -11  928.84  111.09
  -7   2  11  843.23  107.10
  -7   2  11  761.06   99.48
   7  -2 -11  756.35   92.19
  -7  -2  11  929.71  112.97
  -7   2  11 1022.27   94.18
   7  -2 -11  891.71  110.64
  -8   1  -8   94.37   37.99
  -8  -1  -8  154.72   51.07
  -8  -1  -8  124.61   23.78
   8  -1   8   82.81   12.12
   8  -1   8   60.16   17.69
   8   1   8  129.76   23.25
  -8   1  -8   78.76   23.07
  -8  -1  -8  128.43   23.30
   8   1   8   88.39   18.46
  -8   1  -8  132.08   25.97
  -3  -8   1   33.68   13.56
   3  -8  -1   50.34   22.57
   3  -8  -1   72.18   20.05
  -3  -8   1   94.97   38.14
  -2  -8  -5  238.94   50.33
  -2  -8  -5  213.63   32.62
  -2  -8  -5  306.68   79.09
   2  -8   5  205.79   41.08
   2  -8   5  216.66   41.10
  -3  -8  -1 1329.62  115.60
  -3  -8  -1 1387.96  125.26
   3  -8   1 1407.13  136.30
  -8   2   7  369.74   42.74
  -8   2   7  330.26   51.43
  -8  -2   7  316.73   47.54
   8  -2  -7  330.39   37.47
   8  -2  -7  512.95   84.62
   8   2  -7  387.01   57.34
  -8  -2   7  455.27   70.56
   6  -4  11  281.92   52.42
  -6  -4 -11  325.11   68.36
   6   4  11  354.10   89.40
  -6  -4 -11  262.18   39.25
  -6  -4 -11  348.67   80.25
  -7   2 -11  159.31   33.84
  -7  -2 -11  161.05   45.12
  -7  -2 -11   82.97   13.35
  -7   2 -11  116.33   24.45
  -7  -2 -11   98.10   35.24
   7   2  11  123.82   30.78
   7  -2  11  132.28   30.07
  -7  -2 -11  150.10   31.01
   8   2   7  214.03   59.21
  -8   2  -7  174.63   43.73
  -8  -2  -7  185.00   36.87
   8  -2   7  176.62   33.03
   8  -2   7  163.69   26.19
  -8   2  -7  148.66   41.53
  -8  -2  -7  222.95   31.82
  -3  -3  17  576.04   77.64
  -3  -3  17  675.61   86.04
  -3   3  17  693.17   85.95
   3   3 -17  595.99   72.74
   3  -3 -17  725.02   96.96
   5   7  -2 1669.65  151.61
   5  -7  -2 1894.32  165.42
  -5  -7   2 1610.69  134.79
  -5  -7   2 1930.92  165.03
   5  -7  -2 1795.35  162.07
   3  -7  -9  101.69   17.00
  -3   7   9   67.87   21.83
  -3   7   9  110.20   26.82
   3  -7  -9   87.26   17.45
   3  -7  -9  106.01   29.85
  -3  -7   9  195.46   62.16
   5  -7   2  520.95   98.05
   5  -7   2  464.49   64.96
  -5  -7  -2  553.62   72.79
  -5  -7  -2  471.11   72.62
   5   7   2  476.79   69.19
  -3  -3 -17  224.38   29.51
  -3  -3 -17  238.40   41.10
  -3   3 -17  232.60   49.38
   3   3  17  282.89   58.40
   3  -3  17  260.01   54.37
   3  -7   9   15.65    6.06
  -3  -7  -9    0.43   10.34
   3  -7   9    6.51    3.81
  -3  -7  -9   34.81   11.38
   3  -7   9   11.48    3.97
   3  -7   9   -2.71   16.71
  -3  -7  -9    1.08   10.09
   3   7   9   16.11   12.66
  -7   0  12    1.28    4.15
   7   0 -12    1.30    5.80
   7   0 -12    5.87   15.37
  -8   3   5 1358.14  118.53
   8  -3  -5 1537.74  143.87
   8   3  -5 1528.04  136.37
  -8  -3   5 1463.60  133.76
  -8  -3   5 1253.77  107.80
   8  -3  -5 1319.64  107.41
  -4  -3  16  111.04   32.31
  -4  -3  16   56.93   18.65
   4   3 -16   52.13   15.33
   4  -3 -16  114.84   30.89
  -4   3  16   10.16   12.88
  -8   3  -5   13.81    9.17
  -8  -3  -5    5.08    6.90
   8  -3   5   14.85   15.33
  -8  -3  -5   15.99   24.58
  -8   3  -5    3.93    5.01
   8  -3   5   -0.74    2.04
   8   3   5    5.34    8.32
  -7   0 -12    2.92    8.53
  -7   0 -12    7.73    5.21
   7   0  12    4.28   15.11
  -7   0 -12   44.41   20.15
  -4  -3 -16   13.69    9.53
   4  -3  16   14.94   12.18
  -4  -3 -16   32.02   11.94
  -4   3 -16   10.76    6.92
   4   3  16   -0.93   10.73
  -4  -3 -16   15.77   15.14
   2   0 -19   20.43   12.50
  -2   0  19   -2.76   12.13
  -2   0  19    7.52    4.74
   3  -8  -2  389.67   84.95
   3  -8  -2  350.58   47.68
  -3  -8   2  393.70   91.24
  -3  -8   2  323.05   51.77
   3  -8   2    9.64    9.82
   3  -8   2   12.28    5.51
  -3  -8  -2    5.92    8.97
  -3  -8  -2   11.66    7.59
  -2   0 -19    6.11   12.65
   2   0  19   12.43    7.57
  -1  -7  11  160.83   33.56
  -1   7  11   83.95   13.14
   1  -7 -11  112.95   45.07
   1  -7 -11  174.83   26.37
   4  -7  -7  156.87   26.38
  -4   7   7  176.59   36.35
   4  -7  -7  198.22   31.97
  -4   7   7  105.29   19.55
  -4  -7   7  138.73   29.78
   4  -7  -7   93.64   18.31
   1  -7  11  192.89   24.80
   1  -7  11  236.18   44.22
  -1  -7 -11  241.93   45.59
  -1  -7 -11  276.05   41.06
  -1  -7 -11  213.99   56.52
   1  -7  11  331.30   76.56
   4   7   7   94.56   24.61
  -4  -7  -7  145.92   31.50
   4  -7   7  111.96   28.97
  -4  -7  -7   99.05   32.69
  -4  -7  -7  132.79   31.48
   4  -7   7  135.00   29.05
  -5  -1  16    2.41    2.37
  -5   1  16    8.00    5.21
   5   1 -16   10.38   16.70
  -5   1  16   21.96   10.23
  -5  -1  16   10.91   12.92
   7  -5  -4   14.24    8.24
  -7   5   4   59.54   16.87
   7  -5  -4   11.26   11.08
   7  -5  -4   26.98    9.42
   7   5  -4   29.66   18.26
  -7  -5   4   59.07   17.01
   5   1  16  646.16   97.22
   5  -1  16  805.33  120.07
  -5  -1 -16  733.88  102.99
  -5   1 -16  798.22   97.36
  -5  -1 -16  685.20   87.47
  -5  -1 -16  653.62   84.04
   7  -5   4   47.84   54.86
  -7  -5  -4   39.06   24.77
  -7  -5  -4   33.58   13.02
   7  -5   4   15.59    7.11
   7   5   4   58.36   23.55
  -7   5  -4   52.26   17.40
   0   2  19   40.69   17.59
   0  -2 -19   60.35   20.76
   0   2 -19    9.25    9.86
   0  -2  19   92.10   18.48
   0  -2  19   64.38   23.34
   0  -2  19   56.37   31.29
   0  -8   7    0.76    2.75
   0  -8   7    7.31    9.79
   0  -8  -7   10.05    6.63
   0  -8  -7    7.54   11.59
   0  -8  -7   -3.03    5.65
   0   8  -7    3.95    5.53
  -7   3  10   66.34   18.25
   7   3 -10   38.19   21.81
   7  -3 -10   40.89   11.70
  -7  -3  10   45.35   15.51
   7  -3 -10   19.32    6.06
  -7   3  10   30.16    8.21
  -7   3  10   87.43   20.11
   3  -4 -16    5.56   12.32
   3   4 -16    3.21    2.38
  -3  -4  16    5.90    9.62
  -3   4  16   35.65   13.75
  -3  -4  16   18.13   14.81
   7  -4  -8  549.91   68.24
   7  -4  -8  394.60   51.60
  -7  -4   8  611.71   78.58
   7   4  -8  648.70   79.81
  -7   4   8  523.73   64.93
  -3  -4 -16  110.82   18.34
   3  -4  16   74.31   18.46
  -3  -4 -16  144.70   34.30
   3   4  16   81.51   32.11
  -3  -4 -16   71.34   36.78
   3  -4  16   88.04   31.01
  -3  -4 -16   94.77   19.77
  -7   3 -10  123.29   46.92
  -7  -3 -10  154.31   40.38
  -7  -3 -10  103.19   24.47
   7   3  10  155.24   38.73
   7  -3  10   77.08   50.64
  -7  -3 -10   89.55   19.40
  -7   3 -10  125.08   35.10
  -7   4  -8  900.48  109.63
   7   4   8  835.55  114.29
  -7  -4  -8 1019.33  100.19
   7  -4   8  837.27  105.71
   7  -4   8  804.53  100.49
  -7  -4  -8  977.37   42.50
   0  -6  14    4.13    8.99
   0  -6  14   22.07   15.05
   0  -6 -14    2.00    3.55
   0  -6 -14   18.89   10.30
   0  -6 -14    0.04    1.69
   0   6  14    4.12    4.08
  -6   5   9 1069.00   98.15
   6  -5  -9  874.18  103.99
   6  -5  -9  931.59  119.45
  -6  -5   9 1080.96   94.92
   6   5  -9  881.15  106.32
   5  -7  -3    8.76    8.12
  -5  -7   3    6.26    3.92
  -5  -7   3    6.11    7.62
   5  -7  -3    3.61    8.70
  -5  -7  -3   69.05   28.09
   5  -7   3   81.86   27.76
   5  -7   3  100.52   21.26
   5   7   3  120.50   37.39
  -5  -7  -3  129.81   33.70
  -6  -5  -9  133.80   46.43
  -6  -5  -9  184.45   38.93
   6  -5   9  144.60   26.45
   6   5   9  147.77   26.31
  -6  -5  -9  209.73   35.59
   7   1 -12  176.39   36.52
  -7   1  12  156.97   22.75
  -7  -1  12  183.51   23.54
   7  -1 -12  123.00   27.84
  -7   1  12  220.83   42.06
   7  -1 -12  189.03   34.34
  -4  -4  15   89.62   38.17
   4  -4 -15   61.09   32.34
   4   4 -15   52.36   13.06
   4   4 -15   82.26   15.89
  -4  -4  15  123.11   32.52
  -4   4  15   26.57   15.62
   4  -6 -11  297.09   44.85
  -4   6  11  238.09   48.64
  -4  -6  11  264.69   49.93
  -7   1 -12   40.43   13.62
  -7  -1 -12   34.68   10.89
   7  -1  12   18.81   14.66
  -7   1 -12   84.04   22.37
  -7  -1 -12   60.20   19.49
  -7  -1 -12   32.50   14.92
  -7   1 -12   25.41    9.31
   7   1  12   37.73   17.50
  -3  -8   3  856.72  108.60
   3  -8  -3 1198.64  136.12
  -3  -8   3 1061.05  102.18
   3  -8  -3 1250.49  132.16
  -3  -8  -3  185.79   38.73
   3  -8   3  223.32   45.23
  -3  -8  -3  126.57   36.54
   3  -8   3  159.59   25.58
  -6  -6   5 1424.48  123.94
   6  -6  -5 1269.69  108.13
   6   6  -5 1261.09  113.26
   6  -6  -5 1238.17  122.65
  -6  -6   5 1052.86   93.20
   6  -6  -5  995.36   88.37
  -2  -1  19  303.57   54.33
   2   1 -19  340.65   46.28
  -2  -1  19  329.84   77.84
  -2   1  19  365.29   46.56
   2  -1 -19  363.26   45.76
  -2   1  19  284.18   64.77
   4  -6  11  341.65   46.34
  -4  -6 -11  441.12   56.91
   4  -6  11  443.73  101.09
   4   6  11  429.20   73.38
   4  -6  11  373.98   52.85
   4  -6  11  324.03   63.25
  -4  -6 -11  445.37   53.67
  -4  -6 -11  311.57   47.48
  -4  -4 -15  207.95   59.95
  -4  -4 -15  302.87   56.41
   4  -4  15  289.86   35.83
  -4  -4 -15  280.41   71.34
   4   4  15  304.63   78.64
  -4  -4 -15  236.31   44.19
   6  -6   5   42.83   13.43
  -6  -6  -5   19.76   15.66
   6   6   5   19.66   16.48
  -6  -6  -5   21.65    8.61
   2   1  19  229.96   40.92
  -2   1 -19  164.94   43.56
  -2  -1 -19  180.54   43.71
   2  -1  19  204.64   31.42
   0  -5 -16   58.80   18.27
   0   5 -16   27.49    7.78
   0  -5  16   -3.22   13.45
   0   5  16   40.48   21.36
   0  -5  16    9.45    6.97
   0  -5  16   42.11   14.39
   4  -2 -17  148.65   25.18
   4   2 -17  172.07   43.81
  -4   2  17  107.38   39.99
  -4  -2  17  105.56   30.05
  -4  -2  17  155.56   47.55
  -1   2  19 1065.48   88.19
   1  -2 -19 1310.73  130.87
  -1  -2  19 1303.17  112.69
  -1  -2  19 1236.46  108.31
  -1   2  19 1037.78   89.41
  -1   2  19 1144.97  129.74
  -1   2  19 1175.68  103.72
   1   2 -19 1261.58  112.16
   1  -2  19 1692.41  146.80
   1  -2  19 1605.62  190.20
  -1   2 -19 1445.78  124.28
   1   2  19 1588.45  150.31
  -1  -2 -19 1589.60  155.92
  -1  -8   7  218.01   23.41
  -1  -8   7  307.82   79.74
   1  -8  -7  224.45   47.61
  -1  -8   7  225.49   21.93
   1  -8  -7  197.02   45.08
  -1  -8  -7 1319.44  120.85
  -1  -8  -7 1307.14  114.59
  -1  -8  -7 1134.90  105.05
   1  -8   7 1159.26   99.99
   1  -8   7 1321.14  115.47
  -4  -2 -17   62.15   39.78
  -4  -2 -17   97.78   42.50
  -4   2 -17   33.04   20.00
  -4  -2 -17  116.60   38.35
   4  -2  17  112.28   25.03
   4   2  17   70.27   50.05
  -3  -2  18   55.07   20.44
  -3   2  18    5.28    2.90
   3   2 -18   40.41   17.34
  -3   2  18   14.15    3.47
  -3   2  18    9.46   14.44
  -3   2  18   26.31    7.37
   3  -2 -18   39.06   19.65
  -3  -2  18    3.35    5.39
   1  -6 -14  713.70   89.10
  -1  -6  14  696.36   90.81
  -1  -6  14  789.32  102.91
   1  -6 -14  655.03   79.49
  -1   6  14  580.18   76.41
  -2  -8   6  775.88  110.02
   2  -8  -6  955.20  130.65
   2  -8  -6  919.72  127.15
  -2  -8   6  824.16   96.70
   1  -6  14  154.72   45.13
  -1  -6 -14  219.32   25.08
  -1  -6 -14  179.35   31.06
  -1  -6 -14  169.88   32.97
   1  -6  14  133.09   22.96
   1  -6  14  181.83   41.43
   2  -8   6   35.98   17.41
  -2  -8  -6    2.38    9.58
  -2  -8  -6   24.79   15.12
   2  -8   6   24.52   13.72
  -2  -8  -6   14.90    6.20
  -3  -2 -18  104.04   41.68
   3   2  18  106.68   31.57
   3  -2  18  153.13   34.49
  -3   2 -18  126.76   32.14
   5  -6  -9   40.41   16.63
   5  -6  -9   60.10   13.59
  -5  -6   9   80.14   23.52
   5   6  -9   26.89    8.24
  -5   6   9   47.18   15.72
  -8   0   9    3.05    2.72
  -8   0   9    0.72    6.96
   8   0  -9   17.43   13.34
  -6  -3  13  180.86   46.58
   6   3 -13  162.23   35.58
   6  -3 -13  222.55   48.79
  -6   3  13  246.59   68.04
  -5  -6  -9   62.32   22.25
  -5  -6  -9   80.33   23.91
   5  -6   9   43.49   13.14
   5  -6   9   44.83   19.32
  -5  -6  -9   56.88   22.66
   5   6   9   85.91   25.67
  -8   0  -9    6.20    3.04
  -8   0  -9   -1.67   11.29
  -8   0  -9    5.91    9.30
   8   0   9   35.68   12.10
   8   0   9    1.42    4.27
  -6  -3 -13  342.34   74.60
  -6  -3 -13  339.57   71.82
   6   3  13  268.77   78.84
   6  -3  13  333.37   47.67
  -6  -3 -13  333.25   49.58
  -6  -3 -13  268.60   38.29
  -9   0   0   21.92   17.28
   9   0   0   -1.89   10.11
  -6   2  14 1665.76  168.72
   6  -2 -14 1686.53  148.29
  -6   2  14 1576.66  129.74
   6  -2 -14 1614.18  131.95
  -6  -2  14 1752.47  148.07
   6   2 -14 1907.26  161.21
  -6  -2  14 2029.94  172.17
   2   3 -18  163.37   26.16
  -2  -3  18  343.91   80.06
  -2   3  18  282.78   94.93
   2  -3 -18  322.39   41.56
  -2   3  18  241.00   14.00
  -2   3  18  201.92   26.51
  -2  -3  18  228.88   54.50
   2  -3  18  440.17   95.52
  -2   3 -18  412.41   53.37
  -2  -3 -18  453.70  100.55
   2  -3  18  413.85   73.74
   2   3  18  501.60   68.30
   6   2  14   14.16    8.61
  -6  -2 -14    0.37   10.95
  -6   2 -14   19.69    8.72
  -6  -2 -14   13.27   12.30
  -6   2 -14    1.98    6.37
  -6  -2 -14    8.92   13.79
   6  -2  14   13.86    9.53
  -8   3   6  158.86   32.30
   8  -3  -6  109.80   20.86
  -8  -3   6   99.10   24.33
   8  -3  -6  121.29   27.21
  -8  -3   6  155.26   47.26
   8   3  -6  149.41   36.47
  -9   0   1  127.99   32.21
   9   0  -1  165.98   61.71
  -9   0  -1 3252.11  273.06
   9   0   1 3560.22   67.57
   7  -5  -5   66.28   29.21
   7  -5  -5   24.85    9.51
  -7  -5   5   16.99   10.47
  -7   5   5   17.99   12.49
   7  -5  -5   23.03   10.68
   7   5  -5   10.21    6.40
   7  -5  -5    7.14    6.89
   8   3   6  479.76  103.66
   8  -3   6  417.78   59.35
  -8   3  -6  415.88   76.19
  -8  -3  -6  234.30   63.03
  -8  -3  -6  428.90   57.81
  -8   3  -6  347.96   65.07
   8  -3   6  245.25   33.11
  -7  -5  -5   58.43   21.22
   7   5   5   68.03   21.09
   7  -5   5   34.94   15.73
  -7  -5  -5   88.57   16.91
   7  -5   5  106.24   29.18
  -7   5  -5   49.96   15.87
  -1  -5  16   38.30   19.93
   1  -5 -16   57.49   18.26
   1   5 -16   28.28    8.20
  -1  -5  16   73.99   27.78
  -1   5  16   31.14    8.93
  -1  -5 -16  139.89   19.91
  -1  -5 -16  162.27   29.92
   1  -5  16  199.51   30.85
   1  -5  16  226.30   52.36
   1   5  16  154.00   26.95
   1  -5  16  185.45   63.44
  -1   5 -16  159.75   26.47
  -1  -5 -16  280.11   43.23
   8   4   0  268.57   64.37
  -8  -4   0  286.92   65.45
   8  -4   0  212.24   23.13
  -8   4   0  205.57   41.83
  -8  -4   0  218.40   44.42
   8  -4   0  127.89   32.80
   8  -4   0  283.51   57.51
   5  -7  -4  399.72   54.06
  -5  -7   4  216.01   42.31
  -5  -7   4  297.19   54.78
   5   7  -4  304.64   53.07
   5  -7  -4  313.06   53.02
   5  -7   4  287.59   57.03
  -5  -7  -4  250.03   58.16
   5   7   4  320.72   69.65
   5  -7   4  257.25   48.28
  -5  -7  -4  223.65   31.70
  -2  -4  17  128.52   23.91
  -2  -4  17   96.92   36.22
   2  -4 -17   71.55   27.47
   2   4 -17   55.65   13.10
  -2   4  17   25.11   15.20
  -2  -4 -17  447.44   61.41
   2  -4  17  429.01   53.94
  -2  -4 -17  379.61   52.42
   2   4  17  478.20   94.36
   2  -4  17  457.86   67.95
   2  -4  17  396.36   73.02
  -5  -3  15   83.15   19.06
   5   3 -15   45.61   19.13
   5  -3 -15   52.13   23.67
  -5   3  15   66.50   20.32
  -5  -3  15   28.92   21.00
   5   3 -15   52.18   14.87
   8  -4  -1  452.96   54.72
  -8  -4   1  634.89   77.03
   8  -4  -1  548.65   64.49
   8  -4  -1  595.88   79.52
  -8   4   1  531.70   67.05
   8   4  -1  551.85   68.53
  -8  -4   1  647.47   87.99
   8  -4   1    7.85    3.09
   8  -4   1    6.10    7.90
   8  -4   1    1.62    3.03
  -8  -4  -1   24.45    9.50
  -8  -4  -1   18.56   10.16
  -8   4  -1   17.70    9.77
   8  -4   1   12.07   11.11
   8   4   1   37.43   17.04
   3  -8  -4   46.17   23.12
  -3  -8   4   42.69   10.58
   3  -8  -4   16.31   13.90
  -3   8   4   20.48    5.22
  -3  -8   4   52.18   15.68
  -3  -8  -4  586.38   85.61
  -3  -8  -4  542.48   80.35
   3  -8   4  448.67   44.06
   3  -8   4  426.58   68.25
  -5  -3 -15   46.69   16.94
  -5  -3 -15   55.60   22.46
   5   3  15   32.53   17.50
   5  -3  15   68.92   27.55
  -5  -3 -15   36.61   11.66
  -5  -3 -15   52.00   20.65
  -8   2   8  706.93   88.25
  -8  -2   8  815.98   98.99
  -8   2   8  750.79   89.21
   8   2  -8  813.07  102.73
  -8  -2   8  623.94   91.52
   8  -2  -8  780.64   93.51
   8  -2  -8  832.79  107.75
   8   2   8  779.80   98.81
   8  -2   8  763.97  107.85
  -8  -2  -8  621.67   78.42
   8  -2   8  582.99   75.99
  -8  -2  -8  896.17  151.73
  -8   2  -8  716.48   88.98
   8   2   8  554.00   71.51
  -8   2  -8  658.83   95.10
   9   0  -2   23.90   15.08
  -9   0   2   -4.28    9.69
  -9   0  -2   13.19   11.45
   9   0   2    9.04    6.07
  -8  -1   9  329.61   45.83
  -8  -1   9  247.77   37.76
  -8   1   9  316.12   40.45
   8  -1  -9  281.70   78.26
  -8   1   9  289.51   43.75
  -5  -5  12  112.84   31.43
   5   5 -12   85.62   13.32
   5  -5 -12   85.44   26.91
  -5   5  12   73.74   31.01
  -8  -1  -9  256.26   46.05
   8  -1   9  214.55   34.61
   8   1   9  223.84   32.26
  -8   1  -9  261.74   66.05
  -8  -1  -9  366.51   71.01
  -8  -1  -9  211.26   84.85
  -8   1  -9  352.67   79.04
  -8  -1  -9  294.83   41.22
   8   1   9  307.98   86.47
   8  -1   9  393.44   76.88
  -8   1  -9  288.10   40.15
  -5  -5 -12 1564.49  137.21
  -5  -5 -12 1731.58  151.59
   5   5  12 1382.03  123.81
  -5  -5 -12 1558.32  155.77
   5  -5  12 1587.40  146.78
  -9  -1   0   70.60   40.76
   9  -1   0   64.54   34.55
  -9   1   0   66.49   26.56
   9   1   0  106.98   37.25
   8   4  -2   44.23   18.70
   8  -4  -2   81.89   29.27
  -8   4   2   91.52   25.55
   8  -4  -2   74.01   18.63
  -8  -4   2   99.63   14.60
  -8  -4   2  144.41   30.47
   8  -4   2   19.06    9.15
  -8  -4  -2   24.40    9.73
   8   4   2    7.01    8.80
  -8   4  -2   57.78   25.34
   8  -4   2   90.11   42.20
   8  -4   2   20.35    8.94
  -8  -4  -2   71.09   28.68
   2  -7 -11 1424.87   98.44
   2  -7 -11 1642.97  117.93
   2  -7 -11 1670.14  123.28
  -2  -7  11 1535.01  117.92
   2  -7  11   16.55    5.32
  -2  -7 -11    7.41    6.73
   2  -7  11   12.35    6.76
  -2  -7 -11    7.89    7.24
  -2  -7 -11    2.70    7.44
   2  -7  11    1.42    2.30
   9  -1  -1  965.88  102.88
  -9   1   1 1010.05  105.54
  -9  -1   1  954.87  100.24
   9   1  -1  844.00   90.34
   9   1   1  168.12   62.98
  -9   1  -1  123.18   28.22
   9  -1   1  131.75   38.18
  -9  -1  -1  186.63   48.14
  -9   1  -1  222.54   70.68
   4  -7  -8   61.39   20.14
  -4  -7   8   54.47   18.96
   4  -7  -8   46.27   11.31
  -4   7   8   23.90    5.95
  -4   7   8   19.30    7.35
  -4  -7  -8   86.15   27.83
   4  -7   8   37.55    7.74
   4  -7   8   39.01   12.73
   4   7   8   51.16   24.18
   4  -7   8   76.13   26.86
  -4  -7  -8   61.94   20.21
  -4  -7  -8   46.53   22.12
   6  -6  -6   40.22   10.10
   6  -6  -6   57.42   13.94
   6   6  -6   23.09    6.34
  -6  -6   6   24.97    8.33
   6  -6  -6   66.10   21.12
  -6  -6   6   49.76   28.41
   6   6   6  107.36   24.35
  -6  -6  -6  114.59   33.96
  -6  -6  -6  109.28   32.47
   6  -6   6  131.59   44.84
  -5   2  16   13.38   13.81
  -5  -2  16   12.13    4.20
  -5  -2  16    4.81    4.48
   5  -2 -16    2.55    8.62
   0  -8  -8  789.62   97.03
   0  -8  -8  859.88  114.95
   0   8  -8  506.20   75.38
   0  -8   8  536.67   64.08
   0  -8   8  701.26   69.45
   0  -8  -8  805.94   82.64
   0  -8   8  789.89   85.78
  -5   2 -16  261.01   57.88
  -5  -2 -16  277.63   63.60
  -5  -2 -16  141.55   56.05
  -5  -2 -16  217.20   41.73
   5  -2  16  203.96   65.96
   5   2  16  286.97   59.86
   6   0 -15   15.72    5.47
  -6   0  15    3.66    8.62
  -6   0  15   11.10    8.06
   6   0 -15    2.22    3.62
  -3   7  10  809.06   85.03
   3  -7 -10  867.19   99.88
  -3  -7  10  867.56  111.80
   3  -7 -10  740.43   75.91
  -3  -5  15  120.13   34.34
  -3  -5  15   71.56   22.56
  -3   5  15   95.85   22.55
   3  -5 -15   91.90   27.26
   3  -7  10 2176.71  195.99
   3   7  10 1951.19  153.25
  -3  -7 -10 2240.95  163.96
   3  -7  10 1960.08  140.25
  -3  -7 -10 2218.75  167.40
   3  -7  10 1965.96  138.22
   3  -7  10 1968.99  141.68
  -9   0   3 1659.17  125.45
   9   0  -3 1770.34  138.67
  -6   0 -15    7.45    6.35
  -6   0 -15   10.48   10.03
   6   0  15   17.90   13.99
  -6   0 -15   12.82   14.88
   3  -5  15   20.46   12.77
  -3  -5 -15   32.82   15.48
   3  -5  15   47.45   13.49
   3   5  15   21.53   14.09
  -3  -5 -15   63.43   24.02
  -3  -5 -15   49.10   17.36
  -3  -5 -15   42.10   14.48
   3  -5  15   33.54   12.82
   9   0   3 1221.66  123.77
  -9   0  -3 1302.04  113.71
   9  -1  -2   15.17    9.68
  -9   1   2   16.31    7.63
  -9  -1   2   44.58   17.26
   9   1  -2   80.93   36.29
   9  -1   2  328.76   60.17
   9   1   2  300.19   87.17
  -9  -1  -2  387.23   64.67
  -9   1  -2  349.85   84.75
  -9  -1  -2  276.70   38.97
  -9   1  -2  385.97   51.54
   0  -7 -12    7.92   15.43
   0  -7  12   16.90   10.55
   0  -7  12   -3.10   14.97
   0   7  12    8.21    4.68
   0  -7 -12   14.55    8.36
   5  -4 -14   75.25   22.21
   5   4 -14   48.36   11.68
  -5  -4  14   64.62   19.20
  -5   4  14   72.65   31.57
   5   4 -14   64.25   15.73
  -5  -4  14   47.52   14.57
  -3  -6  13   21.34    9.41
  -3   6  13   22.02   10.19
  -3  -6  13   95.71   26.95
   3  -6 -13   11.72   18.71
   7   4  -9    6.81    5.14
   7  -4  -9    4.55    3.22
  -7  -4   9    5.07   13.46
   7  -4  -9    9.40    6.52
  -7   4   9   -3.34    7.05
   3  -6  13    4.41   12.61
  -3  -6 -13   32.54   21.21
  -3  -6 -13   23.69   15.12
   3  -6  13    6.04    6.56
  -3  -6 -13   12.98    8.44
   3   6  13   21.58   15.94
   3  -6  13    5.66    5.98
  -5  -4 -14  811.19  103.05
   5  -4  14  793.17  100.06
  -5  -4 -14  843.37   91.28
   5   4  14  707.21  134.40
  -5  -4 -14  817.89   99.05
  -5  -4 -14  886.92   97.85
   8  -4  -3  725.91   92.45
   8  -4  -3  594.07   58.59
  -8  -4   3  639.64   84.62
   8   4  -3  547.34   33.55
  -8  -4   3  660.33   70.49
  -8   4   3  570.28   71.93
   0   0  20 1179.14  102.19
   0   0 -20 1091.14   89.46
  -5   7   5   53.71   13.21
  -5  -7   5  101.90   34.00
   5  -7  -5   97.41   21.17
   5   7  -5   77.63   19.68
  -5  -7   5   63.93   16.78
  -8   4  -3 1142.92   87.76
   8   4   3 1271.22   96.00
   8  -4   3 1166.33   83.90
  -8  -4  -3 1331.13  116.64
  -8  -4  -3 1051.26   87.77
   8  -4   3 1087.06  103.31
  -7   4  -9   17.72   10.25
   7  -4   9    3.15   13.40
   7   4   9   38.12   18.50
  -7  -4  -9   37.27   11.80
  -7  -4  -9   13.05    4.79
  -7  -4  -9   25.34   20.98
  -6   4  12  111.79   30.44
   6   4 -12  168.51   32.82
  -6  -4  12  222.66   51.61
   6  -4 -12  169.21   39.74
  -6   4  12  156.58   40.17
   7  -2 -12    7.75    4.51
  -7   2  12   34.93   12.94
  -7   2  12   -0.78    4.05
   7  -2 -12    8.59    9.83
   7   2 -12   22.51   10.50
  -7  -2  12   16.91    4.95
   5  -7   5  305.30   63.01
  -5  -7  -5  366.82   60.32
  -5  -7  -5  348.99   74.08
   5  -7   5  343.22   66.74
   5   7   5  285.65   71.00
  -6  -4 -12  955.21  105.66
   6   4  12 1000.58  126.46
  -6  -4 -12 1006.39  103.09
   6  -4  12  973.84  101.10
  -6  -4 -12  923.97  103.92
  -4   0  18  703.91   83.49
   4   0 -18  603.26   70.99
  -4   0  18  718.19   72.43
   7   2  12   19.38   11.95
  -7   2 -12   13.36   12.06
   7  -2  12   -1.14   11.97
  -7  -2 -12   20.32   14.78
  -7   2 -12   20.30   14.75
  -7  -2 -12   11.37    4.02
  -7   2 -12   13.64   10.96
  -7  -2 -12   22.21   15.04
  -7  -2 -12    3.18    9.02
  -2   2  19  141.82   28.96
  -2   2  19   97.70   18.35
  -2  -2  19  103.58   18.63
  -2   2  19   77.75   40.14
  -2   2  19   76.69   18.19
  -2  -2  19  142.56   37.34
   2   2 -19  208.30   57.89
   2  -2 -19  180.94   39.82
   2  -8  -7  904.04  110.55
   2  -8  -7  926.96  114.12
  -2  -8   7 1027.09   43.87
  -3   8   5  233.33   38.25
  -3  -8   5  277.99   44.14
   3  -8  -5  294.31   60.04
   3  -8  -5  257.98   44.64
   2  -2  19   39.71   13.13
  -2  -2 -19   87.65   30.64
   2   2  19   98.46   21.15
  -2   2 -19   34.80   12.16
  -4   0 -18   74.99   23.44
   4   0  18   99.76   26.57
  -2  -8  -7  300.22   68.13
  -2  -8  -7  218.19   63.78
  -2  -8  -7  308.67   45.28
   2  -8   7  215.67   69.63
   2  -8   7  200.92   41.99
   3  -8   5   -0.25    4.58
   3  -8   5    2.30    5.26
  -3  -8  -5    8.70   10.76
  -3  -8  -5    5.36   11.21
  -3  -8  -5   13.94   10.29
  -7   5   6 1676.74  123.95
   7  -5  -6 1291.41   94.58
   7  -5  -6 1682.32  159.14
  -7  -5   6 1785.29  153.10
   7   5  -6 1644.66  130.09
   7  -5  -6 1210.75  108.29
   7  -5  -6 1600.75  114.06
   1  -8  -8  965.59  105.62
  -1  -8   8  899.40  156.66
   1  -8  -8  979.06  103.86
  -1  -8  -8   96.26   18.53
  -1  -8  -8   73.94   19.53
  -1  -8  -8  166.37   35.41
   1  -8   8  121.17   35.78
   1  -8   8   88.32   21.88
  -7  -5  -6 1148.89   90.84
  -7   5  -6 1135.39   84.04
  -7  -5  -6 1445.91  111.18
   7   5   6 1177.83   92.81
   7  -5   6 1262.01  117.69
  -2  -6  14   -2.10   14.37
   2  -6 -14    9.08    8.33
  -2  -6  14   17.88   10.26
   2  -6  14   16.64    8.33
   2   6  14    1.09    8.45
  -2   6 -14    7.90    4.21
   2  -6  14   18.06    5.57
  -2  -6 -14   17.06   11.00
  -2  -6 -14    8.09    6.77
   2  -6  14   12.55    6.53
  -2  -6 -14    3.04    7.96
  -4   5  14   10.21    5.89
  -4  -5  14   23.47    8.90
   4  -5 -14    5.44    7.83
   4   5 -14    0.47    0.50
  -4  -5  14    8.57   10.53
   6  -5 -10   19.38   10.64
   6   5 -10   14.52    8.32
   6  -5 -10    7.59    1.91
   6  -5 -10    9.55    2.01
  -6  -5  10   13.51   13.71
  -6   1  15   13.17    5.71
   6  -1 -15   19.38   12.29
  -6  -1  15   17.89    8.03
   6  -1 -15   11.65    3.94
  -6   1  15   37.16   23.21
  -6  -1  15    6.79   12.55
  -7  -3  11  891.27  107.39
   7  -3 -11  730.38   80.78
   7   3 -11  983.20  104.52
   7  -3 -11  972.48  103.07
  -7   3  11  963.22  106.55
  -7   3  11  969.28  103.67
   4   5  14  229.71   66.06
  -4  -5 -14  267.69   43.58
  -4  -5 -14  193.14   51.88
  -4  -5 -14  274.56   76.14
   4  -5  14  263.95   55.37
   4  -5  14  248.97   50.92
   8   3  -7  682.05   78.92
  -8  -3   7  644.32   71.95
  -8   3   7  624.78   70.12
   8  -3  -7  548.40   23.40
   6  -5  10   75.17   29.86
   6   5  10   55.74   36.52
  -6  -5 -10   10.24   33.83
  -6  -5 -10   71.48   32.33
  -6  -5 -10   45.73   22.87
  -9   1   3 1168.14   94.43
   9  -1  -3 1017.38  119.63
  -9  -1   3 1065.65   86.38
   9   1  -3 1150.07   91.85
  -6  -1 -15  152.83   41.95
   6   1  15   95.24   54.06
   6  -1  15  147.45   39.53
  -6  -1 -15   47.56   41.28
  -6   1 -15   80.26   38.97
  -6   1 -15  149.05   40.84
  -6  -1 -15   49.31   20.40
  -6   1 -15  129.41   44.28
   1  -7 -12  895.81   98.18
   1  -7 -12  950.05   97.78
  -1   7  12  812.01   85.90
  -1  -7  12 1027.05  108.66
  -1  -7  12 1025.79   42.40
  -7  -3 -11  138.48   36.98
  -7  -3 -11  180.44   34.90
  -7   3 -11  229.61   51.80
   7   3  11  247.56   56.91
   7  -3  11  224.75   57.72
  -7  -3 -11  165.66   37.18
  -7   3 -11  242.79   51.67
  -1  -7 -12 1099.47  122.49
   1  -7  12 1100.99  101.70
  -1  -7 -12 1117.51  102.78
   1  -7  12  960.49   93.93
   1  -7  12 1090.84   90.49
  -1  -7 -12 1041.58   87.24
  -8  -3  -7  537.74   73.97
  -8  -3  -7  426.53   63.34
  -8   3  -7  571.52   60.50
  -8   3  -7  486.56   60.44
   8  -3   7  358.39   44.46
   8  -3   7  549.65   43.97
   8   3   7  495.94   74.16
  -9  -1  -3  627.75   76.19
   9  -1   3  523.99   63.23
   9   1   3  575.77   70.46
  -9  -1  -3  581.75   56.90
  -9   1  -3  443.61   73.23
  -3   0  19  103.24   28.70
  -3   0  19   66.36   18.91
   3   0 -19  107.36   24.45
  -7   0  13 1601.28  115.12
   7   0 -13 1543.01  117.33
   7   0 -13 1518.44  118.00
  -7   0  13 1688.19  127.35
  -3   0 -19  266.65   61.77
   3   0  19  338.51   50.52
   1   0 -20   14.56   20.35
  -1   0  20    0.42    4.44
  -1   0  20    2.67    6.41
   1   0  20    9.69    7.66
  -1   0 -20   14.67   11.47
  -7   0 -13 1652.77  143.64
  -7   0 -13 1553.21  113.20
  -7   0 -13 1524.23  112.73
   7   0  13 1574.45  122.33
   2   5 -16    7.71    2.76
  -2  -5  16   40.72   34.31
  -2  -5  16   62.45   26.57
   2  -5 -16   45.79   15.35
  -2   5  16   20.26   16.41
   0  -1  20  575.14   63.21
   0  -1  20  670.06   79.44
   0  -1 -20  869.47   91.00
   0  -1  20  616.60  120.39
   0   1 -20  713.05   81.53
  -9   0   4   11.80    5.68
   9   0  -4   15.13    8.87
   2  -5  16   48.20   17.63
   2   5  16   46.18   20.03
  -2  -5 -16   44.04   17.60
  -2  -5 -16   37.81   12.03
   2  -5  16   28.53   11.99
  -2   5 -16    3.99    8.62
  -2  -5 -16   36.94   13.76
   2  -5  16   -9.36   14.18
   9   0   4   11.91    8.94
  -9   0  -4   29.46   13.54
  -4  -1  18   77.51   24.43
  -4  -1  18   78.03   18.09
  -4   1  18   69.62   18.38
   4  -1 -18   90.05   31.82
  -4   1  18   79.20   24.76
   4   1 -18   59.95   21.11
   4   1  18  985.54  112.79
   4  -1  18 1082.30  106.16
  -4   1 -18 1025.10   72.92
  -4  -1 -18 1002.85  106.42
  -8   4   4  438.69   70.07
   8  -4  -4  422.37   51.79
   8  -4  -4  514.38   76.90
   8   4  -4  419.57   65.28
  -8  -4   4  393.26   54.68
  -8   4  -4   43.59   12.74
   8  -4   4  101.87   22.25
  -8   4  -4   33.21   21.51
   8   4   4  112.16   25.70
   8  -4   4   41.00   11.94
  -8  -4  -4   95.77   26.77
  -8  -4  -4  128.66   30.45
   0  -4  18   41.10   19.33
   0  -4  18   26.82   14.07
   0   4 -18    8.89    5.16
   0   4  18   36.96    9.10
   0  -4  18   22.72    6.41
   0  -4 -18   31.04   10.65
  -5   6  10  851.58   98.16
   5  -6 -10  782.81   76.27
   5  -6 -10  753.11   73.15
   5  -6 -10  995.77  103.82
   5   6 -10  784.00   76.48
  -5  -6  10  987.86  118.34
   8   0 -10 1409.01  109.54
  -8   0  10 1341.40   96.79
  -8   0  10 1449.13  105.67
  -5  -6 -10   15.84    7.96
   5  -6  10   -0.16    3.98
  -5  -6 -10    6.13   13.91
   5  -6  10   39.44   18.97
   5   6  10   20.32   13.00
  -5  -6 -10    5.96    8.50
   0   3 -19  464.44   68.57
   0  -3  19  584.18   94.86
   0  -3 -19  651.65   71.75
   0  -3  19  580.04  111.42
   0  -3  19  542.32   83.56
   0   3  19  433.11   63.17
  -8   0 -10  104.29   37.80
  -8   0 -10  100.68   22.37
   8   0  10   58.99   20.69
  -8   0 -10   97.66   24.21
   8   0  10   71.73   21.98
  -4  -6  12  225.66   44.12
   4  -6 -12  181.55   54.17
  -4   6  12  183.56   49.85
   4  -6  12   28.95   10.13
   4  -6  12   62.99   19.48
  -4  -6 -12   73.54   28.62
   4  -6  12   34.45   21.79
  -4  -6 -12   77.05   26.72
  -4  -6 -12   92.73   48.18
   4   6  12   77.25   31.42
   4  -6  12   33.72   10.71
  -5   0  17  692.46   76.16
   5   0 -17  710.47   85.30
  -5   0  17  595.63   61.72
   6  -6  -7   78.79   19.84
   6  -6  -7  114.98   26.56
   6   6  -7   66.93   24.11
  -6  -6   7   45.10   13.86
   6  -6  -7   57.05   16.87
   3   1 -19 1570.45  125.90
  -3   1  19 1414.13  104.78
  -3  -1  19 1476.69  111.31
  -3   1  19 1588.41  130.99
  -3  -1  19 1686.55  136.99
   3  -1 -19 1568.70  138.10
  -8  -2   9  170.90   44.38
   8   2  -9  278.68   47.36
  -8   2   9  193.76   36.86
  -8  -2   9  250.37   47.45
   8  -2  -9  222.61   40.94
  -8   2   9  192.23   36.45
   8  -2  -9  231.16   55.17
   8  -2  -9  111.29   28.22
   7  -1 -13   18.62   11.50
  -7  -1  13   35.39   14.20
  -7   1  13    8.07    7.81
   7   1 -13   14.21   11.85
  -7   1  13   20.36    6.83
  -7  -1  13   32.23   13.12
  -5   0 -17  200.97   52.43
   5   0  17  268.96   49.57
  -6  -6  -7 1451.38  110.20
   6  -6   7 1275.25  104.68
  -6  -6  -7 1333.02  105.33
   6   6   7 1386.07  109.89
   3   1  19 1510.54  153.73
  -3  -1 -19 1359.00  128.95
  -3   1 -19 1600.09  132.10
   3  -1  19 1531.59  125.00
  -8  -2  -9  468.13   87.88
  -8   2  -9  542.58   96.66
  -8  -2  -9  537.59   66.37
   8   2   9  526.58   74.53
  -8   2  -9  459.77   74.86
  -8  -2  -9  491.20   59.87
   8  -2   9  489.60   70.87
  -4  -8   0   27.13   21.96
   4   8   0   11.46    4.08
  -4  -8   0   28.00   18.42
   4  -8   0   16.28   11.78
   4  -8   0   35.35   10.54
  -1   1  20   73.87   28.71
   1   1 -20  109.12   25.19
  -1  -1  20   98.81   53.36
  -1   1  20   33.58    9.15
  -1  -1  20   97.09   23.78
  -1   1  20   62.90   16.28
  -1   1  20  143.24   33.58
   1  -1 -20  133.86   43.33
   1   1  20  164.74   48.40
  -1   1 -20   94.34   27.92
  -1  -1 -20  167.33   32.81
   1  -1  20  126.00   36.80
   1  -1  20  149.69   39.03
  -7  -1 -13   28.53   12.27
   7   1  13   43.77   18.74
  -7  -1 -13   48.31   13.81
   7  -1  13   41.55   22.29
  -7   1 -13   31.31   17.31
  -7  -1 -13   51.54   15.20
  -7   1 -13    4.41    3.81
  -7   1 -13   37.76   14.81
  -9  -2   0   34.54   20.89
  -9  -2   0   39.53   10.08
   9  -2   0   65.85   18.05
   9   2   0   35.03   16.25
  -9   2   0   54.53   18.78
   9   1  -4   12.23   21.17
  -9  -1   4    5.13    1.99
  -9  -1   4    8.04    1.93
  -9   1   4   18.64   10.49
   9  -1  -4   25.23   19.65
  -9  -1   4    4.60    9.40
  -9  -1  -4    7.81    2.84
  -9  -1  -4   21.57   13.75
  -9   1  -4    8.96   13.22
   9   1   4   26.15   19.11
   9  -1   4   18.46   11.77
  -4  -8   1  786.54  103.12
   4   8  -1  688.35   80.39
   4  -8  -1  787.30  106.31
   4  -8  -1  813.29   84.45
  -4  -8   1  528.24   80.60
   4  -8   1  640.99   71.97
  -4  -8  -1  702.38   98.60
  -4  -8  -1  626.05   71.45
   4  -8   1  611.79   72.04
   4   8   1  584.57   66.07
  -5  -7   6  152.42   48.91
   5   7  -6  136.40   26.47
  -5  -7   6  121.98   22.79
   5  -7  -6   88.64   36.99
  -5   7   6   88.17   20.35
   5  -7  -6  146.43   31.15
   5   7   6  535.40   83.89
   5  -7   6  553.12   78.16
  -5  -7  -6  498.12   61.31
  -5  -7  -6  629.03   86.89
   5  -7   6  553.47   65.32
   9  -2  -1   43.00   21.84
  -9  -2   1   42.95   12.85
  -9  -2   1   44.81   12.24
  -9  -2   1   66.73   27.90
   9   2  -1   54.07   25.76
  -9   2   1   40.34   24.98
  -9  -2  -1 1233.71   87.33
  -9  -2  -1 1271.08  100.36
   9   2   1 1309.01  125.23
   9  -2   1 1553.66  130.75
  -9   2  -1 1384.71  128.52
   1  -4 -18    7.96   15.08
  -1   4  18    9.05    2.72
  -1  -4  18    4.43    7.54
   1   4 -18    5.34    4.32
  -1  -4  18   -1.82   12.99
   1  -4  18  449.87   68.33
   1  -4  18  479.23  112.76
  -1  -4 -18  395.94   62.88
   1  -4  18  339.27   52.31
   1   4  18  488.52   66.18
   3  -8  -6  344.02   55.81
   3  -8  -6  350.66   57.87
  -3  -8   6  338.10   80.18
  -3  -8   6  317.18   36.47
  -3   8   6  380.13   55.08
   3  -8  -6  217.89   46.06
   0  -6 -15 1085.34   83.37
   0   6  15  930.95   94.60
   0  -6  15 1396.63  107.83
   0  -6  15 1145.67  128.23
   0  -6 -15 1170.73  110.36
  -3  -8  -6  523.88   72.07
   3   8   6  417.18   86.77
  -3  -8  -6  408.02   77.79
  -3  -8  -6  511.63   72.85
   3  -8   6  395.72   51.19
   3  -8   6  422.66   59.32
  -4  -3  17 1011.99  106.27
   4  -3 -17 1037.71   40.98
  -4   3  17 1214.78   94.87
  -4  -3  17 1009.95  118.14
   4   3 -17  758.87  103.23
  -1  -3  19   67.80   31.43
   1  -3 -19   52.69   18.36
   1   3 -19   42.21   16.13
  -1   3  19   47.56   10.84
  -1  -3  19   71.25   20.30
   8  -1 -10  691.48   79.19
  -8   1  10  578.52   63.15
  -8   1  10  512.24   68.71
   8   1 -10  711.81   89.16
  -8  -1  10  752.51   92.75
  -8  -1  10  542.85   72.62
  -1   3 -19  697.90   82.92
   1  -3  19  723.36   77.07
   1  -3  19  652.59   75.60
   1  -3  19  589.78  119.84
   1   3  19  813.30   99.75
  -1  -3 -19  669.08   85.61
   4  -7  -9  462.75   57.43
  -4   7   9  375.71   53.12
  -4  -7   9  513.85  118.50
  -4   7   9  470.95   57.25
   4  -7  -9  596.40  102.38
   4  -7   9 1434.09  101.81
   4  -7   9 1467.54  112.91
   4   7   9 1650.28  126.97
   4  -7   9 1736.05  130.41
  -4  -7  -9 1714.77  144.11
  -4  -7  -9 1893.96  147.73
  -4  -7  -9 1782.67  132.02
  -4  -3 -17  455.72   61.85
   4  -3  17  487.20   58.12
  -4  -3 -17  460.91   73.05
   4   3  17  376.62   97.35
  -4   3 -17  487.31   63.54
  -4  -3 -17  468.33   79.65
  -8   1 -10 1857.62  148.51
  -8  -1 -10 1898.05  171.32
   8  -1  10 1678.80  149.54
   8   1  10 1649.50  132.05
  -8  -1 -10 1836.24  134.44
  -8   1 -10 1771.76  132.59
  -8  -1 -10 1812.40  131.79
   8  -1  10 1528.18  114.11
  -8  -1 -10 1766.78  134.55
  -8   1 -10 1645.66  119.08
  -4  -8   2  895.62   91.77
   4  -8  -2 1025.59   44.22
   4  -8  -2 1062.63   83.97
  -4  -8   2 1106.78   84.66
  -3  -3  18  828.44   94.25
   3  -3 -18  900.98   95.75
  -3   3  18  852.95  103.26
  -3  -3  18  804.61   82.85
   3   3 -18  601.01   81.99
  -4  -8  -2  493.55   61.94
   4   8   2  507.20   76.65
   4  -8   2  430.61   59.61
  -4  -8  -2  488.23   68.28
   4  -8   2  549.96   56.73
   0  -8   9 1019.88   98.89
   0  -8  -9 1109.63   91.49
   0  -8   9  913.07   88.70
   0  -8  -9 1088.84  106.23
   0  -8   9 1046.26   93.60
   0  -8  -9 1170.51  106.72
  -5   1  17   77.85   18.76
   5   1 -17  104.56   35.66
  -5   1  17   74.77   23.69
  -5  -1  17  125.33   39.42
  -5  -1  17   92.49   32.75
  -9  -2   2    3.15    2.61
  -9   2   2    8.15    5.00
   9  -2  -2   12.93   16.59
  -9  -2   2   10.40    7.09
   9   2  -2   29.30   12.30
  -9  -2   2    5.76    2.73
   3   3  18   42.79   17.42
   3  -3  18   -2.20    6.36
  -3  -3 -18   21.45   15.91
  -3   3 -18   22.77   12.13
  -3  -3 -18    7.56   24.47
   9   0  -5 1377.12  116.82
  -9   0   5 1481.77  111.73
  -9  -2  -2   20.49   20.27
   9  -2   2   11.39   19.86
   9   2   2   16.13   14.34
  -9   2  -2   22.02   15.19
  -9  -2  -2    5.73    3.42
  -7   5   7   42.73   24.93
   7   5  -7   90.30   29.70
   7  -5  -7   89.48   22.91
  -7  -5   7  143.61   35.06
   7  -5  -7   71.84   23.14
   9   0   5  794.15  100.30
  -9   0  -5  705.07   74.12
  -9   0  -5  897.96   95.78
  -5   1 -17   -1.28   10.25
   5  -1  17   10.60   10.22
   5   1  17   13.56   20.45
  -5  -1 -17   14.06   17.58
  -5  -1 -17   12.89   21.80
  -5  -1 -17    3.30    9.27
   7  -5   7   16.54   11.17
  -7  -5  -7   21.13    6.72
  -7   5  -7   21.14   10.11
  -7  -5  -7    7.79    7.51
   7   5   7   18.59   15.79
  -3   4  17  166.78   61.27
  -3  -4  17  261.23   79.65
   3  -4 -17  194.69   43.49
  -3  -4  17  272.98   50.31
   3   4 -17  119.12   28.98
  -6  -3  14   33.35   16.96
   6  -3 -14   -1.90    5.57
  -6  -3  14   12.60    7.31
   6   3 -14   10.55   10.34
  -6   3  14    0.72    7.09
  -3  -4 -17    7.45    6.20
   3  -4  17    3.55    4.77
  -3  -4 -17   36.13   13.56
   3   4  17   -6.16   10.69
   3  -4  17    9.14    4.74
  -3  -4 -17    3.89    3.75
   8   4  -5   25.41    7.46
  -8   4   5   58.20   19.01
   8  -4  -5   25.72    8.66
  -8  -4   5   49.18   23.76
   8  -4  -5   42.69   19.57
  -4  -4  16  569.10   60.67
  -4  -4  16  718.23  107.34
   4   4 -16  464.99   59.26
   4   4 -16  336.87   50.53
  -4   4  16  460.42   76.14
   4  -4 -16  557.18   77.09
   2  -8  -8   48.00   18.40
   2  -8  -8   36.46   15.12
  -2  -8   8   35.15   22.18
   8  -4   5  285.58   67.56
  -8   4  -5  403.30   59.87
   8  -4   5  285.48   51.98
   8   4   5  369.42   56.39
  -8  -4  -5  368.13   55.93
  -8   4  -5  467.27   68.01
  -8  -4  -5  390.87   53.97
  -6  -3 -14  738.60   85.60
   6  -3  14  882.31  117.13
  -6  -3 -14  807.65   91.38
   6   3  14  892.39  124.97
  -6  -3 -14  887.91  108.66
  -6  -3 -14  821.48   99.92
   2  -8   8  509.00   83.86
  -2  -8  -8  518.15   66.86
  -2  -8  -8  436.02   66.29
  -2  -8  -8  458.58   57.57
   2  -8   8  408.31   58.04
  -4  -4 -16    6.77   11.76
  -4  -4 -16    4.32    8.39
   4   4  16   11.01    9.47
  -4  -4 -16   10.41    8.71
   4  -4  16   29.63   11.07
  -4  -4 -16   12.75    7.50
  -1   6  15   39.25   11.64
  -1  -6  15   52.15   20.20
   1  -6 -15   40.70   14.96
   1  -6 -15   56.75   23.41
  -1  -6  15   38.02   21.30
   1  -6  15    6.07    5.70
  -1   6 -15    4.24    2.47
  -1  -6 -15    3.13    3.56
  -1  -6 -15   19.37    7.72
   1  -6  15   -4.34    9.89
   1  -6  15   10.33    5.58
  -1  -6 -15   14.09    6.61
   2  -7 -12   95.98   24.28
  -2  -7  12   38.91   27.71
   2  -7 -12   41.84   13.18
   2  -7  12  724.16   78.68
   2  -7  12  679.47   74.61
  -2  -7 -12  684.93   80.07
   2  -7  12  661.39   76.16
  -2  -7 -12  788.36   81.28
  -2  -7 -12  726.16  103.45
  -8  -3   8 1830.22  142.55
  -8   3   8 1661.91  129.89
   8   3  -8 1718.09  124.85
   8  -3  -8 1490.83  106.12
  -6  -2  15   22.32    8.38
  -6  -2  15   68.76   21.54
   6   2 -15   31.51   12.15
  -6   2  15   18.61    3.60
  -6   2  15   11.80   11.71
   6  -2 -15   71.18   19.35
  -7  -4  10 2308.34   88.94
  -7   4  10 2182.56  157.44
   7   4 -10 2281.82   57.96
   7  -4 -10 2172.85  155.33
  -7   4  10 2400.43   51.99
   1  -8  -9   46.16   28.10
   1  -8  -9   52.15   15.11
  -1  -8   9   12.93    9.82
  -1  -8  -9   65.52   20.25
   1  -8   9   66.82   18.56
  -1  -8  -9   28.17   10.97
   1  -8   9   45.53   15.75
  -1  -8  -9   78.81   24.47
  -8  -3  -8   43.62   23.52
   8   3   8   57.83   28.38
  -8   3  -8  128.85   35.32
   8  -3   8   32.53   21.43
  -8  -3  -8   53.26   26.17
  -8   3  -8   50.51   20.26
   8  -3   8   41.53   15.33
  -4  -8   3   46.89   23.64
  -4  -8   3   27.22    7.22
   4  -8  -3   48.20   19.28
   4  -8  -3   68.74   20.26
  -4  -8  -3   62.52   25.27
   4  -8   3   89.57   25.69
   4   8   3   48.00   18.25
   4  -8   3   83.78   25.36
  -4  -8  -3   80.88   23.92
   5  -5 -13   66.58   22.86
  -5  -5  13   46.51   21.97
   5   5 -13   39.42   10.31
  -5   5  13   38.04   23.10
   5   5 -13   76.85   15.78
   0   5  17  107.41   22.14
   0  -5  17   71.54   20.33
   0  -5 -17  153.69   43.31
   0  -5  17  175.61   46.23
   0  -5  17  159.22   46.54
   0   5 -17  102.93   15.37
  -3  -7  11  184.64   55.78
  -3   7  11  102.12   28.10
   3  -7 -11  131.10   26.60
   3  -7 -11  196.10   51.11
  -2   0  20   28.91   16.14
  -2   0  20    7.17    6.59
   2   0 -20   42.93   20.16
  -7  -4 -10 1237.07  116.25
  -7  -4 -10  972.40  104.40
  -7   4 -10  911.12   97.73
  -7  -4 -10 1058.25   92.09
   7   4  10 1012.85  104.28
   7  -4  10 1101.61  106.56
  -9  -2   3  421.78   48.55
   9  -2  -3  518.18   68.15
   9   2  -3  422.13   59.91
  -9   2   3  583.79   68.20
  -9  -2   3  489.87   56.33
  -9  -2   3  549.42   45.40
  -6   2 -15  453.69   64.16
   6  -2  15  501.65  103.53
  -6  -2 -15  479.18   58.93
  -6  -2 -15  382.79   62.76
  -6  -2 -15  385.11   86.88
   6   2  15  495.18  108.80
  -3  -7 -11 1234.90  106.74
  -3  -7 -11 1302.33  112.06
   3   7  11 1148.62   95.70
   3  -7  11 1068.36   80.36
   3  -7  11 1013.79  103.29
  -3  -7 -11 1220.18   94.47
   3  -7  11  869.54   88.59
   3  -7  11 1108.46  119.36
  -2   0 -20 1596.41  122.34
   2   0  20 1559.34  122.23
  -9  -2  -3 1295.45   94.20
   9  -2   3 1478.80  112.12
  -9  -2  -3 1417.65  125.82
   9   2   3 1346.59  104.40
  -9   2  -3 1359.31  106.75
  -5  -5 -13  113.58   31.50
   5  -5  13  115.28   26.75
  -5  -5 -13   67.83   30.14
   5   5  13  102.51   45.74
  -5  -5 -13   78.76   39.37
   9  -1  -5   15.53   11.19
   9   1  -5    2.55   15.86
  -9   1   5   12.04    4.61
  -9  -1   5   16.94   11.10
  -9  -1   5   11.86    3.31
   9  -1   5  821.49   92.26
  -9   1  -5  929.16   99.74
  -9  -1  -5  843.46   86.58
  -9  -1  -5  886.88  104.95
   9   1   5  859.73  113.88
   0  -2  20 1859.32  171.01
   0  -2 -20 1932.44  143.47
   0   2 -20 2119.42  159.52
   0  -2  20 1915.04  139.57
   0  -2  20 1659.08  127.57
   0  -9   0   10.61   11.30
   0  -9   0   -1.02    8.74
   0  -9   0   10.38    5.79
   0   9   0    1.17    3.34
  -4   2  18  250.33   71.97
  -4  -2  18  167.19   45.54
   4  -2 -18  300.90   71.65
   4   2 -18  167.79   46.43
  -4  -2  18  178.74   39.90
  -4   2  18  162.13   23.25
  -4   2  18  154.34   22.04
  -4  -2 -18  514.43   71.03
  -4   2 -18  448.34   64.51
  -4  -2 -18  452.76   71.50
   4  -2  18  500.06   94.70
   4   2  18  439.35  103.73
   0  -9  -1  581.69   79.59
   0  -9   1  718.89   91.79
   0  -9  -1  544.31   68.35
   0   9  -1  456.42   55.64
   0  -9  -1  617.11   82.06
   5  -3 -16   18.16   11.66
   5   3 -16    9.13    6.58
  -5  -3  16   33.55   14.86
  -5   3  16   11.21    6.20
  -5  -3  16   -6.05    6.75
   7   6   0   14.50    8.77
  -7   6   0    8.86    4.94
   7  -6   0    6.55    7.46
   7  -6   0    1.12    1.26
  -7  -6   0    9.11    6.44
  -7  -6   0    7.70    6.51
   7  -6   0    8.13    5.95
  -5  -3 -16  758.87   97.66
  -5  -3 -16 1107.17   92.17
   5   3  16 1081.32   86.91
   5  -3  16  960.71  107.52
  -5  -3 -16 1017.38  121.08
   1  -5 -17   26.97   11.77
  -1  -5  17   28.86   16.74
  -1   5  17   23.63    4.79
   1   5 -17   31.91    8.31
  -1  -5  17   46.74   28.28
   7  -6  -1   42.41   14.88
  -7  -6   1   43.79   19.74
   7  -6  -1   34.02   16.94
   7  -6  -1   11.94    5.27
   7   6  -1   20.97    9.82
  -7  -6   1   30.53   32.01
   0   7  13  928.83  115.98
   0  -7  13 1267.62  109.56
   0  -7 -13 1281.78   95.02
   0  -7  13 1419.42  122.99
   0  -7 -13 1421.18  111.24
  -7   6  -1  143.66   25.53
  -7  -6  -1  246.96   48.86
  -7  -6  -1  319.99   44.46
   7   6   1  223.20   52.48
   7  -6   1  344.44   73.56
   7  -6   1  140.89   24.51
   7  -6   1  236.04   43.68
   6   5 -11   30.45   15.10
  -6   5  11   10.00    8.49
   6  -5 -11   16.24    7.46
  -6  -5  11   10.11   12.54
  -1   5 -17  114.55   27.87
   1  -5  17  151.17   32.59
   1   5  17   80.29   18.90
   1  -5  17  185.48   47.80
   1  -5  17  131.95   34.03
  -1  -5 -17  128.84   39.39
   5  -7  -7   36.62   10.80
   5  -7  -7   13.77    6.62
   5   7  -7    9.18    4.79
  -5   7   7   11.92    6.45
  -5  -7   7   16.48    6.93
  -5   7   7    6.97    3.33
   6  -6  -8  238.93   45.49
   6  -6  -8  263.28   50.66
  -6   6   8  312.50   55.99
   6   6  -8  260.76   43.33
   6  -6  -8  246.67   48.84
  -6  -6   8  350.60   88.28
  -5  -7  -7  132.33   35.73
   5  -7   7  181.39   46.86
   5   7   7  143.02   37.96
  -5  -7  -7  174.13   59.71
  -5  -7  -7  174.23   40.53
   5  -7   7  157.00   40.15
  -2   1  20 2214.02  161.67
   2  -1 -20 2141.78  171.32
  -2   1  20 2001.26  144.76
  -2   1  20 2181.89  161.34
  -2  -1  20 2218.34  166.75
  -2  -1  20 2192.48  159.11
  -6  -5 -11 1344.24  104.74
  -6  -5 -11 1187.90  100.38
   6   5  11 1134.20  106.60
   6  -5  11 1221.42   97.66
  -6  -5 -11 1212.09   98.08
  -6  -6  -8  143.63   35.98
  -6  -6  -8  114.28   36.79
   6   6   8  135.49   35.55
   6  -6   8  125.54   42.26
  -6  -6  -8  161.30   58.04
  -2  -1 -20 1332.73  109.51
   2  -1  20 1277.73  102.80
  -2   1 -20 1338.15  108.29
   2   1  20 1224.21  110.21
  -3   2  19  124.27   24.32
  -3   2  19  129.36   26.66
  -3   2  19  191.62   56.62
   3   2 -19  191.77   47.93
  -3   2  19  102.40   15.90
   3  -2 -19  204.10   49.47
  -3  -2  19  190.26   50.43
  -3  -2  19  228.19   44.12
   6  -4 -13   56.00   15.81
   6   4 -13   66.40   21.79
  -6  -4  13   73.91   30.22
  -6   4  13   32.33   10.22
  -6   4  13   68.56   20.30
  -7  -2  13  984.87  106.50
  -7   2  13  922.74   93.97
  -7   2  13 1135.19  116.23
   7  -2 -13  934.94  100.90
   7   2 -13  962.23  116.13
   7  -2 -13  794.05   81.72
   3  -8  -7   39.85   16.92
  -3   8   7  106.76   25.27
   3  -8  -7   91.00   25.69
  -3  -8   7   55.68   30.96
   3  -8  -7  102.80   29.11
  -3  -2 -19  578.61  112.09
   3  -2  19  482.58   65.99
   3   2  19  537.90  106.51
  -3   2 -19  506.37   65.43
   3  -8   7  111.82   32.81
  -3  -8  -7  123.27   24.21
   3  -8   7   93.61   24.98
  -3  -8  -7  100.81   19.64
   3   8   7  115.40   37.12
  -3  -8  -7   82.57   29.22
   9   0  -6    8.35    7.54
  -9   0   6   13.69   10.17
   0  -9  -2  446.99   63.66
   0  -9  -2  392.07   63.24
   0  -9   2  381.25   54.44
   0   9  -2  230.52   48.92
   0  -9  -2  387.33   51.40
  -1   2  20  318.34   52.45
   1   2 -20  278.06   55.76
  -1   2  20  167.46   35.79
   1  -2 -20  321.02   79.52
  -1   2  20  148.42   60.84
  -1   2  20  158.38   38.62
  -1  -2  20  256.17   42.32
  -1  -2  20  335.48   78.85
  -6  -4 -13  337.46   67.04
   6   4  13  333.84   57.74
  -6  -4 -13  228.05   65.56
   6  -4  13  275.36   73.60
  -6  -4 -13  395.26   67.81
  -9   0  -6    0.74    2.41
  -9   0  -6    6.11    9.06
  -9   0  -6    9.23   13.14
   9   0   6   11.31   10.75
   1  -2  20   81.67   26.63
   1   2  20   70.42   28.94
   1  -2  20   93.30   30.19
  -1   2 -20   40.41   23.68
   1  -2  20  159.23   38.75
  -1  -2 -20   64.71   17.37
  -7   2 -13  502.02   72.42
   7  -2  13  513.65   80.45
   7   2  13  647.20   83.76
  -7  -2 -13  570.86   80.53
  -7  -2 -13  612.57   64.43
  -7   2 -13  517.93   78.92
  -7  -2 -13  583.28   67.56
  -7   2 -13  530.66   62.88
  -7  -2 -13  612.44  108.49
   4  -8  -4  492.87   67.47
   4  -8  -4  508.97   65.40
  -4  -8   4  460.99   96.06
  -4  -8   4  353.48   44.76
   4  -8   4  862.19   94.87
   4  -8   4  976.79  126.86
  -4  -8  -4 1038.26   77.25
  -4  -8  -4 1005.97  121.55
   4   8   4 1024.67   52.17
  -7   3  12  212.81   52.27
   7   3 -12  187.45   45.29
   7  -3 -12  177.70   39.88
  -7  -3  12  182.24   48.44
   7  -3 -12   91.41   22.99
   9   2  -4  143.35   50.34
   9  -2  -4  186.74   47.90
  -9   2   4   99.06   27.76
  -9  -2   4   75.78   19.40
  -9  -2   4  115.48   32.89
  -9  -2   4  145.80   28.41
   1  -9   0  370.33   51.93
   1  -9   0  289.36   48.18
  -1  -9   0  297.93   71.39
   1  -9   0  289.92   76.48
  -1   9   0  155.57   35.95
  -1  -9   0  378.57   87.58
  -2   4  18  154.64   72.13
  -2  -4  18  165.52   45.40
   2  -4 -18  196.54   51.75
  -2  -4  18  229.31   59.56
   2   4 -18  103.69   18.05
   3  -6 -14 1274.51   98.91
  -3  -6  14 1308.46  103.04
  -3  -6  14 1231.05  117.43
  -3   6  14 1158.91  118.91
  -9  -2  -4  134.97   35.05
   9   2   4   81.43   26.29
  -9   2  -4  181.23   53.11
  -9  -2  -4  125.30   27.64
   9  -2   4  123.09   26.93
   2  -4  18   60.91   24.89
  -2  -4 -18   34.31   12.19
   2  -4  18   17.97    9.31
   2  -4  18    8.04   13.06
   2   4  18   21.43   13.07
  -3  -6 -14   10.06   10.60
  -3  -6 -14    2.10    8.88
   3  -6  14    6.65    6.30
   3  -6  14    7.42    6.24
  -3  -6 -14    1.90    6.66
   3  -6  14    2.91   15.14
   3   6  14   13.75   13.13
  -7   3 -12  365.10   74.75
  -7  -3 -12  408.56   86.18
  -7  -3 -12  304.48   55.28
  -7  -3 -12  471.22   62.05
  -7  -3 -12  400.71   54.47
   7   3  12  334.47  100.10
   7  -3  12  473.86   95.67
   8  -4  -6   24.73   22.72
  -8   4   6   54.07   14.23
   8  -4  -6   23.04    9.67
   8   4  -6   32.86   16.43
  -8  -4   6   25.72   22.71
   7  -6  -2  747.31   86.51
  -7  -6   2  983.53  108.54
   7   6  -2  944.87  115.63
   7  -6  -2  950.75  104.00
  -7  -6   2 1007.04  111.66
   2  -3 -19  731.41   76.19
  -2  -3  19  768.30   80.43
  -2   3  19  595.24   59.20
  -2  -3  19  738.25   86.16
  -2   3  19  630.34   62.41
   2   3 -19  475.77   70.33
  -2   3  19  518.00  114.13
   7   6   2 2284.42   65.41
  -7  -6  -2 2306.51   59.97
  -7   6  -2 2073.77  145.10
  -7  -6  -2 2443.07   61.48
   7  -6   2 2129.12  175.68
   7  -6   2 2097.63  154.45
   8  -4   6  455.33   61.09
  -8  -4  -6  417.37   69.27
   8  -4   6  286.74   45.42
   8   4   6  426.62   64.41
  -8   4  -6  393.77   58.42
  -8   4  -6  303.14   51.47
  -8  -4  -6  434.51   65.61
   1  -9  -1  553.67   61.92
  -1   9   1  445.01   56.71
  -1  -9   1  561.37   98.29
   1  -9  -1  618.34  118.51
   1  -9  -1  553.19   68.10
  -1   9  -1   -0.25    1.75
  -1  -9  -1   10.90   15.00
   1  -9   1    3.75    4.12
   1  -9   1    1.97   21.41
  -1  -9  -1    6.32    8.13
   2  -3  19  140.76   32.71
   2   3  19  162.99   39.84
   2  -3  19  142.81   41.18
  -2   3 -19   85.58   28.02
  -2  -3 -19   85.31   50.23
  -6  -7   0  108.75   26.79
   6  -7   0  120.42   26.51
  -6  -7   0  140.82   41.27
   6  -7   0  169.50   37.04
   6   7   0  101.95   17.43
   6  -7   0  121.06   33.90
  -5   4  15  544.75   85.73
   5  -4 -15  439.01   75.55
  -5  -4  15  521.47   81.90
   5   4 -15  508.82   68.07
   5   4 -15  333.24   53.25
  -5  -4  15  497.15   59.05
  -8   2  10  441.76   73.53
   8  -2 -10  430.44   66.94
  -8   2  10  331.63   49.63
   8  -2 -10  278.30   53.99
  -8  -2  10  400.44   79.39
   8  -2 -10  419.61   56.16
   8   2 -10  427.75   63.56
   5  -6 -11   20.75   13.31
  -5   6  11    0.06    6.34
  -8   0  11   -1.57    4.44
  -8   0  11   -1.12    4.31
   8   0 -11    7.71    7.18
  -1  -7  13  539.08   73.04
   1  -7 -13  500.17   82.84
   1  -7 -13  470.92   68.04
  -1  -7  13  470.56   83.69
  -1   7  13  333.46   51.09
  -5  -6 -11    6.57   15.66
  -5  -6 -11   13.45    6.61
   5   6  11   11.30   17.69
   5  -6  11    6.36    7.64
  -5  -6 -11   19.63    8.42
   5  -6  11    5.39    7.81
   5   4  15  378.29  101.49
  -5  -4 -15  424.29   70.97
  -5  -4 -15  336.47   65.78
  -5  -4 -15  413.09   55.36
   5  -4  15  414.00   75.85
  -5  -4 -15  349.59   80.46
  -6   0  16  433.61   56.13
   6   0 -16  384.24   51.31
   6   0 -16  531.86   67.25
  -6   0  16  396.58  101.16
  -1  -7 -13   91.16   26.85
   1  -7  13   48.43   14.91
   1  -7  13   21.34   11.86
  -1  -7 -13   97.96   26.75
  -1  -7 -13   74.88   22.86
   1  -7  13   66.75   25.21
  -8   2 -10   94.25   36.62
   8  -2  10   27.23    8.09
   8   2  10   44.05   17.53
  -8  -2 -10   29.15   10.68
  -8  -2 -10   94.11   28.73
   8  -2  10   28.83    8.19
  -8   2 -10   79.20   23.27
  -8  -2 -10   36.55   15.72
  -8  -2 -10   44.57   23.80
   6   7  -1  760.13   84.10
   6  -7  -1  755.30   98.94
   6  -7  -1  735.84   96.32
  -6  -7   1  724.67   83.90
   6  -7  -1  710.64   74.44
  -6  -7   1  824.39   85.54
  -6  -7  -1  189.39   39.95
   6  -7   1  229.28   50.37
   6   7   1  168.95   39.85
   6  -7   1  179.34   37.64
  -6  -7  -1  226.10   37.80
   6  -7   1  156.25   33.95
   8   0  11   32.69    9.08
  -8   0 -11   15.14   20.07
  -8   0 -11   -0.84    5.78
  -8   0 -11   19.05   13.83
  -3  -5  16 1015.13  106.00
   3   5 -16  793.98   76.63
  -3  -5  16 1121.89   90.65
   3   5 -16  761.88   73.54
   3  -5 -16  969.09  108.39
  -3   5  16  866.40   96.09
  -6   0 -16   69.01   24.81
  -6   0 -16   68.71   24.00
   6   0  16   51.81   16.93
  -6   0 -16   93.37   31.35
   7   5  -8  397.24   47.45
  -7   5   8  366.55   45.19
  -7  -5   8  470.85   91.37
   7  -5  -8  395.93   58.73
   7  -5  -8  297.55   49.09
  -3  -5 -16 1763.32  134.78
   3  -5  16 1544.66  136.45
  -3  -5 -16 1360.22  104.82
  -3  -5 -16 1899.57  140.63
   3  -5  16 1597.17  132.20
   3   5  16 1741.18  131.48
   3  -5  16 1705.37  124.46
  -3  -5 -16 1530.57  119.07
  -5  -2  17   10.14    8.07
  -5   2  17   26.53   12.50
  -5  -2  17    7.89   13.01
   5  -2 -17   16.70   10.46
  -7   5  -8  296.42   60.81
  -7  -5  -8  348.31   63.47
   7   5   8  247.71   64.41
  -7  -5  -8  304.25   67.39
   7  -5   8  288.25   68.95
  -1  -9   2  174.00   44.12
   1  -9  -2  262.65   45.04
   1  -9  -2  227.61   67.41
   1  -9  -2  211.04   40.26
  -1   9  -2  229.49   41.36
  -1  -9  -2  304.59   72.18
  -1  -9  -2  319.48   43.30
  -1  -9  -2  313.22   53.68
   1  -9   2  284.55   47.01
   1  -9   2  354.15   90.68
  -5  -2 -17  973.75  112.85
  -5   2 -17  902.89   94.55
   5  -2  17 1066.27   99.35
  -5  -2 -17  991.63  109.16
  -5  -2 -17  881.00  105.99
   0  -9  -3   42.37   13.67
   0   9  -3   10.16    9.75
   0  -9   3   10.07    5.89
   0  -9  -3   31.07   15.59
   0  -9  -3   40.85   15.64
   0  -9   3   16.93   11.68
   9   1  -6  166.65   33.04
  -9   1   6  175.40   44.21
  -9  -1   6  217.87   55.67
   9  -1  -6  181.69   64.56
  -9  -1   6  101.26   15.92
   9  -1   6  157.88   51.57
  -9   1  -6  162.69   53.04
   9  -1   6   69.48   14.91
  -9  -1  -6  109.69   27.91
   9   1   6  120.75   53.33
  -9  -1  -6  151.31   37.05
   7   0 -14    1.29    3.54
  -7   0  14    4.98    4.26
  -7   0  14   -3.45   11.77
  -2  -6  15  492.10   70.01
  -2  -6  15  584.77   84.40
   2  -6 -15  495.41   62.48
   2  -6  15   28.54   16.70
   2   6  15   90.99   25.57
   2  -6  15    3.95    8.95
  -2  -6 -15   37.53   11.93
  -2  -6 -15   11.41   17.35
  -2  -6 -15   18.95   10.08
   2  -6  15   26.12   15.86
  -2  -6 -15   22.01   12.33
  -2   6 -15   21.87    9.22
   4  -7 -10   22.61   16.89
  -4   7  10    9.78    9.09
  -4   7  10   14.62   14.10
  -4  -7  10   55.83   19.08
   4  -7 -10   12.06    4.94
  -4   5  15 1920.33  171.21
  -4  -5  15 2051.95  152.27
   4   5 -15 1894.92  130.44
  -4  -5  15 2056.27  177.62
[truncated: 722,625 more chars]
